# Supplementary material for: β-N-Methylamino-L-Alanine (BMAA) Causes Severe Stress in Nostoc sp. PCC 7120 Cells under Diazotrophic Conditions: A Proteomic Study
Source: Toxins (Basel). 2021 Apr 30;13(5):325. doi: 10.3390/toxins13050325 (PMC8147232; doi:10.3390/toxins13050325)
Supplement: Supplementary file 1 [file toxins-13-00325-s001.zip › Supplementary Table S1.xls]

## Sheet: Лист1
BG110 - Control / BG110 plus BMAA
Protein IDs	Welch's t-test p-value	Benjamini-Yekutieli "adjusted p-value"	Difference significant at 5% FDR	At least 2 unique peptides on average	Fold change	SD	+/- 95% confidence interval	g - if greater than 0.05, use CI95% endpoints (Fieller, 1954)	Lower CI95% endpoint	Upper CI95% endpoint	Peptides (non_normal)	Razor and unique peptides (non_normal)	Unique peptides (non_normal)	Median unique peptides (non_normal)	Identification type (non_normal)	Sequence coverage, %, (non_normal)	Reported intensity (non_normal)	Reported LFQ intensity (non_normal)	MS/MS count (non_normal)	Peptides (non_bmaa)	Razor and unique peptides (non_bmaa)	Unique peptides (non_bmaa)	Median unique peptides (non_bmaa)	Identification type (non_bmaa)	Sequence coverage, %, (non_bmaa)	Reported intensity (non_bmaa)	Reported LFQ intensity (non_bmaa)	MS/MS count (non_bmaa)
all2638	0.000122913	0.285194	false	false	2.28979	0.927311	1.37695	0.0110703	0.930553	3.7003	0; 1; 0; 1; 1; 0; 2; 1; 2	0; 1; 0; 1; 1; 0; 2; 1; 2	0; 1; 0; 1; 1; 0; 2; 1; 2	1	By matching; By matching; By matching; By matching; By matching; By matching; By MS/MS; By matching; By MS/MS	0; 2.7; 0; 2.7; 2.7; 0; 2.7; 2.4; 2.7	0; 25716; 0; 13780; 6928.5; 0; 32312; 15366; 63761	0; 0; 0; 0; 0; 0; 53893; 0; 85692	0; 0; 0; 0; 0; 0; 4; 0; 6	1; 0; 1; 1; 1; 1; 1; 2; 1	1; 0; 1; 1; 1; 1; 1; 2; 1	1; 0; 1; 1; 1; 1; 1; 2; 1	1	By matching; By matching; By matching; By matching; By matching; By matching; By MS/MS; By matching; By matching	2.7; 0; 2.7; 2.7; 2.7; 2.7; 2.7; 2.7; 2.7	35235; 0; 4449.4; 99382; 93927; 50567; 70614; 108920; 20724	0; 0; 0; 36713; 25608; 0; 34440; 33870; 0	0; 0; 0; 0; 0; 0; 2; 0; 0
all3272	0.000147968	0.285194	false	truth	0.217848	0.137295	0.0799004	0.0460309	0.145881	0.310837	5; 5; 6; 5; 5; 6; 4; 5; 4	5; 5; 6; 5; 5; 6; 4; 5; 4	5; 5; 6; 5; 5; 6; 4; 5; 4	5	By MS/MS; By MS/MS; By MS/MS; By MS/MS; By MS/MS; By MS/MS; By MS/MS; By MS/MS; By MS/MS	19.9; 21.3; 24.6; 18.8; 24.4; 23.2; 16.5; 21.6; 16.5	5660; 24255; 19604; 23331; 9100.2; 45535; 17630; 38926; 31044	12500; 8886.6; 19321; 15416; 9367.1; 14630; 15763; 34768; 29203	5; 2; 5; 5; 0; 1; 5; 6; 7	7; 8; 5; 8; 9; 10; 11; 8; 9	7; 8; 5; 8; 9; 10; 11; 8; 9	7; 8; 5; 8; 9; 10; 11; 8; 9	8	By MS/MS; By MS/MS; By MS/MS; By MS/MS; By MS/MS; By MS/MS; By MS/MS; By MS/MS; By MS/MS	29.4; 33.1; 20.2; 34.2; 37.8; 42; 45.4; 31.9; 37.5	71387; 68296; 90689; 259530; 261340; 210490; 125940; 180300; 193310	71339; 42144; 62799; 116140; 111680; 73679; 56619; 115200; 117810	6; 8; 7; 31; 18; 32; 17; 3; 20
all5265	0.000110277	0.285194	false	truth	0.495106	0.191201	0.116066	0.0186805	0.386987	0.622075	3; 5; 3; 3; 2; 7; 4; 4; 5	3; 5; 3; 3; 2; 7; 4; 4; 5	3; 5; 3; 3; 2; 7; 4; 4; 5	4	By MS/MS; By MS/MS; By MS/MS; By MS/MS; By matching; By MS/MS; By MS/MS; By MS/MS; By MS/MS	5.9; 11.6; 6.4; 6.8; 3.4; 17.2; 9; 7.4; 8.8	8197.5; 12746; 11195; 14392; 21041; 22815; 13026; 5784.9; 11959	10561; 21534; 18317; 0; 13030; 11118; 8515; 13904; 17038	1; 2; 2; 3; 0; 0; 2; 2; 4	7; 6; 3; 7; 6; 7; 7; 5; 9	7; 6; 3; 7; 6; 7; 7; 5; 9	7; 6; 3; 7; 6; 7; 7; 5; 9	7	By MS/MS; By MS/MS; By MS/MS; By MS/MS; By MS/MS; By MS/MS; By MS/MS; By MS/MS; By MS/MS	15.5; 10.9; 6.8; 15.2; 12.4; 16; 13; 10.2; 19.4	41105; 37393; 23833; 42110; 63579; 63751; 39766; 66802; 220520	36061; 27365; 21936; 27117; 29224; 35568; 27086; 30018; 32131	3; 7; 5; 4; 2; 8; 6; 2; 7
alr4641	0.000132694	0.285194	false	truth	0.439129	0.181253	0.105482	0.0248157	0.342905	0.557702	8; 6; 7; 7; 8; 7; 7; 7; 8	8; 6; 7; 7; 8; 7; 7; 7; 8	8; 6; 7; 7; 8; 7; 7; 7; 8	7	By MS/MS; By MS/MS; By MS/MS; By MS/MS; By MS/MS; By MS/MS; By MS/MS; By MS/MS; By MS/MS	55.7; 39.9; 43.3; 43.3; 55.2; 43.3; 55.2; 55.2; 55.7	237110; 231770; 225160; 288630; 235000; 522540; 403650; 503680; 449630	172950; 162310; 150600; 234630; 125770; 271940; 252320; 308840; 285220	16; 18; 24; 18; 17; 9; 25; 23; 32	9; 8; 9; 7; 7; 9; 9; 9; 7	9; 8; 9; 7; 7; 9; 9; 9; 7	9; 8; 9; 7; 7; 9; 9; 9; 7	9	By MS/MS; By MS/MS; By MS/MS; By MS/MS; By MS/MS; By MS/MS; By MS/MS; By MS/MS; By MS/MS	56.2; 55.7; 55.7; 47.8; 55.2; 56.2; 52.7; 56.2; 43.3	458150; 543420; 381810; 982600; 1205500; 1478300; 937980; 1006200; 753690	365660; 332190; 309280; 681140; 664920; 724760; 508580; 603380; 518740	21; 29; 26; 20; 21; 27; 34; 12; 23
alr5275	0.000106166	0.285194	false	truth	1.49861	0.357589	0.208103	0.0118262	1.30643	1.72665	9; 7; 7; 8; 6; 7; 7; 8; 11	9; 7; 7; 8; 6; 7; 7; 8; 11	9; 7; 7; 8; 6; 7; 7; 8; 11	7	By MS/MS; By MS/MS; By MS/MS; By MS/MS; By MS/MS; By MS/MS; By MS/MS; By MS/MS; By MS/MS	27.7; 25.4; 25.4; 27.5; 16.4; 24.2; 22.9; 27.9; 35.1	222770; 191170; 157680; 149480; 213780; 125190; 158110; 185530; 141640	120420; 110830; 98022; 94794; 107980; 85910; 89699; 88703; 80701	23; 18; 17; 29; 21; 8; 27; 28; 24	6; 5; 7; 8; 6; 8; 8; 6; 7	6; 5; 7; 8; 6; 8; 8; 6; 7	6; 5; 7; 8; 6; 8; 8; 6; 7	7	By MS/MS; By MS/MS; By MS/MS; By MS/MS; By MS/MS; By MS/MS; By MS/MS; By MS/MS; By MS/MS	18.1; 18.1; 23.1; 29.4; 20.8; 25.8; 24.8; 21; 26.1	57706; 44251; 62802; 150910; 131130; 160790; 186570; 122510; 114810	40678; 60273; 47256; 81412; 74146; 81844; 83769; 76735; 70572	7; 10; 11; 16; 12; 14; 16; 6; 12
asl4547	4.62095e-05	0.285194	false	truth	0.525572	0.144073	0.0838448	0.0139331	0.448237	0.617759	5; 4; 5; 5; 5; 5; 4; 5; 4	5; 4; 5; 5; 5; 5; 4; 5; 4	5; 4; 5; 5; 5; 5; 4; 5; 4	5	By MS/MS; By MS/MS; By MS/MS; By MS/MS; By MS/MS; By MS/MS; By MS/MS; By MS/MS; By MS/MS	54.4; 43.3; 54.4; 54.4; 54.4; 64.4; 41.1; 54.4; 53.3	60990; 46614; 61377; 56953; 53212; 124670; 37377; 46510; 37417	33735; 26829; 34222; 28809; 29664; 36910; 30259; 25931; 25595	12; 7; 13; 19; 13; 4; 7; 12; 6	5; 5; 6; 5; 5; 5; 6; 5; 5	5; 5; 6; 5; 5; 5; 6; 5; 5	5; 5; 6; 5; 5; 5; 6; 5; 5	5	By MS/MS; By MS/MS; By MS/MS; By MS/MS; By MS/MS; By MS/MS; By MS/MS; By MS/MS; By MS/MS	54.4; 54.4; 54.4; 54.4; 54.4; 54.4; 54.4; 54.4; 54.4	56185; 44561; 53057; 119770; 160230; 188780; 117480; 115560; 83275	45238; 52298; 45260; 83818; 77991; 77967; 62565; 57443; 46042	13; 11; 14; 16; 16; 10; 10; 4; 11
all2501	0.000271504	0.454928	false	truth	1.88581	0.664525	0.386728	0.0214998	1.53411	2.32039	6; 5; 4; 6; 5; 6; 7; 6; 7	6; 5; 4; 6; 5; 6; 7; 6; 7	6; 5; 4; 6; 5; 6; 7; 6; 7	6	By MS/MS; By MS/MS; By MS/MS; By MS/MS; By MS/MS; By MS/MS; By MS/MS; By MS/MS; By MS/MS	19.1; 16.9; 13.2; 21.3; 17.9; 19.1; 22.1; 19.9; 25	21394; 40947; 30677; 50824; 50796; 61855; 39855; 57348; 44385	23943; 24602; 27209; 34483; 36711; 28473; 18479; 29671; 27205	4; 1; 6; 7; 4; 1; 8; 5; 9	5; 2; 6; 3; 6; 3; 6; 5; 6	5; 2; 6; 3; 6; 3; 6; 5; 6	5; 2; 6; 3; 6; 3; 6; 5; 6	5	By matching; By MS/MS; By matching; By MS/MS; By MS/MS; By MS/MS; By MS/MS; By matching; By MS/MS	16.9; 5.1; 18.9; 10.8; 19.9; 7.8; 17.6; 15; 18.1	19406; 15587; 21680; 20584; 46227; 22489; 60304; 35013; 22168	13983; 19079; 10777; 14308; 14921; 18722; 18667; 20085; 9400.5	0; 1; 0; 1; 1; 2; 2; 0; 4
all2705	0.000303469	0.454928	false	truth	0.46549	0.24284	0.141323	0.0253291	0.333929	0.621245	6; 5; 6; 5; 4; 2; 5; 6; 5	6; 5; 6; 5; 4; 2; 5; 6; 5	6; 5; 6; 5; 4; 2; 5; 6; 5	5	By MS/MS; By MS/MS; By MS/MS; By MS/MS; By MS/MS; By MS/MS; By MS/MS; By MS/MS; By MS/MS	15.9; 18.3; 16.1; 15.4; 12.7; 8.4; 18.3; 16.1; 15.4	33765; 20745; 18846; 7196.8; 30047; 39079; 55591; 42529; 39083	27426; 30505; 9769.3; 6335.1; 12393; 28351; 27336; 12871; 24770	6; 4; 10; 5; 1; 1; 7; 6; 3	5; 5; 3; 5; 4; 5; 6; 6; 3	5; 5; 3; 5; 4; 5; 6; 6; 3	5; 5; 3; 5; 4; 5; 6; 6; 3	5	By MS/MS; By MS/MS; By MS/MS; By MS/MS; By MS/MS; By MS/MS; By MS/MS; By MS/MS; By MS/MS	17.8; 15.4; 9.9; 12.7; 13.5; 16.1; 20.7; 24.8; 10.6	32095; 20694; 20757; 69174; 48076; 130400; 68559; 110420; 72204	30065; 32683; 38075; 40054; 27359; 64176; 59177; 57422; 49766	3; 4; 4; 4; 1; 6; 6; 3; 4
all0004	0.00750707	1	false	truth	1.59966	0.751488	0.437337	0.0481434	1.22507	2.13607	10; 9; 10; 8; 11; 9; 7; 9; 9	10; 9; 10; 8; 11; 9; 7; 9; 9	10; 9; 10; 8; 11; 9; 7; 9; 9	9	By MS/MS; By MS/MS; By MS/MS; By MS/MS; By MS/MS; By MS/MS; By MS/MS; By MS/MS; By MS/MS	39.7; 37.8; 40.3; 40.6; 43.8; 40; 28.3; 34.6; 33.3	75970; 81129; 80283; 62488; 131700; 178870; 88886; 88204; 45865	58024; 52687; 58777; 44628; 66536; 87048; 67267; 42424; 46346	19; 9; 17; 16; 12; 8; 13; 16; 10	8; 7; 7; 6; 7; 7; 11; 9; 10	8; 7; 7; 6; 7; 7; 11; 9; 10	8; 7; 7; 6; 7; 7; 11; 9; 10	7	By MS/MS; By MS/MS; By MS/MS; By MS/MS; By MS/MS; By MS/MS; By MS/MS; By MS/MS; By MS/MS	35.2; 28.9; 33; 25.4; 32.1; 31.7; 48.6; 41.3; 39.7	65519; 70120; 39120; 88014; 67321; 77453; 132980; 48440; 124460	45682; 43786; 27195; 34844; 21070; 30978; 55177; 25974; 54255	10; 10; 5; 7; 0; 8; 16; 3; 9
all0005	0.207527	1	false	truth	1.29912	0.74708	0.434772	0.047902	0.914137	1.81482	11; 10; 12; 12; 13; 16; 13; 13; 13	11; 10; 12; 12; 13; 16; 13; 13; 13	11; 10; 12; 12; 13; 16; 13; 13; 13	13	By MS/MS; By MS/MS; By MS/MS; By MS/MS; By MS/MS; By MS/MS; By MS/MS; By MS/MS; By MS/MS	31.4; 35.6; 34.6; 37.9; 40.3; 51.2; 41.1; 40.7; 44.7	403220; 295570; 457970; 224980; 508460; 1182000; 802410; 1277100; 1063500	245580; 251350; 247920; 291990; 307470; 453180; 647820; 708590; 568310	24; 21; 30; 63; 36; 17; 33; 43; 40	12; 11; 14; 12; 12; 12; 12; 11; 14	12; 11; 14; 12; 12; 12; 12; 11; 14	12; 11; 14; 12; 12; 12; 12; 11; 14	12	By MS/MS; By MS/MS; By MS/MS; By MS/MS; By MS/MS; By MS/MS; By MS/MS; By MS/MS; By MS/MS	37.9; 33.4; 45.3; 44.3; 40.3; 40.9; 44.7; 36.6; 47	265740; 169750; 345920; 613120; 839320; 756560; 720290; 785280; 1024400	209030; 156440; 159890; 379200; 444700; 359650; 403260; 464970; 415110	14; 23; 23; 22; 10; 24; 24; 11; 27
all0006	0.00902224	1	false	truth	1.42066	0.536502	0.312223	0.0363608	1.15172	1.79681	5; 5; 8; 7; 6; 7; 7; 4; 7	5; 5; 8; 7; 6; 7; 7; 4; 7	5; 5; 8; 7; 6; 7; 7; 4; 7	7	By MS/MS; By MS/MS; By MS/MS; By MS/MS; By MS/MS; By MS/MS; By MS/MS; By MS/MS; By MS/MS	36.1; 35.5; 38.8; 42.6; 42.6; 43.2; 43.2; 24.6; 42.6	128680; 93131; 158510; 182870; 199130; 223240; 162540; 75944; 205030	113130; 85524; 113670; 127290; 105990; 98325; 94520; 75645; 106340	12; 6; 19; 17; 8; 6; 14; 4; 18	7; 8; 6; 6; 5; 7; 6; 6; 5	7; 8; 6; 6; 5; 7; 6; 6; 5	7; 8; 6; 6; 5; 7; 6; 6; 5	6	By MS/MS; By MS/MS; By MS/MS; By MS/MS; By MS/MS; By MS/MS; By MS/MS; By MS/MS; By MS/MS	48.1; 49.2; 43.7; 37.2; 35.5; 56.8; 36.6; 36.1; 36.6	95874; 117140; 80609; 163170; 97624; 36556; 140410; 135220; 125360	67758; 97548; 70151; 75419; 81842; 24938; 98953; 70717; 80724	9; 11; 8; 7; 2; 9; 10; 3; 5
all0007	0.0878974	1	false	truth	1.62735	1.09686	0.652417	0.0504089	1.03867	2.38879	4; 3; 4; 3; 3; 3; 3; 3; 4	4; 3; 4; 3; 3; 3; 3; 3; 4	4; 3; 4; 3; 3; 3; 3; 3; 4	3	By MS/MS; By MS/MS; By MS/MS; By MS/MS; By MS/MS; By MS/MS; By MS/MS; By MS/MS; By MS/MS	33.7; 28.3; 33.7; 28.3; 28.3; 28.3; 28.3; 28.3; 33.7	15253; 37565; 18836; 32724; 27162; 37232; 66724; 83235; 102600	24807; 15736; 23614; 13243; 13582; 15065; 47162; 52531; 50162	8; 4; 7; 14; 9; 2; 13; 12; 12	3; 1; 2; 3; 3; 3; 2; 3; 3	3; 1; 2; 3; 3; 3; 2; 3; 3	3; 1; 2; 3; 3; 3; 2; 3; 3	3	By MS/MS; By matching; By matching; By MS/MS; By MS/MS; By MS/MS; By MS/MS; By MS/MS; By MS/MS	28.3; 8; 20.3; 28.3; 28.3; 28.3; 16; 28.3; 28.3	23262; 9293.8; 12483; 32891; 54501; 38676; 34667; 41209; 50020	10706; 12025; 0; 19790; 29611; 18445; 20384; 18862; 15398	3; 0; 0; 7; 3; 5; 12; 2; 4
all0008	0.86408	1	false	truth	0.884138	1.00968	#N/A	1.27386	#N/A	#N/A	2; 4; 2; 2; 2; 3; 1; 3; 3	2; 4; 2; 2; 2; 3; 1; 3; 3	2; 4; 2; 2; 2; 3; 1; 3; 3	2	By MS/MS; By MS/MS; By MS/MS; By MS/MS; By MS/MS; By MS/MS; By matching; By MS/MS; By MS/MS	17.8; 32.5; 17.2; 15.3; 19; 27; 9.2; 27; 27	8127.8; 33449; 18319; 226.54; 38435; 26782; 17611; 8672.9; 9202.2	13908; 35931; 0; 0; 38051; 9586.6; 0; 0; 0	3; 3; 2; 2; 2; 1; 0; 5; 3	3; 2; 3; 2; 1; 2; 2; 1; 3	3; 2; 3; 2; 1; 2; 2; 1; 3	3; 2; 3; 2; 1; 2; 2; 1; 3	2	By MS/MS; By MS/MS; By MS/MS; By MS/MS; By MS/MS; By MS/MS; By MS/MS; By matching; By MS/MS	27; 19; 27; 17.8; 8; 17.8; 17.2; 5.5; 17.8	14067; 1749.8; 55648; 11989; 0; 4737; 8982.6; 901.89; 12212	16381; 0; 55360; 9456; 0; 0; 0; 0; 0	2; 1; 1; 1; 1; 1; 2; 0; 2
all0010	0.0232587	1	false	truth	1.54022	0.659412	0.425253	0.0349985	1.15959	2.03256	2; 2; 3; 3; 3; 2; 3; 3; 3	2; 2; 3; 3; 3; 2; 3; 3; 3	2; 2; 3; 3; 3; 2; 3; 3; 3	3	By MS/MS; By MS/MS; By MS/MS; By MS/MS; By MS/MS; By MS/MS; By MS/MS; By MS/MS; By MS/MS	12.4; 12.4; 19.9; 19.9; 19.9; 13.1; 19.9; 12.7; 12.7	19475; 61819; 39891; 31239; 99914; 50015; 77222; 73043; 68373	20695; 45851; 24183; 53410; 54010; 0; 40380; 42462; 35472	2; 4; 2; 6; 3; 1; 2; 4; 5	1; 2; 2; 2; 1; 3; 2; 1; 1	1; 2; 2; 2; 1; 3; 2; 1; 1	1; 2; 2; 2; 1; 3; 2; 1; 1	2	By MS/MS; By MS/MS; By MS/MS; By MS/MS; By MS/MS; By MS/MS; By MS/MS; By matching; By MS/MS	5.6; 13.1; 13.1; 12.4; 5.6; 19.9; 13.1; 5.6; 5.6	24603; 29291; 29384; 96369; 68134; 57447; 53796; 13788; 40775	11689; 25759; 26917; 53544; 0; 25668; 31232; 0; 22050	2; 4; 2; 2; 1; 2; 3; 0; 2
all0070	0.260559	1	false	truth	1.28887	0.698975	0.517196	0.114352	0.881069	2.0295	3; 4; 3; 3; 3; 2; 2; 3; 2	3; 4; 3; 3; 3; 2; 2; 3; 2	3; 4; 3; 3; 3; 2; 2; 3; 2	3	By MS/MS; By MS/MS; By MS/MS; By MS/MS; By MS/MS; By MS/MS; By MS/MS; By MS/MS; By MS/MS	16.7; 23.7; 16.3; 16.7; 15.9; 11.5; 11.5; 16.7; 8.9	16062; 9912.8; 10478; 25369; 17872; 14006; 7925.9; 14330; 16002	19766; 0; 19056; 17672; 27413; 0; 0; 12513; 16012	2; 2; 1; 3; 2; 1; 1; 2; 1	3; 3; 4; 2; 2; 2; 2; 4; 2	3; 3; 4; 2; 2; 2; 2; 4; 2	3; 3; 4; 2; 2; 2; 2; 4; 2	2	By MS/MS; By MS/MS; By MS/MS; By MS/MS; By matching; By matching; By MS/MS; By matching; By MS/MS	16.7; 16.7; 16.3; 11.5; 11.5; 11.5; 13; 23.7; 8.9	28136; 9529.4; 29490; 19252; 15686; 8183; 21378; 16979; 2705.8	21969; 11142; 21557; 16404; 11245; 0; 9190; 0; 0	1; 2; 4; 2; 0; 0; 1; 0; 1
all0087	0.0330129	1	false	truth	1.54558	0.810877	0.514507	0.0717267	1.1178	2.21221	4; 6; 4; 8; 3; 7; 5; 7; 5	4; 6; 4; 8; 3; 7; 5; 7; 5	4; 6; 4; 8; 3; 7; 5; 7; 5	5	By MS/MS; By MS/MS; By MS/MS; By MS/MS; By matching; By MS/MS; By MS/MS; By MS/MS; By MS/MS	14.7; 19.9; 16.1; 27.7; 13.5; 24.5; 19.9; 23.1; 18.4	36777; 36717; 26636; 36829; 8302.2; 39846; 30051; 5570; 10562	15324; 16312; 15249; 20713; 13588; 15943; 27179; 7534.1; 29248	6; 3; 6; 10; 0; 0; 5; 3; 4	4; 4; 4; 3; 5; 7; 6; 4; 6	4; 4; 4; 3; 5; 7; 6; 4; 6	4; 4; 4; 3; 5; 7; 6; 4; 6	4	By MS/MS; By MS/MS; By MS/MS; By matching; By MS/MS; By MS/MS; By MS/MS; By matching; By MS/MS	16.1; 16.1; 15.6; 11.8; 19.6; 27.4; 23.1; 16.4; 21.9	21458; 5255.3; 7706.8; 9228; 18763; 14782; 33490; 16127; 27931	14422; 0; 0; 6150.3; 15958; 12634; 10610; 9118.2; 12686	1; 2; 1; 0; 2; 6; 2; 0; 2
all0089	0.213372	1	false	truth	1.44478	0.816099	#N/A	0.441775	#N/A	#N/A	0; 0; 1; 1; 2; 3; 1; 2; 2	0; 0; 1; 1; 2; 3; 1; 2; 2	0; 0; 1; 1; 2; 3; 1; 2; 2	1	By matching; By matching; By MS/MS; By MS/MS; By MS/MS; By MS/MS; By matching; By MS/MS; By matching	0; 0; 5.9; 5.9; 10; 24.9; 10; 15.8; 10	0; 0; 9421.8; 0; 17049; 21262; 12544; 9640.3; 3473.2	0; 0; 0; 0; 0; 21517; 0; 0; 0	0; 0; 1; 2; 1; 2; 0; 2; 0	1; 2; 2; 1; 3; 0; 3; 2; 1	1; 2; 2; 1; 3; 0; 3; 2; 1	1; 2; 2; 1; 3; 0; 3; 2; 1	2	By matching; By MS/MS; By matching; By matching; By matching; By matching; By MS/MS; By matching; By MS/MS	10; 15.8; 15.8; 10; 29; 0; 24.9; 19; 5.9	2251.4; 10398; 13310; 2727.2; 27654; 0; 30072; 23135; 0	0; 12117; 0; 0; 6744.2; 0; 34477; 16350; 0	0; 2; 0; 0; 0; 0; 3; 0; 1
all0107	0.0371771	1	false	truth	1.44487	0.750307	0.43665	0.0685646	1.08646	2.016	4; 4; 4; 4; 4; 4; 4; 4; 5	4; 4; 4; 4; 4; 4; 4; 4; 5	4; 4; 4; 4; 4; 4; 4; 4; 5	4	By MS/MS; By MS/MS; By MS/MS; By MS/MS; By MS/MS; By MS/MS; By MS/MS; By MS/MS; By MS/MS	30.8; 30.8; 30.8; 30.8; 30.8; 30.8; 30.8; 30.8; 35.5	256430; 156850; 177500; 337840; 319770; 333250; 397220; 566890; 499150	230580; 164280; 239910; 263700; 212220; 190040; 330550; 288830; 396430	12; 9; 8; 7; 9; 2; 11; 14; 14	4; 4; 4; 3; 5; 5; 4; 4; 3	4; 4; 4; 3; 5; 5; 4; 4; 3	4; 4; 4; 3; 5; 5; 4; 4; 3	4	By MS/MS; By MS/MS; By MS/MS; By MS/MS; By MS/MS; By MS/MS; By MS/MS; By MS/MS; By MS/MS	30.8; 30.8; 30.8; 20.3; 35.5; 35.5; 30.8; 30.8; 20.3	235800; 290710; 259920; 190400; 224050; 191230; 243790; 242860; 193010	296640; 222060; 201740; 162410; 101430; 93205; 147660; 186490; 199650	9; 8; 7; 4; 1; 6; 11; 4; 5
all0109	0.325305	1	false	truth	1.28076	0.955189	0.555883	0.118196	0.836078	2.06879	3; 3; 3; 4; 3; 4; 5; 3; 4	3; 3; 3; 4; 3; 4; 5; 3; 4	3; 3; 3; 4; 3; 4; 5; 3; 4	3	By MS/MS; By MS/MS; By MS/MS; By MS/MS; By MS/MS; By MS/MS; By MS/MS; By MS/MS; By MS/MS	23.2; 29.9; 23.2; 35.4; 23.2; 38.4; 42.7; 32.9; 45.1	432480; 486050; 358220; 350020; 491650; 340770; 554730; 522860; 535120	265830; 239280; 182220; 598580; 293220; 129140; 490880; 434420; 531800	10; 7; 8; 8; 8; 3; 10; 8; 13	3; 3; 3; 3; 2; 4; 2; 3; 3	3; 3; 3; 3; 2; 4; 2; 3; 3	3; 3; 3; 3; 2; 4; 2; 3; 3	3	By MS/MS; By MS/MS; By MS/MS; By MS/MS; By MS/MS; By MS/MS; By MS/MS; By MS/MS; By MS/MS	23.2; 23.2; 23.2; 23.2; 17.7; 35.4; 17.7; 23.2; 23.2	622860; 527090; 213710; 127450; 65648; 993990; 355800; 790040; 414060	396660; 363960; 284170; 78238; 20272; 440110; 332020; 441910; 138760	7; 8; 13; 2; 3; 5; 7; 4; 5
all0120	0.35962	1	false	truth	1.17078	0.571211	0.363089	0.0895315	0.888354	1.68347	2; 1; 2; 3; 2; 2; 0; 2; 2	2; 1; 2; 3; 2; 2; 0; 2; 2	2; 1; 2; 3; 2; 2; 0; 2; 2	2	By MS/MS; By matching; By MS/MS; By MS/MS; By MS/MS; By MS/MS; By matching; By MS/MS; By matching	10.8; 4.6; 11.1; 15.4; 10.8; 11.1; 0; 8.9; 10.8	20625; 2728; 15027; 28518; 13614; 21858; 0; 15324; 20074	14620; 0; 10766; 14730; 0; 13554; 0; 12959; 11610	1; 0; 2; 1; 2; 1; 0; 1; 0	2; 2; 2; 1; 2; 3; 2; 2; 2	2; 2; 2; 1; 2; 3; 2; 2; 2	2; 2; 2; 1; 2; 3; 2; 2; 2	2	By MS/MS; By MS/MS; By matching; By MS/MS; By MS/MS; By MS/MS; By MS/MS; By MS/MS; By MS/MS	10.8; 10.8; 10.2; 6.5; 10.8; 15.4; 11.1; 10.8; 10.8	10269; 16804; 4497.6; 14607; 6963.8; 31916; 22209; 13874; 23390	7414.9; 16811; 5994.6; 0; 3924.7; 19969; 14564; 8884.3; 15328	1; 1; 0; 1; 1; 2; 1; 1; 1
all0121	0.462243	1	false	truth	1.14536	0.489053	0.350221	0.0270246	0.820698	1.53365	4; 4; 1; 2; 7; 1; 2; 4; 5	4; 4; 1; 2; 7; 1; 2; 4; 5	4; 4; 1; 2; 7; 1; 2; 4; 5	4	By MS/MS; By MS/MS; By matching; By MS/MS; By MS/MS; By matching; By matching; By MS/MS; By MS/MS	12.2; 13.3; 3; 5.3; 21.5; 2.1; 7; 12.2; 13.3	24697; 21415; 11749; 20677; 22951; 2033.2; 10609; 23133; 30365	18830; 14985; 0; 24901; 15300; 0; 0; 14737; 33123	2; 2; 0; 3; 1; 0; 0; 2; 3	1; 4; 4; 5; 5; 2; 5; 5; 2	1; 4; 4; 5; 5; 2; 5; 5; 2	1; 4; 4; 5; 5; 2; 5; 5; 2	4	By MS/MS; By MS/MS; By matching; By MS/MS; By MS/MS; By MS/MS; By MS/MS; By matching; By MS/MS	3; 12.4; 12; 17.1; 14.8; 7; 15.4; 13.7; 6.3	0; 22467; 27895; 58405; 87936; 20391; 41462; 33047; 16254	0; 14348; 16910; 23743; 23131; 24306; 15821; 14903; 0	1; 1; 0; 3; 2; 2; 3; 0; 2
all0122	0.0441819	1	false	truth	0.835509	0.210134	0.12229	0.00758829	0.718975	0.96482	6; 7; 7; 6; 9; 11; 9; 9; 6	6; 7; 7; 6; 9; 11; 9; 9; 6	6; 7; 7; 6; 9; 11; 9; 9; 6	7	By MS/MS; By MS/MS; By MS/MS; By MS/MS; By MS/MS; By MS/MS; By MS/MS; By MS/MS; By MS/MS	25.7; 29.4; 27.8; 30.6; 42.8; 47.7; 37; 42.2; 27.8	46864; 88385; 103670; 94061; 158230; 162800; 133120; 77733; 74018	55587; 59976; 61917; 62332; 64938; 51181; 71404; 29443; 65875	8; 5; 12; 11; 5; 5; 10; 7; 5	8; 9; 5; 5; 6; 8; 5; 6; 9	8; 9; 5; 5; 6; 8; 5; 6; 9	8; 9; 5; 5; 6; 8; 5; 6; 9	6	By MS/MS; By MS/MS; By MS/MS; By MS/MS; By MS/MS; By MS/MS; By MS/MS; By MS/MS; By MS/MS	33.9; 42.8; 22.6; 21.4; 24.5; 34.3; 19.9; 26; 43.7	109080; 108920; 87982; 144110; 124090; 239280; 126880; 88898; 118720	52239; 60516; 72216; 76247; 62692; 91753; 82043; 74241; 78992	6; 8; 4; 5; 4; 11; 6; 3; 10
all0129	0.0963648	1	false	false	1.55817	0.504873	#N/A	0.298384	#N/A	#N/A	1; 1; 1; 2; 1; 0; 3; 1; 3	1; 1; 1; 2; 1; 0; 3; 1; 3	1; 1; 1; 2; 1; 0; 3; 1; 3	1	By MS/MS; By MS/MS; By MS/MS; By MS/MS; By matching; By matching; By MS/MS; By MS/MS; By MS/MS	6.1; 6.1; 6.1; 12.6; 7.3; 0; 17; 6.5; 19	3549.9; 3648; 4846.2; 27134; 543.24; 0; 30847; 0; 0	0; 0; 0; 0; 0; 0; 20397; 0; 0	0; 1; 1; 3; 0; 0; 3; 2; 4	0; 1; 2; 4; 1; 4; 2; 1; 1	0; 1; 2; 4; 1; 4; 2; 1; 1	0; 1; 2; 4; 1; 4; 2; 1; 1	1	By matching; By MS/MS; By MS/MS; By MS/MS; By MS/MS; By MS/MS; By MS/MS; By matching; By matching	0; 6.1; 13.4; 26.7; 9.7; 26.7; 12.6; 6.5; 6.1	0; 7950.3; 6061.8; 42385; 7581.9; 27545; 4382.2; 13968; 4782	0; 0; 8615.5; 13929; 0; 17511; 0; 0; 0	0; 1; 1; 3; 1; 3; 2; 0; 0
all0136	0.704589	1	false	truth	0.914296	0.576808	0.37143	0.0929711	0.606908	1.40911	6; 6; 7; 6; 3; 7; 6; 4; 4	6; 6; 7; 6; 3; 7; 6; 4; 4	6; 6; 7; 6; 3; 7; 6; 4; 4	6	By MS/MS; By MS/MS; By MS/MS; By MS/MS; By MS/MS; By MS/MS; By MS/MS; By MS/MS; By MS/MS	19.2; 22.4; 22.7; 18.7; 10.2; 27.7; 24.5; 16.6; 13.1	14861; 32317; 17813; 38061; 22051; 146070; 45011; 42164; 49389	0; 14875; 23515; 30244; 0; 50027; 28100; 36056; 38229	7; 5; 8; 11; 3; 3; 5; 6; 7	4; 6; 8; 5; 5; 5; 5; 3; 6	4; 6; 8; 5; 5; 5; 5; 3; 6	4; 6; 8; 5; 5; 5; 5; 3; 6	5	By MS/MS; By MS/MS; By MS/MS; By MS/MS; By MS/MS; By MS/MS; By MS/MS; By MS/MS; By MS/MS	16.6; 18.7; 27.1; 19.2; 18.4; 19.8; 16.3; 10.5; 18.7	11116; 19406; 83956; 109610; 22981; 77860; 88484; 26164; 59209	13910; 25924; 55668; 59657; 13210; 38195; 70440; 0; 27207	1; 1; 4; 6; 5; 8; 6; 2; 4
all0138	0.00340468	1	false	truth	1.33591	0.325155	0.189228	0.00968742	1.15838	1.53958	11; 12; 11; 11; 8; 9; 12; 10; 13	11; 12; 11; 11; 8; 9; 12; 10; 13	11; 12; 11; 11; 8; 9; 12; 10; 13	11	By MS/MS; By MS/MS; By MS/MS; By MS/MS; By MS/MS; By MS/MS; By MS/MS; By MS/MS; By MS/MS	25; 26.1; 25.9; 25; 11; 16.7; 18.1; 22; 29.1	417610; 429870; 479500; 424740; 493390; 362220; 321290; 402670; 377590	312610; 292630; 324680; 246170; 209670; 197900; 332240; 304800; 248070	31; 35; 35; 46; 29; 9; 26; 26; 31	10; 9; 8; 10; 8; 10; 8; 8; 9	10; 9; 8; 10; 8; 10; 8; 8; 9	10; 9; 8; 10; 8; 10; 8; 8; 9	9	By MS/MS; By MS/MS; By MS/MS; By MS/MS; By MS/MS; By MS/MS; By MS/MS; By MS/MS; By MS/MS	22; 18.1; 16.7; 20.8; 18.9; 20.6; 16.7; 21.8; 20.6	300850; 574600; 250210; 509190; 421750; 399400; 361720; 354380; 339230	204900; 233590; 182140; 252110; 229760; 196250; 184270; 208780; 211160	31; 28; 31; 21; 12; 21; 21; 9; 18
all0147	0.289029	1	false	truth	1.55392	1.39801	1.23435	0.565681	0.820252	6.33541	2; 2; 2; 2; 2; 1; 3; 2; 2	2; 2; 2; 2; 2; 1; 3; 2; 2	2; 2; 2; 2; 2; 1; 3; 2; 2	2	By MS/MS; By MS/MS; By MS/MS; By MS/MS; By MS/MS; By MS/MS; By MS/MS; By MS/MS; By MS/MS	18.5; 18.5; 18.5; 18.5; 18.5; 10.8; 44.6; 18.5; 18.5	12936; 27148; 22388; 41055; 10328; 35821; 21556; 48010; 25979	0; 17599; 20002; 25226; 0; 19538; 15674; 38255; 22940	3; 3; 2; 5; 1; 1; 4; 2; 3	1; 1; 2; 2; 2; 2; 2; 1; 2	1; 1; 2; 2; 2; 2; 2; 1; 2	1; 1; 2; 2; 2; 2; 2; 1; 2	2	By matching; By matching; By matching; By MS/MS; By MS/MS; By MS/MS; By MS/MS; By MS/MS; By MS/MS	7.7; 10.8; 18.5; 18.5; 18.5; 18.5; 18.5; 10.8; 18.5	7007.6; 9547.5; 7207.4; 51317; 51966; 16279; 2537.5; 19393; 19330	0; 0; 1760.3; 26797; 27570; 0; 0; 0; 8249	0; 0; 0; 1; 2; 2; 2; 0; 1
all0152	0.25142	1	false	truth	1.25517	0.587859	0.396006	0.0321192	0.892155	1.7015	4; 4; 3; 4; 1; 7; 5; 3; 5	4; 4; 3; 4; 1; 7; 5; 3; 5	4; 4; 3; 4; 1; 7; 5; 3; 5	4	By MS/MS; By MS/MS; By MS/MS; By MS/MS; By MS/MS; By MS/MS; By MS/MS; By MS/MS; By MS/MS	12.8; 12.6; 12.3; 14.2; 2.9; 31.3; 24.3; 8.3; 23	18694; 39991; 13563; 49486; 11691; 86732; 29007; 7776.9; 31815	17932; 27231; 11155; 34659; 0; 34588; 26696; 0; 18284	2; 1; 4; 5; 1; 2; 4; 2; 2	4; 1; 3; 3; 8; 6; 4; 2; 4	4; 1; 3; 3; 8; 6; 4; 2; 4	4; 1; 3; 3; 8; 6; 4; 2; 4	4	By matching; By matching; By matching; By MS/MS; By MS/MS; By MS/MS; By MS/MS; By MS/MS; By MS/MS	13.4; 3.7; 12.6; 10.7; 32.9; 23.3; 13.9; 6.1; 12	25182; 9154.6; 20310; 2197.4; 39797; 10546; 23358; 8483.1; 11818	11936; 0; 12812; 0; 20630; 18359; 22234; 24663; 24566	0; 0; 0; 2; 3; 4; 3; 0; 1
all0233	0.119004	1	false	truth	1.35128	0.772703	1.25036	0.0985521	0.173815	2.82421	1; 2; 0; 2; 2; 0; 2; 2; 1	1; 2; 0; 2; 2; 0; 2; 2; 1	1; 2; 0; 2; 2; 0; 2; 2; 1	2	By MS/MS; By matching; By matching; By MS/MS; By MS/MS; By matching; By MS/MS; By MS/MS; By MS/MS	1.7; 7.2; 0; 5.3; 5.3; 0; 5.3; 7.2; 3.6	3946.2; 9659.9; 0; 11228; 13016; 0; 2210.4; 4871.2; 7580.3	0; 0; 0; 8504.8; 17374; 0; 0; 0; 0	1; 0; 0; 1; 1; 0; 1; 1; 1	1; 2; 2; 3; 1; 1; 3; 4; 4	1; 2; 2; 3; 1; 1; 3; 4; 4	1; 2; 2; 3; 1; 1; 3; 4; 4	2	By matching; By matching; By matching; By MS/MS; By MS/MS; By matching; By MS/MS; By MS/MS; By MS/MS	3.6; 3.6; 5.3; 8.9; 3.6; 3.6; 8.9; 12.8; 8.9	1908.2; 8624.1; 19925; 23246; 15741; 3688.5; 16435; 14456; 9536.3	0; 0; 0; 10671; 0; 0; 13361; 0; 10781	0; 0; 0; 0; 0; 0; 2; 1; 2
all0258	0.268544	1	false	truth	0.822794	0.396143	0.23054	0.0557904	0.629227	1.11359	4; 3; 5; 4; 2; 4; 4; 4; 5	4; 3; 5; 4; 2; 4; 4; 4; 5	4; 3; 5; 4; 2; 4; 4; 4; 5	4	By MS/MS; By MS/MS; By MS/MS; By MS/MS; By MS/MS; By MS/MS; By MS/MS; By MS/MS; By MS/MS	51.1; 44.6; 51.1; 44.6; 22.3; 28.8; 51.1; 44.6; 51.1	990580; 1281100; 784700; 331550; 514300; 602580; 484310; 414750; 724330	527980; 673370; 547140; 262790; 436340; 297930; 476180; 385320; 476240	24; 21; 18; 24; 19; 8; 11; 14; 11	3; 4; 3; 3; 4; 3; 5; 5; 4	3; 4; 3; 3; 4; 3; 5; 5; 4	3; 4; 3; 3; 4; 3; 5; 5; 4	4	By MS/MS; By MS/MS; By MS/MS; By MS/MS; By MS/MS; By MS/MS; By MS/MS; By MS/MS; By MS/MS	44.6; 51.1; 28.8; 44.6; 44.6; 44.6; 51.1; 51.1; 28.8	1201100; 596440; 532390; 490100; 460250; 1004000; 1737100; 1823700; 1290800	673490; 418090; 423110; 428290; 197600; 579890; 769820; 816270; 793490	14; 13; 15; 9; 13; 8; 12; 7; 9
all0259	0.574632	1	false	truth	1.0722	0.39408	0.229339	0.0284389	0.868809	1.33837	7; 6; 7; 6; 8; 7; 6; 6; 7	7; 6; 7; 6; 8; 7; 6; 6; 7	7; 6; 7; 6; 8; 7; 6; 6; 7	7	By MS/MS; By MS/MS; By MS/MS; By MS/MS; By MS/MS; By MS/MS; By MS/MS; By MS/MS; By MS/MS	57.1; 51.5; 57.1; 45.4; 57.1; 57.1; 51.5; 51.5; 57.1	531080; 440520; 510290; 573490; 598390; 690620; 951510; 879490; 1058900	352680; 333990; 324790; 380280; 413920; 380490; 595010; 507330; 615560	19; 13; 15; 16; 15; 12; 23; 18; 22	6; 7; 6; 7; 4; 6; 6; 7; 5	6; 7; 6; 7; 4; 6; 6; 7; 5	6; 7; 6; 7; 4; 6; 6; 7; 5	6	By MS/MS; By MS/MS; By MS/MS; By MS/MS; By MS/MS; By MS/MS; By MS/MS; By MS/MS; By MS/MS	51.5; 57.1; 51.5; 57.1; 33.1; 51.5; 51.5; 57.1; 51.5	514310; 458930; 323740; 588640; 676240; 890110; 940280; 952370; 766350	395270; 361710; 337520; 238900; 332150; 408660; 563060; 579430; 500320	17; 19; 24; 10; 13; 15; 22; 12; 16
all0322	0.127581	1	false	truth	3.30858	2.71345	2.47452	0.021929	0.879552	5.88597	3; 6; 3; 4; 1; 4; 1; 2; 0	3; 6; 3; 4; 1; 4; 1; 2; 0	3; 6; 3; 4; 1; 4; 1; 2; 0	3	By MS/MS; By MS/MS; By MS/MS; By MS/MS; By matching; By matching; By MS/MS; By MS/MS; By matching	12.6; 26.5; 12.6; 16; 3.7; 15.2; 3.7; 8.9; 0	32270; 69513; 28042; 9407.8; 4928.3; 19206; 0; 4646.8; 0	35970; 40290; 11359; 7031.1; 0; 4036.6; 0; 0; 0	4; 7; 3; 4; 0; 0; 1; 1; 0	2; 2; 1; 3; 2; 3; 0; 0; 1	2; 2; 1; 3; 2; 3; 0; 0; 1	2; 2; 1; 3; 2; 3; 0; 0; 1	2	By MS/MS; By MS/MS; By MS/MS; By MS/MS; By matching; By MS/MS; By matching; By matching; By matching	8.9; 7.1; 3.4; 14.7; 7.1; 12.6; 0; 0; 5.5	7132.2; 9647.5; 18030; 12346; 9387; 10770; 0; 0; 3190.2	0; 0; 0; 7769.7; 0; 6950.8; 0; 0; 0	2; 1; 1; 2; 0; 3; 0; 0; 0
all0329	0.86923	1	false	truth	0.982686	0.304176	0.177018	0.0262335	0.82783	1.19049	6; 5; 6; 7; 5; 5; 6; 6; 7	6; 5; 6; 7; 5; 5; 6; 6; 7	6; 5; 6; 7; 5; 5; 6; 6; 7	6	By MS/MS; By MS/MS; By MS/MS; By MS/MS; By MS/MS; By MS/MS; By MS/MS; By MS/MS; By MS/MS	57.6; 51.1; 57.6; 66.2; 51.1; 51.1; 59.7; 59.7; 70.5	1093400; 1043300; 1083900; 963280; 1081200; 1450400; 602830; 1175000; 1087900	690270; 620900; 675670; 641760; 617800; 632680; 530350; 670990; 598150	35; 21; 23; 29; 15; 11; 16; 21; 30	6; 5; 7; 7; 5; 5; 6; 6; 6	6; 5; 7; 7; 5; 5; 6; 6; 6	6; 5; 7; 7; 5; 5; 6; 6; 6	6	By MS/MS; By MS/MS; By MS/MS; By MS/MS; By MS/MS; By MS/MS; By MS/MS; By MS/MS; By MS/MS	57.6; 51.1; 61.9; 66.2; 51.1; 51.1; 59.7; 59.7; 59.7	925200; 979150; 838740; 674320; 1111900; 1407200; 1538200; 1504100; 1647000	580350; 625580; 549760; 406990; 593750; 755070; 760410; 754200; 913250	21; 22; 20; 10; 8; 20; 22; 15; 20
all0405	0.158686	1	false	truth	1.33145	0.698602	0.470608	0.0871525	0.949867	1.96727	1; 1; 1; 1; 2; 2; 1; 1; 4	1; 1; 1; 1; 2; 2; 1; 1; 4	1; 1; 1; 1; 2; 2; 1; 1; 4	1	By MS/MS; By MS/MS; By MS/MS; By MS/MS; By MS/MS; By MS/MS; By MS/MS; By MS/MS; By MS/MS	2.5; 2.5; 2.5; 2.5; 6.1; 6.1; 2.5; 2.5; 10.4	646300; 644630; 701590; 715250; 521590; 1283800; 721190; 543200; 1176700	399190; 386540; 414130; 384330; 393430; 0; 342980; 0; 702730	3; 2; 5; 6; 2; 3; 4; 1; 6	2; 1; 1; 1; 1; 2; 3; 4; 3	2; 1; 1; 1; 1; 2; 3; 4; 3	2; 1; 1; 1; 1; 2; 3; 4; 3	2	By MS/MS; By MS/MS; By MS/MS; By MS/MS; By MS/MS; By MS/MS; By MS/MS; By MS/MS; By MS/MS	4.3; 2.5; 2.5; 2.5; 2.5; 4; 6.4; 10.8; 7.1	534050; 493230; 435320; 376260; 431140; 1090400; 1116000; 1054300; 981310	336320; 312280; 305760; 47710; 0; 0; 490530; 315330; 441600	1; 2; 2; 2; 2; 3; 6; 1; 5
all0437	0.452065	1	false	truth	1.1277	0.506938	0.315679	0.0583053	0.864812	1.53024	1; 2; 4; 2; 3; 3; 2; 2; 3	1; 2; 4; 2; 3; 3; 2; 2; 3	1; 2; 4; 2; 3; 3; 2; 2; 3	2	By MS/MS; By MS/MS; By MS/MS; By MS/MS; By MS/MS; By MS/MS; By MS/MS; By MS/MS; By MS/MS	19.8; 32.7; 53.5; 32.7; 41.6; 41.6; 28.7; 32.7; 41.6	19077; 20191; 11122; 19007; 28373; 45881; 27522; 19181; 12877	16049; 16617; 15960; 12464; 8611.3; 17538; 23213; 0; 18284	3; 2; 5; 3; 3; 4; 3; 8; 4	2; 1; 2; 2; 2; 1; 3; 3; 3	2; 1; 2; 2; 2; 1; 3; 3; 3	2; 1; 2; 2; 2; 1; 3; 3; 3	2	By MS/MS; By MS/MS; By MS/MS; By MS/MS; By MS/MS; By MS/MS; By MS/MS; By MS/MS; By MS/MS	32.7; 19.8; 32.7; 32.7; 32.7; 19.8; 41.6; 41.6; 41.6	11662; 7915.3; 22828; 14777; 22558; 33713; 19035; 27672; 48281	9068.4; 0; 21448; 9746.9; 9426.5; 17325; 14523; 15354; 19696	4; 2; 2; 4; 5; 3; 11; 1; 4
all0459	0.0247929	1	false	truth	0.491586	0.298606	0.258617	0.0594174	0.254178	0.791102	1; 2; 0; 2; 0; 2; 1; 2; 2	1; 2; 0; 2; 0; 2; 1; 2; 2	1; 2; 0; 2; 0; 2; 1; 2; 2	2	By MS/MS; By MS/MS; By matching; By matching; By matching; By matching; By matching; By matching; By matching	13.4; 30.3; 0; 30.3; 0; 30.3; 17.6; 31.1; 17.6	0; 6303.9; 0; 5533.1; 0; 17803; 4578; 14749; 2889.8	0; 8547.3; 0; 7277.8; 0; 13598; 0; 5242.7; 3536.5	1; 1; 0; 0; 0; 0; 0; 0; 0	1; 2; 2; 1; 1; 2; 1; 0; 1	1; 2; 2; 1; 1; 2; 1; 0; 1	1; 2; 2; 1; 1; 2; 1; 0; 1	1	By MS/MS; By matching; By MS/MS; By MS/MS; By MS/MS; By MS/MS; By matching; By matching; By matching	13.4; 30.3; 30.3; 17.6; 17.6; 31.1; 16.8; 0; 13.4	5591.1; 8100.4; 32497; 0; 29946; 45749; 2438.9; 0; 3810.6	0; 11726; 19189; 0; 11192; 20548; 0; 0; 0	1; 0; 1; 1; 0; 2; 0; 0; 0
all0579	0.155109	1	false	truth	1.53794	1.17645	0.815649	0.195706	0.928694	2.89563	3; 1; 3; 4; 4; 3; 2; 2; 2	3; 1; 3; 4; 4; 3; 2; 2; 2	3; 1; 3; 4; 4; 3; 2; 2; 2	3	By MS/MS; By MS/MS; By MS/MS; By MS/MS; By MS/MS; By MS/MS; By MS/MS; By MS/MS; By MS/MS	27; 11.8; 27; 48; 36.8; 30.9; 22.4; 22.4; 22.4	28813; 29370; 25988; 73413; 52135; 113010; 94134; 57862; 68540	21069; 0; 21850; 58717; 29887; 72978; 50859; 63463; 36606	1; 1; 1; 4; 2; 3; 2; 5; 5	1; 3; 3; 1; 1; 2; 2; 1; 2	1; 3; 3; 1; 1; 2; 2; 1; 2	1; 3; 3; 1; 1; 2; 2; 1; 2	2	By MS/MS; By MS/MS; By MS/MS; By MS/MS; By MS/MS; By MS/MS; By MS/MS; By MS/MS; By MS/MS	11.8; 27; 23.7; 11.8; 11.8; 22.4; 17.8; 11.8; 22.4	10308; 20191; 14888; 82833; 122840; 64727; 64765; 41178; 38181	0; 18967; 23038; 0; 59411; 32106; 31156; 0; 12121	1; 1; 2; 1; 1; 1; 2; 1; 2
all0646	0.0332358	1	false	truth	0.39533	0.167593	#N/A	0.163356	#N/A	#N/A	2; 0; 3; 1; 1; 1; 4; 2; 3	2; 0; 3; 1; 1; 1; 4; 2; 3	2; 0; 3; 1; 1; 1; 4; 2; 3	2	By MS/MS; By matching; By MS/MS; By matching; By MS/MS; By matching; By MS/MS; By MS/MS; By MS/MS	13.3; 0; 20.6; 5.2; 6.9; 6.9; 20.6; 13.3; 21.5	0; 0; 12747; 2197.4; 0; 0; 6439; 5773.2; 20029	0; 0; 0; 0; 0; 0; 3874.6; 0; 0	1; 0; 1; 0; 0; 0; 2; 0; 0	2; 2; 1; 3; 4; 3; 5; 3; 3	2; 2; 1; 3; 4; 3; 5; 3; 3	2; 2; 1; 3; 4; 3; 5; 3; 3	3	By matching; By matching; By matching; By MS/MS; By MS/MS; By MS/MS; By MS/MS; By MS/MS; By matching	12.4; 13.3; 6.9; 20.2; 20.6; 13.3; 21.5; 13.3; 21.5	7035.8; 13107; 0; 27974; 8614.6; 16348; 5499.2; 9762.2; 18845	0; 0; 0; 19986; 7133.2; 10685; 4554; 8339.8; 0	0; 0; 0; 2; 0; 1; 3; 0; 0
all0650	0.977689	1	false	truth	1.00677	0.563022	0.426632	0.0647464	0.629848	1.5231	3; 2; 4; 4; 2; 4; 3; 3; 3	3; 2; 4; 4; 2; 4; 3; 3; 3	3; 2; 4; 3; 1; 3; 3; 3; 2	3	By MS/MS; By matching; By MS/MS; By MS/MS; By MS/MS; By matching; By MS/MS; By MS/MS; By MS/MS	16.4; 10.7; 19.9; 17.4; 7.6; 17.4; 13.6; 13.6; 11.7	48854; 37979; 17294; 43478; 31773; 32706; 14924; 25385; 27266	0; 0; 0; 28311; 18238; 9518.2; 0; 12211; 15294	2; 0; 3; 6; 1; 0; 1; 3; 2	2; 4; 3; 3; 2; 2; 2; 2; 2	2; 4; 3; 3; 2; 2; 2; 2; 2	1; 3; 2; 3; 2; 2; 2; 2; 2	2	By MS/MS; By MS/MS; By matching; By MS/MS; By matching; By MS/MS; By MS/MS; By MS/MS; By MS/MS	7.9; 17.4; 13.6; 13.6; 7.9; 7.9; 9.5; 9.8; 7.9	7934.6; 10261; 11768; 44486; 45253; 44515; 13814; 11640; 12299	13406; 11698; 17518; 26995; 26013; 21394; 0; 0; 7159	1; 1; 0; 2; 0; 2; 1; 0; 3
all0713	0.00964874	1	false	truth	0.609171	0.121931	0.150075	0.0148937	0.466895	0.769866	5; 4; 4; 4; 4; 4; 2; 4; 3	5; 4; 4; 4; 4; 4; 2; 4; 3	5; 4; 4; 4; 4; 4; 2; 4; 3	4	By MS/MS; By MS/MS; By MS/MS; By MS/MS; By MS/MS; By matching; By MS/MS; By MS/MS; By MS/MS	10.6; 5.6; 7.2; 8.2; 8.9; 7.2; 3.4; 6.7; 6	21263; 48642; 8151.6; 37860; 33693; 72107; 2184.7; 9603.5; 4356.8	0; 23884; 0; 15330; 0; 16278; 0; 0; 0	2; 1; 2; 2; 2; 0; 1; 1; 2	6; 0; 2; 2; 2; 4; 1; 1; 3	6; 0; 2; 2; 2; 4; 1; 1; 3	6; 0; 2; 2; 2; 4; 1; 1; 3	2	By MS/MS; By matching; By matching; By matching; By MS/MS; By MS/MS; By matching; By matching; By MS/MS	10.7; 0; 2.7; 4.2; 3.8; 7.3; 1.6; 1.2; 5.9	38109; 0; 93262; 13093; 16502; 49861; 3423.5; 1117.3; 17323	27330; 0; 0; 0; 24710; 36110; 0; 0; 0	2; 0; 0; 0; 1; 3; 0; 0; 2
all0723	0.45552	1	false	truth	0.886481	0.240066	0.260701	0.0801632	0.681149	1.24633	2; 2; 1; 2; 2; 2; 2; 1; 0	2; 2; 1; 2; 2; 2; 2; 1; 0	2; 2; 1; 2; 2; 2; 2; 1; 0	2	By MS/MS; By matching; By MS/MS; By MS/MS; By matching; By MS/MS; By MS/MS; By matching; By matching	8.3; 5.8; 3; 6.3; 9.4; 6.1; 5.8; 3; 0	5265.4; 21998; 20679; 16895; 10606; 30044; 9148; 9210.7; 0	0; 16623; 0; 0; 0; 15027; 0; 0; 0	1; 0; 1; 3; 0; 0; 2; 0; 0	2; 0; 2; 1; 4; 3; 4; 1; 2	2; 0; 2; 1; 4; 3; 4; 1; 2	2; 0; 2; 1; 4; 3; 4; 1; 2	2	By matching; By matching; By MS/MS; By MS/MS; By MS/MS; By MS/MS; By MS/MS; By matching; By MS/MS	6.6; 0; 8.3; 3; 17.6; 11; 16.3; 5.2; 5.8	17435; 0; 13371; 32512; 49724; 36092; 22832; 2306.3; 11187	0; 0; 16976; 0; 20549; 21979; 13421; 0; 0	0; 0; 1; 1; 1; 2; 2; 0; 2
all0737	0.0240513	1	false	truth	0.459229	0.222716	0.199238	0.091332	0.29134	0.719434	2; 2; 2; 0; 2; 2; 3; 0; 1	2; 2; 2; 0; 2; 2; 3; 0; 1	2; 2; 2; 0; 2; 2; 3; 0; 1	2	By MS/MS; By matching; By matching; By matching; By matching; By MS/MS; By MS/MS; By matching; By matching	5.8; 4.6; 7.9; 0; 7.9; 6.4; 11.2; 0; 4.8	6636.3; 3252.4; 8244; 0; 3545.6; 7894.7; 6134.3; 0; 4358	15037; 0; 7821.2; 0; 6989.1; 12877; 0; 0; 0	1; 0; 0; 0; 0; 0; 1; 0; 0	4; 2; 1; 5; 2; 6; 5; 4; 1	4; 2; 1; 5; 2; 6; 5; 4; 1	4; 2; 1; 5; 2; 6; 5; 4; 1	4	By MS/MS; By MS/MS; By MS/MS; By MS/MS; By MS/MS; By MS/MS; By MS/MS; By MS/MS; By MS/MS	12; 4.1; 2.7; 18; 4.6; 19.5; 15.7; 12; 2.7	39968; 22774; 25789; 47942; 14041; 73351; 45531; 51989; 14982	32383; 0; 0; 17649; 0; 27691; 31607; 23461; 0	2; 2; 1; 7; 4; 14; 6; 1; 1
all0747	0.246951	1	false	truth	0.87073	0.219496	0.236156	0.0369683	0.661198	1.14711	3; 3; 2; 3; 2; 1; 2; 1; 1	3; 3; 2; 3; 2; 1; 2; 1; 1	3; 3; 2; 3; 2; 1; 2; 1; 1	2	By MS/MS; By MS/MS; By MS/MS; By MS/MS; By matching; By matching; By MS/MS; By matching; By MS/MS	10.2; 12.8; 6.8; 11.6; 6.2; 3.4; 8.8; 4; 3.4	15170; 14816; 5248; 36597; 25054; 16145; 12285; 5398.2; 13654	0; 0; 0; 24619; 19123; 0; 0; 0; 0	2; 2; 2; 4; 0; 0; 2; 0; 2	3; 3; 3; 2; 3; 2; 2; 2; 3	3; 3; 3; 2; 3; 2; 2; 2; 3	3; 3; 3; 2; 3; 2; 2; 2; 3	3	By MS/MS; By MS/MS; By MS/MS; By MS/MS; By matching; By MS/MS; By MS/MS; By MS/MS; By MS/MS	12.8; 11.6; 12.8; 9.4; 12.8; 7.4; 6.2; 6.2; 15.1	26451; 33268; 11518; 24225; 78966; 43185; 33473; 31214; 9306.4	17629; 25480; 0; 0; 32116; 0; 30486; 24113; 0	3; 4; 1; 1; 0; 2; 3; 1; 1
all0860	0.00968406	1	false	truth	0.596744	0.244871	0.176647	0.0349777	0.437257	0.79949	5; 1; 2; 2; 3; 2; 2; 4; 5	5; 1; 2; 2; 3; 2; 2; 4; 5	5; 1; 2; 2; 3; 2; 2; 4; 5	2	By MS/MS; By matching; By MS/MS; By MS/MS; By MS/MS; By matching; By MS/MS; By MS/MS; By MS/MS	8.4; 1.6; 3.1; 3; 4.9; 3.1; 1.6; 5.7; 8.7	26771; 119.29; 7631.8; 8585; 19236; 11629; 471.62; 13861; 14123	12157; 0; 0; 0; 13587; 11008; 0; 14968; 6823	1; 0; 1; 3; 2; 0; 2; 1; 2	2; 4; 6; 6; 4; 6; 8; 6; 7	2; 4; 6; 6; 4; 6; 8; 6; 7	2; 4; 6; 6; 4; 6; 8; 6; 7	6	By MS/MS; By MS/MS; By MS/MS; By MS/MS; By MS/MS; By MS/MS; By MS/MS; By MS/MS; By MS/MS	2.9; 5.2; 11.1; 8.3; 6.8; 8.3; 11.7; 10.1; 8.9	17189; 14314; 39244; 61473; 53177; 79697; 21554; 59647; 54551	14450; 0; 17031; 31378; 26052; 33172; 14337; 18835; 17803	1; 4; 2; 3; 2; 6; 4; 0; 3
all0865	0.0125872	1	false	truth	1.41778	0.499634	0.290768	0.0195582	1.15105	1.74108	14; 10; 11; 12; 9; 10; 11; 12; 11	14; 10; 11; 12; 9; 10; 11; 12; 11	14; 10; 11; 12; 9; 10; 11; 12; 11	11	By MS/MS; By MS/MS; By MS/MS; By MS/MS; By MS/MS; By MS/MS; By MS/MS; By MS/MS; By MS/MS	34.4; 27.9; 31.5; 29; 26.5; 29.2; 34.8; 35; 34.2	386050; 281980; 407820; 498680; 333730; 361720; 468140; 487030; 501180	336200; 528130; 312470; 317220; 267160; 168380; 321090; 291420; 266210	26; 13; 26; 29; 13; 10; 33; 32; 33	10; 9; 9; 8; 7; 9; 10; 8; 10	10; 9; 9; 8; 7; 9; 10; 8; 10	10; 9; 9; 8; 7; 9; 10; 8; 10	9	By MS/MS; By MS/MS; By MS/MS; By MS/MS; By MS/MS; By MS/MS; By MS/MS; By MS/MS; By MS/MS	26.1; 26.5; 27.2; 23.2; 21.3; 26.3; 28.5; 24.1; 29	211220; 196990; 291530; 482510; 393950; 387300; 370570; 262590; 332040	286680; 202410; 254820; 219240; 194350; 222790; 223850; 179340; 225460	8; 14; 9; 9; 8; 16; 15; 6; 13
all0868	0.604602	1	false	truth	0.891023	0.563544	0.327961	0.0998385	0.630328	1.34937	9; 6; 8; 9; 6; 7; 7; 7; 9	9; 6; 8; 9; 6; 7; 7; 7; 9	6; 5; 5; 6; 5; 6; 4; 6; 6	6	By MS/MS; By MS/MS; By MS/MS; By MS/MS; By MS/MS; By MS/MS; By MS/MS; By MS/MS; By MS/MS	81.4; 66.7; 89.2; 81.4; 66.7; 77.5; 80.4; 77.5; 90.2	313370; 236680; 242540; 451620; 339630; 332880; 120690; 119510; 134680	173000; 169660; 184540; 319790; 211070; 175620; 139920; 153740; 135620	11; 6; 10; 49; 16; 5; 25; 19; 27	6; 10; 6; 8; 7; 6; 12; 7; 8	6; 10; 6; 8; 7; 6; 12; 7; 8	5; 7; 5; 6; 5; 5; 9; 5; 5	5	By MS/MS; By MS/MS; By MS/MS; By MS/MS; By MS/MS; By MS/MS; By MS/MS; By MS/MS; By MS/MS	66.7; 91.2; 66.7; 82.4; 82.4; 76.5; 92.2; 84.3; 81.4	459980; 401570; 211970; 143140; 128160; 491540; 254600; 482110; 499360	354350; 260130; 133480; 79467; 67903; 296210; 171630; 253980; 271090	14; 25; 10; 15; 6; 12; 14; 3; 9
all0875	0.134213	1	false	truth	0.446178	0.17492	#N/A	0.436823	#N/A	#N/A	2; 0; 1; 1; 0; 1; 1; 2; 0	2; 0; 1; 1; 0; 1; 1; 2; 0	2; 0; 1; 1; 0; 1; 1; 2; 0	1	By MS/MS; By matching; By matching; By matching; By matching; By matching; By matching; By matching; By matching	3.3; 0; 2.4; 3.1; 0; 2.2; 3.3; 5.4; 0	10485; 0; 4144.1; 4253.8; 0; 18141; 1161.9; 1759; 0	0; 0; 0; 0; 0; 0; 0; 2914.3; 0	0; 0; 0; 0; 0; 0; 0; 0; 0	2; 1; 1; 2; 1; 3; 1; 2; 2	2; 1; 1; 2; 1; 3; 1; 2; 2	2; 1; 1; 2; 1; 3; 1; 2; 2	2	By matching; By matching; By matching; By MS/MS; By MS/MS; By MS/MS; By matching; By matching; By MS/MS	3.3; 3.1; 2.2; 5.4; 3.3; 9.6; 4.5; 7.8; 7.6	7680.8; 8871; 3561.1; 16239; 7316.9; 10434; 2038.7; 4192.4; 6403	0; 0; 0; 10274; 8618.3; 0; 0; 4201.9; 0	0; 0; 0; 2; 4; 2; 0; 0; 1
all0888	0.144395	1	false	truth	2.03525	1.98838	1.93189	0.730281	0.897231	14.1944	2; 3; 2; 3; 2; 5; 3; 5; 2	2; 3; 2; 3; 2; 5; 3; 5; 2	2; 3; 2; 3; 2; 5; 3; 5; 2	3	By MS/MS; By MS/MS; By MS/MS; By MS/MS; By MS/MS; By MS/MS; By MS/MS; By MS/MS; By MS/MS	19.9; 28.8; 14; 28.8; 19.1; 40.7; 28.8; 40.7; 15.3	11805; 27559; 27275; 21415; 18834; 98104; 622.77; 22588; 2385.6	0; 10235; 23783; 0; 0; 25792; 0; 16867; 0	0; 4; 2; 6; 2; 3; 1; 2; 0	1; 3; 4; 4; 2; 4; 2; 2; 2	1; 3; 4; 4; 2; 4; 2; 2; 2	1; 3; 4; 4; 2; 4; 2; 2; 2	2	By MS/MS; By MS/MS; By MS/MS; By MS/MS; By MS/MS; By MS/MS; By MS/MS; By MS/MS; By MS/MS	8.9; 25; 30.9; 33.9; 19.9; 33.9; 19.1; 19.9; 19.9	8023; 8895.3; 9940.8; 8458.1; 10077; 29486; 0; 9210; 2734.4	0; 21202; 8259.1; 3951.9; 0; 6583.3; 0; 0; 0	1; 0; 2; 2; 1; 1; 1; 0; 0
all0980	0.583501	1	false	false	0.950135	0.133308	#N/A	#N/A	#N/A	#N/A	1; 1; 3; 3; 2; 0; 1; 0; 1	1; 1; 3; 3; 2; 0; 1; 0; 1	1; 1; 3; 3; 2; 0; 1; 0; 1	1	By MS/MS; By matching; By MS/MS; By MS/MS; By MS/MS; By matching; By matching; By matching; By MS/MS	4.1; 4.1; 9.3; 13.7; 8; 0; 3.8; 0; 4.1	8366.9; 7429.4; 13154; 15537; 14095; 0; 2101.7; 0; 7961.1	0; 0; 7623.7; 9519.4; 10414; 0; 0; 0; 0	2; 0; 1; 2; 2; 0; 0; 0; 1	1; 1; 0; 1; 2; 1; 2; 1; 0	1; 1; 0; 1; 2; 1; 2; 1; 0	1; 1; 0; 1; 2; 1; 2; 1; 0	1	By matching; By MS/MS; By matching; By matching; By MS/MS; By matching; By MS/MS; By matching; By matching	4.1; 4.1; 0; 3.8; 6.3; 2.2; 6.9; 2.2; 0	3974.1; 4057.3; 0; 2961; 18229; 1196.9; 0; 2050.2; 0	0; 0; 0; 0; 9495.9; 0; 0; 0; 0	0; 1; 0; 0; 1; 0; 2; 0; 0
all1027	0.483791	1	false	truth	1.1162	0.420323	0.661643	0.268761	0.650676	2.40222	2; 3; 2; 2; 1; 1; 3; 5; 2	2; 3; 2; 2; 1; 1; 3; 5; 2	2; 3; 2; 2; 1; 1; 3; 5; 2	2	By MS/MS; By MS/MS; By matching; By MS/MS; By MS/MS; By matching; By MS/MS; By MS/MS; By MS/MS	5.8; 10.2; 6.9; 4.9; 3.2; 2.5; 8.3; 15.5; 6.9	3314.8; 25516; 16702; 3491.6; 4857; 3669.9; 5422.3; 25565; 11178	0; 19634; 14056; 0; 0; 0; 0; 0; 24002	2; 1; 0; 1; 1; 0; 3; 1; 2	2; 1; 1; 1; 3; 6; 3; 2; 3	2; 1; 1; 1; 3; 6; 3; 2; 3	2; 1; 1; 1; 3; 6; 3; 2; 3	2	By MS/MS; By matching; By matching; By matching; By matching; By MS/MS; By MS/MS; By matching; By MS/MS	7.6; 2.5; 3.7; 3.7; 10.6; 20.6; 8.1; 8.1; 8.3	12624; 5228.9; 2594.1; 4934.8; 18768; 59403; 32868; 5290.8; 8510.8	18324; 0; 0; 0; 0; 14729; 0; 0; 0	1; 0; 0; 0; 0; 2; 1; 0; 1
all1053	0.88267	1	false	truth	0.969119	0.514354	0.360632	0.0776481	0.666438	1.43497	2; 3; 4; 4; 2; 2; 6; 5; 6	2; 3; 4; 4; 2; 2; 6; 5; 6	2; 3; 4; 4; 2; 2; 6; 5; 6	4	By MS/MS; By MS/MS; By MS/MS; By MS/MS; By matching; By MS/MS; By MS/MS; By MS/MS; By MS/MS	7; 10.5; 12.3; 14.6; 6.4; 7.6; 21.8; 17.9; 20.8	6760.2; 11315; 13737; 12498; 12255; 2134.2; 39629; 21663; 27529	13645; 0; 16163; 10176; 0; 0; 6401.7; 11700; 14335	2; 2; 2; 2; 0; 1; 4; 3; 3	7; 3; 3; 5; 4; 6; 6; 5; 6	7; 3; 3; 5; 4; 6; 6; 5; 6	7; 3; 3; 5; 4; 6; 6; 5; 6	5	By matching; By MS/MS; By MS/MS; By MS/MS; By MS/MS; By MS/MS; By MS/MS; By MS/MS; By MS/MS	23.9; 10.9; 10.5; 18.7; 13.8; 23; 23.7; 16.5; 23.9	44962; 10264; 14705; 27096; 20273; 25271; 37311; 37688; 12224	10845; 8178.2; 0; 7907.1; 13004; 19890; 11729; 21246; 0	0; 1; 2; 5; 3; 4; 6; 1; 7
all1140	0.804063	1	false	truth	0.931054	0.582998	0.4708	0.0663085	0.505478	1.48887	1; 2; 2; 4; 3; 1; 4; 2; 4	1; 2; 2; 4; 3; 1; 4; 2; 4	1; 2; 2; 4; 3; 1; 4; 2; 4	2	By MS/MS; By MS/MS; By MS/MS; By MS/MS; By MS/MS; By matching; By MS/MS; By MS/MS; By MS/MS	5.1; 12.8; 8; 20.1; 15; 7; 20.4; 6.7; 16.6	0; 77319; 2201.3; 69144; 54621; 7781; 17398; 5301.2; 9418.1	0; 0; 0; 25085; 19201; 0; 13142; 0; 8510.9	1; 2; 1; 2; 1; 0; 4; 5; 9	2; 2; 3; 4; 5; 4; 3; 1; 3	2; 2; 3; 4; 5; 4; 3; 1; 3	2; 2; 3; 4; 5; 4; 3; 1; 3	3	By MS/MS; By matching; By MS/MS; By MS/MS; By MS/MS; By MS/MS; By MS/MS; By MS/MS; By MS/MS	12.1; 9.3; 15; 16; 23; 18.8; 13.1; 7; 14.4	11606; 12584; 28474; 67413; 45142; 30999; 15105; 14227; 21591	14330; 19269; 22495; 42284; 18069; 7910.5; 13541; 0; 12612	1; 0; 1; 4; 2; 4; 4; 1; 1
all1237	0.49763	1	false	truth	1.21836	0.655346	#N/A	#N/A	#N/A	#N/A	1; 1; 2; 2; 2; 2; 3; 2; 3	1; 1; 2; 2; 2; 2; 3; 2; 3	1; 1; 2; 2; 2; 2; 3; 2; 3	2	By MS/MS; By MS/MS; By matching; By matching; By matching; By matching; By MS/MS; By matching; By MS/MS	2.8; 2.8; 6.1; 6.3; 6.3; 5.8; 8.3; 6.3; 8.3	7974.8; 9021.4; 2825.8; 13827; 13849; 2075.7; 13893; 2040.2; 5885.2	0; 0; 0; 8623.7; 9501.7; 0; 5420.1; 3191.5; 3203.7	1; 0; 0; 0; 0; 0; 1; 0; 2	3; 1; 4; 2; 1; 2; 3; 0; 2	3; 1; 4; 2; 1; 2; 3; 0; 2	3; 1; 4; 2; 1; 2; 3; 0; 2	2	By matching; By matching; By matching; By MS/MS; By MS/MS; By MS/MS; By MS/MS; By matching; By MS/MS	7.6; 3.5; 9.9; 5.5; 3.5; 4.4; 7.4; 0; 5.1	8889.9; 1085.5; 15616; 995.07; 1827.6; 10004; 7875.5; 0; 0	0; 0; 0; 0; 0; 0; 5911.2; 0; 0	0; 0; 0; 1; 1; 1; 2; 0; 2
all1267; REV__all8540	0.047818	1	false	truth	1.53597	0.810239	0.545811	0.08146	1.08662	2.25775	4; 4; 6; 6; 4; 4; 6; 6; 8	4; 4; 6; 6; 4; 4; 6; 6; 8	4; 4; 6; 6; 4; 4; 6; 6; 8	6	By MS/MS; By MS/MS; By MS/MS; By MS/MS; By MS/MS; By MS/MS; By MS/MS; By MS/MS; By MS/MS	5.4; 8.1; 10.5; 10; 7.1; 8.6; 12.7; 11.8; 17.8	18384; 8584.1; 37967; 32796; 48364; 24912; 20049; 5090.5; 25602	17749; 0; 23806; 22214; 29545; 12004; 18957; 0; 17776	2; 2; 7; 7; 3; 3; 5; 5; 10	4; 3; 4; 5; 3; 3; 7; 1; 6	4; 3; 4; 5; 3; 3; 7; 1; 6	4; 3; 4; 5; 3; 3; 7; 1; 6	4	By MS/MS; By MS/MS; By matching; By MS/MS; By matching; By MS/MS; By MS/MS; By MS/MS; By MS/MS	6.6; 4.6; 7.4; 10.5; 6.6; 5.3; 13.8; 1.3; 10.5	25681; 19233; 14451; 22499; 10231; 20169; 36563; 16339; 29528	14827; 15699; 0; 4700.4; 10551; 10720; 20101; 0; 18293	2; 2; 0; 2; 0; 1; 8; 1; 9
all1272	0.086228	1	false	truth	0.451969	0.373704	0.259756	0.223114	0.259746	0.903792	6; 4; 4; 6; 5; 8; 5; 3; 4	6; 4; 4; 6; 5; 8; 5; 3; 4	6; 4; 4; 6; 5; 8; 5; 3; 4	5	By MS/MS; By MS/MS; By MS/MS; By MS/MS; By MS/MS; By MS/MS; By MS/MS; By MS/MS; By MS/MS	9.4; 7.6; 7.3; 12.3; 7.7; 11.9; 8; 4.3; 7.8	26003; 12176; 4051; 23952; 10066; 25612; 7804.4; 11049; 10597	23065; 10625; 0; 17253; 4207.5; 13778; 0; 15896; 0	4; 3; 1; 2; 1; 1; 1; 2; 2	3; 8; 5; 9; 7; 7; 9; 5; 11	3; 8; 5; 9; 7; 7; 9; 5; 11	3; 8; 5; 9; 7; 7; 9; 5; 11	7	By matching; By MS/MS; By MS/MS; By MS/MS; By MS/MS; By MS/MS; By MS/MS; By MS/MS; By MS/MS	5.5; 14.5; 8.2; 16.6; 11.9; 11.6; 15.9; 8; 19	8194.9; 26951; 18296; 31322; 91209; 80812; 65984; 22877; 84390	0; 16020; 14616; 17697; 64794; 50699; 20013; 0; 41401	0; 1; 0; 7; 2; 4; 10; 1; 6
all1291	0.235715	1	false	false	1.37237	0.53224	0.581	0.0730343	0.867428	2.09356	0; 1; 1; 1; 2; 1; 1; 3; 2	0; 1; 1; 1; 2; 1; 1; 3; 2	0; 1; 1; 1; 2; 1; 1; 3; 2	1	By matching; By matching; By MS/MS; By matching; By matching; By matching; By matching; By MS/MS; By MS/MS	0; 9.6; 9.6; 9.6; 18.5; 9.6; 9.6; 28.1; 18.5	0; 30551; 0; 17510; 26648; 11700; 7757.5; 18164; 11065	0; 0; 0; 0; 16088; 0; 0; 11633; 10383	0; 0; 1; 0; 0; 0; 0; 2; 1	1; 2; 1; 1; 1; 3; 3; 2; 1	1; 2; 1; 1; 1; 3; 3; 2; 1	1; 2; 1; 1; 1; 3; 3; 2; 1	1	By matching; By MS/MS; By MS/MS; By matching; By matching; By MS/MS; By MS/MS; By matching; By MS/MS	9.6; 19.2; 9.6; 9.6; 9.6; 28.1; 28.1; 18.5; 9.6	19870; 20096; 28182; 2039; 12807; 17349; 16153; 13647; 9198.1	0; 10872; 0; 0; 0; 12700; 11131; 6379.3; 0	0; 1; 1; 0; 0; 2; 1; 0; 1
all1338	0.276773	1	false	truth	1.27276	0.41103	0.611483	0.114858	0.76731	2.10852	2; 2; 4; 2; 2; 3; 3; 2; 1	2; 2; 4; 2; 2; 3; 3; 2; 1	2; 2; 4; 2; 2; 3; 3; 2; 1	2	By MS/MS; By MS/MS; By MS/MS; By MS/MS; By MS/MS; By MS/MS; By MS/MS; By MS/MS; By matching	3.8; 12.5; 15.6; 12.5; 7.8; 11.6; 13.5; 9.2; 3.5	5929.7; 3024.6; 3793.5; 29014; 27886; 34986; 49152; 61982; 52030	0; 0; 0; 0; 20208; 18271; 35559; 0; 0	1; 1; 3; 2; 1; 1; 3; 1; 0	1; 1; 1; 3; 2; 4; 1; 2; 1	1; 1; 1; 3; 2; 4; 1; 2; 1	1; 1; 1; 3; 2; 4; 1; 2; 1	1	By matching; By matching; By MS/MS; By MS/MS; By MS/MS; By MS/MS; By matching; By matching; By matching	3.5; 3.8; 3.5; 16.8; 7.8; 22.5; 3.5; 9.2; 3.5	4466.2; 2276.1; 0; 34602; 31766; 32116; 149940; 164070; 86280	0; 0; 0; 0; 20148; 18125; 0; 0; 0	0; 0; 1; 1; 1; 2; 0; 0; 0
all1351	0.0534148	1	false	truth	2.17094	1.57681	1.02564	0.0548942	1.23452	3.35954	5; 3; 7; 4; 4; 4; 6; 2; 3	5; 3; 7; 4; 4; 4; 6; 2; 3	5; 3; 7; 4; 4; 4; 6; 2; 3	4	By MS/MS; By MS/MS; By MS/MS; By MS/MS; By matching; By matching; By MS/MS; By MS/MS; By MS/MS	22.8; 22.8; 31.5; 22.8; 30.9; 33.6; 30.2; 11.4; 22.8	66837; 23381; 54456; 28859; 36785; 16211; 49125; 10111; 15607	30531; 30321; 42363; 4509.9; 36379; 8817.3; 23025; 0; 9400	1; 1; 3; 2; 0; 0; 7; 2; 3	2; 4; 2; 4; 3; 5; 3; 2; 4	2; 4; 2; 4; 3; 5; 3; 2; 4	2; 4; 2; 4; 3; 5; 3; 2; 4	3	By matching; By MS/MS; By matching; By MS/MS; By MS/MS; By MS/MS; By MS/MS; By MS/MS; By MS/MS	18.1; 11.4; 22.1; 33.6; 18.8; 34.2; 22.8; 22.8; 30.9	16027; 14459; 18644; 8819.4; 9829.4; 11317; 13319; 7125.6; 10611	0; 15356; 11967; 8965.4; 0; 9781.2; 11745; 0; 10136	0; 2; 0; 0; 0; 2; 1; 0; 1
all1353	0.169671	1	false	truth	1.3625	0.297972	#N/A	#N/A	#N/A	#N/A	2; 3; 2; 1; 2; 2; 2; 1; 2	2; 3; 2; 1; 2; 2; 2; 1; 2	2; 3; 2; 1; 2; 2; 2; 1; 2	2	By MS/MS; By MS/MS; By MS/MS; By MS/MS; By MS/MS; By matching; By MS/MS; By matching; By MS/MS	9.6; 16.7; 9.6; 3.9; 12.4; 11; 9.6; 7.1; 11	13950; 20509; 12852; 13437; 7785.2; 11209; 8207.4; 5253.1; 16581	12432; 9297.9; 7822.8; 0; 0; 0; 0; 0; 0	2; 1; 2; 3; 2; 0; 5; 0; 4	1; 2; 1; 1; 1; 1; 1; 1; 2	1; 2; 1; 1; 1; 1; 1; 1; 2	1; 2; 1; 1; 1; 1; 1; 1; 2	1	By matching; By MS/MS; By matching; By MS/MS; By matching; By MS/MS; By MS/MS; By matching; By MS/MS	3.9; 8.2; 3.9; 3.9; 3.9; 3.9; 3.9; 5.7; 9.6	6992.8; 6555.8; 2727.2; 8010.1; 5176.5; 6862.4; 3158; 2392.3; 5746.3	0; 0; 0; 0; 0; 0; 0; 0; 6653.8	0; 1; 0; 0; 0; 2; 2; 0; 1
all1355	0.556189	1	false	truth	0.724476	0.803685	0.636527	0.583801	0.324292	3.1571	3; 3; 2; 1; 1; 5; 2; 2; 5	3; 3; 2; 1; 1; 5; 2; 2; 5	3; 3; 2; 1; 1; 5; 2; 2; 5	2	By MS/MS; By MS/MS; By MS/MS; By MS/MS; By MS/MS; By MS/MS; By MS/MS; By MS/MS; By MS/MS	24.6; 24; 16.8; 7.8; 7.8; 36.5; 16.8; 32.3; 40.1	15908; 15072; 0; 0; 0; 53194; 5807.4; 5963.9; 19917	17035; 8965.3; 0; 0; 0; 26999; 0; 0; 23620	1; 1; 1; 0; 0; 3; 0; 0; 3	3; 2; 4; 1; 3; 4; 3; 4; 3	3; 2; 4; 1; 3; 4; 3; 4; 3	3; 2; 4; 1; 3; 4; 3; 4; 3	3	By MS/MS; By MS/MS; By MS/MS; By MS/MS; By MS/MS; By MS/MS; By MS/MS; By MS/MS; By MS/MS	24; 16.8; 27.5; 7.8; 24.6; 40.1; 24.6; 31.7; 32.3	16052; 12133; 103060; 0; 5807.9; 14533; 72934; 29456; 15401	10555; 0; 73106; 0; 4030.6; 0; 41372; 8149.7; 23180	0; 0; 5; 0; 0; 3; 1; 0; 2
all1361	0.0208538	1	false	truth	0	#N/A	#N/A	#N/A	#N/A	#N/A	2; 1; 1; 2; 0; 2; 0; 1; 1	2; 1; 1; 2; 0; 2; 0; 1; 1	2; 1; 1; 2; 0; 2; 0; 1; 1	1	By MS/MS; By matching; By MS/MS; By matching; By matching; By matching; By matching; By matching; By matching	4.4; 2.9; 2.5; 4.6; 0; 5.6; 0; 2.9; 2.5	2613.7; 8777.7; 0; 5200.3; 0; 4830.3; 0; 2961.2; 3406	0; 0; 0; 0; 0; 0; 0; 0; 0	1; 0; 1; 0; 0; 0; 0; 0; 0	1; 1; 2; 3; 2; 3; 2; 1; 2	1; 1; 2; 3; 2; 3; 2; 1; 2	1; 1; 2; 3; 2; 3; 2; 1; 2	2	By matching; By MS/MS; By matching; By MS/MS; By matching; By MS/MS; By MS/MS; By matching; By matching	2.9; 2.5; 5.4; 8.7; 4.3; 8.1; 4.3; 2.5; 5	4303.7; 0; 12127; 21826; 15814; 21728; 15763; 6977.8; 4313.1	0; 0; 0; 0; 7736.2; 12155; 16733; 0; 0	0; 1; 0; 1; 0; 1; 2; 0; 0
all1411	0.0334762	1	false	truth	0.186661	0.185654	0.121439	0.301396	0.101074	0.433309	2; 3; 4; 2; 5; 3; 1; 3; 2	2; 3; 4; 2; 5; 3; 1; 3; 2	2; 3; 4; 2; 5; 3; 1; 3; 2	3	By matching; By matching; By matching; By matching; By matching; By matching; By matching; By matching; By matching	18.7; 34.1; 35.8; 17.1; 48; 26.8; 10.6; 27.6; 22.8	45182; 21071; 48283; 15191; 44538; 18522; 3294.8; 18793; 5371.2	30995; 0; 20645; 13886; 11834; 10605; 0; 9395.2; 0	0; 0; 0; 0; 0; 0; 0; 0; 0	5; 5; 7; 3; 2; 4; 5; 4; 5	5; 5; 7; 3; 2; 4; 5; 4; 5	5; 5; 7; 3; 2; 4; 5; 4; 5	5	By MS/MS; By MS/MS; By MS/MS; By matching; By matching; By matching; By MS/MS; By MS/MS; By MS/MS	50.4; 49.6; 71.5; 25.2; 21.1; 40.7; 44.7; 39.8; 49.6	144870; 133550; 831990; 11278; 7394.3; 32371; 73549; 48478; 85103	110230; 184820; 189090; 7594.8; 0; 15895; 53791; 28948; 105210	2; 7; 6; 0; 0; 0; 4; 0; 6
all1440	0.00212313	1	false	truth	5.02955	4.02225	4.52275	0.709576	2.43718	32.1987	4; 3; 3; 6; 4; 6; 5; 5; 7	4; 3; 3; 6; 4; 6; 5; 5; 7	4; 3; 3; 6; 4; 6; 5; 5; 7	5	By MS/MS; By MS/MS; By MS/MS; By MS/MS; By MS/MS; By MS/MS; By MS/MS; By MS/MS; By MS/MS	11.3; 7.2; 7; 16; 10.2; 16.6; 13.7; 14.1; 18.9	41013; 53640; 44231; 148000; 128780; 131270; 23930; 73256; 87283	25951; 27570; 38191; 83306; 85127; 64085; 0; 37305; 50967	9; 2; 6; 12; 6; 3; 6; 7; 13	1; 1; 1; 1; 1; 1; 4; 3; 1	1; 1; 1; 1; 1; 1; 4; 3; 1	1; 1; 1; 1; 1; 1; 4; 3; 1	1	By matching; By MS/MS; By matching; By MS/MS; By matching; By matching; By MS/MS; By matching; By MS/MS	3.5; 2.9; 2.5; 2.9; 3.5; 3.5; 11.9; 9.4; 2.9	1008; 4822.7; 3406; 0; 1769; 1185.8; 30597; 16791; 7876.1	0; 0; 0; 0; 0; 0; 18430; 6095.7; 0	0; 1; 0; 1; 0; 0; 6; 0; 0
all1454	0.0131371	1	false	truth	1.68142	0.740158	0.491743	0.0385614	1.24283	2.25488	3; 4; 5; 6; 3; 3; 4; 4; 6	3; 4; 5; 6; 3; 3; 4; 4; 6	3; 4; 5; 6; 3; 3; 4; 4; 6	4	By MS/MS; By MS/MS; By MS/MS; By MS/MS; By MS/MS; By MS/MS; By MS/MS; By MS/MS; By MS/MS	8.9; 10.7; 13.1; 18.3; 8.9; 8.9; 11.3; 13.3; 18.9	26132; 27632; 39642; 47625; 41509; 49268; 27059; 22046; 36516	40442; 12061; 41667; 40908; 33113; 39695; 22072; 24781; 31338	3; 4; 7; 10; 5; 0; 5; 8; 10	1; 3; 2; 1; 2; 1; 4; 4; 4	1; 3; 2; 1; 2; 1; 4; 4; 4	1; 3; 2; 1; 2; 1; 4; 4; 4	2	By MS/MS; By matching; By matching; By matching; By matching; By MS/MS; By MS/MS; By MS/MS; By MS/MS	2.6; 8.9; 6.2; 3; 7.4; 2.6; 10.7; 12.1; 10.7	0; 9552.6; 5496.4; 3858.6; 6587.3; 0; 19536; 14759; 18704	0; 21848; 0; 0; 15914; 0; 30222; 17936; 12816	1; 0; 0; 0; 0; 1; 4; 1; 1
all1455	0.527249	1	false	truth	0.891822	1.15274	#N/A	2.58783	#N/A	#N/A	6; 5; 7; 7; 6; 7; 5; 2; 2	6; 5; 7; 7; 6; 7; 5; 2; 2	3; 3; 4; 4; 3; 5; 3; 2; 2	3	By MS/MS; By MS/MS; By MS/MS; By MS/MS; By MS/MS; By MS/MS; By MS/MS; By MS/MS; By MS/MS	24.1; 20; 27.8; 27.8; 24.1; 29.5; 18.3; 9.5; 9.5	23361; 17627; 28950; 31681; 26832; 50124; 38161; 14819; 0	13425; 13988; 25076; 17277; 8908.5; 7870.9; 10914; 0; 0	8; 1; 6; 7; 0; 1; 3; 1; 1	1; 3; 1; 2; 2; 2; 3; 1; 4	1; 3; 1; 2; 2; 2; 3; 1; 4	1; 2; 1; 1; 1; 2; 3; 0; 3	1	By matching; By matching; By matching; By matching; By matching; By matching; By MS/MS; By matching; By MS/MS	5.8; 12.9; 3.7; 9.2; 9.2; 9.5; 10.8; 5.8; 18	0; 5107; 3591.9; 1924.7; 1612.1; 2641.6; 0; 0; 21258	0; 2238; 0; 0; 0; 0; 0; 0; 27083	0; 0; 0; 0; 0; 0; 1; 0; 1
all1541	0.0918258	1	false	truth	0.713006	0.253566	0.407097	0.0484551	0.330404	1.16822	1; 0; 1; 2; 2; 2; 4; 2; 3	1; 0; 1; 2; 2; 2; 4; 2; 3	1; 0; 1; 2; 2; 2; 4; 2; 3	2	By MS/MS; By matching; By MS/MS; By matching; By MS/MS; By matching; By MS/MS; By MS/MS; By MS/MS	8.8; 0; 10.8; 19.5; 21.5; 21.5; 39.4; 19.9; 28.3	0; 0; 0; 13303; 9748; 5233.2; 21818; 0; 0	0; 0; 0; 13116; 0; 0; 23827; 0; 0	0; 0; 0; 0; 0; 0; 3; 1; 3	2; 2; 2; 4; 4; 2; 4; 4; 3	2; 2; 2; 4; 4; 2; 4; 4; 3	2; 2; 2; 4; 4; 2; 4; 4; 3	3	By matching; By MS/MS; By MS/MS; By MS/MS; By MS/MS; By MS/MS; By MS/MS; By MS/MS; By MS/MS	15.5; 23.9; 19.9; 39.4; 39.4; 15.5; 39.4; 39.4; 32.3	2586.9; 6132.7; 0; 104780; 27662; 4056.3; 27989; 49490; 6602.8	0; 0; 0; 40910; 0; 0; 25815; 22888; 0	0; 1; 1; 12; 7; 0; 2; 2; 0
all1663	0.653066	1	false	truth	1.12116	0.676424	0.49955	0.101553	0.705835	1.78993	1; 2; 2; 4; 0; 3; 2; 2; 4	1; 2; 2; 4; 0; 3; 2; 2; 4	1; 2; 2; 4; 0; 3; 2; 2; 4	2	By MS/MS; By MS/MS; By MS/MS; By MS/MS; By matching; By MS/MS; By MS/MS; By MS/MS; By MS/MS	2.6; 6.5; 6.7; 14.7; 0; 15.3; 6.5; 9.7; 12.1	4288.3; 7357.9; 19540; 11265; 0; 5320.7; 5471.6; 0; 8203.8	0; 0; 16143; 12135; 0; 5930.9; 10819; 0; 10071	1; 2; 1; 2; 0; 1; 2; 3; 4	2; 2; 0; 4; 2; 7; 3; 3; 3	2; 2; 0; 4; 2; 7; 3; 3; 3	2; 2; 0; 4; 2; 7; 3; 3; 3	3	By matching; By matching; By matching; By MS/MS; By MS/MS; By MS/MS; By MS/MS; By MS/MS; By MS/MS	6.7; 7.7; 0; 15.1; 6.2; 24.2; 8.7; 13.1; 10.9	6054.8; 4941.1; 0; 20333; 6095.5; 66945; 3106.2; 14474; 15407	3792.3; 7278.9; 0; 11973; 6898.4; 19388; 0; 9847.4; 14010	0; 0; 0; 3; 1; 9; 3; 0; 3
all1683	0.955628	1	false	truth	0.993159	0.27731	0.220017	0.0366424	0.803611	1.25826	4; 2; 3; 2; 3; 3; 2; 4; 2	4; 2; 3; 2; 3; 3; 2; 4; 2	4; 2; 3; 2; 3; 3; 2; 4; 2	3	By MS/MS; By matching; By MS/MS; By MS/MS; By MS/MS; By MS/MS; By MS/MS; By MS/MS; By MS/MS	11.5; 5.6; 8.4; 7.4; 9.9; 9.9; 9.2; 17.9; 7.4	10577; 15578; 15729; 8617.9; 22196; 29306; 6842.6; 16046; 9315.7	13970; 18145; 0; 0; 15749; 17106; 0; 0; 0	3; 0; 0; 2; 2; 1; 1; 1; 1	3; 3; 2; 2; 1; 3; 3; 3; 3	3; 3; 2; 2; 1; 3; 3; 3; 3	3; 3; 2; 2; 1; 3; 3; 3; 3	3	By matching; By matching; By MS/MS; By MS/MS; By MS/MS; By MS/MS; By MS/MS; By matching; By MS/MS	9.7; 9.7; 7.4; 5.9; 4.1; 11.2; 11.2; 11.2; 11.2	6622.4; 15351; 20682; 17855; 16247; 24953; 33520; 32598; 41348	0; 14455; 0; 15699; 0; 16287; 19852; 19305; 21635	0; 0; 1; 1; 1; 1; 2; 0; 3
all1732	0.734026	1	false	truth	1.15787	1.01552	0.918644	0.386225	0.505962	3.26698	2; 3; 4; 3; 1; 3; 2; 1; 2	2; 3; 4; 3; 1; 3; 2; 1; 2	2; 3; 4; 3; 1; 3; 2; 1; 2	2	By MS/MS; By matching; By MS/MS; By MS/MS; By matching; By MS/MS; By MS/MS; By MS/MS; By MS/MS	23.7; 39; 40.7; 32.2; 6.8; 39; 25.4; 8.5; 22	1802.3; 47918; 61293; 14330; 7438.9; 38351; 20648; 10304; 12470	0; 19213; 39023; 16709; 0; 12682; 17174; 0; 0	1; 0; 3; 3; 0; 2; 2; 1; 2	2; 1; 1; 2; 1; 2; 3; 2; 2	2; 1; 1; 2; 1; 2; 3; 2; 2	2; 1; 1; 2; 1; 2; 3; 2; 2	2	By matching; By MS/MS; By matching; By matching; By MS/MS; By MS/MS; By MS/MS; By matching; By MS/MS	25.4; 8.5; 8.5; 25.4; 16.9; 23.7; 39; 22; 22	45837; 0; 20352; 18324; 0; 1366.5; 28944; 29232; 25710	28708; 0; 0; 11202; 0; 0; 10664; 0; 22551	0; 1; 0; 0; 1; 1; 1; 0; 1
all1736	0.161084	1	false	false	0.773482	0.179986	#N/A	#N/A	#N/A	#N/A	2; 1; 2; 1; 1; 1; 3; 3; 1	2; 1; 2; 1; 1; 1; 3; 3; 1	2; 1; 2; 1; 1; 1; 3; 3; 1	1	By MS/MS; By matching; By MS/MS; By MS/MS; By matching; By matching; By MS/MS; By MS/MS; By MS/MS	15.6; 5.2; 11.7; 6.1; 6.1; 5.2; 17.7; 17.7; 6.5	12386; 4641; 7049.1; 0; 6750.1; 10507; 13154; 5816.2; 0	9275.5; 0; 7331.9; 0; 0; 0; 6497.4; 0; 0	2; 0; 2; 1; 0; 0; 2; 3; 1	0; 0; 1; 1; 1; 2; 1; 0; 3	0; 0; 1; 1; 1; 2; 1; 0; 3	0; 0; 1; 1; 1; 2; 1; 0; 3	1	By matching; By matching; By MS/MS; By MS/MS; By matching; By matching; By matching; By matching; By MS/MS	0; 0; 6.5; 6.1; 6.5; 14.3; 5.2; 0; 20.8	0; 0; 0; 6099.1; 2110.9; 16873; 6104.7; 0; 14402	0; 0; 0; 0; 0; 0; 0; 0; 9158.2	0; 0; 1; 1; 0; 0; 0; 0; 1
all1743	0.0161101	1	false	truth	1.65019	0.733083	0.460033	0.034107	1.23676	2.18015	3; 3; 4; 4; 7; 3; 5; 6; 6	3; 3; 4; 4; 7; 3; 5; 6; 6	3; 3; 4; 4; 7; 3; 5; 6; 6	4	By MS/MS; By MS/MS; By MS/MS; By MS/MS; By MS/MS; By MS/MS; By MS/MS; By MS/MS; By MS/MS	18.5; 18.8; 24.9; 21.3; 40.1; 14; 27.7; 35.9; 31	7588.9; 32410; 34397; 49727; 100120; 38995; 4342.1; 41433; 28458	0; 20486; 15983; 26123; 36262; 19237; 0; 32147; 23041	2; 2; 2; 2; 3; 1; 4; 7; 3	3; 4; 3; 4; 2; 4; 4; 4; 5	3; 4; 3; 4; 2; 4; 4; 4; 5	3; 4; 3; 4; 2; 4; 4; 4; 5	4	By MS/MS; By MS/MS; By MS/MS; By MS/MS; By MS/MS; By MS/MS; By MS/MS; By MS/MS; By MS/MS	17.9; 21.3; 12.8; 23.4; 13.4; 21.6; 25.2; 19.5; 28.3	16434; 13189; 17057; 55654; 15665; 56910; 23498; 29072; 18060	20530; 17346; 8967.8; 15423; 10459; 12986; 22758; 20336; 14736	2; 1; 1; 2; 0; 2; 3; 2; 0
all1751	0.175943	1	false	truth	0.854354	0.26133	0.25378	0.0440302	0.63118	1.15623	6; 4; 6; 3; 3; 6; 4; 4; 4	6; 4; 6; 3; 3; 6; 4; 4; 4	6; 4; 6; 3; 3; 6; 4; 4; 4	4	By MS/MS; By MS/MS; By MS/MS; By MS/MS; By MS/MS; By MS/MS; By MS/MS; By MS/MS; By MS/MS	23.2; 19.2; 24.1; 16.1; 14.6; 28.5; 19.2; 19.2; 19.2	30765; 27596; 20578; 17057; 15161; 35949; 0; 4810; 6061.7	20903; 32176; 17997; 12800; 17395; 17098; 0; 0; 0	5; 3; 4; 1; 1; 1; 2; 2; 1	2; 1; 6; 4; 4; 4; 6; 4; 5	2; 1; 6; 4; 4; 4; 6; 4; 5	2; 1; 6; 4; 4; 4; 6; 4; 5	4	By MS/MS; By MS/MS; By MS/MS; By MS/MS; By MS/MS; By MS/MS; By MS/MS; By MS/MS; By MS/MS	11.8; 3.1; 27.6; 19.2; 19.2; 19.2; 23.5; 20.7; 20.1	9592; 0; 35273; 5049.8; 4694.2; 0; 44557; 31614; 8799.5	0; 0; 20010; 0; 0; 0; 31035; 0; 0	1; 1; 2; 1; 0; 1; 5; 1; 3
all1861	0.206289	1	false	truth	1.31622	0.742677	0.500298	0.0991858	0.914467	2.00783	4; 5; 3; 6; 5; 4; 4; 4; 4	4; 5; 3; 6; 5; 4; 4; 4; 4	4; 5; 3; 6; 5; 4; 4; 4; 4	4	By MS/MS; By MS/MS; By MS/MS; By MS/MS; By MS/MS; By MS/MS; By MS/MS; By MS/MS; By MS/MS	20.8; 27.9; 14.9; 36.1; 27.9; 27.9; 20.8; 20.8; 20.8	52058; 90527; 38264; 141310; 129900; 144040; 32780; 0; 130750	27044; 57978; 0; 49002; 53157; 79922; 69863; 0; 61758	7; 7; 5; 10; 9; 3; 8; 4; 10	6; 4; 5; 4; 5; 5; 4; 3; 5	6; 4; 5; 4; 5; 5; 4; 3; 5	6; 4; 5; 4; 5; 5; 4; 3; 5	5	By MS/MS; By MS/MS; By MS/MS; By MS/MS; By MS/MS; By MS/MS; By MS/MS; By MS/MS; By MS/MS	36.1; 27.9; 36.1; 20.8; 23.8; 29.7; 20.8; 17.5; 27.9	87566; 55024; 40955; 127300; 32543; 118740; 23059; 138510; 72414	49169; 20733; 0; 46236; 25693; 56227; 0; 82872; 29959	8; 4; 7; 3; 2; 5; 6; 3; 2
all1863	0.222473	1	false	truth	2.95259	2.04728	2.51984	0.0733385	0.558198	5.81433	1; 1; 2; 1; 2; 3; 1; 2; 1	1; 1; 2; 1; 2; 3; 1; 2; 1	1; 1; 2; 1; 2; 3; 1; 2; 1	1	By MS/MS; By MS/MS; By MS/MS; By MS/MS; By MS/MS; By MS/MS; By MS/MS; By MS/MS; By MS/MS	5.2; 5.2; 9.1; 5.2; 15.7; 21.3; 7; 15.7; 5.2	0; 9027.4; 22718; 9862.4; 12856; 4111.4; 11948; 0; 0	0; 0; 14583; 0; 18229; 3072.6; 0; 0; 0	1; 1; 4; 2; 1; 2; 1; 2; 1	1; 2; 2; 1; 0; 2; 3; 0; 2	1; 2; 2; 1; 0; 2; 3; 0; 2	1; 2; 2; 1; 0; 2; 3; 0; 2	2	By MS/MS; By matching; By MS/MS; By MS/MS; By matching; By MS/MS; By MS/MS; By matching; By MS/MS	5.2; 12.2; 9.1; 8.7; 0; 9.1; 20.9; 0; 9.1	0; 16112; 5413.6; 0; 0; 6347.3; 14387; 0; 10093	0; 5023.6; 0; 0; 0; 3811.8; 5317.9; 0; 0	1; 0; 1; 1; 0; 1; 4; 0; 2
all1864	0.283154	1	false	truth	2.23903	2.16163	2.34276	0.500145	0.479448	8.47926	4; 3; 3; 2; 1; 1; 1; 1; 1	4; 3; 3; 2; 1; 1; 1; 1; 1	4; 3; 3; 2; 1; 1; 1; 1; 1	1	By MS/MS; By MS/MS; By MS/MS; By MS/MS; By MS/MS; By matching; By MS/MS; By matching; By matching	17.7; 13.7; 13.7; 9.6; 4.4; 4; 5.2; 4.4; 4.4	39072; 41563; 32978; 15978; 19852; 4354.2; 0; 4088; 3953.7	69965; 13309; 45208; 0; 0; 0; 0; 0; 0	4; 2; 5; 2; 1; 0; 1; 0; 0	4; 3; 2; 0; 2; 4; 3; 0; 2	4; 3; 2; 0; 2; 4; 3; 0; 2	4; 3; 2; 0; 2; 4; 3; 0; 2	2	By MS/MS; By MS/MS; By MS/MS; By matching; By matching; By MS/MS; By MS/MS; By matching; By MS/MS	17.7; 13.7; 8.4; 0; 8.4; 31.7; 13.7; 0; 9.6	39228; 4568.9; 46298; 0; 11708; 7085.7; 12283; 0; 30409	34645; 0; 12804; 0; 0; 0; 9245; 0; 16613	2; 3; 1; 0; 0; 3; 2; 0; 1
all1865	0.231257	1	false	truth	0.752809	0.347568	0.295236	0.12432	0.526576	1.19279	1; 1; 3; 1; 1; 2; 2; 1; 2	1; 1; 3; 1; 1; 2; 2; 1; 2	1; 1; 3; 1; 1; 2; 2; 1; 2	1	By matching; By matching; By MS/MS; By matching; By matching; By matching; By MS/MS; By MS/MS; By MS/MS	3.7; 3.2; 14.2; 5.2; 4.2; 7; 8; 3.7; 8	2461.8; 2120; 10876; 4704.3; 3341.9; 23170; 12009; 4488.2; 1798.1	0; 0; 0; 0; 0; 17424; 25759; 0; 0	0; 0; 2; 0; 0; 0; 3; 1; 1	1; 2; 2; 3; 2; 3; 2; 3; 6	1; 2; 2; 3; 2; 3; 2; 3; 6	1; 2; 2; 3; 2; 3; 2; 3; 6	2	By matching; By matching; By matching; By MS/MS; By MS/MS; By MS/MS; By MS/MS; By matching; By MS/MS	4.2; 9.5; 8; 11.2; 8; 12.4; 7; 13.7; 26.4	1054.2; 3392.1; 5797.3; 63566; 63128; 121960; 31460; 5037.2; 46686	0; 0; 14006; 44618; 38627; 46009; 23999; 0; 15243	0; 0; 0; 3; 2; 5; 3; 0; 3
all1872	0.541819	1	false	truth	0.87309	0.558395	0.324964	0.0844737	0.6046	1.3027	5; 4; 5; 2; 5; 5; 5; 7; 9	5; 4; 5; 2; 5; 5; 5; 7; 9	5; 4; 5; 2; 5; 5; 5; 7; 9	5	By MS/MS; By MS/MS; By MS/MS; By matching; By MS/MS; By MS/MS; By MS/MS; By MS/MS; By MS/MS	15.5; 10.7; 13.1; 5; 12.9; 14.3; 13.5; 21.7; 25.2	134090; 136310; 91269; 40756; 25064; 43066; 12403; 21852; 17793	52937; 63220; 32054; 46721; 20211; 28617; 25656; 28312; 19803	1; 1; 3; 0; 1; 1; 6; 7; 11	4; 5; 2; 6; 4; 7; 5; 5; 2	4; 5; 2; 6; 4; 7; 5; 5; 2	4; 5; 2; 6; 4; 7; 5; 5; 2	5	By MS/MS; By MS/MS; By MS/MS; By MS/MS; By MS/MS; By MS/MS; By MS/MS; By matching; By MS/MS	11.5; 14.3; 6; 15.3; 11.3; 23.1; 12.9; 12.9; 6.6	72650; 62911; 31576; 41548; 65109; 117390; 79160; 46878; 28908	61199; 52322; 29288; 38118; 20518; 27156; 44376; 25648; 66924	1; 3; 1; 6; 4; 8; 3; 0; 3
all1897	0.0206547	1	false	truth	1.93295	0.235905	#N/A	#N/A	#N/A	#N/A	0; 2; 2; 2; 0; 1; 1; 2; 3	0; 2; 2; 2; 0; 1; 1; 2; 3	0; 2; 2; 2; 0; 1; 1; 2; 3	2	By matching; By MS/MS; By MS/MS; By MS/MS; By matching; By matching; By matching; By MS/MS; By MS/MS	0; 13; 9.7; 11.8; 0; 5; 5; 12.2; 17.6	0; 21073; 6625.3; 4193.6; 0; 2096.9; 2095.6; 0; 12836	0; 9993.4; 7045.4; 0; 0; 0; 0; 0; 10257	0; 1; 1; 1; 0; 0; 0; 2; 3	0; 1; 1; 3; 1; 1; 0; 1; 0	0; 1; 1; 3; 1; 1; 0; 1; 0	0; 1; 1; 3; 1; 1; 0; 1; 0	1	By matching; By matching; By matching; By matching; By matching; By matching; By matching; By matching; By matching	0; 4.6; 7.1; 17.2; 5; 4.6; 0; 5; 0	0; 6553.5; 7656.1; 13962; 3032.9; 4826.4; 0; 2675.4; 0	0; 0; 0; 6686.3; 0; 0; 0; 0; 0	0; 0; 0; 0; 0; 0; 0; 0; 0
all1939		1	false	truth	0.669442	0.364608	0.212188	0.0214422	0.46911	0.899112	4; 5; 6; 4; 6; 5; 7; 6; 3	4; 5; 6; 4; 6; 5; 7; 6; 3	4; 5; 6; 4; 6; 5; 7; 6; 3	5	By MS/MS; By MS/MS; By MS/MS; By MS/MS; By MS/MS; By MS/MS; By MS/MS; By MS/MS; By MS/MS	9.8; 13.5; 17.2; 13.3; 17; 14.1; 18.9; 16.8; 9	12560; 17055; 12180; 25819; 43833; 47698; 45059; 38968; 22165	6444.8; 7865.7; 13377; 30362; 17772; 9704.6; 26640; 24452; 19015	2; 1; 4; 5; 4; 1; 7; 9; 4	3; 5; 3; 7; 6; 6; 6; 5; 7	3; 5; 3; 7; 6; 6; 6; 5; 7	3; 5; 3; 7; 6; 6; 6; 5; 7	6	By MS/MS; By MS/MS; By MS/MS; By MS/MS; By MS/MS; By MS/MS; By MS/MS; By MS/MS; By MS/MS	9.4; 14.3; 7; 24.8; 18; 19.3; 16.6; 16.4; 20.3	7940.3; 10897; 9727.9; 85064; 87681; 68894; 46451; 61648; 55942	20162; 14302; 20445; 37264; 29241; 28389; 27999; 30695; 35133	2; 3; 2; 11; 3; 7; 9; 1; 7
all1940	0.52876	1	false	truth	0.824291	0.579419	0.462366	0.0249877	0.376687	1.31415	7; 1; 6; 2; 3; 3; 6; 4; 5	7; 1; 6; 2; 3; 3; 6; 4; 5	7; 1; 6; 2; 3; 3; 6; 4; 5	4	By MS/MS; By MS/MS; By MS/MS; By matching; By MS/MS; By matching; By MS/MS; By MS/MS; By MS/MS	18.9; 4.2; 17.8; 5.9; 10; 9.1; 17.4; 14.4; 15.9	359310; 0; 356390; 1537.7; 9049; 39075; 21677; 13048; 12064	34555; 0; 101910; 0; 0; 0; 41128; 29932; 46928	1; 0; 3; 0; 1; 0; 2; 1; 1	2; 5; 6; 5; 4; 4; 4; 2; 4	2; 5; 6; 5; 4; 4; 4; 2; 4	2; 5; 6; 5; 4; 4; 4; 2; 4	4	By MS/MS; By matching; By MS/MS; By MS/MS; By MS/MS; By MS/MS; By MS/MS; By matching; By MS/MS	6.4; 13.3; 16.1; 15.5; 13.3; 14.6; 13.8; 5.9; 13.1	2276.7; 212860; 239740; 142710; 32792; 25728; 31981; 16183; 48987	0; 51127; 39874; 113890; 76694; 63947; 68782; 0; 63580	0; 0; 0; 4; 3; 4; 4; 0; 1
all1974	0.552547	1	false	truth	1.10124	0.247829	#N/A	#N/A	#N/A	#N/A	4; 2; 3; 3; 1; 2; 2; 4; 0	4; 2; 3; 3; 1; 2; 2; 4; 0	4; 2; 3; 3; 1; 2; 2; 4; 0	2	By MS/MS; By matching; By MS/MS; By MS/MS; By matching; By matching; By matching; By MS/MS; By matching	4.5; 2.5; 4.3; 3.2; 1.8; 2.6; 2.6; 4.9; 0	19722; 6422.7; 7713.5; 14251; 10701; 20298; 9396.7; 8216.6; 0	14680; 0; 0; 9148.9; 0; 10601; 0; 0; 0	1; 0; 1; 1; 0; 0; 0; 2; 0	2; 2; 1; 4; 0; 3; 2; 4; 2	2; 2; 1; 4; 0; 3; 2; 4; 2	2; 2; 1; 4; 0; 3; 2; 4; 2	2	By matching; By matching; By matching; By MS/MS; By matching; By MS/MS; By MS/MS; By matching; By MS/MS	1.9; 1.7; 1; 4.6; 0; 4.1; 2.1; 5; 2.6	15645; 9903; 4414.9; 11489; 0; 4828.7; 5947.8; 24970; 12443	0; 0; 0; 0; 0; 0; 12756; 0; 0	0; 0; 0; 1; 0; 1; 1; 0; 1
all1975	0.49717	1	false	truth	1.13423	0.635522	0.369849	0.0852114	0.839019	1.64075	5; 6; 4; 6; 4; 7; 4; 10; 6	5; 6; 4; 6; 4; 7; 4; 10; 6	5; 6; 4; 6; 4; 7; 4; 10; 6	6	By MS/MS; By MS/MS; By MS/MS; By MS/MS; By MS/MS; By MS/MS; By MS/MS; By MS/MS; By MS/MS	20; 19.2; 13.7; 23.2; 12.6; 22.6; 12.9; 38.7; 20.3	34082; 45298; 28643; 68559; 33331; 62025; 25314; 45446; 66692	27972; 27153; 18413; 32329; 44339; 26256; 34629; 34944; 36494	7; 4; 2; 6; 4; 3; 4; 9; 4	7; 3; 3; 7; 6; 9; 7; 4; 6	7; 3; 3; 7; 6; 9; 7; 4; 6	7; 3; 3; 7; 6; 9; 7; 4; 6	6	By MS/MS; By MS/MS; By MS/MS; By MS/MS; By MS/MS; By MS/MS; By MS/MS; By matching; By MS/MS	22.1; 8.4; 8.4; 28.9; 20.8; 28.2; 21.3; 13.2; 17.9	17900; 5307; 16935; 90575; 62305; 66685; 65714; 38192; 80399	11563; 9065.9; 20332; 37899; 36701; 32798; 34629; 26812; 52100	1; 3; 2; 3; 3; 5; 4; 0; 4
all2003	0.815206	1	false	truth	0.949122	0.548132	0.369472	0.0751152	0.634367	1.41805	3; 1; 2; 1; 3; 1; 2; 2; 2	3; 1; 2; 1; 3; 1; 2; 2; 2	3; 1; 2; 1; 3; 1; 2; 2; 2	2	By MS/MS; By MS/MS; By MS/MS; By MS/MS; By MS/MS; By MS/MS; By MS/MS; By MS/MS; By MS/MS	44; 18; 44; 18; 44; 18; 44; 44; 44	53766; 27889; 59581; 6137.4; 17589; 0; 37661; 27624; 34420	33234; 0; 20107; 0; 8175; 0; 21208; 22904; 18835	10; 8; 5; 1; 2; 1; 7; 3; 10	1; 2; 2; 1; 1; 3; 2; 3; 2	1; 2; 2; 1; 1; 3; 2; 3; 2	1; 2; 2; 1; 1; 3; 2; 3; 2	2	By MS/MS; By MS/MS; By MS/MS; By MS/MS; By MS/MS; By MS/MS; By MS/MS; By MS/MS; By MS/MS	18; 37; 37; 18; 18; 44; 44; 44; 44	15204; 20882; 26962; 14572; 24533; 69295; 65254; 65812; 48701	12219; 18511; 36553; 0; 28139; 13513; 28557; 27164; 10366	4; 6; 2; 5; 5; 9; 7; 4; 4
all2050	0.171122	1	false	truth	1.20683	0.240147	0.295578	0.0386289	0.949991	1.56066	2; 2; 2; 1; 2; 3; 4; 2; 2	2; 2; 2; 1; 2; 3; 4; 2; 2	2; 2; 2; 1; 2; 3; 4; 2; 2	2	By matching; By matching; By matching; By matching; By MS/MS; By matching; By MS/MS; By MS/MS; By MS/MS	5.3; 7.5; 6.2; 3.9; 6.6; 10.1; 11.9; 7.5; 7.5	23688; 4838.3; 19460; 7087.3; 4938.1; 35753; 15360; 3525.2; 5075.7	0; 0; 15584; 0; 0; 15659; 23874; 0; 0	0; 0; 0; 0; 1; 0; 6; 3; 1	2; 4; 2; 4; 3; 4; 5; 2; 6	2; 4; 2; 4; 3; 4; 5; 2; 6	2; 4; 2; 4; 3; 4; 5; 2; 6	4	By matching; By matching; By matching; By MS/MS; By matching; By MS/MS; By MS/MS; By MS/MS; By MS/MS	6.4; 13; 6.2; 12.8; 10.5; 14.3; 14.5; 6.4; 17.4	14538; 21517; 14843; 6351.9; 7816.8; 22161; 45624; 38328; 50360	0; 12820; 0; 0; 0; 0; 21589; 0; 12927	0; 0; 0; 3; 0; 3; 5; 0; 5
all2072	0.134601	1	false	truth	1.3535	0.693026	0.452122	0.060674	0.96631	1.91555	3; 5; 3; 5; 4; 3; 4; 3; 2	3; 5; 3; 5; 4; 3; 4; 3; 2	3; 5; 3; 5; 4; 3; 4; 3; 2	3	By MS/MS; By MS/MS; By MS/MS; By MS/MS; By MS/MS; By matching; By MS/MS; By MS/MS; By MS/MS	12.1; 24.2; 12.9; 21.5; 21.5; 15.4; 21.5; 16.3; 12.4	25188; 31591; 13327; 28573; 25890; 17349; 17488; 28081; 9111.7	21002; 17941; 13712; 18806; 10569; 5506; 7325.7; 16270; 21121	4; 3; 4; 5; 2; 0; 4; 2; 2	3; 2; 2; 3; 2; 4; 1; 2; 3	3; 2; 2; 3; 2; 4; 1; 2; 3	3; 2; 2; 3; 2; 4; 1; 2; 3	2	By MS/MS; By MS/MS; By MS/MS; By MS/MS; By MS/MS; By MS/MS; By MS/MS; By MS/MS; By MS/MS	16.3; 6.9; 12.4; 15.2; 11.3; 21.5; 3.9; 11.3; 12.1	10391; 0; 5313.7; 14024; 9325.1; 28042; 14452; 9234; 15775	5348.9; 0; 13339; 9695.1; 0; 13325; 0; 12182; 13887	2; 2; 0; 4; 2; 4; 1; 1; 4
all2080	0.548736	1	false	truth	0.891271	0.507986	0.295628	0.0415563	0.625483	1.23435	6; 6; 7; 6; 4; 6; 3; 5; 3	6; 6; 7; 6; 4; 6; 3; 5; 3	6; 6; 7; 6; 4; 6; 3; 5; 3	6	By MS/MS; By MS/MS; By MS/MS; By MS/MS; By MS/MS; By MS/MS; By MS/MS; By MS/MS; By MS/MS	43.8; 56.2; 56.2; 56.2; 47.4; 56.2; 31.4; 56.2; 31.4	96127; 115240; 198910; 71425; 22813; 251630; 30932; 76835; 38404	69497; 31105; 50381; 28856; 30824; 77690; 64264; 102330; 69386	9; 4; 12; 9; 5; 4; 6; 6; 5	6; 7; 6; 4; 5; 4; 5; 6; 6	6; 7; 6; 4; 5; 4; 5; 6; 6	6; 7; 6; 4; 5; 4; 5; 6; 6	6	By MS/MS; By MS/MS; By MS/MS; By MS/MS; By MS/MS; By MS/MS; By MS/MS; By MS/MS; By MS/MS	56.2; 56.2; 56.2; 47.4; 55.5; 48.2; 43.8; 56.2; 43.8	51359; 134920; 95209; 141620; 192800; 144630; 118460; 133520; 230850	34197; 56643; 37357; 154700; 82608; 59612; 74405; 63141; 77642	2; 4; 3; 6; 4; 4; 5; 5; 6
all2086	0.664494	1	false	truth	1.12359	0.612374	0.509259	0.0340542	0.643536	1.68288	1; 3; 3; 2; 4; 2; 3; 4; 3	1; 3; 3; 2; 4; 2; 3; 4; 3	1; 3; 3; 2; 4; 2; 3; 4; 3	3	By matching; By MS/MS; By MS/MS; By MS/MS; By MS/MS; By matching; By MS/MS; By MS/MS; By MS/MS	3.7; 10.1; 9.8; 6.6; 11.9; 7.3; 9.2; 12.8; 9.2	14904; 11996; 9685; 6614.1; 15975; 17626; 0; 14909; 19261	0; 23598; 4925.7; 0; 0; 8907; 0; 13573; 10274	0; 3; 1; 3; 1; 0; 2; 4; 2	1; 1; 2; 6; 3; 2; 4; 3; 6	1; 1; 2; 6; 3; 2; 4; 3; 6	1; 1; 2; 6; 3; 2; 4; 3; 6	3	By MS/MS; By MS/MS; By MS/MS; By MS/MS; By MS/MS; By MS/MS; By MS/MS; By MS/MS; By MS/MS	3.5; 3.5; 7.3; 15.6; 9.6; 6.6; 12.8; 9; 19.1	6303; 7270.4; 10164; 14881; 26907; 17385; 23715; 20600; 17067	0; 0; 7679.1; 0; 12131; 13227; 15091; 8887.9; 0	1; 1; 1; 4; 1; 3; 4; 0; 3
all2105	0.0507846	1	false	truth	1.43271	0.544894	0.35831	0.0112852	1.08835	1.80979	3; 2; 2; 3; 4; 4; 4; 4; 4	3; 2; 2; 3; 4; 4; 4; 4; 4	3; 2; 2; 3; 4; 4; 4; 4; 4	4	By MS/MS; By MS/MS; By MS/MS; By MS/MS; By MS/MS; By MS/MS; By MS/MS; By MS/MS; By MS/MS	27.1; 13.5; 16.9; 20.3; 25.6; 25.6; 25.1; 31.9; 25.1	11352; 4909.2; 3842.2; 14084; 15184; 31085; 18148; 12289; 8025.3	9991.7; 4414.1; 0; 8249; 8273.2; 12896; 8248.5; 13892; 11526	2; 1; 2; 4; 2; 1; 6; 11; 11	3; 1; 3; 4; 3; 2; 2; 4; 1	3; 1; 3; 4; 3; 2; 2; 4; 1	3; 1; 3; 4; 3; 2; 2; 4; 1	3	By MS/MS; By matching; By MS/MS; By MS/MS; By MS/MS; By MS/MS; By MS/MS; By MS/MS; By MS/MS	21.7; 8.7; 21.7; 25.1; 31.4; 16.9; 16.9; 36.2; 8.2	5439.2; 5438; 5479.9; 14811; 14092; 2694.2; 1669.2; 14613; 0	6730.6; 6543.1; 5265.6; 9138; 0; 0; 0; 7988.5; 0	1; 0; 0; 4; 1; 1; 1; 0; 0
all2110	0.662317	1	false	truth	1.09875	0.645462	0.40194	0.0498377	0.740026	1.57274	5; 5; 6; 2; 5; 3; 6; 2; 4	5; 5; 6; 2; 5; 3; 6; 2; 4	5; 5; 5; 2; 5; 3; 6; 2; 4	5	By MS/MS; By MS/MS; By MS/MS; By MS/MS; By MS/MS; By MS/MS; By MS/MS; By MS/MS; By MS/MS	35.8; 39.3; 43.3; 13.9; 38.8; 28.9; 37.3; 6; 24.4	59786; 32620; 24860; 27353; 74305; 8406.8; 21772; 8797.2; 69919	33634; 28402; 36503; 15802; 28846; 0; 15593; 16820; 53942	7; 5; 6; 2; 6; 1; 5; 2; 3	3; 9; 3; 5; 4; 6; 3; 2; 2	3; 9; 3; 5; 4; 6; 3; 2; 2	3; 9; 3; 5; 4; 6; 3; 2; 2	3	By MS/MS; By MS/MS; By MS/MS; By MS/MS; By MS/MS; By MS/MS; By MS/MS; By MS/MS; By MS/MS	29.4; 61.2; 23.9; 39.3; 39.3; 55.2; 23.9; 20.4; 11.9	40638; 30858; 7700.2; 70300; 76923; 31331; 33857; 5753.1; 52340	29730; 19958; 10926; 41922; 38134; 20618; 28275; 0; 28435	4; 4; 1; 3; 3; 4; 3; 1; 1
all2303	0.481992	1	false	truth	1.09392	0.400785	0.233241	0.014977	0.874957	1.34615	7; 7; 9; 7; 6; 6; 5; 7; 8	7; 7; 9; 7; 6; 6; 5; 7; 8	7; 7; 9; 7; 6; 6; 5; 7; 8	7	By MS/MS; By MS/MS; By MS/MS; By MS/MS; By MS/MS; By MS/MS; By MS/MS; By MS/MS; By MS/MS	28.7; 28.9; 34.4; 25.7; 22.6; 22.3; 16.6; 26.2; 31.4	125210; 124290; 143320; 67167; 61790; 138700; 94732; 82937; 121740	101600; 83165; 120430; 81071; 57642; 58859; 64372; 67187; 76497	9; 5; 10; 11; 5; 5; 8; 10; 8	6; 4; 4; 5; 6; 7; 6; 3; 5	6; 4; 4; 5; 6; 7; 6; 3; 5	6; 4; 4; 5; 6; 7; 6; 3; 5	5	By MS/MS; By MS/MS; By MS/MS; By MS/MS; By MS/MS; By MS/MS; By MS/MS; By MS/MS; By MS/MS	23.2; 17.1; 17.5; 22.8; 25.3; 30.8; 25.3; 10.5; 19.6	88924; 92882; 56914; 171280; 115940; 167450; 129160; 65669; 77063	73826; 68987; 88928; 78895; 73340; 83198; 76788; 48535; 80799	6; 7; 2; 10; 5; 11; 11; 2; 6
all2315	0.689719	1	false	truth	1.06553	0.494086	0.287539	0.0276722	0.802681	1.38903	7; 5; 10; 9; 8; 8; 5; 5; 5	7; 5; 10; 9; 8; 8; 5; 5; 5	7; 5; 10; 9; 8; 8; 5; 5; 5	7	By MS/MS; By MS/MS; By MS/MS; By MS/MS; By MS/MS; By MS/MS; By MS/MS; By MS/MS; By MS/MS	33.8; 25.4; 52.3; 45.6; 41.4; 38.7; 26; 25.4; 23.3	39651; 67154; 50452; 61045; 42590; 83070; 31210; 33216; 28723	27354; 32020; 35253; 32744; 19818; 51752; 24268; 23745; 24419	5; 5; 8; 28; 5; 3; 5; 15; 14	5; 6; 5; 7; 7; 9; 5; 6; 7	5; 6; 5; 7; 7; 9; 5; 6; 7	5; 6; 5; 7; 7; 9; 5; 6; 7	6	By MS/MS; By MS/MS; By matching; By MS/MS; By MS/MS; By MS/MS; By MS/MS; By MS/MS; By MS/MS	28.4; 32; 25.1; 37.2; 35; 48; 25.4; 28.7; 36.6	13411; 42436; 42468; 35125; 19042; 64395; 48806; 10914; 77950	23169; 32722; 34255; 24235; 25608; 27392; 27963; 26189; 40939	2; 3; 0; 7; 3; 8; 7; 1; 5
all2316	0.196542	1	false	truth	1.31561	0.774816	0.493444	0.103061	0.924269	2.00929	2; 2; 1; 2; 2; 2; 3; 3; 3	2; 2; 1; 2; 2; 2; 3; 3; 3	2; 2; 1; 2; 2; 2; 3; 3; 3	2	By MS/MS; By MS/MS; By MS/MS; By MS/MS; By MS/MS; By matching; By MS/MS; By MS/MS; By MS/MS	9.5; 9.5; 5.3; 9.5; 9.5; 11.3; 14.1; 14.1; 14.1	81734; 71171; 55425; 82005; 80196; 61705; 46467; 27105; 41712	40120; 33381; 0; 37000; 30989; 0; 32583; 16723; 19533	8; 3; 8; 7; 1; 0; 4; 1; 2	2; 2; 3; 2; 2; 2; 3; 3; 3	2; 2; 3; 2; 2; 2; 3; 3; 3	2; 2; 3; 2; 2; 2; 3; 3; 3	2	By MS/MS; By MS/MS; By MS/MS; By MS/MS; By matching; By MS/MS; By MS/MS; By matching; By MS/MS	9.9; 9.5; 15.5; 9.9; 9.9; 9.9; 14.1; 14.1; 17.3	52510; 68975; 19636; 33630; 52317; 51878; 64474; 26515; 10520	32282; 36728; 11149; 16003; 27082; 20887; 25265; 11558; 0	1; 7; 1; 1; 0; 3; 4; 0; 2
all2319	0.863467	1	false	truth	1.04608	0.733455	0.477162	0.122755	0.662399	1.72253	4; 4; 4; 5; 4; 3; 5; 5; 5	4; 4; 4; 5; 4; 3; 5; 5; 5	4; 4; 4; 5; 4; 3; 5; 5; 5	4	By MS/MS; By MS/MS; By MS/MS; By MS/MS; By MS/MS; By MS/MS; By MS/MS; By MS/MS; By MS/MS	43.8; 50.9; 42.9; 43.8; 42.9; 34.8; 43.8; 58.9; 43.8	7724.9; 231670; 193350; 317290; 306000; 178870; 197340; 194420; 166710	0; 203340; 176360; 207680; 168560; 35240; 121490; 143230; 59110	4; 4; 6; 8; 6; 3; 5; 4; 5	4; 5; 5; 5; 3; 4; 5; 4; 2	4; 5; 5; 5; 3; 4; 5; 4; 2	4; 5; 5; 5; 3; 4; 5; 4; 2	4	By MS/MS; By MS/MS; By MS/MS; By MS/MS; By MS/MS; By MS/MS; By MS/MS; By MS/MS; By MS/MS	28.6; 43.8; 58.9; 43.8; 33; 50.9; 43.8; 33.9; 25	280730; 249150; 162670; 305570; 344850; 255160; 274620; 18245; 214750	208030; 200540; 131700; 79071; 92706; 0; 164340; 62968; 0	5; 5; 4; 2; 2; 5; 4; 2; 3
all2327	0.164307	1	false	truth	1.19939	0.442978	0.257796	0.0220901	0.964389	1.48858	6; 6; 6; 6; 6; 5; 6; 5; 6	6; 6; 6; 6; 6; 5; 6; 5; 6	6; 6; 6; 6; 6; 5; 6; 5; 6	6	By MS/MS; By MS/MS; By MS/MS; By MS/MS; By MS/MS; By MS/MS; By MS/MS; By MS/MS; By MS/MS	57.4; 57.4; 57.4; 57.4; 57.4; 51.5; 57.4; 48.5; 57.4	238290; 237950; 331600; 404540; 430920; 540960; 250560; 342960; 420520	173690; 257940; 206720; 268520; 229500; 331090; 251650; 384660; 307010	15; 13; 16; 28; 16; 13; 24; 30; 24	6; 6; 5; 5; 5; 6; 6; 6; 6	6; 6; 5; 5; 5; 6; 6; 6; 6	6; 6; 5; 5; 5; 6; 6; 6; 6	6	By MS/MS; By MS/MS; By MS/MS; By MS/MS; By MS/MS; By MS/MS; By MS/MS; By MS/MS; By MS/MS	57.4; 57.4; 43.8; 48.5; 48.5; 57.4; 57.4; 57.4; 48.5	251530; 322320; 292110; 430690; 497080; 260680; 481160; 604520; 314960	153070; 219980; 249800; 235870; 296120; 166230; 244460; 296730; 221800	18; 21; 15; 21; 10; 17; 23; 9; 15
all2342	0.249764	1	false	truth	0.562244	0.585031	0.394101	0.34574	0.288685	1.43003	4; 3; 6; 5; 5; 6; 5; 6; 6	4; 3; 6; 5; 5; 6; 5; 6; 6	4; 3; 6; 5; 5; 6; 5; 6; 6	5	By MS/MS; By MS/MS; By MS/MS; By MS/MS; By MS/MS; By MS/MS; By MS/MS; By MS/MS; By MS/MS	22.1; 16.3; 32.6; 27.9; 24.4; 31.8; 27.9; 32.9; 32.6	16571; 16197; 17969; 34850; 13171; 68241; 74371; 42586; 55523	9234.5; 0; 6381.7; 16400; 0; 38764; 33204; 20999; 34178	0; 1; 0; 1; 0; 1; 4; 5; 5	4; 5; 4; 4; 5; 5; 5; 3; 4	4; 5; 4; 4; 5; 5; 5; 3; 4	4; 5; 4; 4; 5; 5; 5; 3; 4	4	By MS/MS; By MS/MS; By MS/MS; By MS/MS; By MS/MS; By MS/MS; By MS/MS; By MS/MS; By MS/MS	23.6; 25.6; 24; 22.5; 29.5; 28.3; 27.5; 17.4; 23.3	16245; 40078; 71204; 72887; 88016; 29269; 30710; 19370; 78811	7485.6; 58092; 79280; 0; 12724; 21221; 12439; 0; 79920	0; 1; 3; 1; 2; 2; 5; 2; 3
all2358	0.857647	1	false	truth	0.97061	0.476947	0.277564	0.0378149	0.72323	1.29428	5; 5; 7; 8; 7; 7; 8; 5; 7	5; 5; 7; 8; 7; 7; 8; 5; 7	5; 5; 7; 8; 7; 7; 8; 5; 7	7	By MS/MS; By MS/MS; By MS/MS; By MS/MS; By MS/MS; By MS/MS; By MS/MS; By MS/MS; By MS/MS	27.9; 18.1; 31; 29.8; 29.8; 32.5; 27.9; 25.5; 27	34159; 13961; 40989; 92320; 108470; 74773; 60049; 37940; 67573	35839; 14350; 27516; 47129; 52028; 29971; 34830; 24769; 43742	4; 0; 5; 6; 5; 2; 8; 2; 3	7; 7; 4; 5; 4; 4; 4; 5; 5	7; 7; 4; 5; 4; 4; 4; 5; 5	7; 7; 4; 5; 4; 4; 4; 5; 5	5	By MS/MS; By MS/MS; By MS/MS; By MS/MS; By MS/MS; By MS/MS; By MS/MS; By MS/MS; By MS/MS	21.5; 26.1; 16.3; 23.3; 21.2; 18.4; 15.3; 21.2; 21.5	79016; 46112; 42451; 46265; 59731; 58449; 29850; 116470; 42005	22777; 27739; 27073; 36418; 47045; 38728; 33599; 44289; 54178	2; 3; 3; 3; 1; 3; 3; 2; 4
all2367	0.577345	1	false	truth	1.11091	0.363229	0.352909	0.0075333	0.765	1.47369	0; 1; 2; 2; 0; 3; 3; 0; 2	0; 1; 2; 2; 0; 3; 3; 0; 2	0; 1; 2; 2; 0; 3; 3; 0; 2	2	By matching; By matching; By MS/MS; By MS/MS; By matching; By MS/MS; By MS/MS; By matching; By MS/MS	0; 13; 21.3; 27.8; 0; 36.1; 36.1; 0; 21.3	0; 10883; 8353.8; 18288; 0; 17184; 14054; 0; 0	0; 0; 7153.4; 14525; 0; 9746.8; 8861; 0; 0	0; 0; 1; 2; 0; 2; 2; 0; 2	0; 1; 0; 1; 2; 2; 2; 0; 3	0; 1; 0; 1; 2; 2; 2; 0; 3	0; 1; 0; 1; 2; 2; 2; 0; 3	1	By matching; By matching; By matching; By MS/MS; By matching; By matching; By MS/MS; By matching; By matching	0; 13; 0; 13; 27.8; 21.3; 23.1; 0; 36.1	0; 4205.7; 0; 4261.2; 18124; 19803; 15781; 0; 18676	0; 0; 0; 0; 9182; 10761; 9647.4; 0; 8488.5	0; 0; 0; 1; 0; 0; 1; 0; 0
all2375	0.304701	1	false	truth	1.12049	0.369937	0.215289	0.0321809	0.935755	1.37973	7; 6; 7; 7; 5; 6; 5; 8; 6	7; 6; 7; 7; 5; 6; 5; 8; 6	7; 6; 7; 7; 5; 6; 5; 8; 6	6	By MS/MS; By MS/MS; By MS/MS; By MS/MS; By MS/MS; By MS/MS; By MS/MS; By MS/MS; By MS/MS	66.9; 61.4; 75.9; 66.9; 56.6; 69.7; 46.9; 77.2; 56.6	154290; 196520; 186870; 339680; 306570; 234060; 252420; 149210; 228860	135620; 139160; 105230; 129820; 154620; 115400; 166140; 112480; 149710	7; 5; 10; 9; 5; 5; 23; 24; 26	6; 5; 5; 6; 5; 4; 6; 7; 7	6; 5; 5; 6; 5; 4; 6; 7; 7	6; 5; 5; 6; 5; 4; 6; 7; 7	6	By MS/MS; By MS/MS; By MS/MS; By MS/MS; By MS/MS; By MS/MS; By MS/MS; By MS/MS; By MS/MS	60; 51; 51; 60.7; 50.3; 51.7; 56.6; 75.9; 66.9	110500; 65298; 172770; 101890; 220190; 101750; 276190; 329610; 247010	148640; 67132; 115750; 82609; 133050; 121400; 136500; 164640; 126450	6; 5; 4; 22; 10; 10; 12; 5; 13
all2436	0.0341891	1	false	truth	0.537138	0.306404	0.250615	0.0742249	0.316199	0.844208	6; 3; 3; 2; 2; 3; 2; 2; 2	6; 3; 3; 2; 2; 3; 2; 2; 2	6; 3; 3; 2; 2; 3; 2; 2; 2	2	By MS/MS; By matching; By MS/MS; By MS/MS; By matching; By MS/MS; By MS/MS; By MS/MS; By MS/MS	11.6; 5.9; 6.2; 4.5; 4.7; 6.7; 3.7; 3.7; 4.5	19767; 12050; 8369.6; 16181; 7578.4; 15837; 7213.1; 9171.8; 7330.3	13725; 5952.8; 0; 0; 0; 6516; 0; 7753.6; 0	1; 0; 3; 1; 0; 1; 3; 2; 1	5; 1; 5; 3; 3; 3; 4; 4; 4	5; 1; 5; 3; 3; 3; 4; 4; 4	5; 1; 5; 3; 3; 3; 4; 4; 4	4	By matching; By MS/MS; By MS/MS; By MS/MS; By MS/MS; By MS/MS; By MS/MS; By matching; By MS/MS	10.8; 2.5; 10.9; 7.4; 5; 5.4; 8.2; 8.1; 7.6	24259; 7212; 31759; 20864; 14648; 40101; 18089; 34275; 23046	9803.1; 0; 19146; 26808; 0; 28504; 8728.8; 17747; 10834	0; 1; 2; 1; 2; 3; 2; 0; 1
all2452	0.321564	1	false	truth	1.6794	1.78872	1.27493	0.153805	0.565474	3.40382	4; 4; 6; 4; 4; 4; 3; 2; 2	4; 4; 6; 4; 4; 4; 3; 2; 2	4; 4; 6; 4; 4; 4; 3; 2; 2	4	By MS/MS; By MS/MS; By MS/MS; By MS/MS; By MS/MS; By MS/MS; By MS/MS; By MS/MS; By MS/MS	17.4; 19.5; 31.2; 17.4; 17.4; 19.5; 14.7; 9.6; 9.6	43629; 44525; 47087; 57188; 57919; 204310; 58510; 42654; 8520.1	34330; 33832; 31454; 35923; 35038; 145250; 23501; 0; 0	7; 4; 10; 13; 7; 3; 5; 2; 2	3; 4; 4; 2; 3; 3; 3; 2; 3	3; 4; 4; 2; 3; 3; 3; 2; 3	3; 4; 4; 2; 3; 3; 3; 2; 3	3	By MS/MS; By MS/MS; By MS/MS; By MS/MS; By MS/MS; By MS/MS; By MS/MS; By MS/MS; By MS/MS	14.4; 17.1; 23.4; 9.9; 14.7; 14.7; 14.7; 9.6; 14.7	29333; 32614; 20179; 20864; 47228; 46898; 18620; 75733; 88758	17777; 31416; 14163; 0; 26714; 0; 0; 0; 48283	2; 6; 4; 1; 3; 3; 4; 1; 2
all2453	0.0844522	1	false	truth	2.35059	2.17862	1.35914	0.070055	1.10718	3.94815	5; 4; 4; 4; 5; 4; 4; 3; 4	5; 4; 4; 4; 5; 4; 4; 3; 4	5; 4; 4; 4; 5; 4; 4; 3; 4	4	By MS/MS; By MS/MS; By MS/MS; By MS/MS; By MS/MS; By MS/MS; By MS/MS; By MS/MS; By MS/MS	27.4; 21.2; 30.2; 26.8; 41.9; 26.8; 26.8; 20.1; 35.8	26916; 14185; 13363; 64734; 67209; 30016; 32889; 3383.6; 33140	45966; 20918; 7906.9; 98074; 99750; 24931; 37770; 10910; 28173	4; 1; 4; 3; 3; 2; 6; 1; 7	1; 4; 3; 1; 4; 5; 2; 2; 4	1; 4; 3; 1; 4; 5; 2; 2; 4	1; 4; 3; 1; 4; 5; 2; 2; 4	3	By MS/MS; By MS/MS; By MS/MS; By MS/MS; By MS/MS; By MS/MS; By MS/MS; By matching; By MS/MS	7.8; 26.8; 29.1; 7.8; 35.8; 41.9; 22.9; 14; 35.2	0; 14489; 26065; 0; 30986; 30974; 17180; 6033.8; 8324.3	0; 22462; 0; 0; 16625; 18153; 10573; 0; 20600	0; 1; 2; 0; 3; 3; 3; 0; 2
all2497	0.298682	1	false	false	0.815346	0.608177	0.880335	0.0985556	0	1.83597	1; 1; 2; 1; 2; 1; 1; 1; 1	1; 1; 2; 1; 2; 1; 1; 1; 1	1; 1; 2; 1; 2; 1; 1; 1; 1	1	By MS/MS; By matching; By MS/MS; By MS/MS; By MS/MS; By matching; By MS/MS; By MS/MS; By MS/MS	3; 4.9; 7.8; 4.9; 7.8; 4.9; 4.9; 4.9; 4.9	0; 5013.4; 3634.9; 0; 2086.8; 3806.9; 1648.2; 5449.3; 0	0; 0; 0; 0; 0; 0; 1741.2; 4211.2; 0	1; 0; 3; 1; 1; 0; 1; 3; 2	0; 0; 1; 2; 1; 1; 1; 1; 1	0; 0; 1; 2; 1; 1; 1; 1; 1	0; 0; 1; 2; 1; 1; 1; 1; 1	1	By matching; By matching; By MS/MS; By MS/MS; By MS/MS; By MS/MS; By matching; By matching; By matching	0; 0; 4.9; 7.8; 4.9; 4.9; 4.9; 4.9; 4.9	0; 0; 0; 19427; 6406.5; 5864.8; 752.53; 2333; 931.05	0; 0; 0; 6791.8; 3793.7; 3887.3; 0; 2322.9; 0	0; 0; 1; 4; 1; 1; 0; 0; 0
all2500	0.0279752	1	false	truth	0.697543	0.212033	0.16492	0.0309941	0.550839	0.888869	2; 0; 1; 3; 2; 0; 3; 4; 4	2; 0; 1; 3; 2; 0; 3; 4; 4	2; 0; 1; 3; 2; 0; 3; 4; 4	2	By MS/MS; By matching; By MS/MS; By MS/MS; By MS/MS; By matching; By MS/MS; By MS/MS; By MS/MS	8.4; 0; 3.5; 11.2; 6.3; 0; 9.3; 11.2; 13.1	6536.2; 0; 6447.7; 29949; 18357; 0; 24359; 18349; 14225	0; 0; 0; 13502; 10614; 0; 13391; 7397.9; 12287	2; 0; 1; 4; 2; 0; 4; 3; 2	1; 1; 2; 5; 3; 4; 4; 3; 6	1; 1; 2; 5; 3; 4; 4; 3; 6	1; 1; 2; 5; 3; 4; 4; 3; 6	3	By matching; By MS/MS; By matching; By MS/MS; By MS/MS; By MS/MS; By MS/MS; By MS/MS; By MS/MS	2.8; 2.6; 5.6; 17.8; 9.1; 12.9; 13.3; 10; 18	5011; 0; 4774.2; 41397; 39501; 35795; 14702; 27166; 45421	0; 0; 8929.2; 21422; 18081; 21705; 0; 17453; 15956	0; 1; 0; 6; 1; 6; 2; 0; 4
all2521	0.147453	1	false	truth	0.781408	0.379935	0.226529	0.0298419	0.574205	1.03668	3; 4; 4; 4; 3; 3; 6; 5; 4	3; 4; 4; 4; 3; 3; 6; 5; 4	3; 4; 4; 4; 3; 3; 6; 5; 4	4	By MS/MS; By MS/MS; By MS/MS; By MS/MS; By MS/MS; By matching; By MS/MS; By MS/MS; By MS/MS	13.5; 17.9; 17.6; 16.9; 14.1; 11.9; 26.3; 22.3; 17.2	17524; 27881; 10511; 13934; 19171; 13733; 32999; 31453; 23475	15900; 15444; 6742.5; 9530.3; 12167; 2080; 15299; 7875; 14685	2; 1; 3; 2; 1; 0; 4; 4; 3	3; 2; 6; 5; 3; 3; 3; 1; 3	3; 2; 6; 5; 3; 3; 3; 1; 3	3; 2; 6; 5; 3; 3; 3; 1; 3	3	By MS/MS; By MS/MS; By MS/MS; By MS/MS; By MS/MS; By MS/MS; By MS/MS; By MS/MS; By MS/MS	12.9; 8.5; 30.1; 21; 13.5; 11.6; 11.9; 3.8; 12.2	8147.6; 8454.3; 32996; 35532; 22830; 21662; 28045; 6528.3; 25428	9268.2; 16709; 8112.8; 15731; 18058; 14292; 18217; 0; 15065	1; 1; 1; 4; 2; 2; 3; 0; 2
all2533	0.231965	1	false	truth	0.890045	0.564042	0.835665	0.850472	0.448062	11.4567	2; 1; 3; 3; 1; 0; 2; 1; 2	2; 1; 3; 3; 1; 0; 2; 1; 2	2; 1; 3; 3; 1; 0; 2; 1; 2	2	By MS/MS; By MS/MS; By MS/MS; By MS/MS; By matching; By matching; By MS/MS; By MS/MS; By MS/MS	3.8; 1.5; 6.4; 6.4; 1.5; 0; 3.8; 1.5; 3.8	12323; 7111.7; 6932.2; 13526; 6917.4; 0; 1663.5; 0; 11325	9649.1; 0; 7914.1; 9257.9; 0; 0; 0; 0; 6639.1	2; 1; 2; 2; 0; 0; 1; 1; 1	1; 2; 1; 3; 0; 2; 1; 0; 3	1; 2; 1; 3; 0; 2; 1; 0; 3	1; 2; 1; 3; 0; 2; 1; 0; 3	1	By matching; By MS/MS; By MS/MS; By MS/MS; By matching; By MS/MS; By MS/MS; By matching; By MS/MS	1.5; 3.8; 2.3; 6.4; 0; 3.8; 2.3; 0; 6.2	6363.9; 7569.6; 0; 25007; 0; 27423; 7374.8; 0; 2645.4	0; 0; 0; 7837.2; 0; 15278; 0; 0; 0	0; 1; 1; 2; 0; 2; 1; 0; 2
all2563	0.75273	1	false	truth	0.909778	0.709645	0.465187	0.182016	0.559469	1.66497	4; 5; 4; 6; 4; 5; 4; 3; 3	4; 5; 4; 6; 4; 5; 4; 3; 3	4; 5; 4; 6; 4; 5; 4; 3; 3	4	By MS/MS; By MS/MS; By MS/MS; By MS/MS; By MS/MS; By matching; By MS/MS; By MS/MS; By MS/MS	13.9; 16.6; 14.8; 19.6; 13.6; 16.9; 15.7; 11.7; 14.8	6558.8; 57162; 38077; 53696; 61935; 41370; 36650; 39443; 0	0; 38794; 0; 14568; 33174; 12769; 25302; 27331; 0	3; 2; 4; 5; 1; 0; 4; 4; 3	3; 5; 5; 4; 6; 3; 5; 4; 5	3; 5; 5; 4; 6; 3; 5; 4; 5	3; 5; 5; 4; 6; 3; 5; 4; 5	5	By MS/MS; By MS/MS; By MS/MS; By MS/MS; By MS/MS; By MS/MS; By MS/MS; By MS/MS; By MS/MS	9; 21.4; 21.1; 14.8; 23.5; 10.2; 20.5; 14.8; 21.4	16195; 34671; 34354; 118520; 122950; 802.96; 48243; 66602; 17608	21996; 14461; 18713; 55366; 58406; 0; 7273.3; 41790; 11851	3; 3; 2; 3; 3; 2; 3; 2; 2
all2568	0.916554	1	false	false	1.02145	0.483837	0.743943	0.181729	0.395175	2.10143	0; 1; 1; 5; 1; 1; 2; 1; 4	0; 1; 1; 5; 1; 1; 2; 1; 4	0; 1; 1; 5; 1; 1; 2; 1; 4	1	By matching; By matching; By MS/MS; By MS/MS; By MS/MS; By matching; By MS/MS; By MS/MS; By MS/MS	0; 4.1; 4.1; 28.6; 6.1; 4.1; 12.7; 5.7; 25.3	0; 4434; 0; 18553; 10089; 11642; 3348.1; 0; 6860.5	0; 0; 0; 9456; 0; 0; 0; 0; 5863.4	0; 0; 1; 3; 1; 0; 2; 1; 3	0; 2; 0; 2; 1; 2; 1; 1; 2	0; 2; 0; 2; 1; 2; 1; 1; 2	0; 2; 0; 2; 1; 2; 1; 1; 2	1	By matching; By matching; By matching; By MS/MS; By MS/MS; By matching; By MS/MS; By MS/MS; By MS/MS	0; 10.2; 0; 12.7; 8.6; 14.7; 4.1; 4.1; 12.7	0; 6898.8; 0; 2340.2; 12548; 8763.4; 13544; 11168; 12851	0; 5374.1; 0; 0; 0; 7262.2; 0; 0; 9369.1	0; 0; 0; 1; 1; 0; 1; 0; 1
all2674	0.718686	1	false	truth	1.12806	0.953764	0.666648	0.210085	0.620226	2.23593	4; 6; 3; 2; 2; 3; 1; 1; 3	4; 6; 3; 2; 2; 3; 1; 1; 3	4; 6; 3; 2; 2; 3; 1; 1; 3	3	By matching; By matching; By matching; By matching; By matching; By matching; By matching; By matching; By MS/MS	7.3; 11.5; 5.2; 3.8; 4.3; 4.8; 1.2; 1.4; 5.4	74380; 137380; 91603; 29423; 5749.5; 15589; 2790.2; 109690; 162890	36521; 40055; 74669; 25395; 0; 34291; 0; 0; 84184	0; 0; 0; 0; 0; 0; 0; 0; 1	5; 5; 4; 2; 2; 7; 4; 4; 1	5; 5; 4; 2; 2; 7; 4; 4; 1	5; 5; 4; 2; 2; 7; 4; 4; 1	4	By matching; By matching; By matching; By matching; By matching; By MS/MS; By matching; By matching; By matching	10.3; 10.4; 7.5; 4.2; 3.8; 14; 7.6; 8.2; 1.4	83166; 11719; 105870; 2223.1; 19106; 166040; 114910; 110870; 89171	27871; 15251; 80635; 0; 8602.1; 40378; 59266; 87637; 0	0; 0; 0; 0; 0; 1; 0; 0; 0
all2777	0.994895	1	false	truth	1.00153	0.607177	0.418845	0.103637	0.660021	1.57462	3; 1; 2; 3; 1; 2; 2; 2; 3	3; 1; 2; 3; 1; 2; 2; 2; 3	3; 1; 2; 3; 1; 2; 2; 2; 3	2	By MS/MS; By MS/MS; By MS/MS; By MS/MS; By MS/MS; By MS/MS; By MS/MS; By MS/MS; By MS/MS	56.6; 18.2; 28.3; 56.6; 10.1; 28.3; 28.3; 28.3; 56.6	6617.1; 3566.3; 95541; 221.64; 67395; 107100; 62892; 61871; 14643	0; 0; 37061; 0; 0; 47147; 47126; 43968; 17563	3; 2; 3; 3; 1; 3; 4; 3; 4	2; 2; 2; 2; 3; 3; 3; 2; 3	2; 2; 2; 2; 3; 3; 3; 2; 3	2; 2; 2; 2; 3; 3; 3; 2; 3	2	By MS/MS; By MS/MS; By MS/MS; By MS/MS; By MS/MS; By MS/MS; By MS/MS; By matching; By MS/MS	28.3; 28.3; 28.3; 28.3; 56.6; 56.6; 56.6; 28.3; 56.6	101770; 134580; 178540; 18658; 21953; 120550; 0; 132170; 139240	34259; 63672; 58418; 16379; 17187; 31985; 0; 53947; 33453	1; 4; 4; 4; 4; 4; 3; 0; 3
all2846	0.873181	1	false	truth	1.01758	0.261395	0.195905	0.0213404	0.840498	1.23903	3; 5; 6; 3; 5; 3; 3; 4; 3	3; 5; 6; 3; 5; 3; 3; 4; 3	3; 5; 6; 3; 5; 3; 3; 4; 3	3	By MS/MS; By MS/MS; By MS/MS; By MS/MS; By matching; By matching; By MS/MS; By MS/MS; By MS/MS	6.5; 11.7; 15.9; 8.7; 14.1; 9.4; 8.5; 13.5; 7.8	12986; 52507; 33087; 20842; 26627; 8621.2; 28271; 26885; 5815.8	22085; 25458; 23603; 21886; 12801; 0; 23917; 18500; 0	2; 3; 5; 5; 0; 0; 2; 2; 3	5; 3; 4; 1; 2; 5; 3; 0; 3	5; 3; 4; 1; 2; 5; 3; 0; 3	5; 3; 4; 1; 2; 5; 3; 0; 3	3	By MS/MS; By MS/MS; By MS/MS; By MS/MS; By MS/MS; By MS/MS; By MS/MS; By matching; By MS/MS	12; 7; 9.4; 3; 7.4; 13.3; 7.8; 0; 6.9	22100; 7223.9; 32497; 56738; 8832.6; 76362; 27159; 0; 9047.8	19051; 20451; 24404; 0; 0; 21255; 18414; 0; 0	1; 2; 1; 1; 1; 5; 2; 0; 1
all2906	0.998281	1	false	truth	1.00029	0.378308	0.228367	0.0295214	0.796911	1.26452	8; 5; 6; 9; 6; 8; 8; 5; 9	8; 5; 6; 9; 6; 8; 8; 5; 9	8; 5; 6; 9; 6; 8; 8; 5; 9	8	By MS/MS; By MS/MS; By MS/MS; By MS/MS; By MS/MS; By MS/MS; By MS/MS; By MS/MS; By MS/MS	32.8; 23.8; 21.8; 35.1; 26.9; 34.1; 36.4; 20.5; 36.2	56689; 60064; 34705; 54285; 39305; 70320; 37626; 38955; 59306	44848; 34642; 46149; 44995; 44631; 31844; 30028; 50110; 27559	8; 4; 4; 8; 7; 6; 9; 5; 5	5; 1; 6; 9; 6; 10; 10; 6; 10	5; 1; 6; 9; 6; 10; 10; 6; 10	5; 1; 6; 9; 6; 10; 10; 6; 10	6	By matching; By matching; By MS/MS; By MS/MS; By MS/MS; By MS/MS; By MS/MS; By MS/MS; By MS/MS	17.7; 3.3; 24.1; 39; 29; 46.9; 38.5; 21.8; 43.3	8318.5; 0; 52306; 100570; 131430; 153820; 105680; 40733; 86183	17344; 0; 36106; 54516; 52710; 53907; 40475; 48593; 36595	0; 0; 2; 12; 8; 13; 14; 2; 8
all2915	0.394162	1	false	false	1.08346	0.182246	#N/A	0.0391746	#N/A	#N/A	1; 1; 1; 2; 1; 1; 0; 0; 2	1; 1; 1; 2; 1; 1; 0; 0; 2	1; 1; 1; 2; 1; 1; 0; 0; 2	1	By matching; By MS/MS; By MS/MS; By MS/MS; By MS/MS; By matching; By matching; By matching; By MS/MS	4.5; 3.2; 3.2; 5.9; 4.5; 2.7; 0; 0; 5.9	2480.7; 6917.5; 9271.9; 26890; 7707.9; 5288.8; 0; 0; 4065.9	0; 0; 0; 16038; 0; 0; 0; 0; 0	0; 1; 0; 3; 1; 0; 0; 0; 1	2; 2; 1; 1; 2; 1; 2; 1; 1	2; 2; 1; 1; 2; 1; 2; 1; 1	2; 2; 1; 1; 2; 1; 2; 1; 1	1	By MS/MS; By MS/MS; By MS/MS; By MS/MS; By matching; By MS/MS; By MS/MS; By matching; By MS/MS	5.7; 5.9; 3.2; 3.2; 5.9; 2.7; 7.7; 2.7; 2.7	8888.9; 9464.6; 8200.7; 12192; 22111; 8528.3; 22881; 6783.6; 7649.3	12353; 11988; 0; 0; 13333; 0; 22210; 0; 0	1; 1; 1; 2; 0; 2; 1; 0; 1
all3032	0.518695	1	false	truth	1.09596	0.799021	#N/A	1.07674	#N/A	#N/A	1; 1; 3; 4; 2; 1; 2; 3; 3	1; 1; 3; 4; 2; 1; 2; 3; 3	1; 1; 3; 4; 2; 1; 2; 3; 3	2	By MS/MS; By MS/MS; By matching; By MS/MS; By matching; By matching; By MS/MS; By MS/MS; By MS/MS	6.6; 6.6; 24.9; 22.3; 10.2; 6.6; 15.2; 16.8; 15.7	0; 2762.3; 22295; 19670; 14064; 4810.4; 1104.9; 8735.8; 10765	0; 0; 0; 7908.7; 7297.7; 0; 0; 4890.3; 5414.8	2; 1; 0; 2; 0; 0; 1; 2; 1	3; 2; 2; 1; 3; 2; 1; 1; 1	3; 2; 2; 1; 3; 2; 1; 1; 1	3; 2; 2; 1; 3; 2; 1; 1; 1	2	By MS/MS; By MS/MS; By matching; By matching; By matching; By matching; By matching; By matching; By MS/MS	21.8; 12.2; 11.2; 5.6; 22.8; 11.2; 4.6; 5.6; 6.6	3039.2; 6622.2; 7117.7; 348.28; 20215; 7199.4; 3239.9; 205.24; 3306.5	0; 8315.6; 0; 0; 0; 3412.4; 0; 0; 0	2; 1; 0; 0; 0; 0; 0; 0; 1
all3041	0.845505	1	false	truth	0.957736	0.608079	0.365361	0.0746022	0.647373	1.42252	6; 5; 5; 3; 7; 6; 2; 6; 1	6; 5; 5; 3; 7; 6; 2; 6; 1	6; 5; 5; 3; 7; 6; 2; 6; 1	5	By matching; By matching; By matching; By matching; By matching; By matching; By matching; By MS/MS; By matching	8.5; 6.5; 5.8; 3.2; 10.1; 8.2; 3.8; 8.3; 1.6	39300; 361260; 35604; 71710; 22481; 19175; 5478.3; 18867; 2659.3	9434.8; 11989; 10432; 12808; 6631.8; 4771.6; 3362.7; 5387.8; 0	0; 0; 0; 0; 0; 0; 0; 1; 0	6; 5; 5; 6; 4; 8; 4; 3; 6	6; 5; 5; 6; 4; 8; 4; 3; 6	6; 5; 5; 6; 4; 8; 4; 3; 6	5	By matching; By matching; By matching; By matching; By matching; By MS/MS; By matching; By matching; By matching	8; 5.9; 6.4; 8.7; 7.4; 11.2; 4.5; 5.1; 6.6	208430; 12936; 22178; 29659; 10327; 25355; 18630; 12894; 28227	14571; 4651.7; 7909.1; 5845.5; 7197.1; 13533; 5524.5; 10827; 7791.7	0; 0; 0; 0; 0; 2; 0; 0; 0
all3054	0.715435	1	false	false	1.35818	1.52944	2.11224	0.23288	0	4.21712	1; 1; 1; 1; 2; 1; 4; 2; 3	1; 1; 1; 1; 2; 1; 4; 2; 3	1; 1; 1; 1; 2; 1; 4; 2; 3	1	By MS/MS; By matching; By MS/MS; By MS/MS; By MS/MS; By matching; By MS/MS; By MS/MS; By MS/MS	1.2; 1.9; 1.2; 1.2; 3.1; 1.9; 6.6; 3.1; 3.5	9300.4; 4310.7; 8077; 11277; 13168; 2180.7; 24285; 145750; 23310	0; 0; 0; 0; 0; 0; 16742; 88217; 16074	1; 0; 1; 3; 0; 0; 4; 3; 3	0; 1; 1; 1; 3; 2; 0; 1; 2	0; 1; 1; 1; 3; 2; 0; 1; 2	0; 1; 1; 1; 3; 2; 0; 1; 2	1	By matching; By matching; By matching; By MS/MS; By MS/MS; By MS/MS; By matching; By matching; By matching	0; 1.2; 1.9; 1.2; 4.5; 3.1; 0; 1.9; 2.3	0; 4191.2; 466.22; 19144; 17781; 96333; 0; 1489.5; 48693	0; 0; 0; 0; 33488; 0; 0; 0; 22067	0; 0; 0; 1; 0; 2; 0; 0; 0
all3076	0.218488	1	false	truth	1.73997	1.60681	1.33758	0.372406	0.793355	4.75153	3; 3; 2; 3; 4; 3; 3; 4; 4	3; 3; 2; 3; 4; 3; 3; 4; 4	3; 3; 2; 3; 4; 3; 3; 4; 4	3	By MS/MS; By MS/MS; By matching; By MS/MS; By MS/MS; By MS/MS; By MS/MS; By MS/MS; By MS/MS	18.7; 16.7; 8.1; 15; 23.2; 15.9; 17.1; 22.8; 18.7	4738; 21681; 19023; 21382; 14947; 7523.8; 11902; 10557; 20276	24609; 18398; 10607; 38136; 5446.7; 0; 14389; 7510; 6236.3	2; 1; 0; 2; 2; 1; 2; 3; 2	3; 0; 2; 0; 0; 1; 2; 3; 2	3; 0; 2; 0; 0; 1; 2; 3; 2	3; 0; 2; 0; 0; 1; 2; 3; 2	2	By MS/MS; By matching; By MS/MS; By matching; By matching; By matching; By MS/MS; By matching; By MS/MS	13.8; 0; 14.2; 0; 0; 6.1; 11; 14.2; 11.8	4463.8; 0; 21892; 0; 0; 3172.6; 3730.9; 7952.6; 8866	9076.5; 0; 12623; 0; 0; 0; 0; 3377; 0	1; 0; 2; 0; 0; 0; 1; 0; 1
all3093	0.886765	1	false	truth	1.0352	0.570919	0.430303	0.0579688	0.651	1.5468	3; 3; 0; 4; 2; 5; 2; 1; 2	3; 3; 0; 4; 2; 5; 2; 1; 2	3; 3; 0; 4; 2; 5; 2; 1; 2	2	By MS/MS; By MS/MS; By matching; By MS/MS; By matching; By MS/MS; By matching; By MS/MS; By matching	9.9; 8.5; 0; 13; 5.9; 14.4; 5.7; 3; 6.7	13373; 15706; 0; 33573; 41670; 86188; 47504; 38034; 54673	14170; 16998; 0; 30711; 0; 23066; 0; 0; 0	4; 1; 0; 6; 0; 3; 0; 1; 0	3; 3; 3; 5; 6; 5; 3; 5; 4	3; 3; 3; 5; 6; 5; 3; 5; 4	3; 3; 3; 5; 6; 5; 3; 5; 4	4	By MS/MS; By MS/MS; By MS/MS; By MS/MS; By MS/MS; By MS/MS; By MS/MS; By MS/MS; By MS/MS	10.7; 8.7; 9.1; 15.4; 20.8; 15.4; 10.7; 15.4; 11.5	14984; 9800.8; 9185.4; 74902; 66004; 69742; 29643; 67283; 38368	19907; 18980; 10389; 19347; 17610; 32177; 15970; 21217; 34419	2; 3; 2; 3; 2; 2; 1; 2; 4
all3116	0.230179	1	false	truth	1.17285	0.644591	0.786199	0.0604616	0.43372	2.06293	4; 3; 1; 5; 1; 2; 3; 4; 6	4; 3; 1; 5; 1; 2; 3; 4; 6	4; 3; 1; 5; 1; 2; 3; 4; 6	3	By MS/MS; By MS/MS; By matching; By MS/MS; By MS/MS; By MS/MS; By MS/MS; By MS/MS; By MS/MS	21.6; 15.5; 5.3; 28.2; 5.7; 11.4; 15.9; 26.9; 37.6	23770; 16062; 7899.1; 9128.9; 7421.2; 14490; 17855; 8223.8; 11309	14456; 0; 0; 0; 0; 0; 0; 0; 7533.1	2; 1; 0; 4; 1; 0; 3; 4; 5	2; 1; 3; 3; 2; 4; 3; 3; 1	2; 1; 3; 3; 2; 4; 3; 3; 1	2; 1; 3; 3; 2; 4; 3; 3; 1	3	By matching; By MS/MS; By matching; By MS/MS; By MS/MS; By MS/MS; By MS/MS; By matching; By MS/MS	11; 4.5; 15.5; 16.7; 11.8; 22.4; 18; 17.6; 6.5	12753; 0; 11155; 11474; 19203; 9065.9; 23885; 24394; 7033.5	10544; 0; 8699.6; 10987; 0; 6581; 8895.5; 14002; 0	0; 1; 0; 1; 1; 2; 0; 0; 1
all3144	0.126569	1	false	truth	0.738917	0.384555	0.24669	0.0422349	0.517333	1.02567	4; 3; 4; 3; 2; 4; 5; 5; 3	4; 3; 4; 3; 2; 4; 5; 5; 3	4; 3; 4; 3; 2; 4; 5; 5; 3	4	By MS/MS; By MS/MS; By MS/MS; By MS/MS; By matching; By MS/MS; By MS/MS; By MS/MS; By MS/MS	14.1; 10.7; 12.8; 9.8; 7.5; 14.8; 18.7; 16.6; 10.3	28629; 14330; 26155; 34103; 6456; 21790; 10747; 20233; 7846.2	17029; 15321; 11115; 23749; 5958.1; 11812; 13234; 24615; 0	4; 1; 4; 2; 0; 1; 6; 4; 1	2; 5; 3; 4; 4; 7; 4; 5; 5	2; 5; 3; 4; 4; 7; 4; 5; 5	2; 5; 3; 4; 4; 7; 4; 5; 5	4	By MS/MS; By MS/MS; By MS/MS; By MS/MS; By MS/MS; By MS/MS; By MS/MS; By MS/MS; By MS/MS	6.6; 16.2; 12.8; 12.5; 12.3; 25.3; 12.5; 17.3; 16.6	21709; 31343; 0; 45102; 3659.9; 33100; 48003; 65648; 36689	24720; 16064; 0; 21159; 0; 13051; 28959; 29066; 21168	2; 3; 4; 4; 3; 6; 5; 4; 6
all3149	0.288571	1	false	truth	0.815456	0.357252	0.276911	0.026968	0.556426	1.11969	1; 1; 2; 3; 3; 4; 3; 3; 1	1; 1; 2; 3; 3; 4; 3; 3; 1	1; 1; 2; 3; 3; 4; 3; 3; 1	3	By matching; By MS/MS; By MS/MS; By MS/MS; By MS/MS; By MS/MS; By MS/MS; By MS/MS; By MS/MS	6.3; 6; 9.7; 13.5; 15; 21.3; 15; 15; 6	15007; 0; 5012.1; 17375; 19226; 28761; 25925; 13029; 8387	0; 0; 8655.3; 7540.5; 15117; 18090; 19356; 0; 0	0; 2; 1; 2; 3; 3; 5; 3; 3	1; 3; 3; 4; 3; 3; 5; 2; 3	1; 3; 3; 4; 3; 3; 5; 2; 3	1; 3; 3; 4; 3; 3; 5; 2; 3	3	By MS/MS; By MS/MS; By MS/MS; By MS/MS; By MS/MS; By MS/MS; By MS/MS; By MS/MS; By MS/MS	6; 16; 12.9; 15; 17.6; 11.3; 21.3; 11.3; 15.4	5288.6; 9024.4; 18520; 57698; 46609; 43141; 29355; 25823; 25284	0; 16192; 0; 23537; 22716; 22175; 13785; 15991; 14204	2; 3; 1; 5; 4; 4; 4; 0; 4
all3184	0.103568	1	false	truth	2.16548	2.38821	1.63783	0.356383	0.996935	5.73216	4; 3; 2; 4; 4; 5; 4; 2; 3	4; 3; 2; 4; 4; 5; 4; 2; 3	4; 3; 2; 4; 4; 5; 4; 2; 3	4	By MS/MS; By matching; By MS/MS; By MS/MS; By MS/MS; By MS/MS; By MS/MS; By MS/MS; By MS/MS	31.5; 21.1; 20.2; 32.9; 32.9; 36.2; 33.3; 20.2; 24.9	16758; 18226; 3709.8; 20542; 102720; 131160; 32214; 96919; 30779	16015; 12927; 0; 20553; 23131; 36696; 55964; 91427; 35440	1; 0; 1; 4; 2; 4; 7; 4; 4	3; 1; 2; 2; 2; 2; 1; 3; 2	3; 1; 2; 2; 2; 2; 1; 3; 2	3; 1; 2; 2; 2; 2; 1; 3; 2	2	By MS/MS; By matching; By matching; By MS/MS; By MS/MS; By MS/MS; By matching; By matching; By MS/MS	24.9; 7; 20.2; 20.2; 20.2; 16.4; 9.4; 22.5; 20.2	11153; 4820.2; 6677.8; 26513; 34523; 15201; 3250.4; 21230; 18536	0; 0; 10525; 19581; 41539; 10796; 0; 10007; 11471	1; 0; 0; 1; 4; 1; 0; 0; 1
all3332	0.228688	1	false	truth	0.638254	0.306228	#N/A	0.318728	#N/A	#N/A	0; 1; 1; 1; 1; 3; 0; 0; 0	0; 1; 1; 1; 1; 3; 0; 0; 0	0; 1; 1; 1; 1; 3; 0; 0; 0	1	By matching; By matching; By matching; By matching; By MS/MS; By MS/MS; By matching; By matching; By matching	0; 5.3; 5.3; 6.3; 10.7; 22.3; 0; 0; 0	0; 22618; 24619; 10609; 0; 19586; 0; 0; 0	0; 0; 0; 0; 0; 7757.4; 0; 0; 0	0; 0; 0; 0; 1; 1; 0; 0; 0	2; 2; 3; 2; 0; 1; 0; 0; 2	2; 2; 3; 2; 0; 1; 0; 0; 2	2; 2; 3; 2; 0; 1; 0; 0; 2	2	By matching; By matching; By MS/MS; By MS/MS; By matching; By MS/MS; By matching; By matching; By MS/MS	11.7; 11.7; 22.3; 17; 0; 10.7; 0; 0; 17	11641; 18216; 35954; 14432; 0; 1607.7; 0; 0; 2959.7	9210.8; 16069; 18674; 8150.7; 0; 0; 0; 0; 0	0; 0; 1; 1; 0; 1; 0; 0; 1
all3375	0.61593	1	false	truth	1.17888	0.673772	0.737615	0.23961	0.626501	2.47422	3; 3; 2; 4; 2; 2; 5; 2; 6	3; 3; 2; 4; 2; 2; 5; 2; 6	3; 3; 2; 4; 2; 2; 5; 2; 6	3	By MS/MS; By MS/MS; By MS/MS; By MS/MS; By MS/MS; By MS/MS; By MS/MS; By MS/MS; By MS/MS	4.7; 4.4; 2.7; 5.5; 2.5; 2.9; 9.2; 4.1; 10.1	4694.9; 20629; 7565.2; 9306.3; 0; 75724; 14934; 8792.6; 18627	9701.9; 30650; 0; 0; 0; 0; 22935; 0; 20702	1; 1; 1; 1; 2; 0; 4; 3; 3	2; 3; 2; 5; 5; 4; 1; 1; 1	2; 3; 2; 5; 5; 4; 1; 1; 1	2; 3; 2; 5; 5; 4; 1; 1; 1	2	By matching; By MS/MS; By MS/MS; By MS/MS; By MS/MS; By MS/MS; By MS/MS; By matching; By matching	3.9; 4.2; 2.9; 6.9; 7.8; 6.3; 1.5; 2.2; 1.5	3346.4; 0; 11524; 8624.6; 17130; 20961; 0; 2894.6; 0	0; 0; 0; 12218; 19124; 22601; 0; 0; 0	0; 1; 0; 2; 2; 3; 1; 0; 0
all3401	0.43099	1	false	truth	0.672445	0.68037	0.553405	0.415375	0.282969	2.01747	1; 2; 1; 2; 1; 3; 3; 1; 3	1; 2; 1; 2; 1; 3; 3; 1; 3	1; 2; 1; 2; 1; 3; 3; 1; 3	2	By MS/MS; By MS/MS; By MS/MS; By MS/MS; By MS/MS; By matching; By MS/MS; By MS/MS; By MS/MS	2.1; 4.1; 2.1; 3.4; 2.1; 5.4; 5.4; 2.1; 5.4	3323.1; 10990; 8308.3; 2966.3; 4255.2; 17001; 5406; 0; 6055	0; 10066; 0; 0; 0; 6634.1; 4665.9; 0; 2250	2; 2; 1; 2; 0; 0; 4; 1; 2	1; 2; 2; 2; 2; 3; 3; 2; 0	1; 2; 2; 2; 2; 3; 3; 2; 0	1; 2; 2; 2; 2; 3; 3; 2; 0	2	By MS/MS; By MS/MS; By matching; By matching; By matching; By MS/MS; By matching; By matching; By matching	2.1; 4.1; 3.4; 3.4; 3.4; 5.4; 5.4; 3.4; 0	0; 2603.7; 5638.3; 16354; 32078; 32633; 8393.9; 10065; 0	0; 0; 4699.5; 5377.2; 19356; 13684; 1777.5; 7517.9; 0	1; 2; 0; 0; 0; 4; 0; 0; 0
all3509	0.962234	1	false	truth	1.01242	0.522721	0.478205	0.15867	0.648135	1.75857	1; 3; 2; 2; 4; 3; 1; 2; 4	1; 3; 2; 2; 4; 3; 1; 2; 4	1; 3; 2; 2; 4; 3; 1; 2; 4	2	By MS/MS; By MS/MS; By MS/MS; By MS/MS; By MS/MS; By matching; By MS/MS; By MS/MS; By MS/MS	3.2; 13.3; 9.2; 10.4; 16.8; 10.4; 6; 6.3; 13	8517.4; 8352.6; 10630; 5954; 9590.8; 7141.2; 1937.5; 0; 20824	0; 7800.8; 7626.5; 0; 5479.1; 3114.1; 0; 0; 6603.4	1; 1; 1; 2; 1; 0; 2; 3; 3	2; 0; 1; 3; 3; 3; 3; 1; 3	2; 0; 1; 3; 3; 3; 3; 1; 3	2; 0; 1; 3; 3; 3; 3; 1; 3	3	By MS/MS; By matching; By MS/MS; By MS/MS; By MS/MS; By MS/MS; By MS/MS; By matching; By MS/MS	7.6; 0; 3.2; 12.7; 9.5; 13.3; 13.6; 6; 10.4	5257.2; 0; 5653.6; 6518.1; 16009; 32356; 17432; 693.42; 3231.9	0; 0; 0; 0; 4370.3; 11067; 6924.6; 0; 3920.4	1; 0; 0; 3; 1; 1; 1; 0; 1
all3526	0.282854	1	false	truth	0.50513	0.512082	0.461635	0.487086	0.181338	1.78831	2; 3; 4; 2; 2; 3; 2; 0; 3	2; 3; 4; 2; 2; 3; 2; 0; 3	2; 3; 4; 2; 2; 3; 2; 0; 3	2	By MS/MS; By MS/MS; By MS/MS; By matching; By matching; By matching; By matching; By matching; By matching	6.9; 9.9; 13; 5.9; 7.4; 9.9; 7.6; 0; 12.5	5619.3; 72635; 68163; 430760; 13065; 14011; 7449.4; 0; 9359.6	24570; 0; 57391; 0; 0; 24347; 23212; 0; 11008	3; 1; 2; 0; 0; 0; 0; 0; 0	3; 4; 2; 3; 2; 3; 2; 1; 2	3; 4; 2; 3; 2; 3; 2; 1; 2	3; 4; 2; 3; 2; 3; 2; 1; 2	2	By matching; By matching; By matching; By MS/MS; By MS/MS; By MS/MS; By MS/MS; By matching; By MS/MS	8.7; 13; 7.1; 10.2; 7.1; 9.7; 7.4; 3.1; 7.6	287090; 77620; 482760; 32501; 23721; 30250; 12185; 3971.2; 2947.4	99306; 36226; 63400; 0; 0; 0; 15711; 0; 0	0; 0; 0; 1; 1; 1; 2; 0; 1
all3538	0.116658	1	false	truth	0.821047	0.299604	0.174358	0.0153739	0.657686	1.01005	9; 7; 10; 11; 6; 9; 6; 10; 6	9; 7; 10; 11; 6; 9; 6; 10; 6	9; 7; 10; 11; 6; 9; 6; 10; 6	9	By MS/MS; By MS/MS; By MS/MS; By MS/MS; By MS/MS; By MS/MS; By MS/MS; By MS/MS; By MS/MS	29.1; 23.8; 32.9; 36.8; 24; 30.3; 20; 36.8; 21.4	99269; 84683; 66603; 97193; 43005; 149420; 47993; 104900; 15884	59695; 49006; 56549; 53092; 52061; 49260; 38504; 62809; 20426	17; 10; 17; 13; 10; 5; 7; 10; 7	7; 10; 6; 10; 8; 9; 10; 7; 8	7; 10; 6; 10; 8; 9; 10; 7; 8	7; 10; 6; 10; 8; 9; 10; 7; 8	8	By MS/MS; By MS/MS; By MS/MS; By MS/MS; By MS/MS; By MS/MS; By MS/MS; By MS/MS; By MS/MS	23.8; 32.4; 23.5; 29.8; 26.8; 37.1; 36.1; 26.8; 28.4	75794; 37238; 81613; 97084; 160590; 191350; 101230; 104220; 92819	45049; 40298; 52663; 76184; 77770; 84732; 66397; 67359; 59594	9; 11; 5; 12; 9; 9; 9; 4; 10
all3555	0.0211457	1	false	truth	0.703371	0.255186	0.174428	0.0146068	0.537772	0.889822	0; 2; 2; 3; 1; 3; 2; 1; 3	0; 2; 2; 3; 1; 3; 2; 1; 3	0; 2; 2; 3; 1; 3; 2; 1; 3	2	By matching; By matching; By MS/MS; By MS/MS; By MS/MS; By MS/MS; By MS/MS; By MS/MS; By MS/MS	0; 4.9; 4.9; 8.2; 2.2; 9; 6.2; 4; 9.5	0; 20210; 12091; 10755; 35560; 9207.7; 20759; 6046; 11882	0; 20154; 17938; 17154; 0; 10124; 20283; 0; 8595.3	0; 0; 1; 1; 1; 2; 2; 1; 4	4; 3; 3; 4; 5; 3; 4; 3; 3	4; 3; 3; 4; 5; 3; 4; 3; 3	4; 3; 3; 4; 5; 3; 4; 3; 3	3	By MS/MS; By MS/MS; By MS/MS; By MS/MS; By MS/MS; By MS/MS; By MS/MS; By matching; By MS/MS	11.5; 9; 7.5; 13.3; 14.8; 9.5; 12.1; 8.8; 9	8329; 24555; 21150; 55821; 75151; 67193; 36730; 29090; 50710	14391; 21668; 20132; 25076; 26141; 30710; 20662; 26775; 19600	1; 4; 1; 4; 3; 5; 5; 0; 4
all3556	0.00852777	1	false	truth	0.600473	0.275928	0.173663	0.0347771	0.444026	0.800191	4; 5; 6; 5; 2; 3; 5; 3; 4	4; 5; 6; 5; 2; 3; 5; 3; 4	4; 5; 6; 5; 2; 3; 5; 3; 4	4	By MS/MS; By MS/MS; By MS/MS; By MS/MS; By MS/MS; By MS/MS; By MS/MS; By MS/MS; By MS/MS	12.7; 17.4; 20; 14.7; 6.2; 8.8; 21.8; 10.3; 12.7	51183; 63684; 58639; 35425; 13170; 22026; 39021; 7269.9; 10961	22497; 37255; 26704; 21444; 0; 13980; 23876; 0; 13230	5; 3; 4; 3; 2; 0; 4; 4; 3	7; 8; 6; 6; 6; 8; 8; 4; 6	7; 8; 6; 6; 6; 8; 8; 4; 6	7; 8; 6; 6; 6; 8; 8; 4; 6	6	By MS/MS; By MS/MS; By MS/MS; By MS/MS; By MS/MS; By MS/MS; By MS/MS; By MS/MS; By MS/MS	23.3; 25.5; 19.3; 18.5; 20.2; 29.7; 27; 12.7; 18	50761; 29846; 27972; 65870; 100330; 79413; 66005; 18349; 44576	33367; 42121; 31440; 38614; 54322; 42344; 48393; 16786; 36300	5; 5; 4; 5; 3; 9; 8; 2; 5
all3570	0.162868	1	false	truth	1.21679	0.510213	0.296924	0.0463942	0.96622	1.58576	9; 8; 8; 7; 7; 8; 6; 6; 8	9; 8; 8; 7; 7; 8; 6; 6; 8	9; 8; 8; 7; 7; 8; 6; 6; 8	8	By MS/MS; By MS/MS; By MS/MS; By MS/MS; By MS/MS; By MS/MS; By MS/MS; By MS/MS; By MS/MS	50.9; 50.9; 50.9; 73.4; 50.3; 45; 42; 42; 72.8	163080; 207050; 87935; 272770; 245370; 51545; 141350; 153550; 154960	95473; 92244; 76940; 102690; 125520; 83240; 76249; 103120; 97085	15; 11; 12; 11; 6; 6; 11; 10; 10	9; 9; 8; 7; 4; 7; 7; 4; 8	9; 9; 8; 7; 4; 7; 7; 4; 8	9; 9; 8; 7; 4; 7; 7; 4; 8	7	By MS/MS; By MS/MS; By MS/MS; By MS/MS; By MS/MS; By MS/MS; By MS/MS; By MS/MS; By MS/MS	50.9; 50.9; 50.9; 45.6; 28.4; 45.6; 50.3; 33.7; 72.8	136700; 138650; 99923; 54865; 161800; 174590; 156690; 92971; 153070	73991; 83982; 77903; 16730; 113380; 94163; 81226; 90048; 74678	11; 12; 9; 5; 4; 6; 7; 2; 7
all3642	0.458914	1	false	truth	1.1182	0.505728	0.294314	0.0539973	0.872769	1.49128	10; 7; 8; 7; 9; 7; 11; 10; 11	10; 7; 8; 7; 9; 7; 11; 10; 11	5; 4; 6; 5; 5; 5; 7; 6; 7	5	By MS/MS; By MS/MS; By MS/MS; By MS/MS; By MS/MS; By MS/MS; By MS/MS; By MS/MS; By MS/MS	21; 19.7; 18.8; 17.2; 22.3; 17; 27.7; 21.7; 24.8	73370; 47889; 80575; 63805; 81058; 99330; 53657; 145300; 90184	39105; 44646; 41654; 52233; 46596; 53191; 44999; 68308; 47104	14; 11; 9; 12; 15; 4; 11; 12; 11	9; 6; 4; 9; 7; 11; 8; 9; 6	9; 6; 4; 9; 7; 11; 8; 9; 6	6; 5; 2; 6; 5; 6; 7; 5; 5	5	By MS/MS; By MS/MS; By MS/MS; By MS/MS; By MS/MS; By MS/MS; By MS/MS; By MS/MS; By MS/MS	22.6; 16.6; 11.5; 23.4; 18.3; 28.8; 20.4; 18.8; 15.1	55678; 45857; 12350; 120000; 109700; 123520; 97390; 76280; 50902	29029; 32724; 13819; 70952; 68960; 70571; 55880; 40043; 38368	5; 9; 6; 10; 6; 9; 7; 1; 5
all3653	0.328729	1	false	truth	1.14464	0.46653	0.271502	0.0352683	0.906916	1.46606	12; 11; 11; 10; 10; 10; 10; 11; 11	12; 11; 11; 10; 10; 10; 10; 11; 11	12; 11; 11; 10; 10; 10; 10; 11; 11	11	By MS/MS; By MS/MS; By MS/MS; By MS/MS; By MS/MS; By MS/MS; By MS/MS; By MS/MS; By MS/MS	82; 72.7; 72.7; 72.7; 72.7; 82; 72.7; 72.7; 72.7	515300; 414920; 588900; 386690; 639780; 726460; 386220; 446280; 514950	336230; 305280; 358530; 198200; 203060; 271260; 232830; 212810; 260660	32; 37; 41; 40; 31; 21; 31; 28; 35	10; 12; 12; 10; 11; 11; 10; 9; 10	10; 12; 12; 10; 11; 11; 10; 9; 10	10; 12; 12; 10; 11; 11; 10; 9; 10	10	By MS/MS; By MS/MS; By MS/MS; By MS/MS; By MS/MS; By MS/MS; By MS/MS; By MS/MS; By MS/MS	72.7; 82; 82; 77.6; 82; 72.7; 65.8; 56.5; 72.7	518930; 448210; 520910; 349760; 417900; 446520; 392800; 527250; 371230	290830; 289190; 288520; 183550; 122770; 225800; 220800; 258480; 244230	27; 29; 33; 16; 11; 19; 14; 10; 17
all3660	0.441628	1	false	truth	1.12225	0.484504	0.281962	0.0256527	0.864624	1.43897	8; 7; 8; 9; 7; 6; 7; 5; 6	8; 7; 8; 9; 7; 6; 7; 5; 6	8; 7; 8; 9; 7; 6; 7; 5; 6	7	By MS/MS; By MS/MS; By MS/MS; By MS/MS; By MS/MS; By MS/MS; By MS/MS; By MS/MS; By MS/MS	44.4; 39.1; 42.2; 47.6; 39.6; 34.2; 39.1; 28.9; 34.2	249430; 233090; 219800; 182890; 146710; 132640; 162990; 196540; 155990	166550; 164160; 145750; 95659; 82776; 60467; 111580; 119600; 74946	15; 10; 16; 21; 8; 4; 15; 12; 21	5; 6; 6; 6; 6; 5; 7; 5; 4	5; 6; 6; 6; 6; 5; 7; 5; 4	5; 6; 6; 6; 6; 5; 7; 5; 4	6	By MS/MS; By MS/MS; By MS/MS; By MS/MS; By MS/MS; By MS/MS; By MS/MS; By MS/MS; By MS/MS	30.7; 36; 30.7; 33.8; 39.1; 28.9; 39.1; 28.9; 28.9	145830; 77560; 71127; 202980; 235400; 204550; 185240; 193110; 169390	115210; 128460; 75940; 72431; 99684; 100820; 98459; 123930; 106490	11; 11; 6; 6; 6; 10; 17; 5; 10
all3680	0.147091	1	false	truth	1.29749	0.58719	0.365654	0.029642	0.963818	1.71043	2; 3; 6; 5; 5; 4; 4; 6; 4	2; 3; 6; 5; 5; 4; 4; 6; 4	2; 3; 6; 5; 5; 4; 4; 6; 4	4	By MS/MS; By MS/MS; By MS/MS; By MS/MS; By MS/MS; By matching; By MS/MS; By MS/MS; By MS/MS	12.1; 17.9; 30.8; 20.2; 24.8; 13.8; 21.3; 36.6; 20.5	21877; 17203; 25335; 15168; 18818; 12752; 30220; 27561; 0	16713; 10925; 9956; 21028; 8873.6; 6363.1; 18153; 16111; 0	3; 2; 5; 6; 6; 0; 5; 4; 6	3; 3; 2; 3; 3; 5; 4; 4; 6	3; 3; 2; 3; 3; 5; 4; 4; 6	3; 3; 2; 3; 3; 5; 4; 4; 6	3	By MS/MS; By MS/MS; By MS/MS; By MS/MS; By MS/MS; By MS/MS; By MS/MS; By MS/MS; By MS/MS	14.4; 15.6; 11; 14.4; 16.7; 26.5; 16.4; 19; 27.7	13532; 10263; 6650.1; 11087; 26493; 40965; 3030.2; 10126; 20106	9424.4; 9789.5; 9011.8; 8994.1; 12720; 16697; 0; 10285; 7232.3	4; 4; 3; 6; 4; 5; 2; 0; 2
all3794	0.26596	1	false	truth	0.663849	0.510207	0.364708	0.207688	0.392712	1.28301	2; 3; 5; 4; 2; 2; 4; 1; 3	2; 3; 5; 4; 2; 2; 4; 1; 3	2; 3; 5; 4; 2; 2; 4; 1; 3	3	By MS/MS; By MS/MS; By MS/MS; By MS/MS; By MS/MS; By matching; By MS/MS; By MS/MS; By MS/MS	7.7; 11.1; 18.9; 15.5; 7; 7; 18.4; 7; 14	2617.7; 47577; 17555; 9386.3; 15958; 19023; 20441; 0; 7796.6	0; 25838; 26592; 8566.3; 13881; 13146; 10803; 0; 16267	1; 2; 4; 2; 1; 0; 3; 1; 2	1; 2; 6; 5; 4; 4; 5; 4; 3	1; 2; 6; 5; 4; 4; 5; 4; 3	1; 2; 6; 5; 4; 4; 5; 4; 3	4	By MS/MS; By MS/MS; By MS/MS; By MS/MS; By MS/MS; By MS/MS; By MS/MS; By matching; By MS/MS	3.6; 6.5; 27.6; 23.5; 20.3; 16.2; 22.5; 18.2; 11.9	32416; 28471; 13771; 62473; 13659; 26330; 9545.1; 37817; 26955	0; 0; 11063; 26628; 16694; 22625; 0; 27714; 51015	2; 3; 4; 5; 4; 3; 3; 0; 4
all3797	0.0232472	1	false	truth	0.717131	0.25113	0.146148	0.0291143	0.588762	0.888509	7; 6; 7; 7; 7; 10; 7; 6; 8	7; 6; 7; 7; 7; 10; 7; 6; 8	7; 6; 7; 7; 7; 10; 7; 6; 8	7	By MS/MS; By MS/MS; By MS/MS; By MS/MS; By MS/MS; By MS/MS; By MS/MS; By MS/MS; By MS/MS	36.8; 29.9; 39.8; 34.9; 34.1; 48.3; 40.6; 32.2; 42.5	121860; 112610; 137210; 201260; 267190; 327760; 182690; 148910; 236830	96463; 115600; 125670; 127580; 123380; 111620; 84077; 108350; 96749	8; 9; 15; 13; 9; 13; 15; 6; 20	7; 9; 9; 6; 7; 7; 6; 9; 9	7; 9; 9; 6; 7; 7; 6; 9; 9	7; 9; 9; 6; 7; 7; 6; 9; 9	7	By MS/MS; By MS/MS; By MS/MS; By MS/MS; By MS/MS; By MS/MS; By MS/MS; By MS/MS; By MS/MS	35.2; 45.2; 46.4; 34.9; 40.6; 41.8; 32.2; 45.2; 51.3	123780; 163330; 178530; 172230; 499340; 522390; 343100; 429370; 319420	94965; 151880; 109600; 138590; 197120; 212240; 160260; 170540; 202110	8; 11; 12; 20; 11; 19; 22; 9; 17
all3822	0.645451	1	false	truth	1.09482	0.64065	0.372834	0.0730079	0.78433	1.57777	7; 7; 9; 10; 7; 7; 11; 8; 10	7; 7; 9; 10; 7; 7; 11; 8; 10	7; 7; 9; 10; 7; 7; 11; 8; 10	8	By MS/MS; By MS/MS; By MS/MS; By MS/MS; By MS/MS; By MS/MS; By MS/MS; By MS/MS; By MS/MS	39.7; 36; 49.6; 46.3; 46.3; 48.3; 54.5; 33.1; 47.9	67608; 71169; 112720; 146990; 129990; 130240; 118900; 145100; 134130	45931; 31798; 47435; 62547; 58505; 47811; 93413; 101630; 67685	4; 3; 10; 6; 4; 3; 13; 8; 7	5; 6; 6; 10; 7; 10; 7; 6; 5	5; 6; 6; 10; 7; 10; 7; 6; 5	5; 6; 6; 10; 7; 10; 7; 6; 5	6	By MS/MS; By MS/MS; By MS/MS; By MS/MS; By MS/MS; By MS/MS; By MS/MS; By MS/MS; By MS/MS	25.2; 34.3; 32.6; 55.4; 36; 48.8; 33.1; 38.4; 32.6	54939; 62059; 59045; 196360; 163490; 166770; 119110; 108330; 156190	34572; 35008; 29037; 90838; 110020; 59864; 62528; 49464; 63129	4; 6; 2; 6; 2; 7; 8; 1; 6
all3826	0.0505143	1	false	truth	1.48781	0.743559	0.483264	0.0607181	1.07615	2.09181	2; 2; 2; 2; 2; 2; 2; 2; 2	2; 2; 2; 2; 2; 2; 2; 2; 2	2; 2; 2; 2; 2; 2; 2; 2; 2	2	By MS/MS; By MS/MS; By MS/MS; By MS/MS; By MS/MS; By MS/MS; By MS/MS; By MS/MS; By MS/MS	14.5; 14.5; 14.5; 14.5; 14.5; 14.5; 14.5; 14.5; 14.5	14546; 7719; 8352.6; 42668; 29325; 29486; 38804; 52966; 33763	15862; 0; 7436.4; 14927; 19100; 14239; 22866; 28168; 21308	3; 4; 2; 8; 3; 2; 3; 4; 4	2; 2; 1; 2; 2; 2; 2; 1; 2	2; 2; 1; 2; 2; 2; 2; 1; 2	2; 2; 1; 2; 2; 2; 2; 1; 2	2	By MS/MS; By MS/MS; By matching; By MS/MS; By MS/MS; By MS/MS; By MS/MS; By matching; By MS/MS	14.5; 14.5; 8.7; 14.5; 14.5; 14.5; 14.5; 5.8; 14.5	19088; 17257; 13362; 8627.5; 33754; 35875; 52217; 2997.7; 39112	12932; 11674; 0; 7394.8; 8239.9; 19206; 20368; 0; 9175.1	1; 1; 0; 4; 4; 2; 3; 0; 1
all3854	0.0222398	1	false	truth	1.2387	0.322078	0.187437	0.0151716	1.06795	1.44762	10; 9; 10; 9; 7; 9; 10; 8; 8	10; 9; 10; 9; 7; 9; 10; 8; 8	10; 9; 10; 9; 7; 9; 10; 8; 8	9	By MS/MS; By MS/MS; By MS/MS; By MS/MS; By MS/MS; By MS/MS; By MS/MS; By MS/MS; By MS/MS	50.5; 46.5; 56; 46.5; 34.1; 53.5; 56; 49.1; 43.2	644520; 609970; 570860; 880280; 488960; 949400; 883050; 646770; 803810	481250; 565250; 316650; 505030; 442560; 429430; 444050; 562890; 438870	22; 15; 19; 19; 12; 15; 26; 22; 28	7; 7; 6; 7; 7; 8; 7; 6; 7	7; 7; 6; 7; 7; 8; 7; 6; 7	7; 7; 6; 7; 7; 8; 7; 6; 7	7	By MS/MS; By MS/MS; By MS/MS; By MS/MS; By MS/MS; By MS/MS; By MS/MS; By MS/MS; By MS/MS	34.4; 38.8; 30; 34.8; 45.8; 43.2; 34.4; 35.2; 38.5	538400; 425120; 247410; 842120; 625090; 606310; 600870; 656190; 570180	436880; 378580; 388440; 376210; 425850; 351160; 326660; 391240; 370620	9; 12; 10; 15; 10; 18; 18; 10; 15
all3909	0.160587	1	false	truth	1.65531	1.07184	1.03047	0.338278	0.978108	4.02493	3; 3; 4; 5; 3; 4; 3; 4; 4	3; 3; 4; 5; 3; 4; 3; 4; 4	3; 3; 4; 5; 3; 4; 3; 4; 4	4	By MS/MS; By MS/MS; By MS/MS; By MS/MS; By MS/MS; By MS/MS; By MS/MS; By MS/MS; By MS/MS	9.4; 13.4; 19.4; 19.4; 9.4; 17.4; 13.4; 15.4; 18.9	27368; 28192; 33841; 45192; 22907; 28458; 1412.9; 126600; 12003	27400; 30263; 24181; 26749; 28290; 18591; 0; 50576; 22931	1; 2; 3; 3; 0; 1; 3; 3; 1	2; 3; 2; 1; 2; 3; 3; 2; 3	2; 3; 2; 1; 2; 3; 3; 2; 3	2; 3; 2; 1; 2; 3; 3; 2; 3	2	By MS/MS; By matching; By matching; By matching; By matching; By MS/MS; By MS/MS; By matching; By MS/MS	8.9; 13.4; 7.4; 2.9; 10.6; 13.4; 13.4; 11.1; 13.4	24357; 26734; 15809; 13800; 2597.2; 27194; 0; 1350.3; 13601	0; 27004; 0; 0; 0; 14398; 0; 0; 10389	1; 0; 0; 0; 0; 1; 2; 0; 1
all3940	0.485079	1	false	truth	0.798734	0.724694	0.421744	0.170678	0.471695	1.45454	5; 3; 7; 5; 5; 4; 4; 3; 6	5; 3; 7; 5; 5; 4; 4; 3; 6	5; 3; 7; 5; 5; 4; 4; 3; 6	5	By MS/MS; By MS/MS; By MS/MS; By MS/MS; By MS/MS; By MS/MS; By MS/MS; By MS/MS; By MS/MS	55.6; 28.5; 63.9; 58.3; 58.3; 40.3; 45.8; 36.8; 63.2	61754; 31693; 48022; 47135; 36803; 59960; 56571; 49971; 92277	33391; 12321; 13865; 13823; 13579; 25633; 16112; 27430; 52804	9; 5; 18; 1; 4; 6; 6; 6; 9	4; 5; 5; 5; 4; 4; 4; 5; 8	4; 5; 5; 5; 4; 4; 4; 5; 8	4; 5; 5; 5; 4; 4; 4; 5; 8	5	By matching; By MS/MS; By MS/MS; By MS/MS; By MS/MS; By MS/MS; By MS/MS; By MS/MS; By MS/MS	36.8; 50; 55.6; 62.5; 50; 45.8; 46.5; 53.5; 76.4	13807; 28684; 31804; 33232; 56208; 58361; 84837; 100390; 138650	8169.7; 38778; 18894; 17138; 39089; 2995.3; 25981; 56151; 56088	0; 11; 2; 10; 8; 2; 3; 5; 10
all3941	0.07833	1	false	truth	1.56461	1.10251	0.669041	0.119699	1.03322	2.52149	4; 4; 4; 6; 3; 4; 4; 5; 4	4; 4; 4; 6; 3; 4; 4; 5; 4	4; 4; 4; 6; 3; 4; 4; 5; 4	4	By MS/MS; By MS/MS; By MS/MS; By MS/MS; By MS/MS; By MS/MS; By MS/MS; By MS/MS; By MS/MS	16.3; 14.8; 14.8; 21.4; 16.9; 15.4; 14.8; 23.4; 18.4	59875; 344370; 28624; 62099; 53990; 2636200; 52432; 161200; 41400	99316; 131870; 55860; 59606; 82148; 173010; 81831; 118460; 64130	3; 2; 3; 4; 6; 1; 5; 9; 7	2; 1; 3; 6; 5; 6; 7; 2; 5	2; 1; 3; 6; 5; 6; 7; 2; 5	2; 1; 3; 6; 5; 6; 7; 2; 5	5	By matching; By matching; By MS/MS; By MS/MS; By MS/MS; By MS/MS; By MS/MS; By matching; By MS/MS	6.5; 3.3; 11.6; 31.5; 24.9; 28.8; 30; 9.8; 22.3	25880; 128.4; 21429; 54364; 77952; 79434; 203190; 4486.9; 103930	46146; 0; 54559; 42389; 63806; 78883; 124850; 5946.9; 99864	0; 0; 3; 10; 6; 10; 6; 0; 3
all3953	0.308986	1	false	truth	0.849345	0.225748	0.242733	0.0398518	0.634383	1.13481	1; 2; 1; 3; 5; 3; 3; 2; 6	1; 2; 1; 3; 5; 3; 3; 2; 6	1; 2; 1; 3; 5; 3; 3; 2; 6	3	By MS/MS; By MS/MS; By matching; By MS/MS; By MS/MS; By MS/MS; By MS/MS; By MS/MS; By MS/MS	3.9; 7.1; 5; 13.9; 14.8; 12.8; 16.6; 8; 29.4	0; 15609; 3343.9; 2996.2; 21503; 24195; 11086; 0; 38180	0; 13114; 0; 0; 16814; 11537; 0; 0; 13368	1; 3; 0; 2; 2; 0; 5; 2; 5	2; 4; 2; 2; 2; 2; 1; 1; 2	2; 4; 2; 2; 2; 2; 1; 1; 2	2; 4; 2; 2; 2; 2; 1; 1; 2	2	By matching; By MS/MS; By matching; By MS/MS; By MS/MS; By MS/MS; By matching; By matching; By MS/MS	7.1; 14.8; 7.1; 10.4; 10.7; 8.9; 3.3; 3.6; 5.9	19030; 27177; 16728; 2670.2; 6967.8; 5113; 8345.5; 0; 8033.3	14149; 18072; 13153; 0; 0; 0; 0; 0; 0	0; 2; 0; 1; 1; 1; 0; 0; 1
all3964	0.13958	1	false	truth	1.22594	0.461725	0.268706	0.0180155	0.976339	1.52052	7; 10; 9; 11; 10; 10; 7; 9; 9	7; 10; 9; 11; 10; 10; 7; 9; 9	7; 10; 9; 11; 10; 10; 7; 9; 9	9	By MS/MS; By MS/MS; By MS/MS; By MS/MS; By MS/MS; By MS/MS; By MS/MS; By MS/MS; By MS/MS	19.6; 28; 27.4; 34.1; 31.8; 29.9; 24.4; 32.2; 26.7	172990; 156320; 212350; 209140; 243680; 108420; 129850; 145590; 74895	111560; 99992; 129610; 146810; 126760; 53057; 123510; 69778; 93048	9; 7; 10; 14; 11; 7; 15; 15; 13	9; 4; 8; 11; 9; 11; 7; 5; 11	9; 4; 8; 11; 9; 11; 7; 5; 11	9; 4; 8; 11; 9; 11; 7; 5; 11	9	By MS/MS; By MS/MS; By MS/MS; By MS/MS; By MS/MS; By MS/MS; By MS/MS; By MS/MS; By MS/MS	25.1; 10.1; 22.5; 34.1; 27.6; 32.4; 22.3; 14.7; 32.8	124380; 109510; 124400; 237570; 223920; 191800; 52486; 129740; 94831	96848; 89991; 82106; 116520; 106670; 88731; 55011; 92943; 74105	5; 4; 4; 13; 4; 12; 10; 4; 10
all3976	0.557133	1	false	truth	1.15877	0.626047	0.970707	0.488663	0.514287	4.01804	3; 1; 1; 1; 1; 4; 2; 1; 2	3; 1; 1; 1; 1; 4; 2; 1; 2	3; 1; 1; 1; 1; 4; 2; 1; 2	1	By MS/MS; By MS/MS; By MS/MS; By MS/MS; By MS/MS; By MS/MS; By MS/MS; By MS/MS; By MS/MS	12.9; 6.6; 3.1; 3.1; 3.1; 14.6; 8.2; 3.1; 9.6	8960.2; 15481; 0; 9244.4; 9863.8; 23623; 11252; 10328; 18415	0; 0; 0; 0; 0; 19526; 32759; 0; 14559	1; 1; 1; 1; 1; 1; 1; 1; 3	1; 1; 1; 3; 3; 3; 2; 1; 2	1; 1; 1; 3; 3; 3; 2; 1; 2	1; 1; 1; 3; 3; 3; 2; 1; 2	2	By matching; By matching; By matching; By MS/MS; By MS/MS; By MS/MS; By MS/MS; By matching; By MS/MS	3.1; 3.1; 4.9; 12.7; 13.1; 11; 6.1; 4.9; 6.1	5419.7; 5501.6; 1871.4; 4715.1; 6654.2; 19345; 18874; 4329.6; 6145.8	0; 0; 0; 0; 11988; 0; 28590; 0; 0	0; 0; 0; 2; 1; 2; 2; 0; 2
all3984	0.00412452	1	false	truth	0.485228	0.27777	0.161651	0.050877	0.343285	0.679192	3; 2; 3; 2; 3; 2; 2; 4; 3	3; 2; 3; 2; 3; 2; 2; 4; 3	3; 2; 3; 2; 3; 2; 2; 4; 3	3	By MS/MS; By MS/MS; By MS/MS; By MS/MS; By MS/MS; By MS/MS; By MS/MS; By MS/MS; By MS/MS	22.5; 18.6; 25.1; 18.6; 19.5; 18.6; 18.6; 32; 28.1	16118; 7331.5; 22727; 2222.1; 6460.9; 8933.7; 4498.1; 23379; 7131.1	13224; 7682.8; 16467; 4165.2; 10854; 11635; 6443.5; 15140; 11767	8; 4; 7; 1; 1; 1; 8; 10; 10	3; 6; 3; 5; 3; 4; 5; 3; 3	3; 6; 3; 5; 3; 4; 5; 3; 3	3; 6; 3; 5; 3; 4; 5; 3; 3	3	By MS/MS; By MS/MS; By MS/MS; By MS/MS; By MS/MS; By MS/MS; By MS/MS; By MS/MS; By MS/MS	19.5; 38.1; 25.1; 43.7; 30.3; 32; 32; 22.5; 22.5	9708.6; 17882; 11881; 80879; 35220; 53661; 69869; 35990; 30818	17299; 9008.8; 10791; 43778; 34619; 29756; 29563; 27319; 18299	4; 6; 3; 24; 18; 23; 18; 2; 15
all4008	0.351483	1	false	truth	1.18504	0.529585	0.347724	0.0236395	0.860652	1.5668	4; 5; 4; 3; 3; 8; 6; 2; 3	4; 5; 4; 3; 3; 8; 6; 2; 3	4; 5; 4; 3; 3; 8; 6; 2; 3	4	By MS/MS; By MS/MS; By MS/MS; By MS/MS; By MS/MS; By MS/MS; By MS/MS; By MS/MS; By MS/MS	8.8; 11.2; 7.1; 8; 7.1; 20.4; 17.1; 7; 7.1	21778; 17152; 12540; 16298; 11682; 37098; 28375; 1636.8; 3254	20681; 6846.6; 21548; 14987; 13608; 10957; 16818; 0; 0	1; 1; 4; 1; 1; 1; 3; 2; 1	4; 6; 1; 4; 3; 4; 4; 4; 5	4; 6; 1; 4; 3; 4; 4; 4; 5	4; 6; 1; 4; 3; 4; 4; 4; 5	4	By MS/MS; By MS/MS; By matching; By MS/MS; By MS/MS; By MS/MS; By MS/MS; By matching; By MS/MS	9.8; 13.6; 1.7; 12.2; 7.1; 8.3; 8.1; 10; 13.4	7374.2; 25807; 11165; 34437; 21225; 22493; 19739; 18066; 7663.7	11759; 11428; 0; 17777; 14810; 18713; 18346; 8456.5; 8381.3	2; 1; 0; 3; 1; 3; 3; 0; 1
all4018	0.166722	1	false	truth	1.29416	0.482101	0.400922	0.0487224	0.944069	1.77681	4; 5; 3; 5; 2; 6; 5; 3; 5	4; 5; 3; 5; 2; 6; 5; 3; 5	4; 5; 3; 5; 2; 6; 5; 3; 5	5	By MS/MS; By MS/MS; By MS/MS; By MS/MS; By MS/MS; By MS/MS; By MS/MS; By MS/MS; By MS/MS	14.8; 16.3; 10.2; 19.2; 8.5; 21.6; 18.3; 10; 17.2	8005.6; 1527; 0; 27954; 24527; 41394; 4721.7; 0; 27124	11093; 0; 0; 14825; 16370; 9891.8; 0; 0; 9970.9	3; 2; 2; 5; 4; 1; 5; 2; 6	4; 2; 0; 2; 4; 3; 5; 3; 2	4; 2; 0; 2; 4; 3; 5; 3; 2	4; 2; 0; 2; 4; 3; 5; 3; 2	3	By MS/MS; By MS/MS; By matching; By MS/MS; By MS/MS; By MS/MS; By MS/MS; By MS/MS; By MS/MS	11.1; 6.5; 0; 8.5; 17; 12.4; 17.6; 11.8; 8.5	4049.2; 0; 0; 32667; 16182; 8770; 26423; 17957; 5533	7263.9; 0; 0; 19206; 0; 8102.3; 10282; 12600; 0	2; 1; 0; 6; 3; 3; 5; 1; 2
all4019	0.0950767	1	false	false	1.42916	0.368638	0.453727	0.0454939	1.0279	1.96666	3; 2; 5; 1; 1; 3; 0; 1; 1	3; 2; 5; 1; 1; 3; 0; 1; 1	3; 2; 5; 1; 1; 3; 0; 1; 1	1	By MS/MS; By MS/MS; By MS/MS; By matching; By MS/MS; By matching; By matching; By matching; By MS/MS	10.6; 7.5; 15.7; 2.4; 3.1; 10.4; 0; 2.4; 2	221620; 255360; 216630; 3545.3; 7555.6; 37484; 0; 3631.1; 0	74709; 83597; 47479; 0; 0; 0; 0; 0; 0	5; 3; 4; 0; 1; 0; 0; 0; 1	4; 1; 2; 1; 1; 2; 1; 2; 1	4; 1; 2; 1; 1; 2; 1; 2; 1	4; 1; 2; 1; 1; 2; 1; 2; 1	1	By matching; By MS/MS; By matching; By matching; By matching; By MS/MS; By matching; By matching; By MS/MS	9.6; 3.1; 5.1; 2.4; 2.4; 4.3; 1.8; 5.1; 3.1	24504; 0; 12288; 24690; 31769; 36903; 9016.5; 21497; 2389.9	43996; 0; 51620; 0; 0; 0; 0; 40035; 0	0; 1; 0; 0; 0; 1; 0; 0; 1
all4021	0.00477391	1	false	truth	0	#N/A	#N/A	#N/A	#N/A	#N/A	1; 1; 2; 1; 0; 1; 1; 2; 3	1; 1; 2; 1; 0; 1; 1; 2; 3	1; 1; 2; 1; 0; 1; 1; 2; 3	1	By MS/MS; By MS/MS; By MS/MS; By MS/MS; By matching; By MS/MS; By MS/MS; By MS/MS; By MS/MS	5.2; 4; 9.2; 4; 0; 5.2; 4.3; 9.5; 13.5	8711.8; 8583.7; 6320.4; 16506; 0; 5552.4; 3532.6; 5311.3; 3445.6	0; 0; 0; 0; 0; 0; 0; 0; 0	1; 1; 1; 1; 0; 0; 2; 3; 3	1; 3; 3; 3; 4; 3; 2; 1; 3	1; 3; 3; 3; 4; 3; 2; 1; 3	1; 3; 3; 3; 4; 3; 2; 1; 3	3	By MS/MS; By MS/MS; By matching; By MS/MS; By MS/MS; By MS/MS; By MS/MS; By matching; By MS/MS	4; 13.5; 13.5; 13.5; 21.2; 13.5; 9.2; 5.2; 13.5	9909.2; 10575; 11556; 31318; 31961; 19021; 5392.4; 7466.7; 22761	0; 8375.8; 4729.9; 5644.3; 9521.8; 15562; 0; 0; 15367	1; 2; 0; 2; 3; 9; 2; 0; 2
all4042	0.98916	1	false	truth	1.00163	0.24218	0.223749	0.0355205	0.807719	1.26932	4; 6; 1; 3; 1; 1; 2; 2; 3	4; 6; 1; 3; 1; 1; 2; 2; 3	4; 6; 1; 3; 1; 1; 2; 2; 3	2	By MS/MS; By MS/MS; By matching; By MS/MS; By MS/MS; By MS/MS; By MS/MS; By MS/MS; By MS/MS	9.1; 14.5; 2.4; 8; 2.5; 2.7; 5.3; 5.3; 7.3	19388; 57543; 6537.9; 6523.1; 7217; 5586; 12415; 5802.9; 17967	0; 15679; 0; 0; 0; 0; 13221; 0; 12823	2; 0; 0; 4; 1; 1; 2; 2; 2	4; 1; 2; 3; 2; 3; 3; 1; 4	4; 1; 2; 3; 2; 3; 3; 1; 4	4; 1; 2; 3; 2; 3; 3; 1; 4	3	By MS/MS; By MS/MS; By MS/MS; By MS/MS; By MS/MS; By MS/MS; By MS/MS; By matching; By MS/MS	10.5; 2.7; 5.1; 7.8; 5.3; 7.4; 7.3; 2.2; 9.6	15365; 0; 3380.3; 55505; 17852; 17015; 12253; 10166; 30363	9872.5; 0; 0; 22032; 14315; 9985.5; 0; 0; 11933	1; 1; 1; 3; 1; 2; 2; 0; 1
all4071	0.289765	1	false	truth	1.19454	0.494556	0.352542	0.0761595	0.913243	1.67279	2; 4; 3; 6; 3; 2; 6; 3; 5	2; 4; 3; 6; 3; 2; 6; 3; 5	2; 4; 3; 6; 3; 2; 6; 3; 5	3	By MS/MS; By MS/MS; By MS/MS; By MS/MS; By matching; By MS/MS; By MS/MS; By MS/MS; By MS/MS	6.2; 12.3; 7.8; 16.8; 7.1; 5; 15.2; 6.4; 11.4	21918; 21414; 22532; 37958; 14714; 5884.2; 44725; 22750; 19608	16432; 17838; 16334; 11085; 16686; 0; 16787; 11610; 17053	3; 2; 3; 5; 0; 1; 4; 2; 3	2; 2; 2; 6; 1; 4; 3; 3; 4	2; 2; 2; 6; 1; 4; 3; 3; 4	2; 2; 2; 6; 1; 4; 3; 3; 4	3	By MS/MS; By MS/MS; By MS/MS; By MS/MS; By MS/MS; By MS/MS; By MS/MS; By MS/MS; By MS/MS	6.2; 6.4; 6.4; 19.3; 2.9; 13.9; 8.2; 8.2; 11.1	11628; 2742.8; 9949.5; 24298; 11953; 29584; 15410; 21168; 23988	0; 0; 16715; 14938; 0; 16862; 6119.1; 11967; 16484	2; 1; 1; 2; 1; 3; 4; 0; 3
all4121	0.0186739	1	false	truth	1.38996	0.566454	0.329654	0.0508619	1.11797	1.81092	9; 9; 9; 12; 10; 8; 13; 10; 10	9; 9; 9; 12; 10; 8; 13; 10; 10	9; 9; 9; 12; 10; 8; 13; 10; 10	10	By MS/MS; By MS/MS; By MS/MS; By MS/MS; By MS/MS; By MS/MS; By MS/MS; By MS/MS; By MS/MS	32; 32; 30.9; 41.6; 35.7; 29.3; 49.1; 38.2; 38.2	112110; 194150; 148230; 165770; 202870; 238360; 150610; 188140; 178930	113720; 123900; 120480; 99003; 124380; 100920; 116530; 89011; 109330	7; 11; 13; 12; 12; 4; 13; 11; 14	8; 7; 9; 8; 7; 11; 11; 9; 9	8; 7; 9; 8; 7; 11; 11; 9; 9	8; 7; 9; 8; 7; 11; 11; 9; 9	9	By MS/MS; By MS/MS; By MS/MS; By MS/MS; By MS/MS; By MS/MS; By MS/MS; By MS/MS; By MS/MS	27.3; 24.8; 32.3; 26.8; 24.3; 39.3; 39.8; 30.2; 31.1	99451; 44329; 92055; 86992; 53610; 175330; 259850; 241880; 173660	76379; 57052; 87054; 65341; 26807; 81224; 136240; 128780; 92238	7; 5; 7; 6; 3; 11; 18; 5; 9
all4130	0.421506	1	false	truth	0.86613	0.249676	#N/A	0.115054	#N/A	#N/A	1; 3; 3; 3; 0; 1; 0; 1; 1	1; 3; 3; 3; 0; 1; 0; 1; 1	1; 3; 3; 3; 0; 1; 0; 1; 1	1	By MS/MS; By MS/MS; By MS/MS; By MS/MS; By matching; By matching; By matching; By MS/MS; By MS/MS	3.7; 14; 14; 14.3; 0; 4.7; 0; 4.7; 3.7	10804; 25586; 11371; 2958.3; 0; 5877.3; 0; 0; 0	0; 14489; 0; 0; 0; 0; 0; 0; 0	1; 2; 3; 1; 0; 0; 0; 1; 1	2; 3; 3; 1; 1; 2; 2; 1; 2	2; 3; 3; 1; 1; 2; 2; 1; 2	2; 3; 3; 1; 1; 2; 2; 1; 2	2	By MS/MS; By MS/MS; By MS/MS; By matching; By matching; By MS/MS; By MS/MS; By matching; By MS/MS	7.3; 14; 14; 5.6; 4.7; 8.3; 9.3; 5; 9.3	13317; 20066; 27838; 2201.1; 11073; 21898; 3714.7; 1415.7; 20023	10602; 15025; 20214; 0; 0; 13074; 0; 0; 0	1; 2; 3; 0; 0; 2; 1; 0; 1
all4131	0.00147354	1	false	truth	1.51478	0.520763	0.303064	0.0284533	1.24849	1.86979	16; 13; 15; 19; 12; 15; 18; 15; 18	16; 13; 15; 19; 12; 15; 18; 15; 18	16; 13; 15; 19; 12; 15; 18; 15; 18	15	By MS/MS; By MS/MS; By MS/MS; By MS/MS; By MS/MS; By MS/MS; By MS/MS; By MS/MS; By MS/MS	52.2; 45.2; 50.8; 63.2; 49.2; 57.2; 63; 57.2; 63	427010; 421290; 598630; 957030; 533250; 774060; 685670; 800180; 748690	345640; 314600; 350270; 447810; 444940; 408210; 383930; 481790; 489160	23; 17; 31; 32; 20; 14; 31; 25; 35	13; 13; 13; 12; 13; 14; 13; 9; 12	13; 13; 13; 12; 13; 14; 13; 9; 12	13; 13; 13; 12; 13; 14; 13; 9; 12	13	By MS/MS; By MS/MS; By MS/MS; By MS/MS; By MS/MS; By MS/MS; By MS/MS; By MS/MS; By MS/MS	50.5; 45.5; 49.8; 45.2; 44; 51.2; 48; 34.8; 44	239760; 225620; 133830; 788590; 698900; 534190; 413040; 284530; 443370	175190; 200520; 160140; 440760; 386420; 363750; 287360; 261800; 301640	10; 16; 9; 11; 6; 18; 15; 3; 13
all4140	0.15395	1	false	truth	0.58052	0.473487	0.419132	0.0501073	0.180009	1.04228	3; 1; 3; 1; 4; 5; 1; 3; 3	3; 1; 3; 1; 4; 5; 1; 3; 3	3; 1; 3; 1; 4; 5; 1; 3; 3	3	By MS/MS; By matching; By MS/MS; By MS/MS; By matching; By MS/MS; By matching; By MS/MS; By MS/MS	6.7; 1.7; 5.7; 1.7; 10.6; 13.3; 3.4; 10.4; 7.2	30213; 22968; 7636.7; 16451; 9236.9; 47202; 24418; 6237.1; 9629.4	29404; 0; 0; 0; 6612.8; 10470; 0; 0; 7901.7	1; 0; 2; 1; 0; 1; 0; 1; 1	0; 2; 3; 7; 8; 6; 6; 6; 6	0; 2; 3; 7; 8; 6; 6; 6; 6	0; 2; 3; 7; 8; 6; 6; 6; 6	6	By matching; By MS/MS; By matching; By MS/MS; By MS/MS; By MS/MS; By MS/MS; By MS/MS; By MS/MS	0; 4.4; 5.2; 17.6; 24; 15.9; 15.3; 12.9; 16.9	0; 0; 11491; 90242; 61510; 53711; 54598; 49927; 31080	0; 0; 11504; 34715; 22067; 37890; 30409; 17009; 28477	0; 2; 0; 6; 4; 5; 3; 2; 6
all4145	0.00154242	1	false	truth	0.69899	0.190224	0.110703	0.0119417	0.595749	0.819128	4; 4; 6; 3; 4; 5; 5; 4; 4	4; 4; 6; 3; 4; 5; 5; 4; 4	4; 4; 6; 3; 4; 5; 5; 4; 4	4	By MS/MS; By MS/MS; By MS/MS; By MS/MS; By MS/MS; By MS/MS; By MS/MS; By MS/MS; By MS/MS	37.4; 37.4; 54; 30.7; 37.4; 42.9; 46.6; 37.4; 37.4	108810; 44375; 176500; 83927; 125310; 184910; 123820; 186840; 145130	95854; 101660; 77573; 54796; 63154; 74710; 87093; 100740; 67499	11; 7; 13; 9; 8; 3; 6; 9; 11	5; 5; 6; 4; 4; 3; 5; 4; 5	5; 5; 6; 4; 4; 3; 5; 4; 5	5; 5; 6; 4; 4; 3; 5; 4; 5	5	By MS/MS; By MS/MS; By MS/MS; By MS/MS; By MS/MS; By MS/MS; By MS/MS; By MS/MS; By MS/MS	44.8; 46.6; 54; 37.4; 39.9; 26.4; 46.6; 37.4; 46.6	186420; 151820; 134420; 277950; 207660; 267770; 246230; 229880; 260610	123630; 116860; 93426; 143750; 117290; 139010; 137010; 76097; 125760	8; 12; 9; 6; 7; 7; 8; 2; 5
all4148	0.925047	1	false	truth	0.985947	0.435851	0.253648	0.0452829	0.768939	1.29648	3; 3; 3; 2; 3; 3; 3; 3; 3	3; 3; 3; 2; 3; 3; 3; 3; 3	3; 3; 3; 2; 3; 3; 3; 3; 3	3	By MS/MS; By MS/MS; By MS/MS; By MS/MS; By MS/MS; By MS/MS; By MS/MS; By MS/MS; By MS/MS	38.4; 38.4; 38.4; 38.4; 38.4; 38.4; 38.4; 38.4; 38.4	374390; 297420; 253470; 380920; 427040; 259970; 483070; 338680; 493910	250480; 248310; 163220; 334260; 197490; 121710; 319920; 243120; 261330	12; 7; 12; 9; 18; 5; 7; 9; 12	3; 3; 3; 3; 3; 3; 3; 2; 3	3; 3; 3; 3; 3; 3; 3; 2; 3	3; 3; 3; 3; 3; 3; 3; 2; 3	3	By MS/MS; By MS/MS; By MS/MS; By MS/MS; By MS/MS; By MS/MS; By MS/MS; By MS/MS; By MS/MS	38.4; 38.4; 38.4; 38.4; 38.4; 38.4; 38.4; 38.4; 38.4	228860; 243590; 175490; 423800; 440210; 390450; 164430; 467100; 409480	190760; 166350; 133600; 206550; 249470; 269540; 267730; 421070; 316270	10; 10; 7; 14; 11; 6; 8; 3; 5
all4187	0.465029	1	false	truth	1.16126	0.637146	0.417503	0.0899605	0.823594	1.72851	3; 2; 3; 2; 4; 3; 3; 2; 2	3; 2; 3; 2; 4; 3; 3; 2; 2	3; 2; 3; 2; 4; 3; 3; 2; 2	3	By MS/MS; By MS/MS; By MS/MS; By MS/MS; By MS/MS; By MS/MS; By MS/MS; By MS/MS; By MS/MS	31.9; 21.7; 31.9; 21.7; 42; 31.9; 31.9; 21.7; 21.7	32297; 56607; 53857; 66195; 52520; 71937; 68067; 25617; 54872	0; 25762; 25968; 13665; 30641; 35193; 41236; 22838; 44365	3; 2; 4; 2; 7; 4; 8; 8; 4	2; 2; 2; 2; 2; 2; 2; 2; 1	2; 2; 2; 2; 2; 2; 2; 2; 1	2; 2; 2; 2; 2; 2; 2; 2; 1	2	By MS/MS; By MS/MS; By MS/MS; By MS/MS; By MS/MS; By MS/MS; By MS/MS; By MS/MS; By MS/MS	21.7; 21.7; 21.7; 21.7; 21.7; 21.7; 21.7; 21.7; 12.3	61937; 61699; 66695; 34457; 42113; 39381; 28883; 10643; 12124	21726; 24368; 48363; 26678; 21585; 26516; 17117; 0; 0	1; 3; 3; 7; 6; 5; 7; 2; 3
all4191	0.0485898	1	false	truth	0.668131	0.372566	0.216819	0.0464627	0.476274	0.9251	10; 8; 9; 10; 7; 9; 8; 6; 7	10; 8; 9; 10; 7; 9; 8; 6; 7	10; 8; 9; 10; 7; 9; 8; 6; 7	8	By MS/MS; By MS/MS; By MS/MS; By MS/MS; By MS/MS; By MS/MS; By MS/MS; By MS/MS; By MS/MS	49.8; 37.1; 46.7; 46.7; 39.4; 47; 46; 35.9; 37.5	126500; 104690; 136790; 169200; 210590; 169160; 99325; 95679; 30871	81939; 75490; 67040; 99153; 64110; 125050; 74589; 68111; 16754	13; 6; 12; 16; 16; 8; 10; 8; 10	8; 8; 8; 7; 10; 10; 7; 9; 8	8; 8; 8; 7; 10; 10; 7; 9; 8	8; 8; 8; 7; 10; 10; 7; 9; 8	8	By MS/MS; By MS/MS; By MS/MS; By MS/MS; By MS/MS; By MS/MS; By MS/MS; By MS/MS; By MS/MS	36.2; 33; 34.9; 39; 47.3; 46.7; 38.1; 53.7; 30.2	79663; 144520; 142140; 239690; 248940; 140000; 211790; 244740; 347450	61643; 91866; 77186; 149550; 118230; 108200; 115970; 140900; 195450	6; 4; 6; 12; 11; 15; 10; 7; 13
all4193	0.77657	1	false	truth	1.07056	0.59022	0.464904	0.121322	0.700856	1.7359	1; 2; 1; 2; 2; 4; 1; 3; 2	1; 2; 1; 2; 2; 4; 1; 3; 2	1; 2; 1; 2; 2; 4; 1; 3; 2	2	By MS/MS; By MS/MS; By MS/MS; By MS/MS; By MS/MS; By MS/MS; By MS/MS; By MS/MS; By MS/MS	11.1; 23; 11.1; 17.5; 23; 32.5; 11.1; 34.9; 23	4819.4; 25406; 3366.5; 7813; 10209; 79365; 5998.8; 0; 11014	0; 16598; 0; 0; 21909; 22276; 0; 0; 0	1; 3; 1; 1; 4; 3; 6; 4; 5	3; 1; 3; 2; 2; 3; 2; 2; 3	3; 1; 3; 2; 2; 3; 2; 2; 3	3; 1; 3; 2; 2; 3; 2; 2; 3	2	By MS/MS; By MS/MS; By MS/MS; By MS/MS; By MS/MS; By MS/MS; By MS/MS; By MS/MS; By MS/MS	34.9; 11.9; 31.7; 23; 23; 34.9; 23; 23; 23.8	30750; 22131; 36820; 12279; 36005; 21602; 24306; 30525; 56370	14742; 0; 17530; 6488.3; 20072; 26080; 0; 16421; 33866	3; 2; 2; 7; 2; 6; 5; 2; 5
all4196	0.804349	1	false	truth	0.941079	0.502889	0.400943	0.129533	0.629137	1.5331	2; 3; 2; 4; 1; 2; 3; 3; 4	2; 3; 2; 4; 1; 2; 3; 3; 4	2; 3; 2; 4; 1; 2; 3; 3; 4	3	By MS/MS; By MS/MS; By MS/MS; By MS/MS; By MS/MS; By MS/MS; By MS/MS; By MS/MS; By MS/MS	13; 22.8; 13; 20.7; 7.1; 13; 25; 20.1; 33.2	7470.4; 30883; 5227.4; 38682; 9905.8; 24974; 2478.5; 19294; 25714	10340; 13028; 0; 18697; 0; 18394; 0; 11916; 21905	1; 1; 1; 4; 1; 1; 3; 5; 8	3; 2; 1; 5; 3; 2; 1; 2; 3	3; 2; 1; 5; 3; 2; 1; 2; 3	3; 2; 1; 5; 3; 2; 1; 2; 3	2	By MS/MS; By MS/MS; By matching; By MS/MS; By MS/MS; By MS/MS; By MS/MS; By matching; By MS/MS	23.4; 16.8; 5.4; 42.4; 20.1; 13; 7.6; 16.8; 26.1	8269; 15429; 3563.9; 58444; 49647; 24404; 9463.8; 10963; 22735	0; 13934; 0; 19953; 25880; 21120; 0; 8560.5; 0	1; 1; 0; 6; 3; 2; 2; 0; 5
all4198	0.436293	1	false	truth	0.807711	0.584823	0.383875	0.0918932	0.478407	1.30048	4; 3; 2; 4; 3; 3; 5; 4; 4	4; 3; 2; 4; 3; 3; 5; 4; 4	4; 3; 2; 4; 3; 3; 5; 4; 4	4	By MS/MS; By matching; By MS/MS; By MS/MS; By MS/MS; By MS/MS; By MS/MS; By MS/MS; By MS/MS	36.5; 30.4; 16.9; 36.5; 27; 26.4; 45.9; 36.5; 36.5	8180.8; 13580; 28056; 66418; 48761; 28258; 98848; 18334; 90507	8235.4; 9987.4; 22305; 35240; 18993; 25312; 52145; 12251; 56615	1; 0; 5; 5; 3; 3; 7; 2; 6	2; 2; 2; 4; 4; 4; 4; 1; 3	2; 2; 2; 4; 4; 4; 4; 1; 3	2; 2; 2; 4; 4; 4; 4; 1; 3	3	By MS/MS; By MS/MS; By MS/MS; By MS/MS; By MS/MS; By MS/MS; By MS/MS; By MS/MS; By MS/MS	20.9; 19.6; 20.9; 36.5; 35.1; 37.2; 36.5; 10.8; 30.4	3369.3; 0; 9208.3; 134280; 42461; 20060; 69375; 53133; 72273	0; 0; 12019; 58841; 41571; 0; 41159; 0; 29290	1; 1; 0; 2; 1; 3; 6; 2; 4
all4199	0.259636	1	false	truth	1.72509	2.16548	1.3411	0.328867	0.728022	4.41282	3; 3; 4; 6; 4; 3; 4; 3; 2	3; 3; 4; 6; 4; 3; 4; 3; 2	3; 3; 4; 6; 4; 3; 4; 3; 2	3	By MS/MS; By MS/MS; By MS/MS; By MS/MS; By MS/MS; By MS/MS; By MS/MS; By MS/MS; By MS/MS	21.8; 16.1; 21.8; 32.2; 21.8; 16.1; 27; 16.1; 16.7	13146; 22623; 48744; 63318; 47021; 24078; 1893.1; 10618; 4635.6	24072; 8328; 43772; 44988; 17012; 6247; 0; 7567.5; 0	2; 1; 3; 6; 1; 1; 2; 2; 1	4; 3; 4; 4; 4; 5; 6; 3; 5	4; 3; 4; 4; 4; 5; 6; 3; 5	4; 3; 4; 4; 4; 5; 6; 3; 5	4	By MS/MS; By MS/MS; By MS/MS; By MS/MS; By MS/MS; By MS/MS; By MS/MS; By matching; By MS/MS	24.7; 16.1; 21.3; 24.7; 24.7; 27; 32.2; 16.1; 27	19582; 14511; 57806; 31008; 8266.1; 29443; 19718; 10274; 17753	4314.4; 13823; 43836; 9771.1; 3928.9; 14890; 11358; 12571; 6173.9	1; 2; 3; 1; 1; 2; 3; 0; 1
all4201	0.469125	1	false	truth	1.48976	1.54572	1.50181	0.611072	0.472185	7.18868	3; 3; 1; 3; 3; 2; 3; 3; 3	3; 3; 1; 3; 3; 2; 3; 3; 3	3; 3; 1; 3; 3; 2; 3; 3; 3	3	By MS/MS; By MS/MS; By MS/MS; By MS/MS; By MS/MS; By MS/MS; By MS/MS; By MS/MS; By MS/MS	20.3; 24.2; 4.9; 18.7; 24.2; 19.2; 24.2; 24.2; 24.2	20056; 9952; 12786; 40569; 22034; 0; 16132; 28081; 0	27718; 0; 0; 15096; 0; 0; 2704.3; 17326; 0	3; 2; 1; 2; 1; 1; 3; 4; 3	2; 3; 3; 2; 2; 4; 4; 2; 3	2; 3; 3; 2; 2; 4; 4; 2; 3	2; 3; 3; 2; 2; 4; 4; 2; 3	3	By matching; By MS/MS; By MS/MS; By MS/MS; By MS/MS; By MS/MS; By MS/MS; By MS/MS; By MS/MS	15.4; 18.7; 18.7; 19.2; 15.4; 29.1; 29.1; 19.2; 24.2	3690.5; 12201; 1013.9; 0; 565.12; 40887; 9568.9; 17524; 6885.4	3433.5; 21098; 0; 0; 0; 11967; 6158.1; 0; 0	0; 2; 1; 2; 2; 2; 2; 1; 2
all4202	0.124915	1	false	truth	0.575996	0.402324	0.368453	0.114452	0.251886	1.04899	1; 3; 3; 1; 3; 2; 1; 1; 1	1; 3; 3; 1; 3; 2; 1; 1; 1	1; 3; 3; 1; 3; 2; 1; 1; 1	1	By MS/MS; By MS/MS; By MS/MS; By MS/MS; By MS/MS; By MS/MS; By MS/MS; By MS/MS; By MS/MS	15; 29.3; 29.3; 15; 29.3; 24.1; 15; 15; 15	35815; 55842; 43038; 8567.5; 31927; 0; 43104; 44840; 50677	0; 17976; 25936; 0; 8940.3; 0; 0; 38731; 0	3; 3; 4; 2; 2; 2; 1; 2; 1	1; 2; 2; 2; 1; 2; 1; 2; 3	1; 2; 2; 2; 1; 2; 1; 2; 3	1; 2; 2; 2; 1; 2; 1; 2; 3	2	By MS/MS; By MS/MS; By MS/MS; By MS/MS; By MS/MS; By MS/MS; By MS/MS; By MS/MS; By MS/MS	15; 24.1; 24.1; 20.3; 15; 24.1; 15; 20.3; 29.3	16653; 39884; 13461; 96517; 85639; 8645; 0; 29762; 81326	0; 40296; 0; 44440; 46712; 0; 0; 20963; 57454	1; 2; 3; 3; 1; 2; 1; 1; 2
all4203	0.275782	1	false	truth	0.790081	0.510792	0.297261	0.0451628	0.520955	1.13395	6; 5; 6; 4; 5; 5; 5; 5; 3	6; 5; 6; 4; 5; 5; 5; 5; 3	6; 5; 6; 4; 5; 5; 5; 5; 3	5	By MS/MS; By MS/MS; By MS/MS; By MS/MS; By MS/MS; By MS/MS; By MS/MS; By MS/MS; By MS/MS	43.4; 39.6; 43.4; 35.2; 36.8; 36.8; 39.6; 40.7; 19.8	60779; 41247; 28757; 87503; 115820; 184610; 84245; 42283; 19058	41424; 25562; 16288; 59223; 62155; 71011; 44759; 14217; 33757	11; 6; 9; 7; 6; 3; 15; 5; 9	4; 5; 4; 4; 4; 6; 5; 4; 4	4; 5; 4; 4; 4; 6; 5; 4; 4	4; 5; 4; 4; 4; 6; 5; 4; 4	4	By MS/MS; By MS/MS; By MS/MS; By MS/MS; By MS/MS; By MS/MS; By MS/MS; By MS/MS; By MS/MS	30.8; 39.6; 33; 35.2; 35.2; 43.4; 39.6; 31.3; 31.3	15191; 32296; 60920; 142360; 142910; 131230; 117490; 108350; 51932	28027; 23206; 43835; 106610; 79855; 60645; 70140; 50717; 44211	3; 8; 4; 9; 3; 8; 14; 2; 2
all4205	0.525694	1	false	truth	0.861298	0.590883	0.358145	0.0480539	0.535137	1.27442	4; 4; 4; 4; 4; 4; 3; 3; 2	4; 4; 4; 4; 4; 4; 3; 3; 2	4; 4; 4; 4; 4; 4; 3; 3; 2	4	By MS/MS; By MS/MS; By MS/MS; By MS/MS; By MS/MS; By MS/MS; By MS/MS; By MS/MS; By MS/MS	32; 32; 25.4; 30.3; 32; 38.5; 25.4; 25.4; 16.4	125740; 106930; 110010; 44662; 91205; 47517; 29659; 48325; 62678	89838; 71918; 69352; 25160; 34497; 16453; 14059; 43544; 33147	6; 4; 3; 4; 3; 0; 5; 3; 5	3; 2; 3; 2; 4; 5; 4; 3; 4	3; 2; 3; 2; 4; 5; 4; 3; 4	3; 2; 3; 2; 4; 5; 4; 3; 4	3	By MS/MS; By MS/MS; By matching; By MS/MS; By MS/MS; By MS/MS; By MS/MS; By MS/MS; By MS/MS	23; 23; 24.6; 23; 39.3; 39.3; 38.5; 29.5; 38.5	39872; 49741; 31836; 5428.1; 102350; 146670; 112040; 40099; 109390	30408; 0; 22794; 0; 59081; 68176; 78667; 49687; 61185	1; 2; 0; 2; 1; 4; 5; 1; 2
all4209	0.00171208	1	false	truth	0.394648	0.456947	#N/A	1.81523	#N/A	#N/A	3; 4; 4; 3; 4; 3; 3; 3; 3	3; 4; 4; 3; 4; 3; 3; 3; 3	3; 4; 4; 3; 4; 3; 3; 3; 3	3	By MS/MS; By MS/MS; By MS/MS; By MS/MS; By MS/MS; By matching; By MS/MS; By MS/MS; By MS/MS	14.6; 20.8; 18.1; 11.9; 18.5; 14.2; 14.2; 14.2; 14.2	23328; 53068; 648450; 19252; 243890; 14832; 96794; 96440; 94095	24268; 0; 0; 22758; 101120; 37355; 64103; 82507; 0	1; 1; 2; 2; 1; 0; 1; 3; 3	1; 3; 3; 2; 2; 4; 3; 1; 3	1; 3; 3; 2; 2; 4; 3; 1; 3	1; 3; 3; 2; 2; 4; 3; 1; 3	3	By matching; By MS/MS; By MS/MS; By matching; By matching; By MS/MS; By MS/MS; By matching; By MS/MS	3.8; 14.6; 12.3; 7.7; 10.4; 23.5; 13.8; 6.5; 13.8	469630; 5113.2; 492020; 17554; 18114; 24578; 144820; 11883; 153540	0; 0; 231730; 0; 0; 48740; 0; 0; 0	0; 2; 2; 0; 0; 2; 2; 0; 1
all4210	0.716523	1	false	truth	0.906793	0.594065	0.407012	0.175444	0.611747	1.58773	2; 2; 3; 1; 2; 2; 3; 2; 3	2; 2; 3; 1; 2; 2; 3; 2; 3	2; 2; 3; 1; 2; 2; 3; 2; 3	2	By MS/MS; By MS/MS; By MS/MS; By MS/MS; By MS/MS; By MS/MS; By MS/MS; By MS/MS; By MS/MS	18.5; 24.4; 32.8; 14.3; 28.6; 24.4; 38.7; 28.6; 38.7	1882.4; 2664.5; 19718; 16863; 12427; 33616; 38516; 5570.5; 10039	0; 0; 16877; 16412; 0; 15478; 27697; 17377; 28136	0; 2; 4; 1; 2; 2; 5; 1; 5	1; 3; 4; 2; 4; 3; 4; 0; 4	1; 3; 4; 2; 4; 3; 4; 0; 4	1; 3; 4; 2; 4; 3; 4; 0; 4	3	By matching; By MS/MS; By MS/MS; By MS/MS; By MS/MS; By MS/MS; By MS/MS; By matching; By MS/MS	10.1; 32.8; 47.1; 28.6; 39.5; 38.7; 47.1; 0; 37.8	0; 10972; 24505; 64653; 66525; 29305; 31070; 0; 61497	0; 7982.2; 12299; 56061; 35498; 9839.5; 19445; 0; 30582	0; 3; 2; 4; 2; 2; 4; 0; 6
all4212	0.443075	1	false	truth	1.1889	0.376079	0.530824	0.0438682	0.69785	1.78905	3; 3; 2; 2; 0; 2; 3; 1; 0	3; 3; 2; 2; 0; 2; 3; 1; 0	3; 3; 2; 2; 0; 2; 3; 1; 0	2	By MS/MS; By MS/MS; By MS/MS; By MS/MS; By matching; By MS/MS; By MS/MS; By MS/MS; By matching	13.2; 12.9; 7.7; 9.1; 0; 9.1; 12.9; 5.2; 0	8665.1; 9531.2; 1609.7; 1592.6; 0; 20112; 5572.2; 0; 0	56373; 38694; 0; 0; 0; 59484; 0; 0; 0	5; 1; 2; 2; 0; 1; 1; 1; 0	1; 2; 1; 4; 3; 3; 3; 3; 1	1; 2; 1; 4; 3; 3; 3; 3; 1	1; 2; 1; 4; 3; 3; 3; 3; 1	3	By matching; By matching; By matching; By MS/MS; By MS/MS; By MS/MS; By MS/MS; By MS/MS; By MS/MS	3.8; 8; 3.8; 25.8; 13.2; 13.2; 12.9; 13.2; 5.2	72.877; 49714; 40.993; 1759.8; 21946; 15325; 3085.7; 14775; 8811	0; 0; 0; 0; 0; 44167; 0; 49867; 0	0; 0; 0; 3; 1; 2; 2; 1; 3
all4213	0.112317	1	false	false	2.28008	1.75159	#N/A	1.28195	#N/A	#N/A	1; 1; 4; 1; 3; 2; 1; 1; 0	1; 1; 4; 1; 3; 2; 1; 1; 0	1; 1; 4; 1; 3; 2; 1; 1; 0	1	By MS/MS; By MS/MS; By MS/MS; By MS/MS; By MS/MS; By matching; By MS/MS; By matching; By matching	9.6; 9.6; 37.5; 9.6; 29.8; 21.2; 9.6; 8.7; 0	34792; 36784; 33816; 44939; 64439; 91260; 48245; 1863.3; 0	0; 0; 50021; 0; 24671; 36951; 0; 0; 0	3; 2; 5; 2; 1; 0; 1; 0; 0	1; 2; 2; 2; 1; 1; 1; 1; 1	1; 2; 2; 2; 1; 1; 1; 1; 1	1; 2; 2; 2; 1; 1; 1; 1; 1	1	By MS/MS; By MS/MS; By MS/MS; By MS/MS; By MS/MS; By MS/MS; By MS/MS; By matching; By MS/MS	9.6; 17.3; 21.2; 21.2; 9.6; 9.6; 9.6; 8.7; 9.6	22975; 29246; 24971; 68228; 61559; 87531; 66225; 33.01; 42513	0; 24741; 0; 13344; 0; 0; 0; 0; 0	1; 2; 3; 1; 1; 3; 1; 0; 3
all4214	0.623314	1	false	truth	1.07006	0.437932	0.254859	0.0377281	0.848842	1.37519	5; 2; 4; 5; 4; 4; 4; 3; 4	5; 2; 4; 5; 4; 4; 4; 3; 4	5; 2; 4; 5; 4; 4; 4; 3; 4	4	By MS/MS; By MS/MS; By MS/MS; By MS/MS; By MS/MS; By MS/MS; By MS/MS; By MS/MS; By MS/MS	29.5; 16.7; 21.4; 29.5; 29.5; 28.6; 24.8; 24.8; 28.6	37531; 54397; 47498; 170450; 116370; 98750; 83573; 86645; 42239	48763; 54966; 32163; 72500; 68483; 50615; 53809; 54159; 44925	7; 3; 7; 11; 12; 3; 9; 11; 10	3; 4; 4; 5; 3; 3; 3; 3; 3	3; 4; 4; 5; 3; 3; 3; 3; 3	3; 4; 4; 5; 3; 3; 3; 3; 3	3	By MS/MS; By MS/MS; By MS/MS; By MS/MS; By MS/MS; By MS/MS; By MS/MS; By MS/MS; By MS/MS	16.7; 24.8; 21.4; 29.5; 24.8; 24.8; 24.8; 24.8; 24.8	37580; 30453; 55275; 218840; 80736; 79895; 41421; 34511; 68117	65818; 54946; 36848; 59701; 71344; 55764; 38413; 34570; 42552	2; 3; 6; 6; 5; 6; 5; 3; 5
all4215	0.967037	1	false	truth	1.01005	0.664675	0.419664	0.0229279	0.608536	1.45898	4; 5; 2; 5; 4; 1; 2; 3; 5	4; 5; 2; 5; 4; 1; 2; 3; 5	4; 5; 2; 5; 4; 1; 2; 3; 5	4	By MS/MS; By MS/MS; By MS/MS; By MS/MS; By MS/MS; By MS/MS; By MS/MS; By MS/MS; By MS/MS	28.9; 33.6; 16.1; 33.6; 30.8; 9; 17.5; 31.8; 47.9	8368.3; 11597; 4696.6; 30321; 19444; 19663; 21573; 39919; 20171	4029.6; 3300; 0; 13721; 21446; 23299; 13363; 24584; 11264	1; 1; 1; 9; 2; 2; 3; 3; 4	2; 3; 0; 1; 2; 5; 3; 4; 4	2; 3; 0; 1; 2; 5; 3; 4; 4	2; 3; 0; 1; 2; 5; 3; 4; 4	3	By matching; By matching; By matching; By MS/MS; By MS/MS; By MS/MS; By MS/MS; By MS/MS; By MS/MS	17.1; 25.6; 0; 9; 23.2; 39.8; 17.1; 37.4; 31.3	5912.9; 16837; 0; 7462.2; 11649; 78665; 38679; 33545; 28339	9173.1; 8878.1; 0; 0; 15001; 18238; 18339; 19172; 14531	0; 0; 0; 3; 2; 4; 6; 0; 2
all4257	0.717936	1	false	truth	0.945492	0.347707	0.257624	0.0377152	0.717323	1.24777	6; 3; 8; 3; 3; 5; 5; 5; 6	6; 3; 8; 3; 3; 5; 5; 5; 6	6; 3; 8; 3; 3; 5; 5; 5; 6	5	By MS/MS; By MS/MS; By MS/MS; By MS/MS; By MS/MS; By MS/MS; By MS/MS; By MS/MS; By MS/MS	16; 12.4; 21.8; 8; 10.5; 15.8; 16; 14.9; 21.8	62427; 13976; 52571; 7094.6; 11118; 40089; 38665; 30416; 6268.5	23960; 22861; 14885; 0; 16245; 15756; 26607; 32501; 0	5; 3; 4; 4; 2; 1; 4; 4; 7	1; 5; 2; 3; 2; 4; 4; 3; 2	1; 5; 2; 3; 2; 4; 4; 3; 2	1; 5; 2; 3; 2; 4; 4; 3; 2	3	By matching; By MS/MS; By matching; By MS/MS; By MS/MS; By MS/MS; By MS/MS; By matching; By MS/MS	3.2; 16.4; 5.2; 9.5; 6.5; 13.5; 12; 9.4; 6.1	2936.5; 9349.7; 14226; 53391; 25182; 12857; 42621; 51575; 21039	0; 0; 0; 37532; 26122; 0; 24431; 27367; 13537	0; 2; 0; 5; 1; 4; 4; 0; 2
all4272	0.162841	1	false	truth	0.741303	0.208311	#N/A	0.109333	#N/A	#N/A	3; 3; 2; 5; 0; 2; 1; 2; 0	3; 3; 2; 5; 0; 2; 1; 2; 0	3; 3; 2; 5; 0; 2; 1; 2; 0	2	By MS/MS; By matching; By MS/MS; By MS/MS; By matching; By MS/MS; By matching; By matching; By matching	11.7; 12.5; 9; 20.2; 0; 9.3; 4.3; 9; 0	7065.1; 14926; 2464.5; 33024; 0; 2483.5; 1072.2; 4354.6; 0	4492.2; 0; 0; 0; 0; 0; 0; 0; 0	1; 0; 3; 2; 0; 2; 0; 0; 0	4; 3; 3; 0; 1; 3; 1; 1; 2	4; 3; 3; 0; 1; 3; 1; 1; 2	4; 3; 3; 0; 1; 3; 1; 1; 2	2	By MS/MS; By MS/MS; By matching; By matching; By MS/MS; By MS/MS; By MS/MS; By matching; By MS/MS	14.1; 11.4; 11.7; 0; 4.3; 10.1; 4.3; 4.3; 6.6	11713; 17898; 7268.5; 0; 8199.5; 11249; 0; 2131.3; 4546	0; 7935.9; 4616.4; 0; 0; 5773.7; 0; 0; 5044.7	2; 2; 0; 0; 1; 4; 2; 0; 3
all4296	0.034327	1	false	truth	Infinity	#N/A	#N/A	#N/A	#N/A	#N/A	0; 2; 1; 2; 2; 2; 1; 0; 2	0; 2; 1; 2; 2; 2; 1; 0; 2	0; 2; 1; 2; 2; 2; 1; 0; 2	2	By matching; By matching; By MS/MS; By MS/MS; By matching; By MS/MS; By MS/MS; By matching; By MS/MS	0; 6.4; 3.8; 6.2; 6.2; 6.2; 3.8; 0; 6.2	0; 4311.8; 1266.3; 8289.7; 9432.8; 20352; 3035.3; 0; 5415.7	0; 2972.6; 0; 3380.3; 0; 0; 0; 0; 5235.9	0; 0; 1; 1; 0; 0; 2; 0; 2	1; 1; 1; 1; 1; 2; 1; 1; 0	1; 1; 1; 1; 1; 2; 1; 1; 0	1; 1; 1; 1; 1; 2; 1; 1; 0	1	By matching; By matching; By matching; By MS/MS; By matching; By MS/MS; By matching; By matching; By matching	3.8; 3.8; 3.8; 3.8; 3.8; 4.8; 3.8; 3.8; 0	1822.7; 1593.5; 3148.6; 3043.2; 3605.9; 6021.6; 2396.9; 887.83; 0	0; 0; 0; 0; 0; 0; 0; 0; 0	0; 0; 0; 1; 0; 1; 0; 0; 0
all4336	0.64497	1	false	truth	0.756646	0.84236	0.888808	0.486922	0.0410814	2.90836	1; 2; 1; 2; 2; 4; 1; 1; 1	1; 2; 1; 2; 2; 4; 1; 1; 1	1; 2; 1; 2; 2; 4; 1; 1; 1	1	By MS/MS; By MS/MS; By MS/MS; By MS/MS; By MS/MS; By MS/MS; By MS/MS; By MS/MS; By MS/MS	11.4; 24.8; 11.4; 12.4; 12.4; 26.7; 11.4; 11.4; 11.4	38937; 36667; 30898; 39276; 41711; 163430; 62250; 69344; 61599	0; 12413; 0; 20005; 20869; 73782; 0; 0; 0	3; 3; 3; 4; 3; 3; 3; 2; 4	1; 2; 2; 1; 2; 1; 2; 2; 2	1; 2; 2; 1; 2; 1; 2; 2; 2	1; 2; 2; 1; 2; 1; 2; 2; 2	2	By MS/MS; By MS/MS; By MS/MS; By MS/MS; By MS/MS; By MS/MS; By MS/MS; By MS/MS; By MS/MS	11.4; 24.8; 24.8; 11.4; 12.4; 11.4; 24.8; 24.8; 24.8	0; 13784; 19615; 178080; 2397.5; 118220; 83451; 85456; 106030	0; 0; 0; 0; 0; 0; 31347; 33435; 69075	1; 4; 6; 3; 2; 2; 4; 1; 6
all4337	0.955291	1	false	truth	0.992018	0.41887	0.243766	0.0290874	0.772568	1.27091	18; 17; 17; 15; 17; 18; 20; 21; 18	18; 17; 17; 15; 17; 18; 20; 21; 18	18; 17; 17; 15; 17; 18; 20; 21; 18	18	By MS/MS; By MS/MS; By MS/MS; By MS/MS; By MS/MS; By MS/MS; By MS/MS; By MS/MS; By MS/MS	63.3; 57.9; 60.4; 56; 57.7; 63.1; 75.6; 77.3; 66	659030; 673320; 557080; 948010; 925480; 791670; 629850; 623550; 695940	799670; 595500; 408980; 635970; 659890; 373630; 424130; 398710; 367270	26; 20; 26; 25; 18; 11; 25; 28; 30	16; 17; 15; 18; 19; 19; 18; 16; 15	16; 17; 15; 18; 19; 19; 18; 16; 15	16; 17; 15; 18; 19; 19; 18; 16; 15	17	By MS/MS; By MS/MS; By MS/MS; By MS/MS; By MS/MS; By MS/MS; By MS/MS; By MS/MS; By MS/MS	57.5; 66.5; 56.5; 67.7; 68.5; 68.9; 62.1; 59.2; 53.8	604070; 519260; 467320; 1352800; 1383400; 1173500; 917560; 870340; 920970	603510; 407530; 572170; 689020; 711100; 428160; 380050; 434510; 597820	13; 18; 10; 19; 20; 17; 25; 13; 14
all4338	0.0827947	1	false	truth	0.839497	0.216354	0.12591	0.0184902	0.727242	0.983383	12; 11; 14; 11; 13; 14; 15; 14; 15	12; 11; 14; 11; 13; 14; 15; 14; 15	12; 11; 14; 11; 13; 14; 15; 14; 15	14	By MS/MS; By MS/MS; By MS/MS; By MS/MS; By MS/MS; By MS/MS; By MS/MS; By MS/MS; By MS/MS	27.6; 23.8; 31.8; 24.6; 32.1; 27.7; 31.8; 30.3; 38.3	114470; 111810; 104360; 96567; 114770; 246280; 183350; 79815; 176860	91122; 92429; 77560; 70626; 71640; 91063; 103040; 70175; 93884	19; 9; 20; 14; 15; 10; 22; 11; 21	11; 13; 15; 13; 10; 14; 13; 13; 12	11; 13; 15; 13; 10; 14; 13; 13; 12	11; 13; 15; 13; 10; 14; 13; 13; 12	13	By MS/MS; By MS/MS; By MS/MS; By MS/MS; By MS/MS; By MS/MS; By MS/MS; By MS/MS; By MS/MS	23.7; 28.8; 27; 31.5; 25.9; 35.1; 31.9; 23; 25.4	86111; 117880; 146320; 192630; 201490; 203320; 174400; 127170; 149090	83435; 81265; 72099; 160910; 143980; 119330; 98205; 98958; 93015	8; 16; 14; 13; 14; 20; 26; 5; 14
all4339	0.0109548	1	false	truth	1.60983	0.618009	0.43738	0.0413997	1.22725	2.13145	2; 2; 2; 1; 1; 4; 2; 2; 2	2; 2; 2; 1; 1; 4; 2; 2; 2	2; 2; 2; 1; 1; 4; 2; 2; 2	2	By MS/MS; By MS/MS; By MS/MS; By MS/MS; By matching; By MS/MS; By MS/MS; By MS/MS; By MS/MS	15.4; 19.2; 15.4; 10.9; 4.5; 30.8; 17.9; 15.4; 15.4	19913; 47380; 44667; 72120; 10886; 113020; 80128; 92968; 72222	37588; 0; 53987; 43798; 0; 68644; 46042; 58363; 45357	1; 2; 3; 1; 0; 2; 2; 4; 3	1; 3; 5; 1; 2; 5; 2; 3; 3	1; 3; 5; 1; 2; 5; 2; 3; 3	1; 3; 5; 1; 2; 5; 2; 3; 3	3	By matching; By MS/MS; By MS/MS; By matching; By matching; By MS/MS; By MS/MS; By MS/MS; By MS/MS	10.9; 23.7; 35.3; 4.5; 9; 35.3; 15.4; 22.4; 19.9	39156; 11301; 69663; 14299; 8480; 115350; 52211; 51948; 78911	0; 25963; 30344; 0; 0; 44075; 36857; 19579; 40482	0; 1; 1; 0; 0; 3; 1; 2; 2
all4343	0.363974	1	false	truth	0.879197	0.33836	0.2054	0.0360411	0.700298	1.12384	5; 7; 8; 4; 2; 3; 7; 6; 7	5; 7; 8; 4; 2; 3; 7; 6; 7	5; 7; 8; 4; 2; 3; 7; 6; 7	6	By MS/MS; By MS/MS; By MS/MS; By MS/MS; By matching; By matching; By MS/MS; By MS/MS; By MS/MS	10.3; 17.6; 19.1; 7.9; 4.7; 5.9; 17.4; 13.5; 16.8	41466; 59607; 58322; 27854; 18166; 21335; 42651; 35372; 35089	20854; 24517; 26424; 18032; 32832; 24288; 20509; 20836; 26917	4; 3; 7; 2; 0; 0; 5; 4; 5	4; 6; 5; 10; 4; 9; 6; 4; 5	4; 6; 5; 10; 4; 9; 6; 4; 5	4; 6; 5; 10; 4; 9; 6; 4; 5	5	By MS/MS; By MS/MS; By MS/MS; By MS/MS; By MS/MS; By MS/MS; By MS/MS; By MS/MS; By MS/MS	8.6; 12.7; 10.6; 24.1; 8.6; 22.3; 15.2; 10.5; 12.7	15657; 19959; 61206; 86616; 34615; 55386; 49111; 29233; 17807	0; 16108; 42864; 46817; 24696; 27091; 35264; 26146; 18969	3; 4; 3; 6; 2; 6; 7; 1; 3
all4358	0.0286948	1	false	truth	0.598648	0.246558	0.166092	0.0626441	0.462501	0.814811	3; 3; 3; 3; 2; 3; 4; 3; 3	3; 3; 3; 3; 2; 3; 4; 3; 3	3; 3; 3; 3; 2; 3; 4; 3; 3	3	By MS/MS; By MS/MS; By MS/MS; By MS/MS; By MS/MS; By MS/MS; By MS/MS; By MS/MS; By MS/MS	19.1; 19.1; 17.3; 17.3; 13.6; 13.2; 19.1; 19.1; 19.1	27427; 23624; 34770; 42905; 0; 67462; 61047; 34111; 49438	0; 29161; 23170; 25613; 0; 32918; 32188; 35791; 25278	9; 5; 8; 6; 3; 2; 7; 6; 7	2; 3; 3; 3; 3; 3; 3; 2; 3	2; 3; 3; 3; 3; 3; 3; 2; 3	2; 3; 3; 3; 3; 3; 3; 2; 3	3	By MS/MS; By MS/MS; By MS/MS; By MS/MS; By MS/MS; By MS/MS; By MS/MS; By MS/MS; By MS/MS	13.2; 19.1; 19.1; 13.2; 19.1; 19.1; 19.1; 13.2; 19.1	38891; 47447; 28603; 68536; 120610; 132470; 76395; 86324; 46212	33917; 37007; 0; 26317; 63193; 75513; 69694; 52683; 0	7; 7; 4; 3; 5; 7; 7; 2; 7
all4377	0.31562	1	false	false	1.15501	0.202254	#N/A	#N/A	#N/A	#N/A	1; 1; 1; 2; 2; 0; 2; 1; 2	1; 1; 1; 2; 2; 0; 2; 1; 2	1; 1; 1; 2; 2; 0; 2; 1; 2	1	By matching; By MS/MS; By MS/MS; By MS/MS; By MS/MS; By matching; By MS/MS; By MS/MS; By MS/MS	11.4; 13.3; 13.3; 24.7; 24.7; 0; 24.7; 13.3; 24.7	2645.1; 7054.6; 9813.3; 41834; 35574; 0; 30613; 22314; 13222	0; 0; 0; 22215; 28258; 0; 26245; 0; 0	0; 1; 1; 5; 3; 0; 1; 2; 1	1; 1; 1; 1; 2; 2; 1; 1; 1	1; 1; 1; 1; 2; 2; 1; 1; 1	1; 1; 1; 1; 2; 2; 1; 1; 1	1	By matching; By matching; By matching; By MS/MS; By MS/MS; By MS/MS; By MS/MS; By MS/MS; By MS/MS	13.3; 11.4; 13.3; 13.3; 24.7; 24.7; 11.4; 11.4; 13.3	1905.8; 4131.2; 2830.5; 0; 2510.3; 33840; 6000.4; 8285.3; 0	0; 0; 0; 0; 0; 24324; 0; 0; 0	0; 0; 0; 2; 1; 1; 1; 1; 1
all4379	0.434733	1	false	truth	1.11602	0.801671	1.16885	0.0756233	0	2.42647	1; 2; 2; 2; 0; 2; 3; 3; 1	1; 2; 2; 2; 0; 2; 3; 3; 1	1; 2; 2; 2; 0; 2; 3; 3; 1	2	By MS/MS; By matching; By matching; By matching; By matching; By matching; By MS/MS; By MS/MS; By MS/MS	1.9; 5.2; 7.4; 7; 0; 5.6; 8.9; 9.3; 3.3	3220.4; 3634.2; 5558.5; 2790.2; 0; 8493.2; 3563.9; 4583.3; 1726.3	0; 0; 0; 0; 0; 9207.1; 0; 3415.8; 0	1; 0; 0; 0; 0; 0; 4; 1; 1	1; 0; 1; 3; 2; 2; 3; 1; 4	1; 0; 1; 3; 2; 2; 3; 1; 4	1; 0; 1; 3; 2; 2; 3; 1; 4	2	By matching; By matching; By matching; By MS/MS; By matching; By matching; By MS/MS; By matching; By matching	3.3; 0; 1.9; 8.9; 7.8; 5.9; 9.6; 1.9; 12.6	1700.1; 0; 1817.9; 12099; 6534.5; 14076; 9699.9; 4109.8; 7584.3	0; 0; 0; 11492; 0; 7255.3; 6588.8; 0; 3954.8	0; 0; 0; 4; 0; 0; 2; 0; 0
all4387	0.0136226	1	false	truth	0	#N/A	#N/A	#N/A	#N/A	#N/A	2; 1; 1; 1; 3; 3; 2; 1; 1	2; 1; 1; 1; 3; 3; 2; 1; 1	2; 1; 1; 1; 3; 3; 2; 1; 1	1	By MS/MS; By MS/MS; By MS/MS; By MS/MS; By MS/MS; By MS/MS; By MS/MS; By MS/MS; By MS/MS	9; 8.3; 8.3; 7.6; 20.5; 18.3; 12.2; 7.6; 7.6	7241.1; 0; 0; 3683.1; 20097; 13873; 3179.6; 2260.1; 3632.4	0; 0; 0; 0; 0; 0; 0; 0; 0	1; 0; 0; 2; 1; 1; 2; 0; 0	3; 1; 1; 2; 2; 3; 2; 0; 2	3; 1; 1; 2; 2; 3; 2; 0; 2	3; 1; 1; 2; 2; 3; 2; 0; 2	2	By MS/MS; By MS/MS; By MS/MS; By MS/MS; By MS/MS; By MS/MS; By MS/MS; By matching; By MS/MS	16.5; 7.6; 7.6; 12.9; 12.9; 20.5; 12.6; 0; 12.2	24885; 1198.6; 1318.4; 31884; 22621; 10880; 2079.6; 0; 20411	9564.4; 0; 0; 0; 0; 8144; 0; 0; 9787.4	2; 0; 2; 0; 0; 2; 0; 0; 1
all4388	0.112195	1	false	truth	0.610143	0.437832	0.29436	0.119601	0.368548	1.01751	4; 5; 3; 2; 2; 3; 2; 4; 1	4; 5; 3; 2; 2; 3; 2; 4; 1	4; 5; 3; 2; 2; 3; 2; 4; 1	3	By MS/MS; By MS/MS; By MS/MS; By MS/MS; By MS/MS; By MS/MS; By MS/MS; By MS/MS; By MS/MS	12.4; 16.4; 9.7; 7.3; 7.1; 9.5; 7.1; 13.4; 4.1	22457; 28093; 12960; 6863.8; 13840; 7630.7; 6794.9; 2831.4; 6298.4	16406; 12630; 14284; 6786.3; 8510; 3672.6; 0; 0; 0	4; 5; 3; 3; 1; 1; 4; 5; 4	3; 3; 6; 3; 5; 6; 6; 4; 8	3; 3; 6; 3; 5; 6; 6; 4; 8	3; 3; 6; 3; 5; 6; 6; 4; 8	5	By MS/MS; By MS/MS; By MS/MS; By MS/MS; By MS/MS; By MS/MS; By MS/MS; By MS/MS; By MS/MS	9.3; 9.1; 18.3; 11.2; 19.7; 19.7; 19.5; 13.6; 27.2	24984; 21203; 52020; 6842; 28696; 17163; 42178; 31256; 59900	9994.4; 25341; 33207; 0; 9075.6; 11937; 25026; 8294.9; 15175	6; 7; 7; 3; 3; 5; 10; 1; 7
all4396	0.125978	1	false	truth	0.831505	0.282703	0.164522	0.0194995	0.681071	1.01501	10; 13; 9; 11; 11; 12; 12; 11; 13	10; 13; 9; 11; 11; 12; 12; 11; 13	10; 13; 9; 11; 11; 12; 12; 11; 13	11	By MS/MS; By MS/MS; By MS/MS; By MS/MS; By MS/MS; By MS/MS; By MS/MS; By MS/MS; By MS/MS	22; 24.5; 17.8; 23.3; 21.7; 22.3; 22.6; 21.3; 27.6	152700; 170090; 149170; 226830; 206680; 221500; 101130; 112560; 140600	118260; 107460; 94853; 117330; 110520; 69021; 79640; 64266; 73467	10; 5; 11; 12; 8; 8; 10; 11; 13	11; 11; 12; 13; 11; 13; 15; 14; 16	11; 11; 12; 13; 11; 13; 15; 14; 16	11; 11; 12; 13; 11; 13; 15; 14; 16	13	By MS/MS; By MS/MS; By MS/MS; By MS/MS; By MS/MS; By MS/MS; By MS/MS; By MS/MS; By MS/MS	22; 21.7; 23.5; 24.4; 21.6; 25.9; 31.3; 27.2; 29.7	178280; 109360; 83924; 249070; 213100; 320900; 314870; 162020; 296750	122730; 113630; 76987; 117470; 121470; 164070; 122960; 82830; 118380	9; 10; 11; 16; 11; 21; 29; 3; 16
all4464	0.00706731	1	false	truth	1.77259	0.592329	0.496791	0.0425807	1.33763	2.36523	4; 3; 2; 4; 3; 2; 2; 3; 4	4; 3; 2; 4; 3; 2; 2; 3; 4	4; 3; 2; 4; 3; 2; 2; 3; 4	3	By MS/MS; By MS/MS; By MS/MS; By MS/MS; By MS/MS; By MS/MS; By MS/MS; By MS/MS; By MS/MS	31.1; 23.7; 14.5; 23.7; 19.5; 14.9; 14.9; 23.7; 28.2	33971; 51300; 37454; 10491; 52355; 73443; 10058; 15233; 94359	33391; 53847; 37859; 0; 57407; 35417; 0; 0; 35348	2; 4; 2; 4; 4; 1; 2; 3; 5	0; 2; 3; 1; 2; 3; 2; 2; 3	0; 2; 3; 1; 2; 3; 2; 2; 3	0; 2; 3; 1; 2; 3; 2; 2; 3	2	By matching; By MS/MS; By MS/MS; By matching; By MS/MS; By MS/MS; By MS/MS; By matching; By MS/MS	0; 10.4; 14.9; 5.8; 13.7; 23.7; 13.7; 16.6; 23.7	0; 9378.9; 16698; 2763.7; 9185.6; 48933; 23542; 39322; 38577	0; 0; 0; 0; 0; 29632; 19406; 28634; 25068	0; 1; 4; 0; 1; 1; 2; 0; 2
all4481	0.323998	1	false	truth	0.949106	0.0821416	0.0876394	0.00849428	0.868848	1.04563	4; 2; 3; 2; 3; 4; 3; 2; 4	4; 2; 3; 2; 3; 4; 3; 2; 4	4; 2; 3; 2; 3; 4; 3; 2; 4	3	By matching; By MS/MS; By MS/MS; By matching; By MS/MS; By MS/MS; By MS/MS; By MS/MS; By MS/MS	13.4; 9; 10.1; 9; 13.1; 16.1; 10.4; 6.6; 15.8	11542; 15050; 5500.5; 7832.7; 10592; 10597; 8867.5; 2961.2; 0	7801.5; 0; 0; 0; 0; 7067.2; 0; 0; 0	0; 1; 1; 0; 0; 1; 5; 1; 4	1; 4; 4; 2; 4; 3; 4; 2; 2	1; 4; 4; 2; 4; 3; 4; 2; 2	1; 4; 4; 2; 4; 3; 4; 2; 2	3	By matching; By MS/MS; By MS/MS; By MS/MS; By MS/MS; By MS/MS; By MS/MS; By matching; By MS/MS	2.5; 13.1; 14.5; 9.3; 19.9; 15.6; 16.4; 6.6; 7.9	2511.8; 14033; 14175; 14505; 23410; 11095; 10323; 9751.3; 9301.4	0; 0; 0; 11359; 8397.8; 8251.7; 9591.4; 0; 0	0; 1; 1; 1; 1; 3; 4; 0; 2
all4506	0.238134	1	false	truth	1.27157	0.282781	#N/A	#N/A	#N/A	#N/A	3; 2; 1; 2; 2; 0; 0; 2; 1	3; 2; 1; 2; 2; 0; 0; 2; 1	3; 2; 1; 2; 2; 0; 0; 2; 1	2	By MS/MS; By matching; By MS/MS; By MS/MS; By MS/MS; By matching; By matching; By MS/MS; By MS/MS	19.8; 14.8; 9.7; 10.1; 14.8; 0; 0; 14.8; 5.1	26200; 22358; 0; 15238; 11690; 0; 0; 11439; 0	10702; 0; 0; 0; 9053.8; 0; 0; 13959; 0	1; 0; 1; 1; 1; 0; 0; 2; 2	2; 2; 2; 1; 1; 1; 1; 0; 1	2; 2; 2; 1; 1; 1; 1; 0; 1	2; 2; 2; 1; 1; 1; 1; 0; 1	1	By MS/MS; By MS/MS; By MS/MS; By matching; By matching; By matching; By MS/MS; By matching; By matching	10.1; 14.8; 10.1; 9.7; 9.7; 5.1; 5.1; 0; 9.7	17057; 7800.6; 8778.9; 3569.5; 3569.5; 1520.6; 9588.5; 0; 2429.7	0; 8552.5; 0; 0; 0; 0; 0; 0; 0	1; 1; 1; 0; 0; 0; 2; 0; 0
all4555	0.49435	1	false	truth	1.15507	0.622161	0.421299	0.0713364	0.797703	1.68989	0; 3; 4; 6; 4; 4; 5; 5; 2	0; 3; 4; 6; 4; 4; 5; 5; 2	0; 3; 4; 6; 4; 4; 5; 5; 2	4	By matching; By MS/MS; By MS/MS; By MS/MS; By MS/MS; By MS/MS; By MS/MS; By MS/MS; By MS/MS	0; 12.3; 20; 28.3; 17.7; 18.3; 21.4; 24.6; 8.3	0; 41524; 26296; 33700; 35510; 50773; 48386; 27044; 26234	0; 28337; 9876.4; 15186; 16680; 28718; 15672; 10757; 23976	0; 1; 5; 6; 3; 3; 5; 4; 6	2; 3; 1; 4; 4; 2; 3; 2; 6	2; 3; 1; 4; 4; 2; 3; 2; 6	2; 3; 1; 4; 4; 2; 3; 2; 6	3	By matching; By MS/MS; By MS/MS; By MS/MS; By MS/MS; By MS/MS; By MS/MS; By MS/MS; By MS/MS	10; 16.9; 4.6; 16.9; 17.7; 8.3; 11.4; 7.7; 22.3	5152.4; 8450.8; 7133.6; 16625; 14561; 17264; 25944; 29181; 36341	11230; 0; 0; 0; 14188; 18047; 13114; 29079; 13083	0; 4; 1; 7; 2; 1; 2; 1; 5
all4563	0.00737355	1	false	truth	2.23974	1.6315	0.949469	0.109851	1.47252	3.55975	9; 9; 10; 9; 10; 8; 10; 10; 12	9; 9; 10; 9; 10; 8; 10; 10; 12	9; 9; 10; 9; 10; 8; 10; 10; 12	10	By MS/MS; By MS/MS; By MS/MS; By MS/MS; By MS/MS; By MS/MS; By MS/MS; By MS/MS; By MS/MS	42.3; 30.6; 33.1; 35.4; 47.1; 36.2; 51.3; 46.2; 49.6	243570; 412390; 340850; 554090; 522780; 464630; 856970; 371030; 959680	282820; 258140; 319360; 345430; 296700; 625250; 599540; 107400; 416080	22; 14; 20; 39; 18; 6; 12; 10; 20	9; 8; 8; 6; 5; 6; 8; 10; 10	9; 8; 8; 6; 5; 6; 8; 10; 10	9; 8; 8; 6; 5; 6; 8; 10; 10	8	By MS/MS; By MS/MS; By MS/MS; By MS/MS; By MS/MS; By MS/MS; By MS/MS; By MS/MS; By MS/MS	34.8; 31.8; 25.1; 28.4; 19.2; 28.4; 45.1; 47.6; 53.5	69353; 103290; 200370; 220440; 232820; 81602; 144200; 396720; 309480	95981; 143130; 316070; 123200; 125110; 69436; 103850; 248300; 237080	5; 13; 4; 3; 3; 2; 4; 2; 6
all4575	0.2124	1	false	truth	1.33824	0.736928	0.496425	0.0534249	0.897973	1.92958	3; 2; 5; 4; 1; 3; 4; 3; 4	3; 2; 5; 4; 1; 3; 4; 3; 4	3; 2; 5; 4; 1; 3; 4; 3; 4	3	By MS/MS; By MS/MS; By MS/MS; By MS/MS; By MS/MS; By MS/MS; By MS/MS; By MS/MS; By MS/MS	12; 9.4; 21.2; 15.1; 5.1; 10.5; 15.8; 13.8; 16.3	11907; 18254; 26043; 26859; 14803; 32508; 10923; 35796; 42924	10808; 15219; 9515.4; 29144; 26550; 0; 0; 15442; 25358	2; 1; 3; 3; 1; 1; 1; 2; 1	2; 5; 3; 3; 1; 3; 2; 2; 5	2; 5; 3; 3; 1; 3; 2; 2; 5	2; 5; 3; 3; 1; 3; 2; 2; 5	3	By MS/MS; By MS/MS; By MS/MS; By MS/MS; By matching; By MS/MS; By MS/MS; By matching; By MS/MS	9.4; 19.1; 14; 14.3; 2.6; 11.5; 6.9; 8.9; 18.9	9985.2; 15078; 28249; 20898; 23531; 22150; 41392; 12445; 29898	0; 9615.8; 15471; 18467; 0; 14693; 24650; 7514.6; 18301	1; 1; 2; 2; 0; 1; 2; 0; 2
all4613	0.427675	1	false	false	1.20189	0.536712	0.521464	0.141747	0.803535	1.99725	2; 2; 2; 3; 1; 1; 0; 1; 1	2; 2; 2; 3; 1; 1; 0; 1; 1	2; 2; 2; 3; 1; 1; 0; 1; 1	1	By matching; By MS/MS; By MS/MS; By MS/MS; By MS/MS; By MS/MS; By matching; By matching; By MS/MS	5.4; 5.7; 5.7; 9.3; 2.1; 2.1; 0; 2.1; 1.7	8351; 30816; 21641; 49896; 0; 20374; 0; 5501.1; 4170.4	13297; 18254; 14489; 21972; 0; 0; 0; 0; 0	0; 1; 1; 3; 1; 0; 0; 0; 1	2; 1; 1; 1; 1; 1; 2; 2; 2	2; 1; 1; 1; 1; 1; 2; 2; 2	2; 1; 1; 1; 1; 1; 2; 2; 2	1	By matching; By MS/MS; By MS/MS; By matching; By matching; By MS/MS; By matching; By matching; By matching	5.7; 2.1; 2.1; 2.1; 2.1; 2.8; 4.9; 5.7; 5.7	32454; 15780; 5803.2; 18791; 20450; 0; 9136.2; 27647; 32307	18571; 0; 0; 0; 0; 0; 9069.8; 14857; 12808	0; 1; 1; 0; 0; 1; 0; 0; 0
all4623	0.0373457	1	false	false	Infinity	#N/A	#N/A	#N/A	#N/A	#N/A	1; 3; 3; 3; 1; 1; 2; 1; 1	1; 3; 3; 3; 1; 1; 2; 1; 1	1; 3; 3; 3; 1; 1; 2; 1; 1	1	By MS/MS; By MS/MS; By MS/MS; By MS/MS; By MS/MS; By matching; By MS/MS; By MS/MS; By MS/MS	4.9; 24.5; 19.1; 24.5; 11.8; 7.8; 16.7; 4.9; 4.9	0; 9066.9; 17566; 7042.5; 8487.5; 6124.9; 0; 3591.1; 4458.8	0; 6639.4; 9665.1; 6200.2; 0; 0; 0; 0; 0	1; 1; 3; 1; 1; 0; 2; 1; 2	1; 2; 2; 0; 0; 0; 0; 0; 0	1; 2; 2; 0; 0; 0; 0; 0; 0	1; 2; 2; 0; 0; 0; 0; 0; 0	0	By matching; By MS/MS; By MS/MS; By matching; By matching; By matching; By matching; By matching; By matching	4.9; 19.6; 12.7; 0; 0; 0; 0; 0; 0	3453.1; 5243.2; 1536.2; 0; 0; 0; 0; 0; 0	0; 0; 0; 0; 0; 0; 0; 0; 0	0; 2; 1; 0; 0; 0; 0; 0; 0
all4645	0.977353	1	false	truth	0.993958	0.588377	0.366393	0.0381391	0.65771	1.40903	3; 2; 0; 5; 2; 4; 6; 4; 6	3; 2; 0; 5; 2; 4; 6; 4; 6	3; 2; 0; 5; 2; 4; 6; 4; 6	4	By MS/MS; By matching; By matching; By MS/MS; By matching; By matching; By MS/MS; By MS/MS; By MS/MS	8.2; 7.5; 0; 16.1; 4.9; 14.2; 19.3; 14.7; 19.8	4166.5; 5140.8; 0; 30256; 4503.3; 17140; 48489; 27962; 61415	10167; 11925; 0; 8955.7; 9401; 12821; 28832; 29344; 20614	1; 0; 0; 1; 0; 0; 8; 4; 8	4; 3; 3; 5; 5; 4; 6; 4; 3	4; 3; 3; 5; 5; 4; 6; 4; 3	4; 3; 3; 5; 5; 4; 6; 4; 3	4	By MS/MS; By MS/MS; By MS/MS; By MS/MS; By MS/MS; By MS/MS; By MS/MS; By MS/MS; By MS/MS	14.2; 11.2; 10; 15.2; 17.9; 14.2; 19.8; 13.5; 8.9	33382; 16584; 4612.2; 57867; 49247; 22523; 36194; 48275; 31795	13044; 0; 8274.5; 29999; 19479; 13111; 15579; 18335; 21418	1; 1; 2; 2; 3; 3; 3; 1; 3
all4662	0.890467	1	false	truth	0.968889	0.59697	0.386001	0.0791645	0.6414	1.46297	4; 2; 5; 3; 3; 2; 2; 3; 6	4; 2; 5; 3; 3; 2; 2; 3; 6	4; 2; 5; 3; 3; 2; 2; 3; 6	3	By MS/MS; By MS/MS; By MS/MS; By MS/MS; By matching; By MS/MS; By MS/MS; By MS/MS; By MS/MS	32.5; 19; 39.9; 25.2; 25.2; 14.1; 13.5; 23.3; 50.9	21519; 21435; 32231; 16116; 17167; 45736; 18466; 4512.9; 52211	10308; 22332; 15867; 12035; 8961.2; 32055; 25168; 0; 19138	4; 1; 4; 6; 0; 0; 3; 3; 4	1; 3; 4; 3; 4; 5; 3; 3; 4	1; 3; 4; 3; 4; 5; 3; 3; 4	1; 3; 4; 3; 4; 5; 3; 3; 4	3	By matching; By MS/MS; By MS/MS; By MS/MS; By MS/MS; By MS/MS; By MS/MS; By MS/MS; By MS/MS	6.7; 28.2; 35; 27; 30.7; 41.1; 23.3; 20.9; 32.5	2898.4; 0; 24149; 44123; 28502; 49698; 43588; 19918; 32961	0; 0; 16654; 17769; 13900; 29679; 39248; 13693; 12946	0; 3; 2; 1; 0; 4; 3; 0; 1
all4664	0.660592	1	false	truth	0.906097	0.497809	0.3439	0.109191	0.636243	1.39808	3; 1; 2; 4; 2; 2; 4; 1; 4	3; 1; 2; 4; 2; 2; 4; 1; 4	3; 1; 2; 4; 2; 2; 4; 1; 4	2	By MS/MS; By MS/MS; By MS/MS; By MS/MS; By MS/MS; By MS/MS; By MS/MS; By MS/MS; By MS/MS	33.3; 9.8; 23.5; 43.9; 23.5; 23.5; 34.1; 12.1; 32.6	15212; 9266.2; 12011; 21989; 29018; 29625; 3840.6; 0; 1349.7	9623.8; 0; 14058; 14326; 17895; 19732; 19810; 0; 0	5; 1; 3; 5; 5; 1; 3; 1; 6	3; 2; 3; 2; 1; 1; 1; 3; 2	3; 2; 3; 2; 1; 1; 1; 3; 2	3; 2; 3; 2; 1; 1; 1; 3; 2	2	By MS/MS; By MS/MS; By MS/MS; By MS/MS; By MS/MS; By MS/MS; By MS/MS; By MS/MS; By MS/MS	33.3; 23.5; 33.3; 22; 12.1; 12.1; 9.8; 22.7; 22.7	13743; 5088.7; 8090.6; 37424; 36228; 28809; 0; 30877; 33719	0; 13089; 7835.6; 15887; 31984; 24087; 0; 16803; 18666	6; 3; 3; 2; 2; 2; 1; 1; 3
all4688	0.723858	1	false	truth	0.948952	0.381819	0.237765	0.0485419	0.748849	1.24588	1; 2; 2; 3; 1; 2; 3; 3; 4	1; 2; 2; 3; 1; 2; 3; 3; 4	1; 2; 2; 3; 1; 2; 3; 3; 4	2	By MS/MS; By MS/MS; By MS/MS; By MS/MS; By MS/MS; By matching; By MS/MS; By MS/MS; By MS/MS	5.4; 11.2; 11.2; 18; 5.4; 9.5; 20; 18; 24.1	12819; 17196; 27837; 23264; 15897; 26252; 23862; 17521; 30510	13140; 12629; 19440; 15195; 0; 14595; 18699; 14095; 15363	3; 3; 5; 3; 2; 0; 4; 1; 1	4; 2; 2; 3; 2; 3; 2; 1; 3	4; 2; 2; 3; 2; 3; 2; 1; 3	4; 2; 2; 3; 2; 3; 2; 1; 3	2	By MS/MS; By MS/MS; By MS/MS; By MS/MS; By MS/MS; By MS/MS; By MS/MS; By matching; By MS/MS	23.1; 11.2; 10.5; 17.3; 13.2; 19; 11.2; 5.4; 18	13524; 16214; 11738; 48167; 33701; 15595; 24219; 21317; 21293	10615; 9641.5; 26358; 17840; 20077; 0; 19415; 14514; 14749	1; 5; 2; 2; 1; 1; 3; 0; 3
all4749	0.38156	1	false	truth	0.880558	0.359508	0.41515	0.144855	0.556651	1.50279	2; 2; 3; 2; 2; 1; 1; 2; 1	2; 2; 3; 2; 2; 1; 1; 2; 1	2; 2; 3; 2; 2; 1; 1; 2; 1	2	By MS/MS; By matching; By MS/MS; By matching; By matching; By matching; By matching; By MS/MS; By MS/MS	12.7; 12.7; 23.9; 23.9; 12.7; 9.7; 12.7; 12.7; 9.7	13616; 12229; 14632; 16010; 18528; 5627.5; 57971; 71491; 7136.6	16549; 13435; 14932; 0; 17635; 0; 0; 26311; 0	1; 0; 1; 0; 0; 0; 0; 1; 1	2; 2; 1; 0; 1; 1; 1; 2; 1	2; 2; 1; 0; 1; 1; 1; 2; 1	2; 2; 1; 0; 1; 1; 1; 2; 1	1	By matching; By matching; By matching; By matching; By matching; By MS/MS; By MS/MS; By matching; By matching	12.7; 23.9; 12.7; 0; 12.7; 11.2; 12.7; 12.7; 9.7	14700; 19055; 4821.4; 0; 65090; 0; 55963; 49736; 9589.4	14913; 0; 0; 0; 0; 0; 0; 25972; 0	0; 0; 0; 0; 0; 1; 1; 0; 0
all4791	0.24101	1	false	truth	0.893642	0.251265	0.146227	0.00878213	0.754474	1.04865	10; 9; 11; 10; 7; 6; 10; 6; 8	10; 9; 11; 10; 7; 6; 10; 6; 8	10; 9; 11; 10; 7; 6; 10; 6; 8	9	By MS/MS; By MS/MS; By MS/MS; By MS/MS; By MS/MS; By MS/MS; By MS/MS; By MS/MS; By MS/MS	40.9; 31; 46.6; 30; 24.9; 38.7; 46.3; 31.6; 35.5	203410; 210460; 213260; 181080; 177190; 135610; 145210; 103010; 173060	121760; 109110; 110790; 164300; 111920; 91712; 76859; 109230; 113290	16; 6; 19; 24; 5; 1; 13; 11; 9	12; 8; 9; 7; 6; 9; 7; 9; 10	12; 8; 9; 7; 6; 9; 7; 9; 10	12; 8; 9; 7; 6; 9; 7; 9; 10	9	By MS/MS; By MS/MS; By MS/MS; By MS/MS; By MS/MS; By MS/MS; By MS/MS; By MS/MS; By MS/MS	54.3; 37.1; 35.8; 24; 35.8; 42.5; 31.9; 42.2; 48.6	226460; 141430; 153270; 119190; 238180; 329040; 209000; 229800; 259170	135270; 95706; 121900; 138790; 138500; 148320; 129340; 137140; 129990	10; 18; 11; 4; 5; 10; 11; 5; 12
all4792	0.63471	1	false	truth	0.874692	0.573893	0.44064	0.0726122	0.480515	1.40584	4; 2; 2; 4; 2; 4; 5; 5; 6	4; 2; 2; 4; 2; 4; 5; 5; 6	4; 2; 2; 4; 2; 4; 5; 5; 6	4	By MS/MS; By MS/MS; By MS/MS; By MS/MS; By MS/MS; By MS/MS; By MS/MS; By MS/MS; By MS/MS	21.5; 12.1; 9.1; 18.5; 12.1; 24.5; 32.8; 32.8; 27.9	2102.2; 9432.9; 31370; 37456; 17131; 54715; 22287; 313.82; 83108	0; 0; 43947; 46124; 0; 32620; 8179.5; 0; 25584	3; 1; 3; 3; 0; 0; 2; 1; 3	3; 3; 6; 5; 4; 4; 3; 3; 4	3; 3; 6; 5; 4; 4; 3; 3; 4	3; 3; 6; 5; 4; 4; 3; 3; 4	4	By MS/MS; By MS/MS; By MS/MS; By MS/MS; By MS/MS; By MS/MS; By MS/MS; By MS/MS; By MS/MS	14; 16.6; 29.4; 28.3; 20.4; 27.9; 16.6; 23.4; 27.9	50740; 3607.2; 28571; 51852; 72672; 62917; 98900; 60526; 20081	41328; 0; 21373; 24311; 43122; 62701; 51396; 0; 26546	0; 1; 0; 2; 1; 2; 2; 0; 1
all4802	0.491199	1	false	truth	1.16007	0.552207	0.440479	0.0826005	0.79293	1.73612	3; 2; 2; 2; 1; 3; 3; 2; 3	3; 2; 2; 2; 1; 3; 3; 2; 3	3; 2; 2; 2; 1; 3; 3; 2; 3	2	By MS/MS; By MS/MS; By MS/MS; By MS/MS; By MS/MS; By MS/MS; By MS/MS; By MS/MS; By MS/MS	52.8; 39.8; 39.8; 29.6; 16.7; 52.8; 52.8; 39.8; 52.8	17021; 23127; 9387.1; 0; 8415.5; 43949; 15636; 24247; 39519	16344; 13105; 8053.7; 0; 0; 14251; 9518.2; 19667; 9202	6; 4; 2; 2; 1; 4; 5; 4; 7	1; 1; 2; 3; 3; 3; 3; 1; 3	1; 1; 2; 3; 3; 3; 3; 1; 3	1; 1; 2; 3; 3; 3; 3; 1; 3	3	By matching; By matching; By MS/MS; By MS/MS; By MS/MS; By MS/MS; By MS/MS; By matching; By MS/MS	16.7; 16.7; 39.8; 52.8; 52.8; 52.8; 52.8; 16.7; 52.8	4084.1; 2201.8; 0; 15510; 25553; 24738; 38645; 20259; 13919	0; 0; 0; 11468; 13807; 14718; 10007; 0; 0	0; 0; 2; 5; 3; 5; 6; 0; 3
all4861	0.173133	1	false	truth	1.95236	1.15649	1.0498	0.0284008	0.942868	3.076	2; 2; 4; 7; 4; 1; 5; 4; 5	2; 2; 4; 7; 4; 1; 5; 4; 5	2; 2; 4; 7; 4; 1; 5; 4; 5	4	By MS/MS; By MS/MS; By MS/MS; By MS/MS; By MS/MS; By matching; By MS/MS; By MS/MS; By MS/MS	2; 3.7; 5.5; 10.1; 6; 1.6; 5.7; 7; 7.8	2434.8; 7422.5; 11998; 37810; 10747; 4617.1; 19181; 2975.7; 8852.3	0; 0; 26152; 12428; 0; 0; 14012; 0; 10308	1; 3; 4; 6; 3; 0; 2; 5; 4	4; 5; 3; 4; 1; 5; 5; 4; 7	4; 5; 3; 4; 1; 5; 5; 4; 7	4; 5; 3; 4; 1; 5; 5; 4; 7	4	By MS/MS; By MS/MS; By MS/MS; By MS/MS; By matching; By MS/MS; By MS/MS; By matching; By MS/MS	6; 6.5; 3.7; 6.6; 1.2; 7.5; 8.2; 4.5; 11.8	9708.9; 7937.3; 11034; 13247; 8812.7; 15810; 17264; 12013; 13594	8094.4; 0; 8654.5; 0; 0; 7824.7; 8082.2; 6499.2; 10091	2; 3; 1; 3; 0; 2; 3; 0; 5
all4869	0.945889	1	false	truth	1.01991	0.765893	0.515937	0.213387	0.652423	1.94076	4; 3; 3; 3; 3; 4; 2; 2; 2	4; 3; 3; 3; 3; 4; 2; 2; 2	4; 3; 3; 3; 3; 4; 2; 2; 2	3	By MS/MS; By MS/MS; By MS/MS; By MS/MS; By MS/MS; By MS/MS; By MS/MS; By MS/MS; By MS/MS	32.3; 23.4; 24; 23.4; 23.4; 32.3; 17.7; 17.7; 17.7	31999; 39517; 7571.4; 44263; 38067; 41200; 1897.9; 21151; 0	21562; 25578; 9521.6; 19623; 31337; 21488; 0; 22713; 0	5; 3; 2; 4; 4; 3; 5; 3; 4	1; 1; 4; 3; 3; 3; 3; 3; 4	1; 1; 4; 3; 3; 3; 3; 3; 4	1; 1; 4; 3; 3; 3; 3; 3; 4	3	By MS/MS; By MS/MS; By MS/MS; By MS/MS; By MS/MS; By MS/MS; By MS/MS; By matching; By MS/MS	8.9; 8.9; 32.3; 23.4; 24; 26; 24; 24; 35.9	10942; 9482.9; 7363.7; 26880; 19222; 33371; 29234; 19424; 45068	0; 0; 19373; 14787; 9955.8; 28559; 19727; 16495; 49416	3; 1; 4; 4; 2; 3; 5; 0; 4
all4874	0.809081	1	false	truth	1.0607	0.639751	0.45318	0.152378	0.723507	1.77926	4; 3; 1; 3; 3; 5; 4; 4; 5	4; 3; 1; 3; 3; 5; 4; 4; 5	4; 3; 1; 3; 3; 5; 4; 4; 5	4	By MS/MS; By MS/MS; By matching; By MS/MS; By MS/MS; By MS/MS; By MS/MS; By MS/MS; By MS/MS	29.8; 24; 5.8; 24; 24; 40; 34.7; 29.8; 44.9	33221; 23316; 3215.3; 25160; 40804; 57372; 73141; 73014; 63059	20805; 27560; 0; 24603; 27148; 19651; 44556; 38973; 38812	3; 5; 0; 7; 3; 1; 3; 5; 6	1; 1; 2; 4; 4; 3; 4; 4; 2	1; 1; 2; 4; 4; 3; 4; 4; 2	1; 1; 2; 4; 4; 3; 4; 4; 2	3	By MS/MS; By matching; By MS/MS; By MS/MS; By MS/MS; By MS/MS; By MS/MS; By matching; By MS/MS	13.8; 4.9; 10.2; 34.2; 39.1; 24; 26.2; 26.2; 11.1	8070.5; 2713.7; 6822.3; 92756; 49627; 31585; 44303; 50972; 30034	0; 0; 7357.9; 51554; 22642; 0; 40742; 17453; 46219	2; 0; 1; 6; 4; 4; 5; 0; 2
all4916	0.168972	1	false	truth	1.10982	0.158597	0.157878	0.00608808	0.958115	1.27513	2; 3; 1; 2; 3; 1; 3; 0; 2	2; 3; 1; 2; 3; 1; 3; 0; 2	2; 3; 1; 2; 3; 1; 3; 0; 2	2	By MS/MS; By MS/MS; By matching; By MS/MS; By MS/MS; By matching; By MS/MS; By matching; By MS/MS	6.2; 10.2; 3.9; 6.2; 10.2; 3.9; 8.5; 0; 7.3	9241.6; 10794; 4266.8; 12459; 9883.7; 8407.2; 19556; 0; 7195.2	7768.2; 8457.7; 0; 6700.9; 7079.4; 0; 10943; 0; 0	1; 2; 0; 1; 1; 0; 3; 0; 2	3; 1; 2; 1; 1; 1; 1; 0; 0	3; 1; 2; 1; 1; 1; 1; 0; 0	3; 1; 2; 1; 1; 1; 1; 0; 0	1	By matching; By MS/MS; By matching; By matching; By matching; By MS/MS; By matching; By matching; By matching	10.2; 2.3; 6.2; 3.9; 2.3; 2.3; 3.9; 0; 0	10364; 2437.1; 11018; 2224.9; 3233.8; 6359.7; 17507; 0; 0	6024.2; 0; 7050.6; 0; 0; 0; 0; 0; 0	0; 2; 0; 0; 0; 1; 0; 0; 0
all4936	0.0337479	1	false	truth	0.344647	0.202136	0.149567	0.168489	0.236212	0.592753	1; 2; 1; 2; 2; 2; 2; 3; 2	1; 2; 1; 2; 2; 2; 2; 2; 2	1; 2; 1; 2; 2; 2; 2; 2; 2	2	By matching; By MS/MS; By matching; By MS/MS; By matching; By matching; By MS/MS; By MS/MS; By MS/MS	1.7; 6.8; 3.4; 5.1; 6.4; 6.4; 5.1; 8.7; 6.8	1366; 3805.1; 338.43; 3983.1; 5104; 4760.1; 4637.2; 4717.6; 4073.4	0; 2832.8; 0; 4136.9; 0; 3829.4; 5311.4; 3930.3; 3534.4	0; 1; 0; 1; 0; 0; 2; 2; 4	2; 2; 2; 3; 4; 5; 4; 4; 2	2; 2; 2; 3; 4; 4; 4; 3; 2	2; 2; 2; 3; 4; 4; 4; 3; 2	3	By MS/MS; By MS/MS; By MS/MS; By MS/MS; By MS/MS; By MS/MS; By MS/MS; By MS/MS; By MS/MS	6.8; 5.1; 5.4; 8.5; 11.9; 13.3; 11.2; 10.4; 6.8	1604.4; 7140.6; 2950.8; 23134; 29938; 31246; 20243; 14563; 12898	0; 0; 0; 15503; 19486; 14534; 5148.9; 5087.9; 12026	2; 2; 2; 7; 4; 7; 6; 1; 5
all4968	0.0117604	1	false	truth	0.766711	0.195842	0.123808	0.0100193	0.649795	0.899145	3; 2; 4; 6; 2; 2; 5; 5; 3	3; 2; 4; 6; 2; 2; 5; 5; 3	3; 2; 4; 6; 2; 2; 5; 5; 3	3	By MS/MS; By MS/MS; By MS/MS; By MS/MS; By MS/MS; By MS/MS; By MS/MS; By MS/MS; By MS/MS	11.3; 7.8; 15.9; 22.4; 6.5; 8.3; 16.8; 18.5; 12.9	8268.9; 17080; 10912; 49044; 23954; 10875; 38325; 22881; 12452	12139; 18023; 15970; 15113; 15756; 20638; 16776; 19515; 24390	5; 1; 6; 5; 1; 1; 6; 4; 4	5; 6; 4; 4; 4; 4; 6; 3; 4	5; 6; 4; 4; 4; 4; 6; 3; 4	5; 6; 4; 4; 4; 4; 6; 3; 4	4	By MS/MS; By MS/MS; By MS/MS; By MS/MS; By MS/MS; By MS/MS; By MS/MS; By MS/MS; By MS/MS	17; 22; 15.9; 13.9; 16.3; 15.9; 25.5; 13.3; 15.5	27226; 23136; 24127; 68509; 5520.2; 51927; 36250; 6064.9; 29136	23102; 0; 20052; 31474; 0; 31294; 25296; 0; 18958	2; 6; 1; 4; 5; 7; 6; 1; 5
all4999	0.9001	1	false	truth	0.979892	0.390838	0.278108	0.0599263	0.748798	1.33591	3; 3; 3; 1; 2; 5; 5; 2; 0	3; 3; 3; 1; 2; 5; 5; 2; 0	3; 3; 3; 1; 2; 4; 4; 2; 0	3	By MS/MS; By MS/MS; By MS/MS; By matching; By matching; By MS/MS; By MS/MS; By MS/MS; By matching	10.4; 8.2; 8.5; 3.4; 4.9; 12.6; 12.2; 7.4; 0	15016; 18520; 13664; 2697.1; 6965.3; 29205; 22070; 5695.4; 0	16915; 19252; 20198; 0; 0; 16423; 15662; 0; 0	4; 4; 3; 0; 0; 0; 2; 2; 0	4; 2; 6; 5; 3; 4; 2; 2; 5	4; 2; 6; 5; 3; 4; 2; 2; 5	4; 2; 6; 5; 3; 3; 2; 2; 4	3	By MS/MS; By MS/MS; By MS/MS; By MS/MS; By MS/MS; By MS/MS; By MS/MS; By matching; By MS/MS	10.1; 6.7; 19.6; 13.9; 8.9; 10.4; 3.4; 7.7; 14.6	29937; 17720; 34540; 33209; 11466; 39016; 1194.7; 14135; 20318	20856; 18617; 15750; 14183; 26260; 16957; 0; 0; 11648	5; 3; 3; 2; 2; 3; 1; 0; 1
all5012	0.165462	1	false	truth	0.693321	0.379574	0.296188	0.0946628	0.446198	1.08543	4; 2; 3; 0; 1; 2; 2; 3; 3	4; 2; 3; 0; 1; 2; 2; 3; 3	4; 2; 3; 0; 1; 2; 2; 3; 3	2	By MS/MS; By MS/MS; By matching; By matching; By matching; By MS/MS; By matching; By MS/MS; By MS/MS	12.8; 5.8; 10.4; 0; 4.5; 5.6; 7.1; 10.6; 9.5	17379; 13406; 13626; 0; 10851; 12633; 8766.4; 9414.8; 16673	28400; 19044; 10813; 0; 0; 0; 14913; 0; 17854	4; 1; 0; 0; 0; 0; 0; 1; 1	2; 1; 3; 1; 3; 7; 5; 2; 3	2; 1; 3; 1; 3; 7; 5; 2; 3	2; 1; 3; 1; 3; 7; 5; 2; 3	3	By matching; By MS/MS; By MS/MS; By matching; By MS/MS; By MS/MS; By MS/MS; By matching; By matching	4.1; 4.5; 10; 1.9; 10.8; 22.3; 16.5; 8; 9.3	4252; 5765.9; 12345; 1534.4; 27665; 204880; 81914; 61386; 53569	0; 0; 12105; 0; 27233; 33105; 46968; 29092; 12268	0; 0; 1; 0; 3; 3; 3; 0; 0
all5018	0.66812	1	false	truth	1.13339	0.652078	0.609833	0.259412	0.718126	2.34266	1; 1; 2; 2; 1; 4; 2; 2; 2	1; 1; 2; 2; 1; 4; 2; 2; 2	1; 1; 2; 2; 1; 4; 2; 2; 2	2	By MS/MS; By MS/MS; By MS/MS; By MS/MS; By MS/MS; By MS/MS; By MS/MS; By MS/MS; By MS/MS	14; 14; 21.3; 21.3; 14; 36; 14; 14; 14	8168.2; 8606.3; 11437; 5592.7; 17524; 41139; 33142; 37433; 32142	0; 0; 9898.7; 0; 0; 17597; 19366; 18781; 17423	4; 5; 2; 6; 4; 2; 3; 3; 2	2; 0; 1; 1; 1; 4; 2; 2; 2	2; 0; 1; 1; 1; 4; 2; 2; 2	2; 0; 1; 1; 1; 4; 2; 2; 2	2	By MS/MS; By matching; By MS/MS; By MS/MS; By MS/MS; By MS/MS; By MS/MS; By matching; By MS/MS	21.3; 0; 14; 14; 14; 36.8; 29.4; 29.4; 14	8042.8; 0; 5239.1; 26730; 24387; 66415; 0; 14212; 23029	10407; 0; 0; 0; 0; 28452; 0; 7177.2; 13721	2; 0; 2; 2; 2; 3; 3; 0; 2
all5026	0.0830877	1	false	truth	0.602153	0.422352	0.54404	0.121664	0.0991021	1.27202	1; 2; 1; 2; 3; 1; 5; 5; 2	1; 2; 1; 2; 3; 1; 5; 5; 2	1; 2; 1; 2; 3; 1; 5; 5; 2	2	By matching; By matching; By matching; By MS/MS; By MS/MS; By matching; By MS/MS; By MS/MS; By MS/MS	3.2; 5.9; 2.6; 5.5; 8.3; 2.2; 13.8; 15.8; 5.9	41079; 45701; 5182.2; 30813; 24215; 11348; 7610.2; 29409; 5802.9	0; 0; 0; 0; 0; 0; 7041.3; 14253; 0	0; 0; 0; 2; 1; 0; 5; 6; 2	2; 2; 1; 2; 3; 6; 4; 4; 1	2; 2; 1; 2; 3; 6; 4; 4; 1	2; 2; 1; 2; 3; 6; 4; 4; 1	2	By matching; By matching; By matching; By MS/MS; By MS/MS; By MS/MS; By MS/MS; By MS/MS; By MS/MS	6.7; 5.9; 3.2; 7.7; 10.3; 16.6; 10.5; 10.5; 2.2	31820; 25367; 26373; 30739; 35317; 63189; 23765; 25914; 8944.5	19277; 0; 0; 0; 22297; 23332; 10687; 12129; 0	0; 0; 0; 2; 1; 5; 3; 1; 2
all5039	0.0166258	1	false	truth	1.32348	0.423068	0.246209	0.0213396	1.10179	1.60288	19; 22; 20; 20; 18; 21; 18; 16; 19	19; 22; 20; 20; 18; 21; 18; 16; 19	19; 22; 20; 20; 18; 21; 18; 16; 19	19	By MS/MS; By MS/MS; By MS/MS; By MS/MS; By MS/MS; By MS/MS; By MS/MS; By MS/MS; By MS/MS	64.3; 64.3; 62.2; 64.1; 55.8; 66.6; 60.4; 56.2; 66.2	652730; 766740; 719640; 1085900; 1052500; 1563600; 1073600; 1169400; 1236000	521690; 533570; 477940; 717480; 675090; 600600; 727180; 835820; 796480	42; 37; 46; 64; 35; 26; 47; 44; 58	19; 18; 19; 19; 15; 17; 20; 18; 19	19; 18; 19; 19; 15; 17; 20; 18; 19	19; 18; 19; 19; 15; 17; 20; 18; 19	19	By MS/MS; By MS/MS; By MS/MS; By MS/MS; By MS/MS; By MS/MS; By MS/MS; By MS/MS; By MS/MS	61.8; 58.9; 58.9; 67.6; 52.1; 62.9; 61.4; 61; 64.3	533340; 412650; 450920; 904120; 903600; 890780; 1257400; 1239800; 1163300	414570; 464420; 301300; 506230; 504390; 478450; 631490; 739900; 584890	26; 24; 29; 37; 28; 40; 48; 20; 31
all5047	0.268796	1	false	truth	0.542617	0.642448	0.506956	0.346124	0.140247	1.51945	2; 1; 1; 3; 1; 2; 0; 2; 1	2; 1; 1; 3; 1; 2; 0; 2; 1	2; 1; 1; 3; 1; 2; 0; 2; 1	1	By matching; By MS/MS; By MS/MS; By MS/MS; By matching; By MS/MS; By matching; By matching; By MS/MS	14.7; 7.8; 7.8; 22.6; 7.8; 14.7; 0; 14.7; 7.8	4717.3; 15400; 6696.8; 492010; 9359.3; 15860; 0; 7063.2; 1061700	14831; 73871; 0; 72190; 0; 9631.2; 0; 12344; 0	0; 4; 1; 3; 0; 1; 0; 0; 1	2; 3; 1; 3; 3; 2; 2; 1; 2	2; 3; 1; 3; 3; 2; 2; 1; 2	2; 3; 1; 3; 3; 2; 2; 1; 2	2	By matching; By MS/MS; By MS/MS; By MS/MS; By MS/MS; By MS/MS; By MS/MS; By matching; By MS/MS	15.7; 22.6; 7.8; 22.6; 22.6; 14.7; 14.7; 7.8; 14.7	26303; 7112.6; 4219.8; 158320; 186730; 70108; 8506.2; 2622.3; 8098.8	0; 25631; 0; 95766; 117580; 144400; 18861; 0; 25235	0; 3; 2; 12; 11; 8; 2; 0; 1
all5057	0.104404	1	false	truth	0.554532	0.310827	0.273484	0.11054	0.32539	0.921505	2; 2; 2; 3; 1; 3; 3; 4; 3	2; 2; 2; 3; 1; 3; 3; 4; 3	2; 2; 2; 3; 1; 3; 3; 4; 3	3	By MS/MS; By MS/MS; By matching; By MS/MS; By matching; By MS/MS; By MS/MS; By MS/MS; By MS/MS	13.2; 12.6; 13.2; 20.9; 4.9; 22.5; 22; 30.2; 20.9	11802; 6696; 5455.4; 3530; 10584; 37574; 6885.1; 7728.6; 29430	9131.9; 0; 9130.9; 0; 0; 7787.8; 20629; 21964; 9179.4	2; 1; 0; 1; 0; 1; 3; 3; 9	2; 2; 3; 2; 2; 4; 2; 1; 2	2; 2; 3; 2; 2; 4; 2; 1; 2	2; 2; 3; 2; 2; 4; 2; 1; 2	2	By MS/MS; By MS/MS; By MS/MS; By MS/MS; By MS/MS; By MS/MS; By MS/MS; By MS/MS; By MS/MS	12.6; 12.6; 17.6; 13.2; 13.2; 26.4; 12.6; 7.7; 12.6	15643; 4731.8; 16129; 8707.7; 82183; 27481; 25272; 0; 24433	0; 0; 18443; 0; 29131; 21330; 0; 0; 0	2; 0; 2; 1; 1; 1; 2; 0; 2
all5062	0.628865	1	false	truth	1.09186	0.587684	0.342009	0.057708	0.800109	1.51734	8; 6; 7; 8; 7; 9; 8; 8; 6	8; 6; 7; 8; 7; 9; 8; 8; 6	7; 5; 6; 7; 7; 8; 7; 7; 5	7	By MS/MS; By MS/MS; By MS/MS; By MS/MS; By MS/MS; By MS/MS; By MS/MS; By MS/MS; By MS/MS	29.1; 26.1; 31.2; 31.2; 28.2; 33.5; 29.1; 30; 24.3	261270; 210470; 216190; 348430; 335670; 605740; 377970; 323720; 378240	145060; 153620; 122050; 134530; 180190; 307310; 213290; 237260; 201690	18; 7; 16; 26; 19; 5; 15; 15; 14	6; 6; 8; 8; 5; 6; 6; 7; 5	6; 6; 8; 8; 5; 6; 6; 7; 5	6; 5; 7; 7; 4; 5; 5; 6; 4	5	By MS/MS; By MS/MS; By MS/MS; By MS/MS; By MS/MS; By MS/MS; By MS/MS; By MS/MS; By MS/MS	25.8; 24.3; 29.4; 31.2; 21.1; 26.7; 26.7; 31.2; 21.1	174350; 184790; 287340; 254930; 463270; 526590; 368950; 343970; 330460	114770; 133420; 165310; 94825; 276380; 269610; 206230; 120770; 211650	11; 9; 7; 8; 6; 12; 15; 4; 10
all5089	0.0561481	1	false	truth	0.691643	0.323783	0.192667	0.0527122	0.528468	0.931791	6; 3; 6; 4; 5; 3; 5; 7; 4	6; 3; 6; 4; 5; 3; 5; 7; 4	6; 3; 6; 4; 5; 3; 5; 7; 4	5	By MS/MS; By MS/MS; By MS/MS; By MS/MS; By MS/MS; By matching; By MS/MS; By MS/MS; By MS/MS	16.7; 10.5; 17.8; 13.2; 13.6; 8.6; 16.5; 21.5; 13.6	15260; 21515; 24783; 20064; 39800; 29185; 13667; 51980; 0	21032; 15726; 16429; 24416; 21208; 19094; 16125; 28624; 0	4; 1; 3; 4; 2; 0; 3; 4; 4	3; 5; 10; 7; 9; 8; 7; 7; 5	3; 5; 10; 7; 9; 8; 7; 7; 5	3; 5; 10; 7; 9; 8; 7; 7; 5	7	By matching; By MS/MS; By MS/MS; By MS/MS; By MS/MS; By MS/MS; By MS/MS; By MS/MS; By MS/MS	9.6; 15.1; 33.7; 27.6; 28.7; 28; 24.5; 22.4; 19	58653; 13443; 211820; 68511; 90827; 119720; 80721; 103650; 22440	22025; 13932; 46332; 36606; 40317; 43276; 34917; 30364; 13836	0; 2; 5; 4; 4; 8; 6; 2; 4
all5091	0.680726	1	false	truth	1.09787	0.734292	0.42733	0.0798454	0.737577	1.64869	6; 5; 5; 8; 5; 5; 6; 6; 5	6; 5; 5; 8; 5; 5; 6; 6; 5	6; 5; 5; 8; 5; 5; 6; 6; 5	5	By MS/MS; By MS/MS; By MS/MS; By MS/MS; By MS/MS; By MS/MS; By MS/MS; By MS/MS; By MS/MS	31.4; 26.4; 24.5; 40.3; 29.2; 28.9; 30.2; 34.9; 25.2	19307; 20826; 39435; 82835; 15316; 52652; 46374; 35801; 28737	10707; 30078; 33950; 44608; 22199; 64375; 35020; 37137; 36514	5; 3; 3; 15; 11; 5; 10; 9; 9	7; 5; 4; 8; 3; 6; 5; 4; 7	7; 5; 4; 8; 3; 6; 5; 4; 7	7; 5; 4; 8; 3; 6; 5; 4; 7	5	By MS/MS; By MS/MS; By MS/MS; By MS/MS; By MS/MS; By MS/MS; By MS/MS; By MS/MS; By MS/MS	33; 26.4; 22; 43.1; 17.3; 35.8; 23.6; 20.4; 39.9	33053; 22199; 19772; 60417; 27697; 88089; 92387; 54790; 61291	16419; 6728.9; 20730; 31110; 33462; 58664; 49957; 42856; 46607	2; 0; 3; 6; 2; 6; 6; 2; 7
all5218	0.0168588	1	false	truth	0.678298	0.288095	0.174482	0.0250354	0.518152	0.87328	3; 5; 6; 3; 4; 9; 7; 6; 7	3; 5; 6; 3; 4; 9; 7; 6; 7	3; 5; 6; 3; 4; 9; 7; 6; 7	6	By MS/MS; By MS/MS; By MS/MS; By MS/MS; By MS/MS; By MS/MS; By MS/MS; By MS/MS; By MS/MS	11.4; 21.3; 19.5; 13.5; 15.5; 33.4; 27.1; 22.9; 25.6	19204; 61987; 41822; 15324; 33056; 82342; 21255; 21056; 30638	24687; 13584; 25840; 17941; 31061; 25510; 15574; 0; 26950	4; 1; 3; 1; 2; 2; 6; 6; 6	4; 6; 4; 5; 8; 9; 6; 4; 7	4; 6; 4; 5; 8; 9; 6; 4; 7	4; 6; 4; 5; 8; 9; 6; 4; 7	6	By matching; By matching; By MS/MS; By MS/MS; By MS/MS; By MS/MS; By MS/MS; By MS/MS; By MS/MS	12.1; 23.8; 13; 15.9; 34.5; 36.3; 22.4; 16.8; 25.3	23515; 33013; 92144; 67093; 67330; 92688; 40956; 61820; 79641	22656; 19233; 47096; 45066; 37853; 42806; 29444; 41477; 33153	0; 0; 2; 3; 4; 7; 4; 2; 6
all5219	0.674329	1	false	truth	0.942535	0.379159	0.228408	0.0275175	0.736058	1.20235	5; 6; 5; 2; 4; 3; 2; 5; 3	5; 6; 5; 2; 4; 3; 2; 5; 3	5; 6; 5; 2; 4; 3; 2; 5; 3	4	By MS/MS; By MS/MS; By MS/MS; By MS/MS; By MS/MS; By MS/MS; By MS/MS; By MS/MS; By MS/MS	16.1; 21.6; 16.5; 7.8; 14.1; 11.2; 6.7; 21; 11.4	51033; 34120; 9486.2; 13155; 17489; 28328; 19616; 35206; 19460	20918; 18054; 8467.5; 0; 10454; 15629; 17759; 11328; 22155	7; 5; 4; 7; 7; 2; 2; 4; 6	4; 5; 3; 6; 3; 6; 4; 4; 7	4; 5; 3; 6; 3; 6; 4; 4; 7	4; 5; 3; 6; 3; 6; 4; 4; 7	4	By MS/MS; By MS/MS; By matching; By MS/MS; By MS/MS; By MS/MS; By MS/MS; By matching; By MS/MS	12.7; 16.5; 10; 21.4; 11.2; 19; 14.7; 12.9; 24.9	27358; 34823; 45265; 59834; 34188; 61365; 31102; 20610; 27280	11488; 24716; 14278; 22620; 19715; 18477; 13912; 14156; 13453	2; 2; 0; 7; 1; 2; 2; 0; 5
all5250	0.189947	1	false	truth	0.761972	0.383974	0.273918	0.0436182	0.514482	1.07897	2; 3; 3; 2; 3; 3; 3; 2; 2	2; 3; 3; 2; 3; 3; 3; 2; 2	2; 3; 3; 2; 3; 3; 3; 2; 2	3	By MS/MS; By MS/MS; By MS/MS; By MS/MS; By MS/MS; By matching; By MS/MS; By MS/MS; By matching	6.4; 11.9; 8.3; 5.8; 8.3; 11.9; 7.8; 7.8; 10	16890; 16469; 14804; 7182.1; 2597.3; 27374; 9476.3; 5541.6; 12315	12655; 8715.6; 11364; 5359; 4283.1; 10922; 0; 0; 0	2; 3; 3; 2; 2; 0; 2; 1; 0	0; 3; 2; 2; 3; 3; 2; 3; 3	0; 3; 2; 2; 3; 3; 2; 3; 3	0; 3; 2; 2; 3; 3; 2; 3; 3	3	By matching; By MS/MS; By MS/MS; By MS/MS; By MS/MS; By MS/MS; By matching; By matching; By MS/MS	0; 8.3; 5.8; 5.8; 13.3; 8.9; 5.5; 6.9; 8.9	0; 11209; 11519; 25033; 35904; 24603; 9870.4; 25035; 19319	0; 11123; 9797; 8202.7; 12421; 17221; 0; 17628; 9773.9	0; 3; 1; 1; 1; 2; 0; 0; 1
all5263	0.693016	1	false	truth	0.806139	0.655772	0.807139	0.714899	0.303436	5.35168	5; 5; 4; 1; 3; 2; 2; 5; 3	5; 5; 4; 1; 3; 2; 2; 5; 3	5; 5; 4; 1; 3; 2; 2; 5; 3	3	By MS/MS; By MS/MS; By MS/MS; By matching; By matching; By MS/MS; By MS/MS; By MS/MS; By MS/MS	15.4; 19; 14.4; 3.6; 10.5; 8.2; 7.7; 17.2; 11	37975; 47146; 100520; 65659; 55894; 38990; 140550; 29203; 5186.8	0; 39019; 0; 0; 27916; 0; 0; 0; 13820	3; 1; 4; 0; 0; 0; 1; 3; 2	1; 1; 1; 2; 4; 3; 4; 2; 2	1; 1; 1; 2; 4; 3; 4; 2; 2	1; 1; 1; 2; 4; 3; 4; 2; 2	2	By matching; By matching; By MS/MS; By MS/MS; By MS/MS; By MS/MS; By MS/MS; By matching; By MS/MS	3.6; 3.6; 4.4; 5.9; 13.6; 9.7; 12.1; 5.9; 8.2	49086; 27834; 0; 86077; 218410; 99758; 21506; 36288; 50059	0; 0; 0; 0; 0; 45555; 8676.5; 0; 45983	0; 0; 1; 1; 1; 3; 2; 0; 1
all5305	0.144172	1	false	truth	0.717781	0.311578	0.284164	0.0494304	0.461267	1.04895	2; 1; 1; 2; 1; 1; 3; 4; 4	2; 1; 1; 2; 1; 1; 3; 4; 4	2; 1; 1; 2; 1; 1; 3; 4; 4	2	By MS/MS; By MS/MS; By MS/MS; By MS/MS; By matching; By matching; By MS/MS; By MS/MS; By MS/MS	9.3; 5.8; 5.8; 12; 6.2; 3.4; 16.8; 22.3; 17.9	6414.4; 4193.2; 4016; 3479; 6087.7; 3109.1; 5718.1; 6325.7; 4934.1	7689.9; 6802.3; 5228.7; 0; 0; 0; 3368.4; 0; 0	7; 3; 4; 1; 0; 0; 3; 2; 4	2; 2; 2; 1; 2; 2; 6; 1; 1	2; 2; 2; 1; 2; 2; 6; 1; 1	2; 2; 2; 1; 2; 2; 6; 1; 1	2	By MS/MS; By MS/MS; By MS/MS; By MS/MS; By matching; By MS/MS; By MS/MS; By matching; By matching	11.3; 11.3; 11.3; 5.8; 10.7; 9.3; 36.1; 4.8; 5.5	7529; 5356.2; 5798.7; 5499.9; 5893.3; 21250; 14813; 8422.6; 127.36	8557.2; 6535.5; 4885.3; 0; 0; 11248; 8831; 0; 0	3; 4; 2; 1; 0; 4; 6; 0; 0
all5339	0.723185	1	false	false	1.05459	0.232105	#N/A	#N/A	#N/A	#N/A	2; 2; 0; 0; 1; 2; 3; 1; 1	2; 2; 0; 0; 1; 2; 3; 1; 1	2; 2; 0; 0; 1; 2; 3; 1; 1	1	By MS/MS; By matching; By matching; By matching; By matching; By matching; By MS/MS; By matching; By MS/MS	12.1; 14.6; 0; 0; 8; 12.1; 20.1; 5.5; 6.5	4501.2; 7246.1; 0; 0; 4541.5; 16437; 12300; 5233; 0	0; 6580.2; 0; 0; 0; 7806.7; 10686; 0; 0	1; 0; 0; 0; 0; 0; 2; 0; 2	1; 2; 0; 1; 0; 0; 0; 1; 0	1; 2; 0; 1; 0; 0; 0; 1; 0	1; 2; 0; 1; 0; 0; 0; 1; 0	0	By matching; By matching; By matching; By MS/MS; By matching; By matching; By matching; By matching; By matching	8; 14.6; 0; 6.5; 0; 0; 0; 5.5; 0	4641.1; 8341.2; 0; 0; 0; 0; 0; 4111.4; 0	0; 7045.9; 0; 0; 0; 0; 0; 0; 0	0; 0; 0; 2; 0; 0; 0; 0; 0
all7151	0.506476	1	false	truth	1.13337	0.650972	0.37884	0.105839	0.845024	1.69002	5; 5; 4; 6; 5; 6; 5; 4; 6	5; 5; 4; 6; 5; 6; 5; 4; 6	5; 5; 4; 6; 5; 6; 5; 4; 6	5	By MS/MS; By MS/MS; By MS/MS; By MS/MS; By MS/MS; By MS/MS; By MS/MS; By MS/MS; By MS/MS	30.7; 25.8; 36.2; 39.9; 36.2; 39.9; 25.8; 25.8; 39.9	87446; 94561; 89971; 128700; 92741; 158790; 121520; 89235; 80355	66351; 65594; 70410; 56586; 50717; 70938; 67994; 64692; 61351	4; 9; 8; 16; 13; 2; 9; 6; 14	5; 3; 3; 5; 5; 5; 6; 4; 6	5; 3; 3; 5; 5; 5; 6; 4; 6	5; 3; 3; 5; 5; 5; 6; 4; 6	5	By MS/MS; By MS/MS; By MS/MS; By MS/MS; By MS/MS; By MS/MS; By MS/MS; By MS/MS; By MS/MS	39.3; 22.1; 27; 25.8; 39.9; 25.8; 39.9; 25.8; 39.9	31021; 9233.8; 19150; 189470; 158250; 165270; 126810; 121460; 85173	25794; 18647; 26062; 79388; 115610; 80572; 82301; 62285; 49729	3; 4; 6; 6; 6; 7; 9; 3; 4
all7155	0.0217213	1	false	false	0.347278	0.257048	0.371619	0.0998705	0	0.779392	1; 0; 1; 3; 2; 1; 1; 1; 2	1; 0; 1; 3; 2; 1; 1; 1; 2	1; 0; 1; 3; 2; 1; 1; 1; 2	1	By MS/MS; By matching; By MS/MS; By MS/MS; By matching; By MS/MS; By MS/MS; By MS/MS; By MS/MS	11.7; 0; 11.7; 33.3; 24.3; 12.6; 12.6; 12.6; 24.3	10881; 0; 10445; 12064; 6083.8; 0; 8855.2; 8404.6; 1957.2	0; 0; 0; 8046.3; 2659.6; 0; 0; 0; 0	3; 0; 2; 4; 0; 1; 1; 1; 2	2; 2; 1; 1; 2; 1; 2; 0; 1	2; 2; 1; 1; 2; 1; 2; 0; 1	2; 2; 1; 1; 2; 1; 2; 0; 1	1	By MS/MS; By MS/MS; By MS/MS; By MS/MS; By MS/MS; By MS/MS; By MS/MS; By matching; By MS/MS	24.3; 24.3; 11.7; 11.7; 24.3; 11.7; 24.3; 0; 12.6	16266; 22185; 7653.7; 17534; 29971; 15896; 21520; 0; 7443.3	10939; 21006; 0; 0; 14580; 0; 15125; 0; 0	2; 4; 2; 2; 1; 1; 3; 0; 1
all7185	0.890751	1	false	truth	1.038	0.618105	0.499787	0.143764	0.644744	1.77982	4; 5; 3; 6; 2; 2; 4; 4; 1	4; 5; 3; 6; 2; 2; 4; 4; 1	4; 5; 3; 6; 2; 2; 4; 4; 1	4	By MS/MS; By MS/MS; By MS/MS; By MS/MS; By MS/MS; By matching; By MS/MS; By MS/MS; By MS/MS	13; 18; 9.6; 21.4; 8.3; 7.6; 14.6; 13.8; 3	27095; 19282; 9127.4; 31145; 10776; 6073.7; 15564; 15063; 8454.2	18388; 11316; 0; 15800; 11300; 3147.5; 10273; 9512; 0	6; 1; 5; 5; 4; 0; 3; 4; 1	4; 2; 1; 3; 2; 1; 3; 2; 2	4; 2; 1; 3; 2; 1; 3; 2; 2	4; 2; 1; 3; 2; 1; 3; 2; 2	2	By MS/MS; By MS/MS; By matching; By MS/MS; By MS/MS; By MS/MS; By MS/MS; By matching; By MS/MS	13; 6.2; 3; 9.6; 6.2; 3; 9.6; 6.4; 6.4	11362; 14146; 3808.1; 10699; 25205; 10773; 14784; 6258.7; 2331.6	6799.6; 10579; 0; 0; 15770; 0; 8839.9; 0; 0	1; 2; 0; 3; 1; 1; 3; 0; 1
all7262	0.219947	1	false	truth	0.70638	0.445385	0.328055	0.113774	0.436982	1.15715	3; 2; 3; 3; 2; 3; 2; 1; 2	3; 2; 3; 3; 2; 3; 2; 1; 2	3; 2; 3; 3; 2; 3; 2; 1; 2	2	By MS/MS; By MS/MS; By MS/MS; By MS/MS; By MS/MS; By MS/MS; By MS/MS; By MS/MS; By MS/MS	36.1; 26.3; 36.1; 36.1; 27.1; 36.1; 27.1; 17.3; 27.1	33079; 43059; 91387; 30353; 2665.3; 41893; 5433.2; 0; 2094	33516; 32268; 37191; 15003; 0; 16681; 0; 0; 0	3; 4; 5; 8; 2; 2; 8; 2; 6	3; 3; 2; 3; 2; 2; 3; 3; 3	3; 3; 2; 3; 2; 2; 3; 3; 3	3; 3; 2; 3; 2; 2; 3; 3; 3	3	By MS/MS; By MS/MS; By MS/MS; By MS/MS; By MS/MS; By MS/MS; By MS/MS; By MS/MS; By MS/MS	36.1; 36.1; 26.3; 36.1; 27.1; 27.1; 36.1; 36.1; 36.1	26144; 3070.2; 38387; 97348; 106520; 54305; 66194; 36764; 113570	39208; 0; 0; 32053; 49913; 32904; 23682; 30835; 66780	4; 6; 4; 6; 2; 6; 6; 1; 4
all7362; alr8011	0.975347	1	false	truth	0.992401	0.449634	#N/A	0.284225	#N/A	#N/A	3; 3; 2; 2; 0; 2; 1; 1; 1	3; 3; 2; 2; 0; 2; 1; 1; 1	3; 3; 2; 2; 0; 2; 1; 1; 1	2	By matching; By MS/MS; By MS/MS; By matching; By matching; By matching; By matching; By MS/MS; By MS/MS	16.1; 24.1; 10.9; 10.9; 0; 10.9; 7.3; 7.3; 3.6	10800; 8524.2; 8053; 3523.1; 0; 6214.2; 4815.3; 0; 3847.8	0; 0; 9684.1; 0; 0; 0; 0; 0; 0	0; 1; 1; 0; 0; 0; 0; 1; 1	3; 3; 3; 4; 2; 2; 2; 2; 4	3; 3; 3; 4; 2; 2; 2; 2; 4	3; 3; 3; 4; 2; 2; 2; 2; 4	3	By MS/MS; By MS/MS; By MS/MS; By MS/MS; By MS/MS; By MS/MS; By MS/MS; By MS/MS; By MS/MS	16.1; 23; 16.1; 26.6; 15.7; 17.9; 12.4; 12.4; 26.6	8427.1; 23844; 16435; 20191; 4241.3; 8709.9; 0; 17996; 20278	0; 16805; 0; 9708.1; 0; 0; 0; 9593; 8772.2	2; 4; 4; 3; 1; 3; 3; 1; 5
all7372	0.355445	1	false	truth	1.64521	1.7024	1.68741	0.822806	0.65738	17.9123	2; 2; 2; 3; 2; 2; 1; 0; 2	2; 2; 2; 3; 2; 2; 1; 0; 2	2; 2; 2; 3; 2; 2; 1; 0; 2	2	By MS/MS; By MS/MS; By MS/MS; By MS/MS; By MS/MS; By MS/MS; By MS/MS; By matching; By matching	17.4; 7.7; 7.7; 18.7; 21.9; 7.7; 7.1; 0; 17.4	76578; 69862; 6061.4; 69469; 50629; 61986; 10742; 0; 10306	69556; 21566; 0; 46775; 37067; 17455; 0; 0; 13339	3; 1; 1; 4; 1; 1; 1; 0; 0	4; 3; 2; 2; 1; 1; 1; 2; 1	4; 3; 2; 2; 1; 1; 1; 2; 1	4; 3; 2; 2; 1; 1; 1; 2; 1	2	By MS/MS; By MS/MS; By MS/MS; By MS/MS; By MS/MS; By matching; By matching; By matching; By MS/MS	32.9; 22.6; 22.6; 25.2; 14.8; 7.1; 7.1; 7.7; 7.1	66314; 13062; 11747; 4487.9; 0; 13329; 12011; 12991; 15845	36287; 11688; 0; 0; 0; 0; 0; 9959; 0	2; 2; 1; 2; 2; 0; 0; 0; 1
all7597	0.24077	1	false	truth	1.25861	0.751339	0.442911	0.104466	0.914905	1.89594	4; 3; 2; 3; 3; 3; 4; 4; 4	4; 3; 2; 3; 3; 3; 4; 4; 4	4; 3; 2; 3; 3; 3; 4; 4; 4	3	By MS/MS; By MS/MS; By MS/MS; By MS/MS; By MS/MS; By MS/MS; By MS/MS; By MS/MS; By MS/MS	36.9; 27.4; 21; 27.4; 31.8; 31.8; 35.7; 36.9; 35.7	26748; 10810; 0; 74498; 64593; 147600; 160610; 79794; 150190	72612; 41795; 0; 55292; 41544; 47519; 79451; 59961; 75337	1; 0; 2; 2; 2; 3; 8; 6; 7	3; 3; 2; 2; 2; 4; 2; 3; 2	3; 3; 2; 2; 2; 4; 2; 3; 2	3; 3; 2; 2; 2; 4; 2; 3; 2	2	By MS/MS; By MS/MS; By MS/MS; By MS/MS; By MS/MS; By MS/MS; By MS/MS; By MS/MS; By MS/MS	31.8; 31.8; 22.3; 22.3; 22.3; 35.7; 22.3; 27.4; 22.3	23884; 34160; 31370; 276980; 156700; 190340; 101740; 74910; 78047	29830; 20610; 27448; 134600; 80193; 47896; 47602; 31013; 37763	1; 1; 1; 5; 5; 6; 5; 2; 3
all7598	0.0586624	1	false	truth	1.87847	1.71171	1.10001	0.255174	1.09418	3.94986	5; 3; 3; 5; 4; 3; 3; 3; 4	5; 3; 3; 5; 4; 3; 3; 3; 4	5; 3; 3; 5; 4; 3; 3; 3; 4	3	By MS/MS; By MS/MS; By MS/MS; By MS/MS; By MS/MS; By MS/MS; By MS/MS; By MS/MS; By MS/MS	42.7; 22.8; 22.8; 42.7; 29.8; 24; 22.8; 22.8; 35.7	93398; 90132; 67593; 116280; 74224; 85112; 16807; 57362; 19080	84559; 77231; 51448; 81256; 77618; 63576; 23413; 32702; 9159.4	7; 6; 5; 7; 6; 5; 5; 4; 8	3; 3; 4; 3; 3; 3; 3; 4; 3	3; 3; 4; 3; 3; 3; 3; 4; 3	3; 3; 4; 3; 3; 3; 3; 4; 3	3	By MS/MS; By MS/MS; By MS/MS; By MS/MS; By MS/MS; By MS/MS; By MS/MS; By MS/MS; By MS/MS	22.8; 22.8; 29.8; 22.8; 21.6; 22.8; 21.6; 35.7; 22.8	19841; 73024; 55873; 3744.2; 63907; 45626; 11987; 45879; 14202	5600.3; 63537; 53985; 0; 22675; 21095; 18816; 21949; 0	4; 5; 4; 3; 2; 4; 1; 1; 3
all7607	0.212465	1	false	truth	1.78862	1.84156	1.21871	0.173379	0.771825	3.55572	3; 1; 2; 2; 3; 3; 1; 3; 2	3; 1; 2; 2; 3; 3; 1; 3; 2	3; 1; 2; 2; 3; 3; 1; 3; 2	2	By MS/MS; By MS/MS; By MS/MS; By MS/MS; By MS/MS; By MS/MS; By MS/MS; By MS/MS; By MS/MS	29.2; 9.9; 16.8; 16.8; 29.2; 29.2; 9.9; 29.2; 22.4	27720; 25993; 34571; 13806; 26389; 9395.7; 5497.5; 4993.5; 14823	44986; 13680; 39501; 7711.5; 14671; 7922.5; 0; 5811.8; 10807	3; 2; 6; 3; 1; 0; 1; 2; 4	2; 2; 2; 1; 2; 2; 2; 0; 1	2; 2; 2; 1; 2; 2; 2; 0; 1	2; 2; 2; 1; 2; 2; 2; 0; 1	2	By MS/MS; By MS/MS; By MS/MS; By MS/MS; By MS/MS; By MS/MS; By MS/MS; By matching; By MS/MS	16.8; 16.8; 16.8; 9.9; 16.8; 22.4; 22.4; 0; 9.9	6017; 8449; 11366; 5571.3; 11029; 8051.3; 23542; 0; 18750	9328.4; 6069.2; 17628; 0; 1245.9; 0; 17241; 0; 10602	3; 3; 3; 2; 1; 0; 4; 0; 2
all7611	0.264415	1	false	truth	3.58944	5.80134	3.96534	0.118073	0	8.3197	3; 3; 3; 3; 2; 2; 3; 1; 2	3; 3; 3; 3; 2; 2; 3; 1; 2	3; 3; 3; 3; 2; 2; 3; 1; 2	3	By MS/MS; By MS/MS; By MS/MS; By MS/MS; By MS/MS; By MS/MS; By MS/MS; By MS/MS; By MS/MS	20.3; 27.7; 20.3; 20.3; 15.8; 15.8; 20.3; 8.5; 13	19713; 9165.6; 49376; 25615; 9920.4; 3185600; 4297.6; 0; 6082.1	21988; 13508; 89975; 66293; 28155; 433000; 0; 0; 39402	3; 2; 5; 4; 2; 1; 2; 2; 2	3; 3; 2; 2; 1; 2; 3; 1; 3	3; 3; 2; 2; 1; 2; 3; 1; 3	3; 3; 2; 2; 1; 2; 3; 1; 3	2	By MS/MS; By MS/MS; By MS/MS; By MS/MS; By matching; By MS/MS; By MS/MS; By matching; By MS/MS	20.3; 20.3; 15.8; 20.3; 11.9; 15.8; 24.9; 11.9; 20.3	12717; 7421.6; 16041; 9363.1; 1244.3; 3679.6; 7630.5; 4127.1; 21786	12930; 37742; 29195; 19608; 0; 0; 57915; 0; 26839	1; 3; 2; 1; 0; 3; 2; 0; 1
all7618	0.202517	1	false	truth	0.767111	0.171703	0.237373	0.0859669	0.580704	1.09781	2; 2; 0; 1; 1; 1; 1; 2; 2	2; 2; 0; 1; 1; 1; 1; 2; 2	2; 2; 0; 1; 1; 1; 1; 2; 2	1	By MS/MS; By matching; By matching; By matching; By matching; By matching; By matching; By matching; By matching	2.6; 2.5; 0; 0.9; 0.9; 0.9; 0.9; 1.9; 2.6	114100; 13202; 0; 23383; 12313; 640530; 5066.8; 1139200; 8066	433310; 0; 0; 0; 0; 0; 0; 446320; 0	1; 0; 0; 0; 0; 0; 0; 0; 0	2; 2; 0; 2; 2; 2; 2; 0; 2	2; 2; 0; 2; 2; 2; 2; 0; 2	2; 2; 0; 2; 2; 2; 2; 0; 2	2	By matching; By matching; By matching; By matching; By matching; By MS/MS; By MS/MS; By matching; By MS/MS	1.8; 2.6; 0; 2.6; 2.6; 2.6; 1.8; 0; 2.6	12388; 2561800; 0; 6957.9; 15509; 5714.7; 998560; 0; 1181400	0; 678200; 0; 0; 0; 0; 581180; 0; 496340	0; 0; 0; 0; 0; 1; 1; 0; 1
alr0020	0.616144	1	false	truth	1.06616	0.40406	0.235147	0.0320642	0.859876	1.34309	36; 39; 39; 35; 35; 29; 28; 34; 37	36; 39; 39; 35; 35; 29; 28; 34; 37	36; 39; 39; 35; 35; 29; 28; 34; 37	35	By MS/MS; By MS/MS; By MS/MS; By MS/MS; By MS/MS; By MS/MS; By MS/MS; By MS/MS; By MS/MS	38.2; 41.9; 39.6; 41.1; 40.5; 35.3; 31; 38.4; 39	1745200; 1852500; 1593800; 1795500; 1345100; 1476300; 1263100; 1247500; 1141500	1635900; 1404200; 1093000; 1027500; 940380; 760680; 1098800; 918330; 950840	88; 60; 83; 69; 41; 29; 60; 52; 61	35; 37; 37; 34; 22; 33; 33; 27; 33	35; 37; 37; 34; 22; 33; 33; 27; 33	35; 37; 37; 34; 22; 33; 33; 27; 33	33	By MS/MS; By MS/MS; By MS/MS; By MS/MS; By MS/MS; By MS/MS; By MS/MS; By MS/MS; By MS/MS	39.1; 41.7; 41.3; 38.8; 28.4; 38.4; 35.1; 33.8; 36	1638200; 1521400; 1855700; 1380300; 993280; 1724700; 1615000; 1633400; 1547700	1347200; 1220900; 1216300; 780800; 711950; 854810; 1038000; 1062100; 1072700	52; 77; 60; 31; 22; 37; 62; 21; 46
alr0021	0.523185	1	false	truth	1.11277	0.555811	0.32346	0.0588537	0.841747	1.52296	11; 8; 11; 11; 9; 10; 11; 10; 8	10; 7; 10; 10; 9; 9; 10; 9; 7	10; 7; 10; 10; 9; 9; 10; 9; 7	9	By MS/MS; By MS/MS; By MS/MS; By MS/MS; By MS/MS; By MS/MS; By MS/MS; By MS/MS; By MS/MS	87.6; 72; 87.6; 82.6; 79.5; 79.5; 86.3; 83.2; 72.7	4246100; 2726300; 4541700; 1969400; 2552800; 735900; 1272500; 1130800; 1085300	1274200; 1299500; 1601400; 1181800; 1223300; 497810; 1325900; 1015100; 1056100	179; 188; 179; 218; 246; 117; 291; 286; 292	10; 12; 8; 10; 7; 9; 9; 10; 12	9; 11; 7; 10; 7; 9; 8; 9; 11	9; 11; 7; 10; 7; 9; 8; 9; 11	9	By MS/MS; By MS/MS; By MS/MS; By MS/MS; By MS/MS; By MS/MS; By MS/MS; By MS/MS; By MS/MS	83.9; 90.7; 75.2; 84.5; 67.1; 80.1; 82; 83.9; 87.6	1904700; 3755400; 3330900; 1213800; 1114200; 1034300; 1123200; 1168600; 4879000	1280000; 1696500; 1010900; 926890; 514500; 759200; 946890; 1038900; 1360300	155; 181; 152; 234; 179; 158; 234; 89; 179
alr0022	0.401511	1	false	truth	1.10502	0.386365	0.224849	0.0239963	0.902976	1.3614	11; 12; 13; 13; 12; 14; 13; 12; 14	11; 12; 13; 13; 12; 14; 13; 12; 14	10; 11; 12; 12; 12; 13; 12; 11; 13	12	By MS/MS; By MS/MS; By MS/MS; By MS/MS; By MS/MS; By MS/MS; By MS/MS; By MS/MS; By MS/MS	87; 79; 84.6; 87; 85.8; 88.3; 83.3; 84.6; 90.1	3959700; 4735900; 8112800; 5692200; 5459500; 7473500; 4722600; 4149300; 4918900	3439300; 3124600; 3334300; 3769000; 3264000; 5030700; 3423700; 2688200; 3427100	156; 90; 187; 261; 123; 45; 207; 160; 211	13; 10; 12; 13; 10; 11; 13; 11; 12	13; 10; 12; 13; 10; 11; 13; 11; 12	12; 9; 11; 13; 10; 11; 12; 10; 11	11	By MS/MS; By MS/MS; By MS/MS; By MS/MS; By MS/MS; By MS/MS; By MS/MS; By MS/MS; By MS/MS	90.1; 77.8; 83.3; 80.2; 79; 84.6; 87; 80.2; 83.3	3808200; 3721400; 4071600; 3595500; 3889000; 4938500; 5325100; 4712000; 4839200	3552400; 3066300; 4145900; 2013700; 2594600; 3240400; 3591200; 3481700; 3487000	113; 180; 119; 57; 38; 95; 147; 28; 89
alr0051	0.0420845	1	false	truth	0.698791	0.334566	0.194704	0.035333	0.524503	0.924269	12; 11; 7; 11; 11; 10; 6; 9; 11	12; 11; 7; 11; 11; 10; 6; 9; 11	12; 11; 7; 11; 11; 10; 6; 9; 11	11	By MS/MS; By MS/MS; By MS/MS; By MS/MS; By MS/MS; By MS/MS; By MS/MS; By MS/MS; By MS/MS	56.3; 51.4; 31.8; 51.4; 50.1; 46; 30.2; 42.4; 49.9	63936; 102270; 94544; 63629; 153980; 74047; 44889; 89047; 106620	36116; 44542; 61008; 70981; 88372; 40648; 59536; 93115; 68930	7; 6; 5; 12; 10; 10; 3; 8; 8	10; 8; 11; 11; 13; 11; 11; 9; 9	10; 8; 11; 11; 13; 11; 11; 9; 9	10; 8; 11; 11; 13; 11; 11; 9; 9	11	By MS/MS; By MS/MS; By MS/MS; By MS/MS; By MS/MS; By MS/MS; By MS/MS; By MS/MS; By MS/MS	49.1; 38.2; 51.9; 53.2; 60.2; 50.6; 53.2; 49.6; 47	124850; 107350; 89251; 248020; 337610; 266420; 136920; 50197; 87340	79532; 65898; 100300; 154170; 139740; 111380; 78380; 55869; 69584	10; 7; 5; 17; 16; 11; 14; 5; 8
alr0052	0.0204772	1	false	truth	4.18729	4.39942	3.51743	0.524463	1.92466	15.6861	5; 5; 5; 6; 4; 4; 4; 6; 4	5; 5; 5; 6; 4; 4; 4; 6; 4	5; 5; 5; 6; 4; 4; 4; 6; 4	5	By MS/MS; By MS/MS; By MS/MS; By MS/MS; By MS/MS; By MS/MS; By MS/MS; By MS/MS; By MS/MS	58.9; 58.9; 58.9; 67.3; 49.5; 47.7; 47.7; 80.4; 47.7	65012; 81544; 81021; 96447; 92080; 104000; 21221; 21976; 12434	0; 38670; 46108; 91817; 93008; 34677; 0; 21772; 0	6; 2; 5; 6; 2; 1; 2; 4; 2	6; 3; 4; 4; 3; 5; 6; 6; 5	6; 3; 4; 4; 3; 5; 6; 6; 5	6; 3; 4; 4; 3; 5; 6; 6; 5	5	By MS/MS; By MS/MS; By MS/MS; By MS/MS; By MS/MS; By MS/MS; By MS/MS; By MS/MS; By MS/MS	67.3; 32.7; 47.7; 47.7; 34.6; 58.9; 67.3; 67.3; 57.9	45740; 0; 15746; 8957.2; 2620.4; 14421; 19705; 15625; 4027	28456; 0; 17349; 0; 0; 3517.6; 10866; 5229.8; 0	2; 1; 1; 1; 1; 0; 3; 0; 2
alr0088	0.0968317	1	false	truth	0.487428	0.145442	#N/A	0.253046	#N/A	#N/A	2; 1; 1; 1; 0; 0; 2; 2; 2	2; 1; 1; 1; 0; 0; 2; 2; 2	2; 1; 1; 1; 0; 0; 2; 2; 2	1	By MS/MS; By matching; By MS/MS; By MS/MS; By matching; By matching; By MS/MS; By MS/MS; By MS/MS	16.8; 8.4; 8.4; 8.4; 0; 0; 16.8; 16.8; 16.8	9300.3; 7687.8; 7488.4; 10924; 0; 0; 18646; 18266; 233.55	0; 0; 0; 0; 0; 0; 0; 19729; 0	1; 0; 2; 2; 0; 0; 2; 1; 2	2; 2; 2; 2; 1; 2; 3; 1; 2	2; 2; 2; 2; 1; 2; 3; 1; 2	2; 2; 2; 2; 1; 2; 3; 1; 2	2	By MS/MS; By MS/MS; By MS/MS; By MS/MS; By matching; By MS/MS; By MS/MS; By MS/MS; By MS/MS	16.8; 21.8; 16.8; 21.8; 8.4; 16.8; 30.3; 8.4; 16.8	36402; 22243; 103200; 75842; 93503; 74276; 65622; 61067; 59029	36569; 0; 52914; 0; 0; 0; 0; 0; 27811	1; 3; 1; 1; 0; 2; 3; 1; 2
alr0114	0.100413	1	false	truth	0.667682	0.389318	0.226568	0.091939	0.488098	0.982467	5; 7; 4; 8; 4; 6; 2; 5; 7	5; 7; 4; 8; 4; 6; 2; 5; 7	5; 7; 4; 8; 4; 6; 2; 5; 7	5	By MS/MS; By MS/MS; By MS/MS; By MS/MS; By MS/MS; By MS/MS; By MS/MS; By MS/MS; By MS/MS	23.4; 28.1; 19.3; 42.7; 23; 33.9; 12; 25.9; 39.4	47963; 70903; 29990; 83923; 16105; 62396; 21412; 58453; 75665	30186; 34312; 28660; 54944; 21536; 33659; 35280; 37271; 43194	5; 4; 5; 7; 3; 3; 2; 2; 8	5; 3; 6; 4; 4; 6; 5; 4; 4	5; 3; 6; 4; 4; 6; 5; 4; 4	5; 3; 6; 4; 4; 6; 5; 4; 4	4	By MS/MS; By MS/MS; By MS/MS; By MS/MS; By matching; By MS/MS; By MS/MS; By MS/MS; By MS/MS	30.3; 16.8; 29.9; 20.1; 22.3; 29.6; 24.1; 21.5; 15.7	182710; 194910; 219870; 21922; 31625; 113100; 48364; 75621; 173900	55314; 76748; 93023; 17861; 19878; 48517; 57042; 42376; 66402	1; 2; 1; 1; 0; 7; 8; 1; 7
alr0128	0.360986	1	false	truth	1.23592	0.729377	0.466711	0.0485241	0.816356	1.78155	6; 6; 6; 6; 4; 5; 2; 3; 2	6; 6; 6; 6; 4; 5; 2; 3; 2	6; 6; 6; 6; 4; 5; 2; 3; 2	5	By MS/MS; By MS/MS; By MS/MS; By MS/MS; By MS/MS; By MS/MS; By MS/MS; By MS/MS; By MS/MS	18; 20.9; 18.7; 19; 12.1; 14; 6.4; 10.1; 7.4	45435; 51451; 55635; 49147; 96671; 66741; 0; 12771; 12496	33492; 36033; 35464; 46716; 59753; 18430; 0; 18390; 14744	10; 5; 7; 7; 4; 2; 4; 4; 3	4; 4; 4; 3; 3; 5; 5; 5; 6	4; 4; 4; 3; 3; 5; 5; 5; 6	4; 4; 4; 3; 3; 5; 5; 5; 6	4	By MS/MS; By MS/MS; By MS/MS; By MS/MS; By MS/MS; By MS/MS; By MS/MS; By matching; By MS/MS	13.1; 13.5; 14.3; 9.6; 10.1; 15.8; 17; 15.3; 18.7	31353; 38285; 10262; 44250; 43204; 58581; 22790; 41397; 62449	23556; 33790; 0; 37657; 33722; 0; 23739; 12929; 31199	4; 4; 4; 2; 1; 4; 5; 0; 3
alr0140	0.438123	1	false	truth	1.20062	0.741162	0.479833	0.077077	0.791461	1.81033	6; 8; 6; 6; 4; 3; 3; 3; 4	6; 8; 6; 6; 4; 3; 3; 3; 4	6; 8; 6; 6; 4; 3; 3; 3; 4	4	By MS/MS; By MS/MS; By MS/MS; By MS/MS; By MS/MS; By MS/MS; By MS/MS; By MS/MS; By MS/MS	17.9; 23.7; 19.2; 18.8; 13.4; 9.6; 10; 12.3; 12.7	45989; 34466; 36567; 31016; 31719; 29084; 5459.5; 0; 26852	50706; 17089; 23584; 26204; 23189; 15136; 0; 0; 37901	8; 5; 5; 8; 5; 2; 4; 7; 8	4; 5; 5; 3; 5; 5; 7; 4; 3	4; 5; 5; 3; 5; 5; 7; 4; 3	4; 5; 5; 3; 5; 5; 7; 4; 3	5	By MS/MS; By MS/MS; By MS/MS; By MS/MS; By MS/MS; By MS/MS; By MS/MS; By MS/MS; By MS/MS	11.1; 13.9; 15.2; 8.7; 16.1; 17.4; 21.6; 9.1; 7.6	14961; 39887; 31082; 28762; 39785; 31790; 124610; 38002; 58503	0; 23434; 17091; 22438; 14495; 16630; 54998; 28572; 22947	5; 4; 5; 4; 2; 4; 8; 1; 1
alr0162	0.422081	1	false	truth	0.830438	0.464679	0.334772	0.0657589	0.537639	1.24014	3; 1; 2; 0; 1; 1; 3; 3; 3	3; 1; 2; 0; 1; 1; 3; 3; 3	3; 1; 2; 0; 1; 1; 3; 3; 3	2	By MS/MS; By matching; By MS/MS; By matching; By matching; By matching; By MS/MS; By MS/MS; By MS/MS	13.2; 4.1; 10.5; 0; 4.1; 4.1; 13.2; 13.2; 14.7	17348; 7116.8; 8021.3; 0; 5614.7; 6713; 13205; 22899; 4368.4	15657; 0; 9757.3; 0; 0; 0; 14106; 11289; 4121.2	2; 0; 1; 0; 0; 0; 3; 2; 1	3; 3; 2; 2; 0; 3; 2; 2; 2	3; 3; 2; 2; 0; 3; 2; 2; 2	3; 3; 2; 2; 0; 3; 2; 2; 2	2	By MS/MS; By MS/MS; By matching; By matching; By matching; By MS/MS; By MS/MS; By matching; By matching	13.2; 13.2; 8.3; 8.3; 0; 13.2; 8.3; 8.3; 9	15526; 16500; 15993; 12394; 0; 41436; 24412; 17725; 23825	7853.4; 8293; 12933; 11101; 0; 26991; 17607; 12727; 13734	1; 1; 0; 0; 0; 2; 2; 0; 0
alr0223	0.521531	1	false	truth	1.1704	0.714526	0.486157	0.0743483	0.750429	1.77838	3; 3; 3; 1; 1; 2; 1; 2; 3	3; 3; 3; 1; 1; 2; 1; 2; 3	3; 3; 3; 1; 1; 2; 1; 2; 3	2	By MS/MS; By MS/MS; By MS/MS; By matching; By matching; By matching; By MS/MS; By MS/MS; By MS/MS	11.6; 15.3; 11.6; 6.5; 3.5; 8.9; 5.4; 8.9; 12.4	38421; 40263; 17408; 1311.4; 0; 6762.7; 20122; 32473; 30115	29740; 29147; 0; 0; 0; 7233.8; 15356; 18973; 16427	4; 2; 4; 0; 0; 0; 2; 2; 6	2; 2; 2; 2; 1; 3; 2; 2; 2	2; 2; 2; 2; 1; 3; 2; 2; 2	2; 2; 2; 2; 1; 3; 2; 2; 2	2	By MS/MS; By MS/MS; By MS/MS; By MS/MS; By MS/MS; By MS/MS; By MS/MS; By MS/MS; By MS/MS	11.8; 8.9; 8.9; 8.9; 5.4; 12.4; 8.9; 8.9; 8.9	8106.1; 15722; 15446; 37604; 33199; 8910.7; 12160; 42966; 23343	18574; 0; 14537; 21582; 20377; 3112.2; 11602; 21780; 20647	2; 2; 1; 4; 3; 6; 4; 2; 4
alr0237	0.611625	1	false	truth	0.910941	0.488666	0.284385	0.0536689	0.665735	1.25947	8; 6; 5; 6; 4; 4; 5; 7; 7	8; 6; 5; 6; 4; 4; 5; 7; 7	8; 6; 5; 6; 4; 4; 5; 7; 7	6	By MS/MS; By MS/MS; By MS/MS; By MS/MS; By MS/MS; By matching; By MS/MS; By MS/MS; By MS/MS	22.6; 16.1; 13.6; 15.1; 10; 11.2; 14.3; 24.8; 20	51730; 91198; 96378; 44547; 51555; 148300; 53630; 64658; 66093	44462; 69693; 67777; 22812; 36982; 71791; 48672; 45188; 41186	5; 4; 6; 10; 2; 0; 9; 12; 9	6; 6; 6; 10; 6; 9; 5; 4; 7	6; 6; 6; 10; 6; 9; 5; 4; 7	6; 6; 6; 10; 6; 9; 5; 4; 7	6	By MS/MS; By MS/MS; By MS/MS; By MS/MS; By MS/MS; By MS/MS; By MS/MS; By matching; By MS/MS	17.7; 14.5; 15.1; 38.7; 16.9; 26.3; 12.4; 11; 21	35120; 32181; 49074; 108600; 151650; 128490; 35112; 52844; 163270	32480; 30194; 61531; 83047; 83214; 65080; 27845; 56292; 75102	3; 3; 7; 9; 1; 9; 7; 0; 9
alr0318	0.138997	1	false	truth	1.30291	0.617561	0.387409	0.0493783	0.967518	1.77365	4; 3; 4; 4; 3; 4; 3; 4; 3	4; 3; 4; 4; 3; 4; 3; 4; 3	4; 3; 4; 4; 3; 4; 3; 4; 3	4	By MS/MS; By MS/MS; By MS/MS; By MS/MS; By MS/MS; By MS/MS; By MS/MS; By MS/MS; By MS/MS	47; 40.2; 47; 47; 29.1; 47; 36.8; 47; 36.8	99269; 54350; 52038; 132470; 96774; 85082; 82987; 157860; 90963	60895; 49871; 50391; 65342; 71998; 34344; 103040; 73758; 115740	6; 3; 4; 4; 2; 2; 3; 7; 2	4; 3; 3; 3; 4; 3; 2; 3; 4	4; 3; 3; 3; 4; 3; 2; 3; 4	4; 3; 3; 3; 4; 3; 2; 3; 4	3	By MS/MS; By MS/MS; By MS/MS; By MS/MS; By MS/MS; By MS/MS; By MS/MS; By MS/MS; By MS/MS	47; 40.2; 36.8; 40.2; 47; 36.8; 29.9; 40.2; 47	42115; 64556; 32345; 145310; 108370; 27688; 47746; 107550; 110540	36276; 44988; 27148; 68637; 77336; 0; 0; 63240; 57752	4; 3; 2; 4; 3; 1; 2; 2; 2
alr0335	0.973791	1	false	truth	0.988966	0.81558	0.588914	0.20393	0.535311	1.94931	4; 4; 5; 3; 1; 1; 2; 3; 3	4; 4; 5; 3; 1; 1; 2; 3; 3	4; 4; 5; 3; 1; 1; 2; 3; 3	3	By MS/MS; By MS/MS; By MS/MS; By MS/MS; By MS/MS; By matching; By MS/MS; By MS/MS; By MS/MS	9.3; 8.1; 11.9; 7.2; 2; 2.1; 3.9; 9.8; 9.6	39636; 43404; 34073; 16794; 0; 11614; 1727.1; 18602; 5592.6	86638; 42678; 57548; 33949; 0; 0; 0; 0; 0	3; 1; 3; 2; 1; 0; 1; 2; 1	5; 2; 3; 5; 1; 6; 3; 2; 5	5; 2; 3; 5; 1; 6; 3; 2; 5	5; 2; 3; 5; 1; 6; 3; 2; 5	3	By MS/MS; By MS/MS; By MS/MS; By MS/MS; By matching; By MS/MS; By MS/MS; By matching; By MS/MS	11.4; 4.2; 5.7; 13.2; 3.4; 15.4; 7.5; 4.7; 12.8	48686; 38318; 47658; 85237; 2740.2; 38218; 9503.6; 21725; 20198	65236; 116740; 98728; 45011; 0; 35443; 22656; 43753; 22939	1; 1; 1; 3; 0; 4; 1; 0; 1
alr0397	0.807633	1	false	truth	1.06573	0.562569	0.504829	0.10265	0.640948	1.73432	3; 2; 2; 1; 2; 2; 2; 1; 3	3; 2; 2; 1; 2; 2; 2; 1; 3	3; 2; 2; 1; 2; 2; 2; 1; 3	2	By MS/MS; By matching; By MS/MS; By matching; By matching; By matching; By MS/MS; By matching; By matching	4.6; 2.7; 2.8; 1.2; 3.3; 2.2; 4.5; 2.2; 4.7	8028.6; 8935.1; 6188.4; 7115.8; 8700.3; 28452; 3753.4; 1280.4; 13796	19437; 21299; 0; 0; 0; 0; 8240.1; 0; 19066	2; 0; 1; 0; 0; 0; 1; 0; 0	2; 1; 0; 3; 2; 4; 3; 1; 3	2; 1; 0; 3; 2; 4; 3; 1; 3	2; 1; 0; 3; 2; 4; 3; 1; 3	2	By matching; By matching; By matching; By matching; By matching; By MS/MS; By MS/MS; By matching; By matching	2.4; 1.3; 0; 5; 3.7; 5.7; 4.5; 2.3; 3.1	7389.6; 707.37; 0; 8313.6; 22520; 8645.8; 6677.3; 1720.5; 6570	0; 0; 0; 23581; 18213; 11400; 9732.1; 0; 19491	0; 0; 0; 0; 0; 2; 1; 0; 0
alr0517	0.995647	1	false	truth	0.999061	0.445564	0.30015	0.0417815	0.732921	1.35233	2; 1; 3; 6; 6; 1; 3; 4; 3	2; 1; 3; 6; 6; 1; 3; 4; 3	2; 1; 3; 6; 6; 1; 3; 4; 3	3	By matching; By MS/MS; By MS/MS; By MS/MS; By MS/MS; By MS/MS; By MS/MS; By MS/MS; By MS/MS	13.2; 6.8; 16.6; 31.4; 32.3; 6.8; 19.1; 22.8; 14.8	9460.5; 5400.1; 30948; 37603; 26259; 8990.3; 14856; 15703; 32439	10736; 0; 17088; 13020; 15264; 0; 14871; 24014; 24933	0; 1; 4; 5; 3; 1; 3; 4; 3	2; 1; 2; 4; 3; 5; 4; 4; 2	2; 1; 2; 4; 3; 5; 4; 4; 2	2; 1; 2; 4; 3; 5; 4; 4; 2	3	By MS/MS; By MS/MS; By MS/MS; By MS/MS; By MS/MS; By MS/MS; By MS/MS; By matching; By MS/MS	10.2; 4.3; 10.2; 20.3; 16; 25.5; 22.8; 19.4; 12.3	2683.1; 0; 15101; 51253; 39827; 36995; 11864; 23795; 9359.8	0; 0; 18876; 20168; 24340; 20455; 11936; 14751; 17732	2; 1; 1; 4; 3; 4; 2; 0; 1
alr0523	0.0872917	1	false	truth	1.20371	0.381937	0.222273	0.028685	1.01094	1.46757	12; 14; 13; 14; 14; 12; 11; 12; 11	12; 14; 13; 14; 14; 12; 11; 12; 11	12; 14; 13; 14; 14; 12; 11; 12; 11	12	By MS/MS; By MS/MS; By MS/MS; By MS/MS; By MS/MS; By MS/MS; By MS/MS; By MS/MS; By MS/MS	75; 78.5; 75; 78.5; 78.5; 75; 64; 75; 64	1184100; 1954200; 1979800; 2516500; 1586900; 2834000; 2516800; 2241100; 2575400	1109600; 1443300; 1135100; 1527500; 1239400; 944040; 1568900; 1407300; 1426800	44; 37; 50; 62; 38; 27; 47; 41; 46	11; 12; 12; 13; 12; 13; 14; 13; 13	11; 12; 12; 13; 12; 13; 14; 13; 13	11; 12; 12; 13; 12; 13; 14; 13; 13	13	By MS/MS; By MS/MS; By MS/MS; By MS/MS; By MS/MS; By MS/MS; By MS/MS; By MS/MS; By MS/MS	75; 75; 75; 66.3; 75; 78.5; 77.3; 75; 78.5	1534700; 1843400; 2527200; 2184400; 2224100; 1660300; 1573500; 1489800; 1088100	1374700; 1321700; 1241500; 1261000; 1167400; 1216800; 760450; 1010800; 657440	18; 42; 33; 30; 23; 26; 26; 17; 18
alr0524	0.183824	1	false	truth	1.47898	1.32792	0.7728	0.198006	0.907115	2.78115	8; 7; 9; 6; 8; 10; 8; 9; 9	8; 7; 9; 6; 8; 10; 8; 9; 9	8; 7; 9; 6; 8; 10; 8; 9; 9	8	By MS/MS; By MS/MS; By MS/MS; By MS/MS; By MS/MS; By MS/MS; By MS/MS; By MS/MS; By MS/MS	54.9; 61.1; 62.3; 53.1; 54.3; 66.7; 62.3; 54.9; 66.7	1836000; 1978900; 1863700; 1043000; 1020500; 1190700; 492470; 532890; 872750	1351200; 1445700; 1227000; 997770; 1353200; 445160; 501490; 500210; 530510	93; 89; 82; 105; 99; 44; 83; 102; 108	7; 9; 9; 7; 8; 10; 9; 7; 8	7; 9; 9; 7; 8; 10; 9; 7; 8	7; 9; 9; 7; 8; 10; 9; 7; 8	8	By MS/MS; By MS/MS; By MS/MS; By MS/MS; By MS/MS; By MS/MS; By MS/MS; By MS/MS; By MS/MS	50.6; 62.3; 66; 64.8; 54.3; 66.7; 66.7; 50; 61.7	1253300; 975760; 848260; 401490; 437200; 2204600; 1123100; 1007400; 821290	1290900; 973880; 1194500; 272500; 313630; 633030; 309770; 293190; 295590	70; 75; 72; 68; 62; 84; 51; 11; 56
alr0525	0.241888	1	false	truth	1.33101	0.96781	0.563228	0.1181	0.883574	2.13494	7; 7; 9; 8; 6; 6; 8; 4; 7	6; 6; 8; 7; 5; 6; 6; 4; 5	6; 6; 8; 7; 5; 6; 6; 4; 5	6	By MS/MS; By MS/MS; By MS/MS; By MS/MS; By MS/MS; By MS/MS; By MS/MS; By MS/MS; By MS/MS	37.4; 37.4; 40.6; 40.6; 33.5; 33.8; 38.1; 27.7; 35.6	184050; 95400; 112270; 268310; 334490; 450440; 483610; 247270; 498280	153750; 80408; 103090; 271720; 131700; 257750; 262890; 134480; 287890	10; 6; 14; 13; 10; 13; 14; 9; 16	7; 6; 8; 6; 8; 7; 5; 5; 5	6; 5; 7; 5; 6; 5; 4; 4; 4	6; 5; 7; 5; 6; 5; 4; 4; 4	5	By MS/MS; By MS/MS; By MS/MS; By MS/MS; By MS/MS; By MS/MS; By MS/MS; By MS/MS; By MS/MS	37.1; 33.5; 39.6; 33.5; 38.1; 27.3; 30.2; 29.9; 30.2	93080; 103150; 556760; 313720; 322660; 261190; 138020; 137290; 126610	103410; 77145; 321860; 248960; 103850; 208060; 86118; 99546; 85478	8; 9; 12; 12; 8; 4; 13; 8; 10
alr0528	0.0359655	1	false	truth	1.22509	0.33646	0.195807	0.0228646	1.05361	1.45391	15; 13; 14; 17; 16; 14; 16; 16; 16	15; 13; 14; 17; 16; 14; 16; 16; 16	15; 13; 14; 17; 16; 14; 16; 16; 16	16	By MS/MS; By MS/MS; By MS/MS; By MS/MS; By MS/MS; By MS/MS; By MS/MS; By MS/MS; By MS/MS	89; 84.4; 86.7; 89; 89; 89; 89; 89.6; 86.1	8945300; 8944100; 8501000; 8899100; 9641500; 7822100; 6386600; 5319700; 6549900	4807400; 4390600; 3705500; 4336800; 4661800; 3840200; 4303900; 3962100; 4355100	233; 200; 194; 316; 273; 133; 357; 217; 461	17; 15; 14; 15; 14; 16; 16; 13; 14	17; 15; 14; 15; 14; 16; 16; 13; 14	17; 15; 14; 15; 14; 16; 16; 13; 14	15	By MS/MS; By MS/MS; By MS/MS; By MS/MS; By MS/MS; By MS/MS; By MS/MS; By MS/MS; By MS/MS	89; 85; 84.4; 88.4; 89; 89; 89; 82.7; 85	7828100; 6870600; 7271400; 5559800; 4872200; 5515800; 5640200; 5532800; 5978600	4418400; 3787500; 3684100; 2633400; 2679600; 3324500; 3664300; 4036400; 3664500	218; 231; 205; 181; 168; 166; 385; 167; 166
alr0529	0.729915	1	false	truth	0.902296	0.796015	0.46325	0.113551	0.512457	1.5233	10; 9; 9; 8; 9; 9; 9; 9; 9	10; 9; 9; 8; 9; 9; 9; 9; 9	10; 9; 9; 8; 9; 9; 9; 9; 9	9	By MS/MS; By MS/MS; By MS/MS; By MS/MS; By MS/MS; By MS/MS; By MS/MS; By MS/MS; By MS/MS	62.6; 57.7; 57.7; 55.8; 57.7; 56.4; 60.1; 60.1; 60.1	7741000; 5128200; 10295000; 2300200; 2354400; 10580000; 1825500; 2392700; 2369300	5652700; 4645400; 6534100; 1951400; 1724600; 7047100; 1681800; 2139900; 1614200	174; 126; 193; 177; 126; 68; 113; 97; 132	9; 10; 8; 9; 10; 9; 8; 8; 8	9; 10; 8; 9; 10; 9; 8; 8; 8	9; 10; 8; 9; 10; 9; 8; 8; 8	9	By MS/MS; By MS/MS; By MS/MS; By MS/MS; By MS/MS; By MS/MS; By MS/MS; By MS/MS; By MS/MS	57.7; 62.6; 55.8; 62; 62; 60.1; 60.1; 55.8; 55.8	6616600; 7181700; 7038100; 1811200; 1706100; 4777500; 6540100; 8663600; 10027000	4579000; 5860200; 5483400; 1349800; 1043600; 2108000; 4322800; 5231100; 7165800	143; 148; 140; 119; 95; 94; 129; 61; 102
alr0530	0.516882	1	false	truth	1.32094	1.76487	1.02709	0.460546	0.652199	4.24512	13; 11; 9; 11; 11; 9; 15; 8; 15	13; 11; 9; 11; 11; 9; 15; 8; 15	12; 10; 8; 10; 10; 9; 13; 8; 13	10	By MS/MS; By MS/MS; By MS/MS; By MS/MS; By MS/MS; By MS/MS; By MS/MS; By MS/MS; By MS/MS	42.3; 39.2; 36; 33.2; 36.4; 31.5; 46.2; 30.4; 58.7	614950; 684950; 956590; 971440; 1076700; 1878500; 628070; 465330; 474380	428720; 608100; 710450; 715500; 730780; 1365100; 254920; 318960; 197980	27; 23; 25; 33; 27; 16; 33; 20; 20	10; 13; 10; 8; 11; 11; 10; 6; 13	10; 13; 10; 8; 11; 11; 10; 6; 13	9; 12; 9; 7; 9; 9; 9; 5; 12	9	By MS/MS; By MS/MS; By MS/MS; By MS/MS; By MS/MS; By MS/MS; By MS/MS; By MS/MS; By MS/MS	35.7; 42.7; 29.7; 27.6; 35.7; 35; 38.5; 21.7; 45.8	652620; 734940; 1289800; 504930; 523490; 414230; 454930; 302560; 831370	481480; 761350; 1670800; 147170; 156770; 110240; 191270; 129760; 378030	16; 22; 20; 7; 7; 10; 18; 4; 16
alr0532	0.00164112	1	false	false	Infinity	#N/A	#N/A	#N/A	#N/A	#N/A	0; 0; 2; 2; 1; 1; 1; 1; 2	0; 0; 2; 2; 1; 1; 1; 1; 2	0; 0; 2; 2; 1; 1; 1; 1; 2	1	By matching; By matching; By MS/MS; By MS/MS; By matching; By matching; By MS/MS; By MS/MS; By MS/MS	0; 0; 14.1; 14.1; 8; 8; 8; 8; 14.1	0; 0; 801.5; 35691; 2611.6; 4831.6; 5892.5; 5035.5; 10312	0; 0; 0; 0; 2996; 0; 4193.8; 4700.9; 4422.5	0; 0; 1; 1; 0; 0; 2; 5; 2	0; 1; 0; 0; 0; 1; 1; 0; 0	0; 1; 0; 0; 0; 1; 1; 0; 0	0; 1; 0; 0; 0; 1; 1; 0; 0	0	By matching; By matching; By matching; By matching; By matching; By matching; By MS/MS; By matching; By matching	0; 8; 0; 0; 0; 8; 8; 0; 0	0; 2202.9; 0; 0; 0; 1091.4; 1651.1; 0; 0	0; 0; 0; 0; 0; 0; 0; 0; 0	0; 0; 0; 0; 0; 0; 2; 0; 0
alr0534	0.0671213	1	false	truth	1.2383	0.418972	0.243825	0.0282583	1.02436	1.52426	10; 8; 10; 9; 8; 8; 7; 7; 8	8; 7; 8; 7; 7; 7; 6; 6; 7	8; 7; 8; 7; 7; 7; 6; 6; 7	7	By MS/MS; By MS/MS; By MS/MS; By MS/MS; By MS/MS; By MS/MS; By MS/MS; By MS/MS; By MS/MS	40.1; 37.3; 37.6; 34.4; 37.3; 36.6; 31.9; 28.7; 37.6	291310; 291340; 216070; 403940; 358680; 385190; 418980; 454720; 298580	197540; 175960; 149460; 223840; 232330; 167730; 230310; 233660; 163710	12; 12; 12; 9; 5; 7; 10; 10; 11	8; 7; 10; 6; 10; 7; 7; 10; 7	7; 6; 9; 5; 9; 6; 7; 8; 7	7; 6; 9; 5; 9; 6; 7; 8; 7	7	By MS/MS; By MS/MS; By MS/MS; By MS/MS; By MS/MS; By MS/MS; By MS/MS; By MS/MS; By MS/MS	37.3; 33; 44.1; 28.7; 40.1; 33; 35.8; 43.4; 36.9	155020; 105840; 246740; 229650; 408060; 326040; 302310; 279600; 244720	159040; 144290; 201400; 106200; 168610; 201330; 136020; 138840; 197190	9; 11; 10; 4; 4; 10; 10; 5; 9
alr0535	0.0330376	1	false	truth	1.6368	1.09942	0.639821	0.108585	1.12979	2.54257	7; 7; 7; 6; 6; 6; 7; 6; 9	7; 7; 7; 6; 6; 6; 7; 6; 9	7; 7; 7; 6; 6; 6; 7; 6; 9	7	By MS/MS; By MS/MS; By MS/MS; By MS/MS; By MS/MS; By MS/MS; By MS/MS; By MS/MS; By MS/MS	32; 34.4; 32; 29.1; 30.4; 38.1; 33.6; 25.1; 37.7	390530; 443800; 357580; 388080; 220230; 460920; 213790; 148520; 193880	305240; 303700; 263890; 252470; 161760; 283150; 121460; 120330; 164040	9; 8; 11; 16; 3; 7; 8; 7; 10	8; 7; 6; 5; 4; 7; 5; 5; 3	8; 7; 6; 5; 4; 7; 5; 5; 3	8; 7; 6; 5; 4; 7; 5; 5; 3	5	By MS/MS; By MS/MS; By MS/MS; By MS/MS; By MS/MS; By MS/MS; By MS/MS; By MS/MS; By MS/MS	36.8; 33.6; 35.6; 21.5; 18.2; 33.2; 22.7; 22.3; 16.6	277780; 201760; 263750; 224050; 278860; 225310; 163890; 134740; 161620	221930; 168530; 247020; 101280; 119570; 87417; 82038; 71430; 108390	4; 5; 6; 3; 3; 5; 9; 4; 5
alr0536	0.158293	1	false	truth	1.36564	0.631502	0.515886	0.0934591	0.946609	2.06625	3; 1; 4; 2; 4; 5; 3; 2; 3	3; 1; 4; 2; 4; 5; 3; 2; 3	3; 1; 4; 2; 4; 5; 3; 2; 3	3	By MS/MS; By MS/MS; By MS/MS; By MS/MS; By MS/MS; By MS/MS; By MS/MS; By MS/MS; By MS/MS	16.9; 5.5; 19.8; 13.1; 26.2; 31.6; 19.8; 15.6; 18.1	37530; 29725; 47767; 33726; 24159; 71335; 57401; 18167; 40883	19113; 0; 31147; 24323; 14146; 32978; 23037; 0; 22981	2; 1; 2; 2; 1; 4; 3; 2; 2	0; 3; 3; 1; 3; 3; 1; 3; 2	0; 3; 3; 1; 3; 3; 1; 3; 2	0; 3; 3; 1; 3; 3; 1; 3; 2	3	By matching; By MS/MS; By matching; By MS/MS; By MS/MS; By MS/MS; By MS/MS; By MS/MS; By MS/MS	0; 17.3; 19.4; 7.6; 21.1; 16; 5.5; 17.3; 8.4	0; 34371; 19621; 4369.9; 14632; 9795.1; 14719; 48126; 15386	0; 24898; 16502; 0; 12498; 0; 0; 15172; 0	0; 2; 0; 1; 1; 1; 2; 2; 2
alr0537	0.0234021	1	false	truth	1.42887	0.634267	0.369119	0.0450825	1.11262	1.88003	9; 7; 11; 7; 7; 8; 11; 8; 10	9; 7; 11; 7; 7; 8; 11; 8; 10	7; 6; 9; 5; 6; 7; 10; 7; 9	7	By MS/MS; By MS/MS; By MS/MS; By MS/MS; By MS/MS; By MS/MS; By MS/MS; By MS/MS; By MS/MS	44.7; 35.6; 56.5; 33.6; 37.2; 43.5; 55.3; 41.5; 51.4	663340; 749200; 966850; 1123400; 1094400; 1033400; 803980; 681510; 846810	498250; 845750; 610260; 630180; 546540; 491870; 433510; 339900; 475130	38; 27; 42; 46; 25; 11; 47; 30; 38	8; 8; 8; 8; 9; 9; 7; 8; 7	8; 8; 8; 8; 9; 9; 7; 8; 7	7; 7; 7; 7; 8; 8; 7; 6; 7	7	By MS/MS; By MS/MS; By MS/MS; By MS/MS; By MS/MS; By MS/MS; By MS/MS; By MS/MS; By MS/MS	41.5; 44.7; 41.5; 37.5; 48.6; 51.8; 42.3; 40.7; 41.5	592490; 571040; 435840; 650360; 689910; 780750; 322150; 632330; 575150	489350; 393960; 323240; 306450; 302350; 346440; 275300; 422800; 581690	31; 25; 20; 22; 16; 22; 27; 10; 20
alr0540	0.75931	1	false	truth	0.914654	0.67182	0.469938	0.0649413	0.488061	1.46829	3; 3; 3; 6; 3; 3; 2; 6; 1	3; 3; 3; 6; 3; 3; 2; 6; 1	3; 3; 3; 6; 3; 3; 2; 6; 1	3	By matching; By matching; By MS/MS; By MS/MS; By MS/MS; By matching; By MS/MS; By MS/MS; By MS/MS	4.7; 4; 6; 10.7; 6.1; 4.6; 3.7; 10.7; 1.4	510130; 541540; 381490; 142440; 4122.9; 133550; 101110; 125720; 87588	304190; 0; 242490; 123360; 0; 84986; 69099; 115970; 0	0; 0; 1; 1; 1; 0; 1; 1; 1	4; 1; 2; 5; 4; 4; 2; 3; 4	4; 1; 2; 5; 4; 4; 2; 3; 4	4; 1; 2; 5; 4; 4; 2; 3; 4	4	By matching; By matching; By matching; By MS/MS; By MS/MS; By MS/MS; By matching; By matching; By MS/MS	7; 1.4; 3.7; 10; 7; 7; 3.1; 5.2; 7.9	331560; 252340; 315150; 489720; 499520; 353630; 236580; 199680; 171480	190390; 0; 184470; 317850; 284650; 137040; 131730; 100770; 134480	0; 0; 0; 1; 1; 2; 0; 0; 0
alr0577	0.0596512	1	false	truth	0.655896	0.431401	0.251059	0.0435288	0.427308	0.944183	4; 5; 6; 4; 6; 4; 5; 3; 6	4; 5; 6; 4; 6; 4; 5; 3; 6	4; 5; 6; 4; 6; 4; 5; 3; 6	5	By MS/MS; By MS/MS; By MS/MS; By MS/MS; By MS/MS; By MS/MS; By MS/MS; By MS/MS; By MS/MS	35.8; 49.1; 60; 38.2; 60; 37.6; 49.1; 27.9; 60	130850; 153100; 92293; 112020; 109860; 209080; 233590; 55434; 294930	61511; 83950; 29274; 71550; 55319; 157160; 123720; 32265; 131550	15; 18; 15; 14; 7; 3; 12; 9; 9	4; 6; 6; 3; 3; 3; 6; 4; 6	4; 6; 6; 3; 3; 3; 6; 4; 6	4; 6; 6; 3; 3; 3; 6; 4; 6	4	By MS/MS; By MS/MS; By MS/MS; By MS/MS; By MS/MS; By MS/MS; By MS/MS; By MS/MS; By MS/MS	35.8; 60; 60; 27.9; 27.9; 27.9; 60; 35.8; 60	109190; 102340; 99381; 240160; 197290; 280070; 385700; 284650; 325930	78817; 72344; 66461; 153190; 139850; 137850; 173460; 169620; 191950	8; 9; 9; 11; 5; 8; 7; 6; 5
alr0608	0.120258	1	false	truth	0.757603	0.342843	0.226212	0.0357768	0.553634	1.01779	7; 3; 5; 5; 3; 3; 3; 2; 2	7; 3; 5; 5; 3; 3; 3; 2; 2	7; 3; 5; 5; 3; 3; 3; 2; 2	3	By MS/MS; By matching; By MS/MS; By MS/MS; By matching; By matching; By MS/MS; By matching; By MS/MS	19.3; 8.4; 15.5; 16.6; 10; 8; 11.6; 5.7; 5.9	27609; 3061.2; 18578; 31091; 18574; 16958; 18733; 0; 12399	17570; 0; 9569.6; 17124; 10298; 17185; 28498; 0; 0	4; 0; 3; 2; 0; 0; 3; 0; 2	6; 5; 6; 4; 2; 4; 4; 5; 3	6; 5; 6; 4; 2; 4; 4; 5; 3	6; 5; 6; 4; 2; 4; 4; 5; 3	4	By MS/MS; By MS/MS; By MS/MS; By MS/MS; By MS/MS; By MS/MS; By MS/MS; By matching; By MS/MS	19.8; 15; 19.1; 13.2; 5.7; 10.9; 12; 16.1; 9.3	21054; 29267; 19120; 18125; 29635; 36537; 23049; 35378; 45576	17864; 30772; 14854; 25507; 24482; 25704; 17786; 16031; 29453	1; 3; 4; 1; 1; 2; 2; 0; 3
alr0610	0.28624	1	false	truth	0.601731	0.581326	0.430143	0.323163	0.292454	1.48561	2; 2; 4; 2; 2; 2; 1; 1; 2	2; 2; 4; 2; 2; 2; 1; 1; 2	1; 1; 3; 1; 1; 2; 0; 1; 1	1	By MS/MS; By matching; By MS/MS; By MS/MS; By MS/MS; By matching; By MS/MS; By MS/MS; By MS/MS	4.6; 4.3; 8.7; 4.6; 4.3; 3.5; 2.4; 2.9; 4.3	6032.7; 3583.3; 13538; 30631; 4023.8; 6615.1; 0; 1153.1; 3352.8	11598; 4624.7; 6275.7; 22368; 0; 11570; 0; 0; 8374.1	2; 0; 2; 2; 1; 0; 1; 1; 1	3; 3; 4; 5; 2; 3; 4; 3; 1	3; 3; 4; 5; 2; 3; 4; 3; 1	3; 2; 3; 4; 2; 2; 3; 2; 0	2	By matching; By MS/MS; By matching; By matching; By matching; By matching; By matching; By matching; By MS/MS	5.2; 7.6; 9.4; 11.4; 4.6; 7.5; 9.1; 6.8; 2.4	103410; 91233; 100270; 24197; 2241.1; 65806; 8831.3; 5544.3; 2277	33129; 0; 31009; 17560; 0; 20617; 5308.8; 4783.8; 0	0; 1; 0; 0; 0; 0; 0; 0; 1
alr0652	0.579584	1	false	truth	1.13996	0.650901	0.657595	0.219423	0.650054	2.27076	1; 1; 1; 0; 1; 1; 3; 3; 1	1; 1; 1; 0; 1; 1; 3; 3; 1	1; 1; 1; 0; 1; 1; 3; 3; 1	1	By MS/MS; By matching; By MS/MS; By matching; By matching; By matching; By MS/MS; By MS/MS; By MS/MS	5.6; 2.8; 5.6; 0; 2.8; 5.6; 11; 14; 5.6	0; 6603.3; 0; 0; 3409.5; 2291.8; 6847.8; 11788; 0	0; 0; 0; 0; 0; 0; 9722.7; 11439; 0	1; 0; 1; 0; 0; 0; 5; 1; 4	1; 0; 1; 3; 2; 3; 4; 1; 4	1; 0; 1; 3; 2; 3; 4; 1; 4	1; 0; 1; 3; 2; 3; 4; 1; 4	2	By matching; By matching; By MS/MS; By MS/MS; By MS/MS; By MS/MS; By MS/MS; By matching; By MS/MS	2.8; 0; 5.6; 14; 8.4; 15.7; 18.5; 5.6; 21.6	1926.4; 0; 0; 20401; 22326; 12212; 8430.7; 5731.1; 10129	0; 0; 0; 6740.4; 14755; 11136; 11416; 0; 4318.6	0; 0; 1; 3; 2; 1; 5; 0; 7
alr0657	0.0843858	1	false	truth	0.398646	0.285857	0.313381	0.2339	0.142198	0.898518	1; 3; 1; 3; 2; 3; 1; 0; 0	1; 3; 1; 3; 2; 3; 1; 0; 0	1; 3; 1; 3; 2; 3; 1; 0; 0	1	By MS/MS; By MS/MS; By matching; By MS/MS; By MS/MS; By MS/MS; By MS/MS; By matching; By matching	3.5; 13.5; 4.5; 12.5; 9; 11.3; 3.5; 0; 0	7908.8; 8488.1; 3123.3; 24718; 11134; 11262; 0; 0; 0	0; 0; 0; 12670; 5693.4; 4551.9; 0; 0; 0	1; 2; 0; 3; 2; 0; 1; 0; 0	1; 1; 1; 2; 4; 2; 1; 2; 2	1; 1; 1; 2; 4; 2; 1; 2; 2	1; 1; 1; 2; 4; 2; 1; 2; 2	2	By MS/MS; By matching; By MS/MS; By MS/MS; By MS/MS; By MS/MS; By matching; By matching; By MS/MS	3.5; 3.5; 3.5; 9; 21.2; 9; 5.5; 9; 7.1	8786; 5764.2; 0; 45347; 74979; 27224; 6776; 17775; 17770	0; 0; 0; 30753; 30168; 17188; 0; 10863; 0	1; 0; 1; 4; 2; 3; 0; 0; 2
alr0658	0.0830845	1	false	truth	0.701918	0.369383	0.221238	0.0563183	0.512244	0.975373	5; 9; 6; 5; 2; 6; 4; 4; 4	5; 9; 6; 5; 2; 6; 4; 4; 4	5; 9; 6; 5; 2; 6; 4; 4; 4	5	By MS/MS; By MS/MS; By MS/MS; By MS/MS; By MS/MS; By MS/MS; By MS/MS; By MS/MS; By MS/MS	14.5; 28.9; 18.7; 12.1; 6.5; 18; 14.3; 12.8; 14.1	15498; 29190; 26856; 15792; 0; 45846; 10192; 6277.4; 19444	8152.6; 20964; 14261; 16306; 0; 9427.7; 9848.6; 8582.5; 13148	4; 4; 3; 4; 2; 0; 1; 2; 2	3; 6; 6; 5; 5; 8; 6; 4; 5	3; 6; 6; 5; 5; 8; 6; 4; 5	3; 6; 6; 5; 5; 8; 6; 4; 5	5	By MS/MS; By MS/MS; By MS/MS; By MS/MS; By MS/MS; By MS/MS; By MS/MS; By matching; By MS/MS	7.8; 22.1; 19.5; 16.5; 15.8; 24.3; 20.2; 12.4; 19.1	21295; 32556; 23198; 38578; 87279; 49748; 19959; 19197; 14956	24434; 19235; 11634; 29327; 26980; 18454; 17759; 9764; 9028.2	1; 3; 3; 4; 2; 4; 5; 0; 3
alr0740	0.00112246	1	false	truth	0.32052	0.153645	0.104449	0.063267	0.2321	0.452237	4; 2; 3; 0; 2; 0; 1; 1; 1	4; 2; 3; 0; 2; 0; 1; 1; 1	4; 2; 3; 0; 2; 0; 1; 1; 1	1	By MS/MS; By matching; By matching; By matching; By matching; By matching; By matching; By matching; By matching	10; 5.1; 5.9; 0; 5.7; 0; 1.8; 2.8; 2.8	9402.9; 9138.3; 7744.2; 0; 4377.2; 0; 1657.1; 4335.6; 3484	7760.3; 9325.8; 7063.1; 0; 4429.1; 0; 0; 0; 0	2; 0; 0; 0; 0; 0; 0; 0; 0	3; 3; 5; 4; 2; 5; 8; 6; 7	3; 3; 5; 4; 2; 5; 8; 6; 7	3; 3; 5; 4; 2; 5; 8; 6; 7	5	By MS/MS; By MS/MS; By MS/MS; By MS/MS; By MS/MS; By MS/MS; By MS/MS; By MS/MS; By MS/MS	6.9; 6.9; 11.6; 9.8; 5.7; 11.4; 19.1; 15; 16.5	26254; 13611; 12573; 27935; 27005; 29973; 90664; 69482; 59432	28524; 19981; 11580; 14240; 21398; 18130; 43014; 18960; 30320	4; 3; 4; 3; 1; 4; 12; 1; 9
alr0782	0.337272	1	false	truth	0.809959	0.399272	0.295435	0.0803885	0.564653	1.19687	4; 4; 3; 5; 3; 3; 3; 3; 3	4; 4; 3; 5; 3; 3; 3; 3; 3	4; 4; 3; 5; 3; 3; 3; 3; 3	3	By MS/MS; By MS/MS; By MS/MS; By MS/MS; By MS/MS; By MS/MS; By MS/MS; By MS/MS; By MS/MS	26; 21.7; 16.2; 31.9; 22.1; 16.2; 21.7; 21.7; 18.3	21682; 11559; 18496; 25390; 13167; 11532; 8685.9; 9320.7; 18068	17027; 8960.2; 15151; 21594; 0; 15626; 0; 0; 24294	4; 2; 4; 7; 2; 1; 4; 4; 3	3; 4; 3; 4; 4; 4; 3; 3; 3	3; 4; 3; 4; 4; 4; 3; 3; 3	3; 4; 3; 4; 4; 4; 3; 3; 3	3	By MS/MS; By MS/MS; By MS/MS; By MS/MS; By MS/MS; By MS/MS; By MS/MS; By MS/MS; By MS/MS	20.4; 26; 14; 22.1; 22.1; 22.1; 21.7; 24.7; 20.4	16744; 34013; 5039.5; 32882; 23164; 35830; 9482.1; 21055; 24797	19128; 26460; 0; 9164; 23506; 21211; 0; 0; 25816	3; 8; 5; 2; 4; 3; 4; 2; 3
alr0867	0.420002	1	false	truth	1.16087	0.591508	0.351331	0.0264543	0.83495	1.54988	7; 4; 7; 8; 6; 5; 7; 6; 8	4; 3; 4; 5; 5; 4; 4; 5; 5	4; 3; 4; 5; 5; 4; 4; 5; 5	4	By MS/MS; By MS/MS; By MS/MS; By MS/MS; By MS/MS; By MS/MS; By MS/MS; By MS/MS; By MS/MS	79.8; 51.8; 80.7; 72.8; 68.4; 60.5; 72.8; 78.1; 90.4	16841; 12531; 37696; 127390; 112060; 97113; 123430; 167140; 145240	42164; 80795; 31971; 75231; 89364; 145280; 79394; 89379; 98420	2; 2; 1; 15; 7; 5; 7; 6; 6	6; 5; 4; 7; 6; 5; 8; 7; 7	5; 2; 3; 5; 4; 4; 5; 5; 4	5; 2; 3; 5; 4; 4; 5; 5; 4	4	By MS/MS; By MS/MS; By MS/MS; By MS/MS; By MS/MS; By MS/MS; By MS/MS; By MS/MS; By MS/MS	68.4; 56.1; 59.6; 65.8; 65.8; 60.5; 80.7; 75.4; 72.8	64434; 25567; 46035; 110980; 146990; 108170; 92577; 70832; 88646	59604; 66545; 0; 71238; 104300; 78806; 76706; 74847; 54446	4; 2; 2; 7; 6; 7; 8; 3; 5
alr0880	0.263228	1	false	truth	1.25237	0.480449	0.434284	0.0644094	0.881398	1.79577	4; 4; 5; 4; 2; 1; 2; 3; 4	4; 4; 5; 4; 2; 1; 2; 3; 4	4; 4; 5; 4; 2; 1; 2; 3; 4	4	By MS/MS; By MS/MS; By MS/MS; By MS/MS; By MS/MS; By matching; By MS/MS; By MS/MS; By MS/MS	9; 8.5; 11.1; 9.3; 4; 2.3; 4.3; 6.4; 8.7	22150; 10021; 43275; 6527.9; 6592.3; 0; 9666.7; 12634; 5897.5	15077; 12584; 18066; 11714; 0; 0; 0; 9596.4; 9733.2	1; 3; 1; 1; 0; 0; 1; 3; 7	1; 2; 2; 5; 4; 4; 2; 2; 2	1; 2; 2; 5; 4; 4; 2; 2; 2	1; 2; 2; 5; 4; 4; 2; 2; 2	2	By MS/MS; By MS/MS; By MS/MS; By MS/MS; By MS/MS; By MS/MS; By MS/MS; By matching; By MS/MS	2.3; 4.3; 4.3; 11.3; 8.3; 9; 5; 4.3; 5	0; 0; 8857.7; 15986; 29937; 0; 0; 10256; 7692.6	0; 0; 0; 10913; 10945; 0; 0; 0; 10745	0; 1; 0; 2; 1; 4; 1; 0; 3
alr0882	0.297671	1	false	truth	1.22481	0.647255	0.376677	0.0247003	0.873148	1.6385	8; 7; 6; 6; 9; 8; 11; 10; 9	8; 7; 6; 6; 9; 8; 11; 10; 9	8; 7; 6; 6; 9; 8; 11; 10; 9	8	By MS/MS; By MS/MS; By MS/MS; By MS/MS; By MS/MS; By MS/MS; By MS/MS; By MS/MS; By MS/MS	44.5; 35.3; 33.2; 35.7; 55.5; 46.3; 68.2; 59.4; 57.6	63272; 85799; 10289; 181860; 138740; 181740; 227640; 301010; 309360	56062; 66695; 23434; 68625; 57718; 95768; 139150; 132120; 128190	14; 13; 7; 22; 12; 12; 22; 27; 25	2; 6; 6; 10; 8; 8; 6; 6; 8	2; 6; 6; 10; 8; 8; 6; 6; 8	2; 6; 6; 10; 8; 8; 6; 6; 8	6	By MS/MS; By MS/MS; By MS/MS; By MS/MS; By MS/MS; By MS/MS; By MS/MS; By MS/MS; By MS/MS	11.3; 35.7; 33.2; 59.7; 48.4; 48.8; 34.3; 33.2; 48.4	55501; 64454; 43154; 179010; 214940; 206130; 78019; 104210; 122850	61754; 51126; 65291; 58383; 100640; 75268; 88839; 81942; 55672	3; 7; 5; 12; 8; 22; 15; 7; 18
alr0939	0.029838	1	false	truth	0	#N/A	#N/A	#N/A	#N/A	#N/A	2; 0; 2; 2; 0; 0; 0; 2; 0	2; 0; 2; 2; 0; 0; 0; 2; 0	2; 0; 2; 2; 0; 0; 0; 2; 0	0	By MS/MS; By matching; By MS/MS; By matching; By matching; By matching; By matching; By MS/MS; By matching	9.8; 0; 8.7; 8.1; 0; 0; 0; 7.4; 0	12271; 0; 6931.8; 19316; 0; 0; 0; 3692.3; 0	0; 0; 0; 0; 0; 0; 0; 0; 0	1; 0; 3; 0; 0; 0; 0; 3; 0	3; 0; 4; 4; 1; 1; 3; 0; 2	3; 0; 4; 4; 1; 1; 3; 0; 2	3; 0; 4; 4; 1; 1; 3; 0; 2	2	By matching; By matching; By MS/MS; By MS/MS; By matching; By MS/MS; By MS/MS; By matching; By MS/MS	12.5; 0; 17; 17.4; 4.5; 3.6; 12.3; 0; 8.3	14181; 0; 9196.4; 18892; 7233.2; 6216.1; 23369; 0; 9075.4	8623.6; 0; 0; 9169; 0; 0; 14455; 0; 0	0; 0; 2; 2; 0; 0; 3; 0; 1
alr0946	0.597361	1	false	truth	0.88247	0.628103	0.365531	0.0484808	0.550017	1.30485	5; 5; 6; 5; 3; 4; 5; 4; 3	5; 5; 6; 5; 3; 4; 5; 4; 3	5; 5; 6; 5; 3; 4; 5; 4; 3	5	By MS/MS; By MS/MS; By MS/MS; By MS/MS; By MS/MS; By MS/MS; By MS/MS; By MS/MS; By MS/MS	52.1; 51.4; 52.1; 43.1; 29.9; 39.6; 51.4; 43.1; 34	391130; 435250; 358590; 262680; 291310; 637620; 252030; 241220; 225880	123600; 136910; 102660; 98498; 118340; 415410; 217050; 305890; 224410	13; 13; 8; 9; 6; 5; 27; 13; 29	3; 4; 4; 4; 5; 3; 4; 4; 4	3; 4; 4; 4; 5; 3; 4; 4; 4	3; 4; 4; 4; 5; 3; 4; 4; 4	4	By MS/MS; By MS/MS; By MS/MS; By MS/MS; By MS/MS; By MS/MS; By MS/MS; By MS/MS; By MS/MS	31.2; 43.1; 43.1; 30.6; 39.6; 30.6; 43.1; 42.4; 43.1	93996; 250530; 171450; 624060; 620450; 316080; 260270; 546150; 251440	139680; 198170; 81716; 331570; 364400; 211580; 253300; 281470; 233050	8; 6; 7; 21; 13; 19; 24; 8; 12
alr1041	0.0421308	1	false	truth	1.81918	1.27613	0.83022	0.122908	1.15169	2.99651	7; 7; 7; 8; 7; 6; 8; 8; 8	7; 7; 7; 8; 7; 6; 8; 8; 8	7; 7; 7; 8; 7; 6; 8; 8; 8	7	By MS/MS; By MS/MS; By MS/MS; By MS/MS; By MS/MS; By MS/MS; By MS/MS; By MS/MS; By MS/MS	29.3; 29.3; 26.4; 31.6; 29.3; 25.8; 41.2; 41.4; 38	25581; 86697; 1864.6; 191990; 176470; 142240; 70835; 105150; 163450	36599; 44086; 0; 75862; 70358; 109980; 30198; 92072; 81113	3; 5; 3; 15; 7; 4; 11; 16; 10	6; 6; 5; 6; 6; 7; 9; 6; 6	6; 6; 5; 6; 6; 7; 9; 6; 6	6; 6; 5; 6; 6; 7; 9; 6; 6	6	By MS/MS; By MS/MS; By MS/MS; By MS/MS; By MS/MS; By MS/MS; By MS/MS; By MS/MS; By MS/MS	25.2; 25.2; 20.6; 25.8; 25.8; 29.3; 43.8; 25.8; 25.8	3482.6; 7765.3; 42250; 100300; 82792; 54300; 91816; 63638; 58991	0; 2998; 0; 70394; 57962; 22654; 55972; 42599; 38629	3; 0; 1; 6; 5; 2; 6; 0; 3
alr1050	0.00853356	1	false	truth	0.671122	0.214734	0.144653	0.0224437	0.539416	0.833644	5; 6; 4; 7; 4; 4; 4; 5; 5	5; 6; 4; 7; 4; 4; 4; 5; 5	5; 6; 4; 7; 4; 4; 4; 5; 5	5	By MS/MS; By MS/MS; By MS/MS; By MS/MS; By MS/MS; By matching; By MS/MS; By MS/MS; By MS/MS	13.4; 18; 9.7; 19.7; 12.1; 11.7; 11.9; 14.2; 16.7	6420.7; 30428; 11806; 56963; 13461; 20130; 46130; 19069; 6873.3	17814; 26234; 0; 30719; 16383; 18642; 0; 27342; 21499	2; 1; 1; 3; 2; 0; 2; 4; 6	3; 5; 4; 7; 8; 8; 7; 7; 6	3; 5; 4; 7; 8; 8; 7; 7; 6	3; 5; 4; 7; 8; 8; 7; 7; 6	7	By MS/MS; By MS/MS; By MS/MS; By MS/MS; By MS/MS; By MS/MS; By MS/MS; By MS/MS; By MS/MS	8.3; 14.6; 11.9; 21.8; 25.4; 23.3; 23.3; 21; 18.4	9868.2; 17135; 40590; 85464; 82922; 136570; 62310; 82443; 78464	0; 23326; 0; 46987; 37702; 34061; 32284; 37801; 42709	1; 3; 1; 5; 3; 4; 3; 1; 4
alr1073	0.928355	1	false	truth	1.01268	0.409354	0.243723	0.0191446	0.78556	1.27933	6; 5; 3; 3; 3; 6; 5; 6; 5	6; 5; 3; 3; 3; 6; 5; 6; 5	6; 5; 3; 3; 3; 6; 5; 6; 5	5	By MS/MS; By MS/MS; By MS/MS; By MS/MS; By MS/MS; By MS/MS; By MS/MS; By MS/MS; By matching	8.4; 6.9; 4.6; 4.2; 4.5; 9; 7.4; 9.3; 7.5	29609; 42487; 41458; 25929; 53801; 64938; 17123; 52357; 12958	35031; 25530; 32790; 20466; 27997; 17704; 30385; 21967; 9498.6	5; 2; 4; 3; 2; 0; 4; 1; 0	4; 6; 5; 5; 7; 9; 7; 1; 6	4; 6; 5; 5; 7; 9; 7; 1; 6	4; 6; 5; 5; 7; 9; 7; 1; 6	6	By matching; By MS/MS; By MS/MS; By MS/MS; By MS/MS; By MS/MS; By MS/MS; By matching; By MS/MS	5.8; 8.8; 7; 7.6; 10.5; 12.3; 10.3; 1.4; 8.6	35646; 50509; 51196; 67784; 42256; 48137; 71754; 7627.5; 27672	19293; 18408; 25158; 49957; 17486; 22257; 34520; 0; 23578	0; 4; 2; 4; 3; 7; 7; 0; 4
alr1077	0.0478711	1	false	truth	1.60442	0.823507	0.660344	0.131106	1.09787	2.59514	2; 3; 4; 2; 3; 2; 1; 2; 2	2; 3; 4; 2; 3; 2; 1; 2; 2	2; 3; 4; 2; 3; 2; 1; 2; 2	2	By MS/MS; By MS/MS; By MS/MS; By MS/MS; By MS/MS; By MS/MS; By MS/MS; By MS/MS; By MS/MS	11.7; 16.9; 24.2; 11.7; 16.9; 11.7; 5.2; 11.7; 17.7	3727.9; 32103; 16949; 21309; 21729; 20221; 8758; 0; 10104	0; 21369; 11117; 11867; 11139; 8873.9; 0; 0; 12201	5; 6; 6; 3; 3; 1; 1; 2; 4	2; 4; 2; 1; 1; 4; 2; 2; 2	2; 4; 2; 1; 1; 4; 2; 2; 2	2; 4; 2; 1; 1; 4; 2; 2; 2	2	By MS/MS; By MS/MS; By MS/MS; By MS/MS; By matching; By MS/MS; By MS/MS; By MS/MS; By MS/MS	11.7; 24.2; 14.5; 5.2; 6.5; 30.2; 11.7; 16.1; 11.7	6318.9; 12146; 5984.4; 14526; 1609.8; 4775.1; 5627.9; 32254; 10120	4487.9; 9167.7; 8438.2; 0; 0; 0; 4637.4; 0; 11611	2; 3; 2; 1; 0; 1; 2; 1; 3
alr1078	0.649366	1	false	truth	1.15815	0.766821	0.682193	0.282941	0.688928	2.54135	4; 2; 5; 3; 5; 3; 5; 4; 3	4; 2; 5; 3; 5; 3; 5; 4; 3	4; 2; 5; 3; 5; 3; 5; 4; 3	4	By MS/MS; By MS/MS; By MS/MS; By MS/MS; By MS/MS; By matching; By MS/MS; By MS/MS; By MS/MS	19.3; 8.5; 27.2; 18; 24.9; 10.8; 23; 23.6; 16.7	4886.7; 13642; 13871; 12700; 3656.9; 18846; 16561; 8185.3; 12132	0; 9832.7; 14036; 0; 0; 11649; 9275.4; 5800.8; 10214	2; 0; 1; 4; 4; 0; 3; 3; 3	2; 1; 1; 4; 2; 2; 4; 2; 3	2; 1; 1; 4; 2; 2; 4; 2; 3	2; 1; 1; 4; 2; 2; 4; 2; 3	2	By matching; By matching; By matching; By MS/MS; By MS/MS; By MS/MS; By MS/MS; By MS/MS; By MS/MS	6.9; 7.5; 3.6; 18.4; 11.5; 9.2; 20.3; 11.5; 15.7	9391.5; 0; 7744.1; 23642; 1778.6; 5617.9; 12544; 1474.2; 6940.8	0; 0; 0; 10590; 0; 6020.1; 7445.8; 0; 15062	0; 0; 0; 3; 0; 1; 1; 0; 1
alr1080	0.528749	1	false	truth	0.906523	0.392885	0.244656	0.0283541	0.683371	1.18258	2; 3; 3; 5; 6; 4; 5; 3; 6	2; 3; 3; 5; 6; 4; 5; 3; 6	2; 3; 3; 5; 6; 4; 5; 3; 6	4	By MS/MS; By MS/MS; By MS/MS; By MS/MS; By MS/MS; By MS/MS; By MS/MS; By MS/MS; By MS/MS	7.5; 12.6; 12.2; 20.4; 21.1; 14.5; 20.8; 12.2; 25.8	13089; 18456; 5183.3; 24015; 13665; 31462; 22753; 16910; 38001	0; 17859; 10271; 14403; 11576; 14655; 29272; 26893; 22355	3; 3; 2; 4; 3; 1; 4; 2; 6	2; 5; 3; 4; 3; 8; 3; 3; 6	2; 5; 3; 4; 3; 8; 3; 3; 6	2; 5; 3; 4; 3; 8; 3; 3; 6	3	By MS/MS; By MS/MS; By MS/MS; By MS/MS; By MS/MS; By MS/MS; By MS/MS; By MS/MS; By MS/MS	8.9; 18.3; 9.1; 13.3; 11.7; 30.7; 9.6; 12.6; 22.7	14908; 33613; 11975; 18798; 24723; 46082; 41928; 13338; 51409	0; 16266; 21833; 14925; 16142; 25032; 34298; 19657; 21442	2; 6; 3; 2; 2; 7; 5; 2; 7
alr1129	0.636079	1	false	truth	0.875947	0.507706	0.407975	0.172679	0.57441	1.54314	1; 1; 4; 2; 2; 2; 2; 2; 3	1; 1; 4; 2; 2; 2; 2; 2; 3	1; 1; 4; 2; 2; 2; 2; 2; 3	2	By MS/MS; By matching; By MS/MS; By MS/MS; By MS/MS; By matching; By MS/MS; By MS/MS; By MS/MS	3.4; 3.4; 16; 6.5; 6.5; 6.5; 6.5; 6.8; 9.8	20910; 7080.4; 47150; 41910; 35527; 49717; 0; 21073; 49813	0; 0; 21610; 34659; 19910; 24766; 0; 13424; 26600	1; 0; 1; 2; 1; 0; 2; 1; 3	2; 1; 2; 1; 2; 2; 3; 3; 3	2; 1; 2; 1; 2; 2; 3; 3; 3	2; 1; 2; 1; 2; 2; 3; 3; 3	2	By MS/MS; By matching; By matching; By MS/MS; By matching; By MS/MS; By MS/MS; By MS/MS; By MS/MS	6.5; 3.1; 9.5; 3.1; 6.5; 6.5; 12.6; 9.8; 9.8	38241; 8371.3; 23019; 17792; 9814.3; 0; 6086.6; 84435; 58161	33447; 0; 21515; 0; 6765.9; 0; 0; 46038; 26408	1; 0; 0; 1; 0; 2; 2; 1; 2
alr1143	0.0239433	1	false	truth	0.514149	0.295969	0.218998	0.0738594	0.323925	0.786379	2; 1; 0; 2; 2; 2; 2; 2; 4	2; 1; 0; 2; 2; 2; 2; 2; 4	2; 1; 0; 2; 2; 2; 2; 2; 4	2	By MS/MS; By MS/MS; By matching; By MS/MS; By MS/MS; By MS/MS; By MS/MS; By MS/MS; By MS/MS	21.8; 11.4; 0; 21.2; 20.2; 21.8; 20.2; 21.2; 44.6	9450.1; 6020.5; 0; 8061.9; 11313; 19229; 5890.5; 14046; 10714	4015.7; 0; 0; 0; 7504.6; 10301; 4883.3; 5724.3; 4694.8	1; 1; 0; 3; 2; 2; 2; 1; 4	0; 1; 2; 3; 2; 3; 2; 2; 2	0; 1; 2; 3; 2; 3; 2; 2; 2	0; 1; 2; 3; 2; 3; 2; 2; 2	2	By matching; By matching; By MS/MS; By MS/MS; By MS/MS; By MS/MS; By MS/MS; By matching; By MS/MS	0; 10.4; 20.2; 34.2; 20.2; 34.7; 20.2; 20.2; 21.2	0; 1710.4; 2028.4; 36275; 1909.9; 21434; 3040.8; 21889; 22809	0; 6273.4; 7143.3; 17878; 0; 14627; 0; 18509; 15371	0; 0; 1; 4; 2; 4; 2; 0; 3
alr1144	0.024266	1	false	false	0.527993	0.134345	0.185596	0.0121179	0.347627	0.721313	2; 2; 3; 1; 0; 1; 2; 0; 0	2; 2; 3; 1; 0; 1; 2; 0; 0	2; 2; 3; 1; 0; 1; 2; 0; 0	1	By MS/MS; By MS/MS; By MS/MS; By MS/MS; By matching; By MS/MS; By MS/MS; By matching; By matching	10.7; 10.7; 16.6; 5.2; 0; 5.9; 10.7; 0; 0	15087; 11077; 11672; 8440.5; 0; 1502.8; 11460; 0; 0	10340; 0; 9175.2; 0; 0; 0; 7303; 0; 0	1; 3; 2; 1; 0; 1; 1; 0; 0	1; 2; 0; 0; 1; 1; 2; 0; 2	1; 2; 0; 0; 1; 1; 2; 0; 2	1; 2; 0; 0; 1; 1; 2; 0; 2	1	By MS/MS; By MS/MS; By matching; By matching; By matching; By matching; By MS/MS; By matching; By MS/MS	5.2; 10.7; 0; 0; 5.5; 5.2; 10.7; 0; 11.4	0; 17123; 0; 0; 2623.9; 35233; 9185.9; 0; 19269	0; 16572; 0; 0; 0; 0; 0; 0; 14904	1; 2; 0; 0; 0; 0; 2; 0; 2
alr1208	0.291766	1	false	truth	0.71727	0.578164	0.371605	0.142417	0.417804	1.25497	1; 3; 3; 4; 3; 3; 1; 2; 3	1; 3; 3; 4; 3; 3; 1; 2; 3	1; 3; 3; 4; 3; 3; 1; 2; 3	3	By MS/MS; By MS/MS; By MS/MS; By MS/MS; By MS/MS; By MS/MS; By MS/MS; By MS/MS; By MS/MS	10.4; 22; 28.6; 33; 22; 26.9; 7.1; 17.6; 28.6	19139; 15808; 76941; 101090; 73166; 45238; 11525; 50807; 8140.6	0; 0; 39958; 51999; 66417; 48808; 0; 33106; 7725.6	3; 8; 5; 8; 4; 1; 1; 2; 3	4; 2; 4; 3; 2; 3; 3; 2; 3	4; 2; 4; 3; 2; 3; 3; 2; 3	4; 2; 4; 3; 2; 3; 3; 2; 3	3	By MS/MS; By MS/MS; By MS/MS; By MS/MS; By MS/MS; By MS/MS; By MS/MS; By MS/MS; By MS/MS	33; 21.4; 34.1; 25.8; 21.4; 28.6; 28.6; 17.6; 28.6	55056; 28893; 59940; 130600; 122360; 219510; 137200; 96805; 81045	43168; 27383; 27145; 57262; 141340; 82209; 48794; 87620; 49327	4; 3; 5; 3; 3; 5; 4; 2; 4
alr1216	0.792824	1	false	truth	1.04763	0.54735	0.318537	0.0465123	0.76854	1.42892	6; 3; 4; 4; 4; 4; 4; 2; 2	6; 3; 4; 4; 4; 4; 4; 2; 2	6; 3; 4; 4; 4; 4; 4; 2; 2	4	By MS/MS; By MS/MS; By MS/MS; By MS/MS; By MS/MS; By MS/MS; By MS/MS; By MS/MS; By MS/MS	47; 30.2; 40.9; 31.5; 31.5; 34.9; 30.9; 15.4; 25.5	241140; 99899; 252030; 136600; 126460; 367690; 180780; 180070; 184390	158200; 69912; 179460; 105790; 105140; 205470; 106400; 172000; 153320	7; 5; 6; 6; 5; 6; 5; 3; 4	4; 4; 3; 1; 3; 4; 5; 3; 3	4; 4; 3; 1; 3; 4; 5; 3; 3	4; 4; 3; 1; 3; 4; 5; 3; 3	3	By MS/MS; By MS/MS; By MS/MS; By MS/MS; By MS/MS; By MS/MS; By MS/MS; By MS/MS; By MS/MS	36.2; 36.2; 30.2; 15.4; 21.5; 34.9; 40.9; 34.9; 34.9	150610; 136650; 189730; 150060; 125510; 372420; 426140; 240330; 303830	111670; 69933; 125250; 126780; 114330; 166180; 277180; 109580; 181750	5; 2; 5; 2; 2; 9; 10; 4; 6
alr1223	0.170243	1	false	truth	0.672247	0.407461	0.319772	0.10981	0.406253	1.10409	4; 1; 1; 1; 1; 1; 4; 3; 2	4; 1; 1; 1; 1; 1; 4; 3; 2	4; 1; 1; 1; 1; 1; 4; 3; 2	1	By MS/MS; By MS/MS; By MS/MS; By matching; By matching; By matching; By MS/MS; By MS/MS; By MS/MS	10.9; 2.7; 2.7; 2.3; 2.1; 2.1; 10.5; 8.6; 6.4	19516; 5597.1; 7135; 3404.1; 1923.5; 6727.9; 5093.7; 3613.7; 2899.8	10509; 0; 0; 0; 0; 0; 6230.5; 6197.7; 4857.3	3; 1; 2; 0; 0; 0; 4; 4; 5	2; 1; 3; 4; 4; 4; 3; 4; 3	2; 1; 3; 4; 4; 4; 3; 4; 3	2; 1; 3; 4; 4; 4; 3; 4; 3	3	By MS/MS; By MS/MS; By MS/MS; By MS/MS; By MS/MS; By MS/MS; By MS/MS; By matching; By MS/MS	4.7; 2.7; 9; 10.7; 10.7; 10.9; 8.6; 10.5; 6.8	7107.5; 4403.2; 16199; 22473; 23271; 26897; 11272; 16005; 13092	0; 0; 18666; 11797; 12281; 9651.3; 6213.2; 7881.8; 7461.5	1; 3; 1; 4; 1; 6; 6; 0; 3
alr1238	0.0337818	1	false	truth	0.632083	0.220298	0.168001	0.0549588	0.492159	0.845525	5; 3; 5; 2; 3; 2; 1; 4; 3	5; 3; 5; 2; 3; 2; 1; 4; 3	5; 3; 5; 2; 3; 2; 1; 4; 3	3	By MS/MS; By MS/MS; By MS/MS; By MS/MS; By MS/MS; By MS/MS; By MS/MS; By MS/MS; By MS/MS	33.8; 21.1; 28.4; 10.8; 15.7; 17.6; 5.4; 28.4; 21.1	37114; 0; 23668; 36838; 26329; 27059; 9506.3; 16359; 12576	20169; 0; 17581; 17370; 14486; 0; 0; 13137; 0	4; 1; 1; 2; 0; 1; 1; 1; 2	4; 4; 4; 4; 4; 5; 4; 5; 4	4; 4; 4; 4; 4; 5; 4; 5; 4	4; 4; 4; 4; 4; 5; 4; 5; 4	4	By MS/MS; By MS/MS; By MS/MS; By MS/MS; By MS/MS; By MS/MS; By MS/MS; By MS/MS; By MS/MS	26.5; 23; 28.4; 28.4; 33.8; 33.8; 26.5; 33.8; 26.5	14018; 33037; 27303; 2237.1; 15686; 71445; 28372; 27833; 15003	10737; 23284; 31457; 0; 24272; 40457; 0; 32831; 0	3; 2; 3; 1; 0; 5; 3; 2; 3
alr1240	0.289246	1	false	truth	1.2671	0.470907	0.514722	0.0992446	0.846692	1.96673	2; 2; 4; 5; 3; 3; 4; 4; 3	2; 2; 4; 5; 3; 3; 4; 4; 3	2; 2; 4; 5; 3; 3; 4; 4; 3	3	By MS/MS; By MS/MS; By MS/MS; By MS/MS; By MS/MS; By MS/MS; By MS/MS; By MS/MS; By MS/MS	4.9; 4.9; 5.5; 9.7; 6.6; 5.2; 8.8; 8.9; 7.5	4591.2; 2906.5; 13462; 3815.5; 6106.4; 36176; 21235; 7856.8; 15355	0; 0; 10198; 0; 0; 15120; 15550; 8549.4; 0	1; 1; 2; 4; 1; 0; 4; 2; 2	3; 2; 1; 4; 2; 3; 3; 6; 6	3; 2; 1; 4; 2; 3; 3; 6; 6	3; 2; 1; 4; 2; 3; 3; 6; 6	3	By matching; By matching; By matching; By MS/MS; By MS/MS; By MS/MS; By MS/MS; By MS/MS; By MS/MS	5.1; 4.6; 2.4; 9.3; 6; 7.5; 5.2; 11.5; 10.3	6349.9; 5258.7; 0; 18680; 0; 12887; 12051; 25647; 19461	0; 0; 0; 0; 0; 0; 8152.5; 12109; 10545	0; 0; 0; 2; 1; 3; 1; 0; 1
alr1247	0.292818	1	false	truth	1.42703	0.803367	0.733741	0.0800939	0.776233	2.32632	2; 3; 2; 2; 1; 2; 2; 0; 2	2; 3; 2; 2; 1; 2; 2; 0; 2	2; 3; 2; 2; 1; 2; 2; 0; 2	2	By MS/MS; By MS/MS; By MS/MS; By MS/MS; By MS/MS; By matching; By MS/MS; By matching; By MS/MS	12.2; 15.7; 8.4; 10.8; 7.3; 10.8; 8.4; 0; 8.4	9740.6; 15593; 22463; 7569.8; 10782; 10235; 13734; 0; 17167	0; 6728.6; 16302; 0; 8902.3; 0; 0; 0; 10975	2; 3; 2; 2; 1; 0; 4; 0; 4	2; 1; 2; 2; 1; 1; 3; 1; 2	2; 1; 2; 2; 1; 1; 3; 1; 2	2; 1; 2; 2; 1; 1; 3; 1; 2	2	By MS/MS; By MS/MS; By matching; By matching; By MS/MS; By MS/MS; By MS/MS; By MS/MS; By MS/MS	12.2; 3.5; 10.8; 12.2; 4.9; 4.9; 15.7; 4.9; 10.8	12398; 10500; 19640; 15179; 11042; 12494; 28487; 14967; 9843.6	9373.1; 0; 8718.7; 5222.4; 0; 0; 9049.8; 0; 7451.5	1; 1; 0; 0; 0; 1; 4; 0; 2
alr1261	0.710534	1	false	truth	0.963503	0.27984	0.162856	0.0221409	0.819191	1.15145	11; 10; 9; 8; 11; 10; 7; 9; 8	11; 10; 9; 8; 11; 10; 7; 8; 8	11; 10; 9; 8; 11; 10; 7; 8; 8	9	By MS/MS; By MS/MS; By MS/MS; By MS/MS; By MS/MS; By MS/MS; By MS/MS; By MS/MS; By MS/MS	31.2; 25.4; 24.1; 22.2; 29.7; 23.7; 19.6; 26.6; 22.3	137700; 127220; 124420; 47134; 151000; 132940; 100110; 86208; 80047	60053; 65407; 65004; 68602; 83994; 56729; 81564; 63539; 74746	17; 10; 10; 13; 8; 4; 9; 7; 10	9; 7; 7; 10; 12; 10; 9; 9; 10	9; 7; 7; 10; 12; 9; 9; 8; 10	9; 7; 7; 10; 12; 9; 9; 8; 10	9	By MS/MS; By MS/MS; By MS/MS; By MS/MS; By MS/MS; By MS/MS; By MS/MS; By MS/MS; By MS/MS	24.8; 17.1; 19.4; 27.1; 33.3; 25.4; 26.3; 23.8; 28.9	77765; 81286; 75074; 158560; 223870; 197190; 60469; 83962; 104230	65027; 51086; 55057; 114450; 98270; 99315; 59729; 62654; 70315	11; 9; 9; 20; 16; 13; 12; 2; 7
alr1310	0.391114	1	false	truth	0.898822	0.262971	0.193539	0.0216807	0.722058	1.11542	2; 4; 4; 3; 3; 3; 6; 4; 4	2; 4; 4; 3; 3; 3; 6; 4; 4	2; 4; 4; 3; 3; 3; 6; 4; 4	4	By MS/MS; By MS/MS; By MS/MS; By MS/MS; By MS/MS; By MS/MS; By MS/MS; By MS/MS; By MS/MS	3.5; 6.9; 7; 4.8; 5.1; 5.1; 10.6; 7.7; 7.4	27314; 50205; 18078; 24923; 27876; 21828; 26562; 16778; 20763	22698; 19515; 0; 0; 16428; 14982; 16460; 14635; 10435	3; 4; 4; 6; 2; 2; 7; 6; 4	1; 3; 1; 2; 2; 3; 2; 2; 2	1; 3; 1; 2; 2; 3; 2; 2; 2	1; 3; 1; 2; 2; 3; 2; 2; 2	2	By MS/MS; By MS/MS; By MS/MS; By MS/MS; By MS/MS; By MS/MS; By MS/MS; By MS/MS; By MS/MS	1.7; 4.7; 1.7; 3.8; 3.8; 5.1; 3.4; 3.8; 3.5	15184; 23579; 0; 23613; 24166; 30126; 16288; 42444; 20278	0; 17883; 0; 18935; 20243; 18808; 0; 20504; 0	1; 2; 1; 2; 1; 2; 2; 1; 1
alr1313	0.721857	1	false	truth	1.09198	0.52117	0.506364	0.169147	0.715942	1.91265	4; 6; 5; 5; 4; 2; 4; 7; 6	4; 6; 5; 5; 4; 2; 4; 7; 6	4; 6; 5; 5; 4; 2; 4; 7; 6	5	By MS/MS; By MS/MS; By MS/MS; By MS/MS; By MS/MS; By matching; By MS/MS; By MS/MS; By MS/MS	12.2; 23.8; 24; 28.5; 21; 8; 19.6; 30.7; 26	27725; 26554; 12600; 8961.7; 5946.7; 2243.7; 3821.3; 8047.6; 16935	13975; 16007; 16181; 0; 0; 0; 0; 9913.7; 0	1; 0; 3; 5; 1; 0; 2; 5; 4	3; 5; 4; 4; 6; 4; 3; 3; 6	3; 5; 4; 4; 6; 4; 3; 3; 6	3; 5; 4; 4; 6; 4; 3; 3; 6	4	By MS/MS; By MS/MS; By MS/MS; By MS/MS; By MS/MS; By MS/MS; By MS/MS; By matching; By MS/MS	16; 19.9; 16; 18.8; 22.7; 15.7; 11.3; 11.3; 26.2	5206.7; 22980; 31320; 12312; 20362; 13732; 8425.9; 8138.5; 10685	0; 12123; 19699; 0; 9846; 0; 0; 0; 7153	0; 0; 0; 1; 0; 0; 0; 0; 1
alr1346	0.566463	1	false	truth	0.885088	0.420631	0.331018	0.0456118	0.585922	1.26885	3; 0; 5; 3; 4; 3; 4; 0; 1	3; 0; 5; 3; 4; 3; 4; 0; 1	3; 0; 5; 3; 4; 3; 4; 0; 1	3	By MS/MS; By matching; By MS/MS; By MS/MS; By MS/MS; By matching; By MS/MS; By matching; By MS/MS	11; 0; 21.4; 13.8; 16.2; 12.5; 20.2; 0; 4	11897; 0; 25504; 11400; 47971; 40356; 15706; 0; 7054.3	111320; 0; 75926; 0; 58492; 46661; 0; 0; 0	3; 0; 3; 0; 0; 0; 3; 0; 1	3; 2; 3; 3; 2; 3; 5; 3; 5	3; 2; 3; 3; 2; 3; 5; 3; 5	3; 2; 3; 3; 2; 3; 5; 3; 5	3	By MS/MS; By MS/MS; By MS/MS; By matching; By matching; By matching; By MS/MS; By matching; By MS/MS	12.2; 8.3; 12.2; 13.1; 8.3; 15; 20.2; 14.7; 19.6	205020; 103110; 81975; 868590; 493490; 87650; 53270; 26321; 41614	103510; 0; 73881; 122880; 129800; 72510; 97705; 84115; 44881	1; 2; 2; 0; 0; 0; 3; 0; 2
alr1348	0.11161	1	false	truth	1.32751	0.690897	0.402075	0.0608658	0.989823	1.83728	7; 8; 13; 8; 8; 14; 7; 6; 9	7; 8; 13; 8; 8; 14; 7; 6; 9	7; 8; 13; 8; 8; 14; 7; 6; 9	8	By MS/MS; By MS/MS; By MS/MS; By MS/MS; By MS/MS; By MS/MS; By MS/MS; By MS/MS; By MS/MS	16.2; 20.5; 32.6; 18; 21.5; 29.4; 16.2; 14.5; 24.8	28953; 60582; 70435; 100390; 88033; 173390; 73599; 48037; 29540	29727; 43719; 43027; 55551; 57614; 36521; 44827; 74647; 46313	10; 11; 14; 10; 7; 4; 14; 11; 16	7; 11; 9; 7; 7; 8; 11; 8; 12	7; 11; 9; 7; 7; 8; 11; 8; 12	7; 11; 9; 7; 7; 8; 11; 8; 12	8	By MS/MS; By MS/MS; By MS/MS; By MS/MS; By MS/MS; By MS/MS; By MS/MS; By MS/MS; By MS/MS	16; 26.3; 21.5; 14.8; 18.5; 19.5; 26.9; 17.1; 27.7	61510; 60346; 47322; 52970; 106560; 122650; 84672; 44797; 60047	40467; 29104; 30374; 37733; 62445; 55132; 43183; 26125; 15001	6; 9; 8; 12; 7; 7; 13; 3; 10
alr1381	0.251112	1	false	truth	1.20132	0.513321	0.319925	0.0349804	0.916298	1.57344	2; 2; 3; 2; 1; 6; 6; 7; 5	2; 2; 3; 2; 1; 6; 6; 7; 5	2; 2; 3; 2; 1; 6; 6; 7; 5	3	By MS/MS; By MS/MS; By MS/MS; By MS/MS; By matching; By matching; By MS/MS; By MS/MS; By MS/MS	5.9; 4.8; 6.8; 3.5; 1.8; 13.3; 12.2; 16.8; 10.4	9728.3; 16301; 26777; 12950; 2961; 27721; 35021; 30913; 30772	0; 22892; 20834; 15490; 0; 7946.2; 19800; 16660; 24097	0; 1; 3; 1; 0; 0; 5; 4; 6	3; 4; 2; 4; 6; 8; 7; 4; 5	3; 4; 2; 4; 6; 8; 7; 4; 5	3; 4; 2; 4; 6; 8; 7; 4; 5	4	By MS/MS; By MS/MS; By MS/MS; By MS/MS; By MS/MS; By MS/MS; By MS/MS; By matching; By MS/MS	6.5; 10.9; 4.8; 7.9; 13.6; 20.7; 17.5; 8.3; 13	12852; 28960; 10321; 18458; 52512; 30529; 42309; 13630; 24388	18217; 21146; 15084; 9589.7; 14846; 14609; 19670; 12452; 11303	1; 1; 1; 2; 3; 3; 6; 0; 2
alr1396	0.0173805	1	false	truth	0.706965	0.233907	0.138726	0.0283749	0.585367	0.869855	6; 6; 6; 4; 4; 5; 6; 5; 5	6; 6; 6; 4; 4; 5; 6; 5; 5	6; 6; 6; 4; 4; 5; 6; 5; 5	5	By MS/MS; By MS/MS; By MS/MS; By MS/MS; By MS/MS; By MS/MS; By MS/MS; By MS/MS; By MS/MS	21.8; 23.2; 18.9; 14.9; 15.7; 16.7; 20.8; 20; 17.5	44974; 38952; 42262; 35018; 14312; 41104; 39217; 28519; 26426	23064; 24691; 22917; 20571; 0; 20436; 18366; 19527; 16027	10; 6; 9; 4; 3; 1; 10; 7; 7	4; 6; 5; 4; 4; 5; 6; 4; 4	4; 6; 5; 4; 4; 5; 6; 4; 4	4; 6; 5; 4; 4; 5; 6; 4; 4	4	By MS/MS; By MS/MS; By MS/MS; By MS/MS; By MS/MS; By MS/MS; By MS/MS; By MS/MS; By MS/MS	11.2; 23.2; 17.1; 16.7; 16.5; 18.3; 19.3; 13.8; 14.9	39611; 57738; 43296; 72805; 73043; 82963; 38480; 41143; 20084	26840; 24195; 19637; 43691; 44819; 36129; 24849; 25266; 28576	2; 6; 8; 4; 2; 9; 13; 2; 8
alr1414	0.219742	1	false	truth	0.639319	0.506409	0.399714	0.153879	0.305759	1.20542	3; 3; 5; 3; 2; 5; 2; 2; 4	3; 3; 5; 3; 2; 5; 2; 2; 4	3; 3; 5; 3; 2; 5; 2; 2; 4	3	By MS/MS; By MS/MS; By MS/MS; By MS/MS; By MS/MS; By MS/MS; By MS/MS; By MS/MS; By matching	10.1; 12.7; 17.2; 11.5; 7.8; 15.3; 8.9; 9.2; 15.1	6694.9; 15819; 26370; 55119; 20817; 38705; 0; 18056; 22273	0; 0; 20714; 41881; 0; 19277; 0; 9910.1; 11804	2; 1; 3; 1; 0; 2; 1; 0; 0	4; 3; 4; 3; 5; 3; 3; 5; 6	4; 3; 4; 3; 5; 3; 3; 5; 6	4; 3; 4; 3; 5; 3; 3; 5; 6	4	By MS/MS; By MS/MS; By MS/MS; By MS/MS; By MS/MS; By MS/MS; By MS/MS; By MS/MS; By MS/MS	16.7; 10.1; 15.1; 10.1; 27.8; 12.7; 12.7; 25.2; 22.1	19852; 27089; 25151; 57243; 142150; 89476; 0; 24671; 81870	0; 30444; 20533; 22232; 47148; 0; 0; 24007; 55029	1; 2; 1; 1; 4; 2; 1; 1; 5
alr1524	0.417585	1	false	truth	1.17173	0.657398	0.38258	0.0459275	0.832409	1.62385	15; 10; 15; 12; 15; 13; 11; 13; 11	15; 10; 15; 12; 15; 13; 11; 13; 11	15; 10; 15; 12; 15; 13; 11; 13; 11	13	By MS/MS; By MS/MS; By MS/MS; By MS/MS; By MS/MS; By MS/MS; By MS/MS; By MS/MS; By MS/MS	41.4; 23.1; 37.4; 30; 33.8; 27.3; 24.4; 31.3; 26.1	365390; 313310; 345340; 612920; 622080; 1632300; 763740; 723350; 687360	413960; 395200; 267690; 521610; 544430; 870080; 409000; 359270; 387180	32; 12; 38; 48; 20; 7; 29; 24; 27	9; 12; 14; 15; 9; 13; 13; 12; 16	9; 12; 14; 15; 9; 13; 13; 12; 16	9; 12; 14; 15; 9; 13; 13; 12; 16	13	By MS/MS; By MS/MS; By MS/MS; By MS/MS; By MS/MS; By MS/MS; By MS/MS; By MS/MS; By MS/MS	22.9; 27.9; 31.3; 37.4; 23.3; 34.2; 31.1; 31.7; 33.8	219250; 233570; 387870; 830620; 872010; 721140; 1079000; 1166200; 1156400	228180; 242600; 325090; 310330; 371190; 447030; 659870; 616960; 551960	9; 21; 15; 13; 6; 16; 26; 14; 18
alr1526	0.213566	1	false	truth	1.3752	0.919073	0.534865	0.043871	0.887673	1.98892	3; 2; 4; 4; 4; 4; 3; 4; 3	3; 2; 4; 4; 4; 4; 3; 4; 3	3; 2; 4; 4; 4; 4; 3; 4; 3	4	By MS/MS; By MS/MS; By MS/MS; By MS/MS; By MS/MS; By MS/MS; By MS/MS; By MS/MS; By MS/MS	25.7; 16.5; 38.5; 38.5; 38.5; 38.5; 25.7; 38.5; 25.7	230230; 81780; 195470; 602990; 681550; 468250; 458590; 459090; 728140	88421; 66817; 94292; 344980; 424490; 248540; 388120; 425630; 420250	9; 3; 4; 13; 13; 6; 11; 15; 14	4; 3; 3; 4; 3; 4; 4; 4; 4	4; 3; 3; 4; 3; 4; 4; 4; 4	4; 3; 3; 4; 3; 4; 4; 4; 4	4	By MS/MS; By MS/MS; By MS/MS; By MS/MS; By MS/MS; By MS/MS; By MS/MS; By MS/MS; By MS/MS	38.5; 29.4; 25.7; 32.1; 25.7; 38.5; 38.5; 38.5; 38.5	303380; 87033; 374930; 382390; 391150; 368550; 563590; 523460; 294250	174690; 120050; 88897; 208150; 218530; 221890; 320110; 342430; 222120	12; 6; 5; 5; 5; 10; 13; 9; 11
alr1533	0.296544	1	false	truth	0.796776	0.440023	0.264896	0.0977726	0.591181	1.17506	4; 5; 5; 4; 2; 4; 1; 5; 4	4; 5; 5; 4; 2; 4; 1; 5; 4	4; 5; 5; 4; 2; 4; 1; 5; 4	4	By MS/MS; By MS/MS; By MS/MS; By MS/MS; By MS/MS; By MS/MS; By MS/MS; By MS/MS; By MS/MS	15; 16.2; 15.5; 15.9; 4.8; 14.5; 4.6; 21.5; 15.9	10288; 40371; 24971; 36578; 13932; 49409; 9435.3; 24697; 34472	0; 26607; 20863; 30191; 0; 20761; 0; 20259; 20534	3; 3; 5; 3; 0; 3; 1; 3; 4	6; 5; 6; 5; 4; 6; 6; 3; 6	6; 5; 6; 5; 4; 6; 6; 3; 6	6; 5; 6; 5; 4; 6; 6; 3; 6	6	By MS/MS; By MS/MS; By MS/MS; By MS/MS; By MS/MS; By MS/MS; By MS/MS; By MS/MS; By MS/MS	20.8; 15.5; 21.3; 19.8; 17.4; 21.3; 20.8; 10.9; 20.8	32990; 43979; 36235; 32781; 51143; 52902; 78329; 47246; 72620	20527; 23975; 10141; 24244; 23265; 35518; 36112; 39102; 60708	3; 3; 1; 4; 3; 6; 6; 3; 8
alr1554	0.58516	1	false	truth	0.850381	0.613534	0.427049	0.175302	0.527345	1.53494	1; 2; 2; 3; 2; 1; 2; 3; 1	1; 2; 2; 3; 2; 1; 2; 3; 1	1; 2; 2; 3; 2; 1; 2; 3; 1	2	By matching; By matching; By matching; By matching; By matching; By matching; By matching; By matching; By matching	2.6; 5.4; 4.6; 6.9; 5.3; 2.6; 4.8; 7.4; 2.6	13013; 15612; 28095; 13678; 2852.4; 20414; 5620.2; 11934; 10478	11935; 0; 15952; 8189.6; 0; 0; 0; 13551; 0	0; 0; 0; 0; 0; 0; 0; 0; 0	4; 2; 1; 4; 4; 3; 1; 2; 2	4; 2; 1; 4; 4; 3; 1; 2; 2	4; 2; 1; 4; 4; 3; 1; 2; 2	2	By matching; By matching; By matching; By MS/MS; By MS/MS; By MS/MS; By MS/MS; By matching; By MS/MS	9.7; 4.6; 2; 11; 10.7; 8.6; 2.6; 4.6; 5.4	13962; 22613; 9481.4; 49343; 55682; 14326; 12680; 4202.2; 14324	6352.6; 24965; 0; 13318; 30844; 21089; 11383; 8233.1; 8602.9	0; 0; 0; 5; 2; 3; 3; 0; 1
alr1594	0.314654	1	false	truth	0.882875	0.309598	0.180174	0.0269093	0.723017	1.09156	18; 16; 15; 15; 17; 11; 17; 17; 17	18; 16; 15; 15; 17; 11; 17; 17; 17	18; 16; 15; 15; 17; 11; 17; 17; 17	17	By MS/MS; By MS/MS; By MS/MS; By MS/MS; By MS/MS; By MS/MS; By MS/MS; By MS/MS; By MS/MS	22.8; 23.5; 20.9; 21.7; 24.6; 17.8; 26.4; 22.6; 25.1	144440; 221720; 87166; 177070; 201530; 48855; 121110; 76699; 120330	75450; 95926; 63689; 94909; 83602; 39909; 95325; 63030; 72734	7; 8; 8; 10; 8; 5; 12; 10; 15	13; 16; 16; 18; 17; 16; 18; 19; 20	13; 16; 16; 18; 17; 16; 18; 19; 20	13; 16; 16; 18; 17; 16; 18; 19; 20	17	By MS/MS; By MS/MS; By MS/MS; By MS/MS; By MS/MS; By MS/MS; By MS/MS; By MS/MS; By MS/MS	18.8; 24.5; 22.5; 24.8; 23.5; 24.8; 25.3; 25.7; 29	12847; 111610; 153790; 226790; 173280; 213020; 107070; 331800; 166880	41110; 52785; 98040; 166860; 70294; 101140; 119120; 77284; 102480	9; 7; 11; 14; 5; 10; 15; 6; 17
alr1595	0.275668	1	false	truth	0.793043	0.479159	0.278852	0.0651148	0.554637	1.14192	9; 10; 8; 11; 10; 8; 8; 7; 9	9; 10; 8; 11; 10; 8; 8; 7; 9	9; 10; 8; 11; 10; 8; 8; 7; 9	9	By MS/MS; By MS/MS; By MS/MS; By MS/MS; By MS/MS; By MS/MS; By MS/MS; By MS/MS; By MS/MS	22.7; 24.5; 18.9; 26.4; 23.8; 18.7; 21.3; 18.7; 24.3	34730; 54752; 62709; 153360; 139790; 72933; 44829; 19170; 31600	99477; 26017; 74175; 71271; 73887; 59934; 47080; 49104; 32349	9; 7; 10; 9; 8; 4; 7; 5; 6	3; 9; 8; 11; 10; 9; 8; 8; 13	3; 9; 8; 11; 10; 9; 8; 8; 13	3; 9; 8; 11; 10; 9; 8; 8; 13	9	By MS/MS; By MS/MS; By MS/MS; By MS/MS; By MS/MS; By MS/MS; By MS/MS; By MS/MS; By MS/MS	7.4; 19.5; 20.2; 30.6; 26.2; 27.5; 18.7; 20.2; 35.8	40552; 64863; 38331; 176300; 243600; 194280; 126070; 125820; 128200	80221; 32060; 27489; 71367; 124530; 93939; 95597; 99305; 83204	3; 7; 6; 10; 8; 8; 10; 4; 8
alr1596	0.999468	1	false	truth	0.999933	0.29744	0.173099	0.0116725	0.837225	1.18626	25; 20; 19; 23; 16; 14; 18; 20; 19	25; 20; 19; 23; 16; 14; 18; 20; 19	25; 20; 19; 23; 16; 14; 18; 20; 19	19	By MS/MS; By MS/MS; By MS/MS; By MS/MS; By MS/MS; By MS/MS; By MS/MS; By MS/MS; By MS/MS	27.9; 21.2; 20.5; 26.7; 19; 15.8; 20.7; 23.6; 21.9	182250; 207540; 166590; 276450; 219280; 210350; 426170; 360050; 309530	123160; 146640; 169240; 201400; 137640; 113230; 159640; 90939; 146260	12; 16; 14; 19; 8; 3; 25; 14; 21	19; 15; 20; 26; 24; 30; 26; 21; 20	19; 15; 20; 26; 24; 30; 26; 21; 20	19; 15; 20; 26; 24; 30; 26; 21; 20	21	By MS/MS; By MS/MS; By MS/MS; By MS/MS; By MS/MS; By MS/MS; By MS/MS; By MS/MS; By MS/MS	21.3; 15.6; 22.4; 31; 28.6; 32.7; 28.6; 20.7; 21.4	119410; 163930; 142670; 375530; 413300; 258450; 324600; 347240; 244890	100050; 132110; 110320; 184970; 183120; 154370; 161920; 170360; 149910	5; 11; 11; 21; 13; 22; 23; 6; 18
alr1602	0.819246	1	false	truth	1.10855	0.889858	0.954026	0.394454	0.407819	3.25352	1; 1; 0; 3; 1; 0; 3; 4; 3	1; 1; 0; 3; 1; 0; 3; 4; 3	1; 1; 0; 3; 1; 0; 3; 4; 3	1	By MS/MS; By matching; By matching; By MS/MS; By MS/MS; By matching; By MS/MS; By MS/MS; By MS/MS	5; 5.8; 0; 19.2; 8.3; 0; 19.2; 27.5; 19.2	3126.3; 15737; 0; 29754; 11884; 0; 31748; 51580; 17077	0; 0; 0; 15001; 0; 0; 10788; 25228; 0	1; 0; 0; 1; 1; 0; 1; 3; 3	2; 1; 1; 2; 3; 2; 1; 2; 1	2; 1; 1; 2; 3; 2; 1; 2; 1	2; 1; 1; 2; 3; 2; 1; 2; 1	2	By matching; By MS/MS; By MS/MS; By MS/MS; By MS/MS; By MS/MS; By MS/MS; By MS/MS; By MS/MS	13.3; 5.8; 5.8; 13.3; 17.5; 10.8; 10; 14.2; 5.8	5774.1; 9309.2; 11168; 16820; 17433; 32274; 8262; 29211; 13330	7454.2; 0; 0; 8313.1; 0; 26421; 0; 24467; 0	0; 1; 1; 1; 1; 1; 0; 2; 2
alr1603	0.468446	1	false	truth	0.825082	0.370643	0.399278	0.117349	0.495856	1.3737	1; 3; 2; 0; 1; 2; 2; 2; 1	1; 3; 2; 0; 1; 2; 2; 2; 1	1; 3; 2; 0; 1; 2; 2; 2; 1	2	By MS/MS; By MS/MS; By MS/MS; By matching; By matching; By matching; By MS/MS; By MS/MS; By matching	3.1; 18.7; 9.3; 0; 6.2; 9.3; 9.3; 9.3; 3.1	14595; 28352; 14669; 0; 2407.3; 27440; 35373; 23577; 4332.7	0; 12258; 16467; 0; 0; 0; 27150; 25339; 0	1; 1; 4; 0; 0; 0; 4; 1; 0	1; 1; 1; 3; 2; 3; 2; 4; 1	1; 1; 1; 3; 2; 3; 2; 4; 1	1; 1; 1; 3; 2; 3; 2; 4; 1	2	By matching; By matching; By matching; By MS/MS; By MS/MS; By MS/MS; By MS/MS; By MS/MS; By matching	3.1; 6.2; 3.1; 18.7; 9.3; 19.4; 16.3; 28.7; 3.1	7057; 3423.3; 700.46; 71452; 42027; 17950; 10936; 54725; 13208	0; 0; 0; 31134; 29756; 0; 0; 19581; 0	0; 0; 0; 7; 3; 2; 3; 0; 0
alr1607	0.273374	1	false	truth	0.771199	0.346107	0.306077	0.0928872	0.519242	1.18109	1; 2; 3; 2; 3; 2; 4; 2; 1	1; 2; 3; 2; 3; 2; 4; 2; 1	1; 2; 3; 2; 3; 2; 4; 2; 1	2	By MS/MS; By MS/MS; By MS/MS; By MS/MS; By MS/MS; By MS/MS; By MS/MS; By MS/MS; By MS/MS	6.1; 14.6; 14.6; 18.9; 27.4; 27.4; 27.4; 18.9; 6.1	0; 9617.4; 8479.4; 5831.2; 12364; 10881; 18588; 6459.6; 7390.2	0; 0; 7813.2; 0; 13537; 8619.3; 10233; 0; 0	1; 1; 3; 1; 3; 2; 5; 2; 1	2; 2; 2; 3; 2; 3; 2; 2; 1	2; 2; 2; 3; 2; 3; 2; 2; 1	2; 2; 2; 3; 2; 3; 2; 2; 1	2	By MS/MS; By MS/MS; By MS/MS; By MS/MS; By MS/MS; By MS/MS; By MS/MS; By matching; By MS/MS	14.6; 18.9; 14.6; 14.6; 14.6; 14.6; 27.4; 14.6; 14.6	11040; 0; 6756.2; 22590; 20670; 19050; 7014.4; 13305; 3792.8	10769; 0; 0; 18417; 20152; 12627; 0; 9682.4; 0	1; 2; 1; 3; 1; 2; 3; 0; 2
alr1613	0.324207	1	false	truth	0.848689	0.207517	0.285548	0.00848994	0.569096	1.14282	2; 2; 1; 0; 2; 4; 2; 1; 3	2; 2; 1; 0; 2; 4; 2; 1; 3	2; 2; 1; 0; 2; 4; 2; 1; 3	2	By matching; By MS/MS; By MS/MS; By matching; By matching; By matching; By MS/MS; By MS/MS; By matching	7.5; 12.3; 4; 0; 7.5; 17.5; 9.9; 4; 19.8	6652.8; 6280.7; 7351.9; 0; 4226.9; 12209; 3341.7; 5417.2; 10586	7207.3; 0; 0; 0; 5395.7; 8560.7; 0; 0; 0	0; 1; 1; 0; 0; 0; 1; 1; 0	0; 2; 1; 4; 1; 2; 4; 2; 4	0; 2; 1; 4; 1; 2; 4; 2; 4	0; 2; 1; 4; 1; 2; 4; 2; 4	2	By matching; By matching; By matching; By MS/MS; By matching; By MS/MS; By MS/MS; By matching; By MS/MS	0; 13.9; 8.3; 27; 4; 11.9; 25.8; 12.3; 23.8	0; 5641.6; 2758.5; 44484; 15824; 12925; 15459; 14376; 19442	0; 0; 0; 13056; 0; 0; 0; 0; 7744.4	0; 0; 0; 3; 0; 1; 2; 0; 1
alr1690	0.00973269	1	false	false	Infinity	#N/A	#N/A	#N/A	#N/A	#N/A	1; 1; 3; 2; 0; 1; 2; 3; 1	1; 1; 3; 2; 0; 1; 2; 3; 1	1; 1; 3; 2; 0; 1; 2; 3; 1	1	By MS/MS; By matching; By MS/MS; By MS/MS; By matching; By matching; By MS/MS; By MS/MS; By MS/MS	3.1; 5.2; 15.8; 9.9; 0; 7.1; 7.8; 13; 3.1	7143.1; 9863.4; 19004; 10963; 0; 7386.6; 8563.4; 20845; 9805.8	0; 0; 8224.3; 9084.4; 0; 0; 0; 11670; 0	1; 0; 1; 1; 0; 0; 2; 2; 2	0; 0; 1; 2; 1; 1; 2; 1; 1	0; 0; 1; 2; 1; 1; 2; 1; 1	0; 0; 1; 2; 1; 1; 2; 1; 1	1	By matching; By matching; By matching; By matching; By matching; By matching; By MS/MS; By matching; By MS/MS	0; 0; 5.2; 12.3; 7.1; 5.2; 10.6; 5.2; 7.1	0; 0; 6354.3; 32783; 144430; 5941.9; 19580; 4052.8; 13486	0; 0; 0; 0; 0; 0; 0; 0; 0	0; 0; 0; 0; 0; 0; 1; 0; 1
alr1709	0.160197	1	false	truth	0.682163	0.321662	0.312524	0.0906962	0.415476	1.08493	3; 3; 2; 2; 1; 2; 2; 0; 2	3; 3; 2; 2; 1; 2; 2; 0; 2	3; 3; 2; 2; 1; 2; 2; 0; 2	2	By MS/MS; By MS/MS; By MS/MS; By MS/MS; By matching; By matching; By MS/MS; By matching; By MS/MS	15.1; 15.1; 15.1; 9.4; 4.7; 10; 8.7; 0; 11	40958; 15587; 7586.6; 8177.3; 5598.7; 7322.1; 5761.8; 0; 2504.1	3605.3; 0; 0; 9061.8; 0; 8381.5; 9716; 0; 0	1; 2; 1; 1; 0; 0; 2; 0; 2	0; 3; 1; 3; 1; 3; 2; 2; 3	0; 3; 1; 3; 1; 3; 2; 2; 3	0; 3; 1; 3; 1; 3; 2; 2; 3	2	By matching; By MS/MS; By matching; By MS/MS; By MS/MS; By MS/MS; By MS/MS; By matching; By MS/MS	0; 16.4; 6.4; 15.1; 4.7; 19.7; 11; 9.4; 15.7	0; 9730.7; 6269.1; 10805; 5975.1; 8163.1; 9790.8; 15562; 34617	0; 7232.5; 0; 13431; 0; 0; 0; 12339; 14457	0; 1; 0; 3; 1; 4; 2; 0; 5
alr1742	0.0176445	1	false	truth	0.676182	0.253523	0.147541	0.034747	0.548391	0.852656	14; 11; 13; 14; 12; 14; 15; 11; 14	14; 11; 13; 14; 12; 14; 15; 11; 14	14; 11; 13; 14; 12; 14; 15; 11; 14	14	By MS/MS; By MS/MS; By MS/MS; By MS/MS; By MS/MS; By MS/MS; By MS/MS; By MS/MS; By MS/MS	28; 20.9; 25.1; 27.2; 21.5; 28.9; 27.2; 23.4; 28.4	208350; 218780; 205870; 278070; 249570; 212320; 267040; 344950; 291310	162200; 172910; 143020; 132340; 144970; 87513; 135950; 187350; 165500	21; 10; 21; 25; 14; 6; 35; 36; 34	13; 13; 13; 12; 16; 15; 14; 11; 13	13; 13; 13; 12; 16; 15; 14; 11; 13	13; 13; 13; 12; 16; 15; 14; 11; 13	13	By MS/MS; By MS/MS; By MS/MS; By MS/MS; By MS/MS; By MS/MS; By MS/MS; By MS/MS; By MS/MS	27.3; 22.9; 25.4; 30.3; 28.9; 28.8; 25; 20.7; 28.3	249570; 188640; 160790; 526630; 818380; 787470; 483200; 324280; 226740	156730; 222080; 81924; 276140; 310500; 286770; 226840; 286630; 211530	15; 18; 12; 21; 12; 23; 27; 11; 23
alr1744	0.155156	1	false	truth	1.48605	1.10871	0.667003	0.102515	0.931556	2.38004	4; 6; 4; 8; 8; 3; 7; 6; 6	4; 6; 4; 8; 8; 3; 7; 6; 6	4; 6; 4; 8; 8; 3; 7; 6; 6	6	By MS/MS; By MS/MS; By MS/MS; By MS/MS; By MS/MS; By MS/MS; By MS/MS; By MS/MS; By MS/MS	17.2; 25.8; 18.5; 36.7; 38.3; 13; 32.8; 29.4; 28.9	49044; 76638; 45664; 85046; 100720; 36038; 22897; 52954; 64306	20290; 41342; 25623; 31769; 63599; 32728; 9437.3; 67948; 41976	1; 3; 3; 5; 5; 2; 6; 5; 4	3; 5; 3; 4; 4; 5; 5; 6; 6	3; 5; 3; 4; 4; 5; 5; 6; 6	3; 5; 3; 4; 4; 5; 5; 6; 6	5	By MS/MS; By MS/MS; By MS/MS; By MS/MS; By MS/MS; By MS/MS; By MS/MS; By MS/MS; By MS/MS	15.1; 20.8; 12.2; 15.1; 15.1; 21.9; 21.9; 27.1; 27.1	28660; 58608; 3486.1; 59308; 49902; 48174; 56373; 51000; 46394	33483; 48726; 0; 20544; 18692; 13386; 26026; 23085; 22596	1; 3; 2; 3; 1; 3; 3; 1; 3
alr1819	0.364632	1	false	truth	0.621571	0.753661	0.626756	0.231543	0.069763	1.54795	4; 3; 6; 4; 3; 2; 1; 1; 0	4; 3; 6; 4; 3; 2; 1; 1; 0	4; 3; 6; 4; 3; 2; 1; 1; 0	3	By MS/MS; By MS/MS; By MS/MS; By MS/MS; By MS/MS; By matching; By MS/MS; By MS/MS; By matching	11.8; 10; 20.6; 10.2; 13.3; 7.7; 3.4; 3.4; 0	43467; 30511; 35994; 799750; 11157; 18748; 0; 0; 0	126590; 31933; 31156; 0; 8397.4; 18956; 0; 0; 0	6; 5; 6; 2; 1; 0; 1; 1; 0	4; 4; 4; 2; 2; 2; 1; 1; 0	4; 4; 4; 2; 2; 2; 1; 1; 0	4; 4; 4; 2; 2; 2; 1; 1; 0	2	By MS/MS; By MS/MS; By MS/MS; By MS/MS; By MS/MS; By MS/MS; By MS/MS; By matching; By matching	12.5; 12; 11.6; 6.6; 4.8; 5.7; 3.4; 3.8; 0	92788; 56858; 113850; 34887; 2224.3; 53805; 10135; 3062.3; 0	88306; 49853; 113360; 20978; 0; 72466; 0; 0; 0	3; 3; 7; 2; 1; 3; 1; 0; 0
alr1827	0.638529	1	false	truth	1.18347	0.710161	0.758049	0.389729	0.709292	3.16923	3; 4; 3; 1; 4; 2; 3; 3; 2	3; 4; 3; 1; 4; 2; 3; 3; 2	3; 4; 3; 1; 4; 2; 3; 3; 2	3	By MS/MS; By MS/MS; By MS/MS; By MS/MS; By MS/MS; By MS/MS; By MS/MS; By MS/MS; By MS/MS	8.5; 11; 8.5; 1.5; 11.2; 5.1; 9.5; 9.5; 5.1	14986; 26605; 20670; 6761.4; 24217; 8076.6; 989.07; 17663; 15028	13049; 16484; 12581; 0; 10013; 0; 0; 17324; 12425	3; 2; 2; 1; 2; 1; 2; 2; 2	2; 1; 0; 2; 1; 3; 2; 1; 7	2; 1; 0; 2; 1; 3; 2; 1; 7	2; 1; 0; 2; 1; 3; 2; 1; 7	2	By MS/MS; By MS/MS; By matching; By MS/MS; By matching; By MS/MS; By MS/MS; By MS/MS; By MS/MS	6.1; 3.6; 0; 4.9; 1.5; 8.5; 5.9; 3.6; 20.5	1770.3; 0; 0; 4282.1; 4057.3; 34093; 8115.2; 13855; 48751	0; 0; 0; 0; 0; 13375; 5777.9; 0; 16753	1; 1; 0; 1; 0; 1; 1; 1; 3
alr1832	0.0102125	1	false	truth	1.31789	0.245532	0.33654	0.0136652	0.996792	1.6755	1; 1; 0; 2; 0; 2; 1; 1; 1	1; 1; 0; 2; 0; 2; 1; 1; 1	1; 1; 0; 2; 0; 2; 1; 1; 1	1	By matching; By matching; By matching; By MS/MS; By matching; By matching; By MS/MS; By MS/MS; By MS/MS	2.3; 2.3; 0; 4.6; 0; 6.7; 4.4; 4.4; 4.4	4499.8; 3999; 0; 12640; 0; 10432; 2087.2; 3106; 2825	0; 0; 0; 8946.7; 0; 6721.4; 0; 0; 0	0; 0; 0; 1; 0; 0; 0; 2; 4	0; 1; 1; 3; 3; 3; 1; 2; 4	0; 1; 1; 3; 3; 3; 1; 2; 4	0; 1; 1; 3; 3; 3; 1; 2; 4	2	By matching; By MS/MS; By matching; By MS/MS; By MS/MS; By MS/MS; By MS/MS; By MS/MS; By MS/MS	0; 2.3; 2.3; 9; 13.4; 11.9; 4.4; 6.7; 14.4	0; 3450.8; 3513.2; 21701; 9450.9; 8873; 3003.6; 8606.7; 7814.9	0; 0; 0; 9112.4; 0; 6167.8; 0; 7447.1; 5372	0; 0; 0; 3; 2; 4; 2; 0; 3
alr1834	0.215564	1	false	truth	0.785532	0.405477	0.235972	0.0671768	0.591317	1.09289	5; 4; 6; 7; 4; 6; 4; 5; 5	5; 4; 6; 7; 4; 6; 4; 5; 5	5; 4; 6; 7; 4; 6; 4; 5; 5	5	By MS/MS; By MS/MS; By MS/MS; By MS/MS; By MS/MS; By MS/MS; By MS/MS; By MS/MS; By MS/MS	20.6; 16.8; 27.7; 27.7; 17; 24.3; 18.6; 23.1; 22.9	76220; 107160; 86933; 74234; 34138; 125900; 96609; 84836; 121030	45217; 54550; 66503; 50435; 33581; 63705; 80265; 69255; 84778	8; 4; 10; 10; 3; 6; 6; 10; 14	6; 8; 5; 5; 6; 7; 7; 7; 5	6; 8; 5; 5; 6; 7; 7; 7; 5	6; 8; 5; 5; 6; 7; 7; 7; 5	6	By MS/MS; By MS/MS; By MS/MS; By MS/MS; By MS/MS; By MS/MS; By MS/MS; By MS/MS; By MS/MS	21.5; 31.5; 20.6; 22; 23.8; 24.7; 29.3; 24.3; 19.3	75414; 87099; 41481; 135550; 132420; 162570; 90476; 196900; 218120	50988; 90583; 71467; 80484; 56830; 78354; 38750; 103020; 140650	5; 7; 8; 8; 5; 10; 15; 5; 7
alr1850	0.0280146	1	false	truth	1.55313	0.77509	0.465815	0.0441901	1.14309	2.10678	6; 6; 6; 8; 5; 2; 4; 9; 8	6; 6; 6; 8; 5; 2; 4; 9; 8	6; 6; 6; 8; 5; 2; 4; 9; 8	6	By MS/MS; By MS/MS; By MS/MS; By MS/MS; By MS/MS; By MS/MS; By MS/MS; By MS/MS; By MS/MS	16.6; 18; 16.4; 23.2; 11.9; 5.7; 9.9; 26.1; 24.4	31622; 89290; 53840; 161040; 56299; 28154; 24774; 183670; 133030	53155; 45055; 28907; 84252; 71352; 58237; 58065; 86630; 36759	7; 9; 8; 18; 6; 3; 3; 9; 5	3; 0; 6; 5; 4; 4; 7; 3; 6	3; 0; 6; 5; 4; 4; 7; 3; 6	3; 0; 6; 5; 4; 4; 7; 3; 6	4	By MS/MS; By matching; By MS/MS; By MS/MS; By MS/MS; By MS/MS; By MS/MS; By matching; By MS/MS	10.9; 0; 17.4; 14.7; 11.3; 8.8; 18.3; 6.6; 16.1	67318; 0; 50529; 137280; 134740; 20865; 179780; 16305; 124800	31279; 0; 29399; 57747; 55024; 30838; 57607; 19055; 39075	6; 0; 3; 2; 3; 5; 7; 0; 6
alr1878	0.0089186	1	false	truth	2.14972	1.30324	0.780995	0.0584176	1.46726	3.09892	7; 5; 6; 8; 5; 8; 7; 2; 5	7; 5; 6; 8; 5; 8; 7; 2; 5	7; 5; 6; 8; 5; 8; 7; 2; 5	6	By MS/MS; By MS/MS; By MS/MS; By MS/MS; By MS/MS; By MS/MS; By MS/MS; By MS/MS; By MS/MS	33; 22.9; 25.6; 35.4; 21.4; 36.3; 33.9; 10.4; 25	44663; 74273; 58282; 60805; 101080; 60380; 26028; 4262.7; 37711	43214; 51393; 53617; 56695; 51881; 37906; 26453; 9064.8; 18687	7; 5; 8; 7; 5; 1; 5; 1; 4	3; 7; 7; 5; 6; 3; 7; 6; 3	3; 7; 7; 5; 6; 3; 7; 6; 3	3; 7; 7; 5; 6; 3; 7; 6; 3	6	By MS/MS; By MS/MS; By MS/MS; By MS/MS; By MS/MS; By MS/MS; By MS/MS; By matching; By MS/MS	16.1; 35.4; 32.1; 21.7; 29.5; 13.1; 29.8; 28.3; 15.8	27701; 31887; 46797; 53367; 47573; 14563; 22634; 32794; 21397	28514; 17985; 18631; 24898; 16651; 0; 13852; 8319.4; 19072	3; 3; 1; 8; 3; 4; 3; 0; 1
alr1879	0.171099	1	false	truth	0.837968	0.323702	0.188382	0.00653385	0.654398	1.03256	7; 5; 8; 6; 5; 5; 2; 5; 6	7; 5; 8; 6; 5; 5; 2; 5; 6	7; 5; 8; 6; 5; 5; 2; 5; 6	5	By MS/MS; By MS/MS; By MS/MS; By MS/MS; By MS/MS; By MS/MS; By MS/MS; By MS/MS; By MS/MS	21.4; 12.9; 23.9; 17.4; 13.1; 13.3; 5.3; 12.5; 15.3	42492; 16715; 54329; 65218; 73528; 66666; 42940; 39320; 31067	27763; 17957; 32533; 52952; 52524; 42510; 49096; 24523; 32162	7; 4; 9; 8; 4; 2; 3; 4; 6	7; 5; 10; 6; 7; 9; 6; 6; 7	7; 5; 10; 6; 7; 9; 6; 6; 7	7; 5; 10; 6; 7; 9; 6; 6; 7	7	By MS/MS; By MS/MS; By MS/MS; By MS/MS; By MS/MS; By MS/MS; By MS/MS; By MS/MS; By MS/MS	19.3; 14; 27.5; 17.2; 22.7; 27.3; 17.2; 17.2; 18.4	84558; 74195; 118690; 93116; 37863; 133490; 90886; 72352; 63235	40211; 47282; 40045; 75611; 30122; 48576; 46324; 50487; 43841	2; 3; 7; 3; 2; 8; 8; 3; 6
alr1890	0.479395	1	false	truth	1.08175	0.353872	0.20594	0.0210329	0.895562	1.31443	10; 4; 10; 12; 11; 13; 11; 11; 9	10; 4; 10; 12; 11; 13; 11; 11; 9	10; 4; 10; 12; 11; 13; 11; 11; 9	11	By MS/MS; By MS/MS; By MS/MS; By MS/MS; By MS/MS; By MS/MS; By MS/MS; By MS/MS; By MS/MS	27.8; 11.6; 28.1; 35.2; 37.5; 42.6; 37.3; 39.2; 32.1	95360; 71750; 120640; 152180; 116300; 191900; 125010; 111510; 116900	107810; 105130; 107990; 73044; 73373; 56645; 107180; 70301; 81720	9; 1; 11; 12; 4; 6; 14; 11; 14	8; 7; 8; 9; 10; 10; 12; 9; 8	8; 7; 8; 9; 10; 10; 12; 9; 8	8; 7; 8; 9; 10; 10; 12; 9; 8	9	By MS/MS; By MS/MS; By MS/MS; By MS/MS; By MS/MS; By MS/MS; By MS/MS; By MS/MS; By MS/MS	23.4; 19.4; 24.3; 31.6; 31; 30.2; 36.9; 31.7; 27.6	96123; 68776; 91871; 160200; 158150; 194510; 138070; 134550; 87339	86858; 80406; 82572; 114110; 103810; 84513; 79811; 83026; 37221	3; 4; 5; 6; 9; 9; 10; 3; 8
alr1894	0.42483	1	false	truth	1.42514	1.77583	1.10584	0.38161	0.645995	3.96321	4; 3; 5; 4; 2; 2; 2; 2; 2	4; 3; 5; 4; 2; 2; 2; 2; 2	4; 3; 5; 4; 2; 2; 2; 2; 2	2	By MS/MS; By MS/MS; By MS/MS; By MS/MS; By MS/MS; By MS/MS; By MS/MS; By MS/MS; By MS/MS	21.9; 13.9; 27.9; 21.5; 12.4; 13.9; 12.4; 12.4; 12.4	26860; 23425; 44995; 37516; 28501; 34428; 17425; 10264; 0	93864; 11360; 60379; 54881; 28873; 19873; 24107; 13155; 0	4; 1; 3; 5; 2; 1; 2; 1; 2	3; 4; 2; 3; 4; 4; 1; 3; 4	3; 4; 2; 3; 4; 4; 1; 3; 4	3; 4; 2; 3; 4; 4; 1; 3; 4	3	By MS/MS; By MS/MS; By MS/MS; By MS/MS; By MS/MS; By MS/MS; By MS/MS; By MS/MS; By matching	13.9; 21.9; 9.6; 17.1; 21.9; 21.5; 4.8; 21.5; 24.7	22619; 33590; 20507; 34687; 39606; 10074; 16651; 30147; 19176	4206.4; 68635; 63972; 20462; 22976; 4244.5; 0; 19281; 12439	2; 2; 2; 3; 1; 1; 1; 0; 0
alr1896	0.0401909	1	false	truth	1.26069	0.392587	0.22847	0.0182516	1.05235	1.5159	17; 17; 16; 21; 15; 15; 14; 15; 16	16; 16; 14; 20; 15; 15; 13; 14; 15	16; 16; 14; 20; 15; 15; 13; 14; 15	15	By MS/MS; By MS/MS; By MS/MS; By MS/MS; By MS/MS; By MS/MS; By MS/MS; By MS/MS; By MS/MS	40.5; 43.4; 37; 48.4; 38.2; 34.5; 35.5; 37.7; 36.6	118450; 178130; 141530; 214330; 176650; 324210; 82965; 182810; 182210	153200; 151620; 171780; 145300; 116020; 135020; 106800; 102410; 127700	22; 21; 20; 42; 15; 8; 21; 26; 32	12; 16; 14; 17; 14; 17; 16; 16; 15	11; 15; 14; 15; 14; 16; 15; 14; 14	11; 15; 14; 15; 14; 16; 15; 14; 14	14	By MS/MS; By MS/MS; By MS/MS; By MS/MS; By MS/MS; By MS/MS; By MS/MS; By MS/MS; By MS/MS	34.3; 38.2; 30.4; 38; 30.9; 40; 42; 33.9; 41.1	60698; 150830; 158490; 225100; 143490; 211990; 237770; 119060; 329390	89735; 129560; 112020; 112980; 89795; 147250; 94587; 90121; 129600	7; 12; 12; 16; 9; 22; 16; 4; 11
alr1924	0.671343	1	false	truth	0.913308	0.349905	0.347174	0.0311215	0.588721	1.29657	2; 2; 4; 2; 1; 3; 2; 3; 5	2; 2; 4; 2; 1; 3; 2; 3; 5	2; 2; 4; 2; 1; 3; 2; 3; 5	2	By MS/MS; By matching; By MS/MS; By MS/MS; By matching; By matching; By MS/MS; By MS/MS; By MS/MS	10.5; 8.5; 16.8; 11.8; 6.1; 17.6; 11.3; 14; 17.6	1045.3; 3427.3; 7099.9; 3142.2; 3446.5; 9186.3; 0; 9203; 7936.5	0; 0; 0; 0; 0; 8576.8; 0; 7753.8; 5007.4	3; 0; 1; 2; 0; 0; 2; 5; 3	0; 1; 1; 5; 3; 3; 3; 3; 4	0; 1; 1; 5; 3; 3; 3; 3; 4	0; 1; 1; 5; 3; 3; 3; 3; 4	3	By matching; By MS/MS; By matching; By MS/MS; By MS/MS; By MS/MS; By MS/MS; By matching; By MS/MS	0; 5; 5.5; 23.1; 14; 14.9; 17.6; 14.9; 16.8	0; 0; 3030.8; 29772; 17019; 10945; 10681; 10448; 13188	0; 0; 0; 9921; 10713; 8592.4; 7481.5; 8781.8; 7372.6	0; 1; 0; 3; 1; 5; 1; 0; 3
alr1952	0.000843653	1	false	truth	Infinity	#N/A	#N/A	#N/A	#N/A	#N/A	3; 2; 3; 2; 3; 1; 4; 2; 3	3; 2; 3; 2; 3; 1; 4; 2; 3	3; 2; 3; 2; 3; 1; 4; 2; 3	3	By MS/MS; By MS/MS; By MS/MS; By MS/MS; By matching; By matching; By MS/MS; By MS/MS; By MS/MS	9.4; 4.5; 7.1; 7.6; 9.4; 2.7; 11.8; 6.3; 6.7	5970.2; 10284; 5239.9; 3484.8; 18420; 1533.9; 21737; 10172; 5737.9	0; 9967.7; 0; 0; 11874; 0; 11861; 9754; 0	2; 1; 3; 3; 0; 0; 3; 1; 3	0; 1; 2; 2; 2; 1; 1; 1; 1	0; 1; 2; 2; 2; 1; 1; 1; 1	0; 1; 2; 2; 2; 1; 1; 1; 1	1	By matching; By matching; By matching; By MS/MS; By MS/MS; By MS/MS; By matching; By matching; By matching	0; 4.1; 6.7; 5.9; 7.6; 2.7; 2.4; 2.7; 5.1	0; 2366.2; 5105.6; 6761.7; 12436; 7535.7; 3469.4; 5004; 3737.8	0; 0; 0; 0; 0; 0; 0; 0; 0	0; 0; 0; 1; 1; 1; 0; 0; 0
alr1960	0.667423	1	false	truth	0.917489	0.348949	0.339035	0.00384372	0.581323	1.26074	1; 2; 1; 2; 3; 1; 1; 1; 2	1; 2; 1; 2; 3; 1; 1; 1; 2	1; 2; 1; 2; 3; 1; 1; 1; 2	1	By matching; By matching; By matching; By matching; By matching; By matching; By matching; By matching; By matching	14.5; 23.3; 14.5; 23.3; 32.1; 8.8; 14.5; 8.8; 23.3	1148.8; 4179.9; 733.95; 11380; 16000; 5376.3; 1226.8; 12179; 8660.7	0; 5907.3; 0; 4859.5; 3688.6; 0; 0; 0; 9161.4	0; 0; 0; 0; 0; 0; 0; 0; 0	3; 1; 1; 1; 2; 2; 1; 3; 2	3; 1; 1; 1; 2; 2; 1; 3; 2	3; 1; 1; 1; 2; 2; 1; 3; 2	2	By matching; By matching; By matching; By matching; By matching; By MS/MS; By matching; By matching; By matching	32.1; 8.8; 8.8; 8.8; 23.3; 17.6; 8.8; 32.1; 23.3	14136; 2012.1; 5141.3; 15611; 16485; 8777.3; 7733; 17231; 7249.5	5364.6; 0; 0; 0; 5795.9; 0; 0; 6333.2; 6375.7	0; 0; 0; 0; 0; 1; 0; 0; 0
alr2001	0.116582	1	false	truth	1.41466	0.693672	0.467286	0.0373889	0.990171	1.94904	2; 3; 1; 6; 4; 4; 4; 4; 2	2; 3; 1; 6; 4; 4; 4; 4; 2	2; 3; 1; 6; 4; 4; 4; 4; 2	4	By MS/MS; By MS/MS; By matching; By MS/MS; By MS/MS; By MS/MS; By MS/MS; By MS/MS; By MS/MS	12.2; 17; 6.3; 39.1; 25.1; 25.8; 25.1; 25.1; 10.7	7268.4; 15439; 2670.2; 14837; 27406; 39531; 14525; 14207; 11176	0; 12745; 0; 5234.3; 19518; 9671.6; 19420; 13408; 10546	3; 2; 0; 6; 2; 0; 6; 6; 2	1; 5; 3; 3; 4; 5; 3; 3; 2	1; 5; 3; 3; 4; 5; 3; 3; 2	1; 5; 3; 3; 4; 5; 3; 3; 2	3	By matching; By MS/MS; By MS/MS; By MS/MS; By MS/MS; By MS/MS; By matching; By matching; By MS/MS	6.3; 30.3; 15.1; 17.7; 26.9; 30.3; 17; 18.8; 12.5	4421.9; 16236; 8420.4; 22016; 8914.2; 28283; 20842; 15131; 1703.4	0; 9832; 3918.4; 17173; 9401.7; 9695.3; 9007.5; 10955; 0	0; 2; 2; 3; 3; 3; 0; 0; 1
alr2055	0.0888672	1	false	truth	0.65197	0.295006	0.300807	0.0201543	0.3612	0.969561	5; 2; 1; 3; 4; 2; 1; 2; 2	5; 2; 1; 3; 4; 2; 1; 2; 2	5; 2; 1; 3; 4; 2; 1; 2; 2	2	By MS/MS; By MS/MS; By MS/MS; By MS/MS; By matching; By MS/MS; By MS/MS; By MS/MS; By MS/MS	31.6; 11.8; 4.6; 20.3; 25.3; 11.8; 4.6; 12.2; 10.1	15827; 26438; 10789; 22894; 24093; 11196; 14321; 0; 24763	0; 22773; 0; 0; 10533; 6317.5; 0; 0; 16455	4; 2; 2; 2; 0; 1; 1; 2; 2	2; 2; 3; 1; 1; 1; 4; 1; 2	2; 2; 3; 1; 1; 1; 4; 1; 2	2; 2; 3; 1; 1; 1; 4; 1; 2	2	By MS/MS; By MS/MS; By MS/MS; By MS/MS; By matching; By MS/MS; By MS/MS; By matching; By MS/MS	11.8; 11.8; 18.1; 7.2; 4.6; 7.2; 24.5; 7.2; 11	23150; 18535; 5606.4; 13495; 4499; 14422; 30417; 9098.8; 10742	20593; 17079; 0; 0; 0; 0; 25897; 0; 0	2; 3; 1; 1; 0; 1; 3; 0; 1
alr2073	0.867704	1	false	truth	1.04082	0.440215	0.477648	0.116054	0.651374	1.70356	3; 3; 4; 2; 3; 4; 3; 2; 2	3; 3; 4; 2; 3; 4; 3; 2; 2	3; 3; 4; 2; 3; 4; 3; 2; 2	3	By MS/MS; By matching; By MS/MS; By matching; By matching; By MS/MS; By MS/MS; By MS/MS; By MS/MS	10.9; 10.9; 10.9; 8.2; 11.6; 14.8; 14.8; 11.1; 8.2	30629; 35283; 42780; 23598; 37806; 61702; 23700; 9587.8; 2879.4	0; 19053; 13693; 0; 0; 19661; 11066; 0; 0	2; 0; 0; 0; 0; 0; 3; 2; 3	2; 1; 2; 3; 2; 4; 2; 1; 2	2; 1; 2; 3; 2; 4; 2; 1; 2	2; 1; 2; 3; 2; 4; 2; 1; 2	2	By matching; By matching; By matching; By MS/MS; By MS/MS; By MS/MS; By MS/MS; By MS/MS; By MS/MS	3.4; 2.7; 6.1; 10.9; 7.5; 10.9; 8.2; 4.8; 9.9	20348; 6913.3; 18352; 42760; 8161.8; 55731; 12241; 3961; 21645	0; 0; 0; 15706; 0; 0; 18016; 0; 18333	0; 0; 0; 3; 0; 5; 1; 0; 2
alr2268	0.958267	1	false	truth	0.988783	0.510493	0.370705	0.0594884	0.663993	1.43866	1; 1; 1; 1; 2; 1; 2; 2; 3	1; 1; 1; 1; 2; 1; 2; 2; 3	1; 1; 1; 1; 2; 1; 2; 2; 3	1	By MS/MS; By matching; By MS/MS; By MS/MS; By matching; By matching; By MS/MS; By MS/MS; By MS/MS	3.7; 3.7; 3.7; 3.7; 16.7; 3.7; 9.8; 9.8; 13.9	6859.9; 5564.7; 6865.9; 12634; 19049; 10707; 15805; 22325; 14561	0; 0; 0; 0; 18258; 0; 12040; 17363; 11329	1; 0; 1; 1; 0; 0; 2; 1; 2	2; 2; 2; 4; 3; 3; 2; 2; 2	2; 2; 2; 4; 3; 3; 2; 2; 2	2; 2; 2; 4; 3; 3; 2; 2; 2	2	By matching; By MS/MS; By MS/MS; By MS/MS; By MS/MS; By MS/MS; By MS/MS; By matching; By MS/MS	10.2; 9.8; 9.8; 23.7; 20.4; 14.3; 9.8; 10.2; 8.2	12334; 11708; 10622; 45537; 45883; 29065; 22368; 16323; 16096	15029; 12147; 11433; 18739; 27098; 12269; 14611; 9388.6; 17180	0; 1; 1; 1; 2; 1; 2; 0; 2
alr2269	0.222952	1	false	truth	0.831945	0.353626	0.205797	0.0349533	0.650432	1.07372	6; 6; 4; 7; 6; 7; 3; 6; 6	6; 6; 4; 7; 6; 7; 3; 6; 6	6; 6; 4; 7; 6; 7; 3; 6; 6	6	By MS/MS; By MS/MS; By MS/MS; By MS/MS; By MS/MS; By MS/MS; By MS/MS; By MS/MS; By MS/MS	11.4; 8.3; 5.9; 12.7; 9.7; 11; 3.6; 9; 9.2	19901; 23456; 20690; 51312; 35873; 81931; 21602; 41362; 27188	17112; 15618; 27118; 29071; 23246; 16477; 35692; 27896; 33536	4; 1; 3; 9; 2; 1; 8; 5; 5	5; 5; 5; 7; 8; 9; 7; 3; 7	5; 5; 5; 7; 8; 9; 7; 3; 7	5; 5; 5; 7; 8; 9; 7; 3; 7	7	By MS/MS; By MS/MS; By MS/MS; By MS/MS; By MS/MS; By MS/MS; By MS/MS; By matching; By MS/MS	8.5; 7.9; 7.6; 10.4; 12.2; 15.5; 11.2; 3.8; 10.9	26999; 37024; 31477; 73325; 92254; 87526; 55729; 24051; 40104	36423; 36402; 16492; 34984; 40016; 19239; 34139; 35217; 25890	3; 4; 2; 2; 2; 3; 7; 0; 3
alr2309	0.408171	1	false	truth	0.854773	0.336926	#N/A	0.105144	#N/A	#N/A	1; 2; 1; 2; 1; 2; 3; 2; 3	1; 2; 1; 2; 1; 2; 3; 2; 3	1; 2; 1; 2; 1; 2; 3; 2; 3	2	By matching; By matching; By matching; By MS/MS; By matching; By matching; By MS/MS; By MS/MS; By MS/MS	2.6; 6; 1.7; 3.8; 2.1; 3.5; 7.6; 4.1; 7.6	5067.7; 27192; 2831.6; 13057; 6661.2; 9619.9; 1973.3; 20970; 4896.9	0; 0; 0; 0; 0; 9321.8; 0; 0; 0	0; 0; 0; 1; 0; 0; 2; 1; 1	2; 3; 2; 4; 6; 8; 5; 1; 5	2; 3; 2; 4; 6; 8; 5; 1; 5	2; 3; 2; 4; 6; 8; 5; 1; 5	4	By matching; By matching; By matching; By MS/MS; By MS/MS; By MS/MS; By MS/MS; By matching; By MS/MS	5.5; 6.4; 3.8; 12.6; 16.6; 22.8; 12.6; 1.7; 11.7	4541.2; 28532; 6524.9; 35518; 38389; 36553; 29372; 9950; 16351	0; 15455; 0; 12390; 5792.1; 10069; 21416; 0; 11694	0; 0; 0; 3; 1; 2; 3; 0; 1
alr2322	0.894092	1	false	truth	0.960674	0.434437	#N/A	0.581221	#N/A	#N/A	2; 1; 2; 1; 3; 2; 2; 2; 1	2; 1; 2; 1; 3; 1; 2; 2; 1	2; 1; 2; 1; 3; 1; 2; 2; 1	2	By matching; By matching; By matching; By matching; By matching; By matching; By matching; By MS/MS; By MS/MS	3.3; 1.8; 3.5; 1.8; 5.8; 3.4; 3.3; 3.8; 1.5	4602.5; 6375.6; 7271.3; 3214.3; 26576; 2009.8; 5229.6; 3792.8; 0	0; 0; 0; 0; 0; 0; 0; 6087.8; 0	0; 0; 0; 0; 0; 0; 0; 2; 1	1; 3; 3; 4; 1; 2; 0; 2; 1	1; 2; 3; 4; 1; 2; 0; 2; 1	1; 2; 3; 4; 1; 2; 0; 2; 1	2	By matching; By matching; By matching; By MS/MS; By MS/MS; By MS/MS; By matching; By matching; By MS/MS	1.7; 4.9; 5.3; 7.4; 1.9; 3.8; 0; 3.6; 1.9	13291; 11927; 19381; 50941; 2476.5; 6042.2; 0; 3944.6; 1583.7	0; 0; 9221.2; 5256.5; 0; 7296.5; 0; 0; 0	0; 0; 0; 4; 0; 2; 0; 0; 2
alr2323	0.39496	1	false	truth	0.87713	0.383276	0.23139	0.0300526	0.667793	1.14082	6; 3; 5; 5; 2; 6; 3; 5; 3	6; 3; 5; 5; 2; 6; 3; 5; 3	6; 3; 5; 5; 2; 6; 3; 5; 3	5	By MS/MS; By MS/MS; By MS/MS; By MS/MS; By MS/MS; By MS/MS; By MS/MS; By MS/MS; By MS/MS	12.8; 6.1; 12.8; 12.9; 5.6; 14.1; 8.4; 14.7; 8.2	38779; 25357; 56149; 25972; 15592; 50113; 10743; 13941; 1443.1	28815; 21794; 23293; 20018; 25533; 18166; 9314.4; 15670; 0	4; 1; 6; 5; 1; 1; 4; 4; 3	3; 3; 5; 7; 6; 7; 6; 3; 6	3; 3; 5; 7; 6; 7; 6; 3; 6	3; 3; 5; 7; 6; 7; 6; 3; 6	6	By MS/MS; By MS/MS; By MS/MS; By MS/MS; By MS/MS; By MS/MS; By MS/MS; By matching; By MS/MS	6.2; 7.8; 11.1; 19.1; 16.1; 16.3; 16.4; 9.1; 15.2	22007; 18460; 34075; 68644; 36464; 99371; 42743; 13990; 32494	26468; 29994; 25708; 28742; 16482; 37477; 24423; 16171; 15547	2; 4; 2; 5; 5; 6; 4; 0; 7
alr2328	0.246351	1	false	truth	0.797899	0.421068	0.245045	0.065662	0.594336	1.11361	12; 11; 14; 9; 10; 12; 12; 13; 11	12; 11; 14; 9; 10; 12; 12; 13; 11	12; 11; 14; 9; 10; 12; 12; 13; 11	12	By MS/MS; By MS/MS; By MS/MS; By MS/MS; By MS/MS; By MS/MS; By MS/MS; By MS/MS; By MS/MS	33.8; 34.6; 40.1; 24.1; 28.5; 31.6; 35; 42.6; 38.2	223750; 315740; 334950; 269770; 223500; 541010; 213860; 264660; 214270	193610; 216970; 256010; 174250; 161110; 276080; 174730; 189060; 123900	14; 15; 26; 16; 8; 9; 10; 11; 15	9; 11; 11; 9; 11; 10; 12; 10; 11	9; 11; 11; 9; 11; 10; 12; 10; 11	9; 11; 11; 9; 11; 10; 12; 10; 11	11	By MS/MS; By MS/MS; By MS/MS; By MS/MS; By MS/MS; By MS/MS; By MS/MS; By MS/MS; By MS/MS	24.3; 38.4; 36.3; 27; 31.6; 30.4; 33.8; 30.4; 34.2	268590; 211740; 291560; 53284; 362490; 278940; 648420; 527120; 831930	261880; 191860; 221220; 60852; 237860; 180090; 354540; 339650; 400500	12; 20; 16; 4; 6; 8; 19; 12; 23
alr2350	0.912264	1	false	truth	1.01952	0.373308	0.318607	0.0364872	0.731259	1.385	2; 0; 1; 3; 2; 2; 6; 3; 5	2; 0; 1; 3; 2; 2; 6; 3; 5	2; 0; 1; 3; 2; 2; 6; 3; 5	2	By MS/MS; By matching; By MS/MS; By MS/MS; By MS/MS; By MS/MS; By MS/MS; By MS/MS; By MS/MS	13.1; 0; 4.2; 19.8; 4.5; 12.1; 34.5; 19.2; 30.4	10867; 0; 11055; 33937; 5351.8; 25347; 39273; 14168; 25373	0; 0; 0; 14030; 6761.8; 0; 15345; 0; 12003	4; 0; 2; 6; 1; 0; 8; 3; 5	2; 2; 3; 1; 3; 4; 2; 3; 4	2; 2; 3; 1; 3; 4; 2; 3; 4	2; 2; 3; 1; 3; 4; 2; 3; 4	3	By MS/MS; By MS/MS; By MS/MS; By MS/MS; By matching; By MS/MS; By matching; By MS/MS; By MS/MS	10.9; 10.9; 14.1; 4.2; 15.7; 24.3; 4.5; 14.4; 25.6	10734; 12609; 26190; 5811.5; 17343; 5520.6; 6941.3; 17872; 0	9388.8; 11303; 14396; 0; 9682.6; 0; 8088.9; 14244; 0	2; 1; 1; 2; 0; 2; 0; 1; 4
alr2372	0.129914	1	false	truth	0.820161	0.246073	0.18351	0.015986	0.648011	1.01896	3; 5; 4; 4; 1; 4; 3; 4; 3	3; 5; 4; 4; 1; 4; 3; 4; 3	3; 5; 4; 4; 1; 4; 3; 4; 3	4	By matching; By MS/MS; By MS/MS; By MS/MS; By matching; By matching; By MS/MS; By MS/MS; By MS/MS	10.6; 23.9; 18.9; 18.6; 4.7; 18.6; 10.6; 19.8; 13	21276; 19308; 20894; 11928; 3252; 13196; 6932.7; 3878.4; 4617.4	11638; 9238.2; 11093; 8422.7; 0; 6251.5; 7949.3; 6267.6; 0	0; 1; 2; 1; 0; 0; 2; 1; 1	5; 1; 2; 5; 1; 5; 4; 2; 4	5; 1; 2; 5; 1; 5; 4; 2; 4	5; 1; 2; 5; 1; 5; 4; 2; 4	4	By MS/MS; By MS/MS; By MS/MS; By MS/MS; By MS/MS; By MS/MS; By MS/MS; By matching; By MS/MS	22.7; 5; 8; 23.6; 3.8; 19.2; 20.6; 6.8; 15.3	19289; 0; 5920.4; 32035; 13600; 19532; 21882; 11176; 18516	10370; 0; 0; 12609; 0; 13188; 12161; 0; 0	0; 1; 1; 3; 1; 7; 5; 0; 2
alr2405	0.160592	1	false	false	1.07261	0.0575787	#N/A	#N/A	#N/A	#N/A	0; 0; 2; 2; 0; 2; 0; 2; 1	0; 0; 2; 2; 0; 2; 0; 2; 1	0; 0; 2; 2; 0; 2; 0; 2; 1	1	By matching; By matching; By matching; By MS/MS; By matching; By matching; By matching; By MS/MS; By matching	0; 0; 18.2; 22.4; 0; 17.1; 0; 11.8; 10.6	0; 0; 18678; 21270; 0; 34965; 0; 3669.3; 4087.1	0; 0; 16000; 16462; 0; 14728; 0; 0; 0	0; 0; 0; 1; 0; 0; 0; 1; 0	0; 1; 1; 1; 1; 1; 1; 2; 2	0; 1; 1; 1; 1; 1; 1; 2; 2	0; 1; 1; 1; 1; 1; 1; 2; 2	1	By matching; By matching; By matching; By MS/MS; By MS/MS; By MS/MS; By matching; By matching; By MS/MS	0; 6.5; 6.5; 10.6; 10.6; 10.6; 6.5; 17.1; 20	0; 16733; 13949; 3509.9; 11319; 21521; 4908.5; 23161; 5970.3	0; 0; 0; 0; 0; 0; 0; 16440; 0	0; 0; 0; 2; 2; 2; 0; 0; 1
alr2440	0.977124	1	false	truth	0.983878	0.875985	1.00574	0.961036	0.45476	50.0468	3; 2; 3; 2; 1; 4; 3; 3; 3	3; 2; 3; 2; 1; 4; 3; 3; 3	3; 2; 3; 2; 1; 4; 3; 3; 3	3	By MS/MS; By MS/MS; By matching; By MS/MS; By MS/MS; By matching; By MS/MS; By MS/MS; By MS/MS	12.9; 8.4; 12.3; 8.4; 4.5; 18; 12; 11.4; 11.4	2882.1; 7063.6; 13692; 10671; 0; 96926; 7516.2; 10242; 5687.5	0; 0; 7362.8; 0; 0; 14591; 11305; 11421; 0	1; 1; 0; 1; 1; 0; 2; 1; 2	2; 0; 1; 3; 2; 3; 1; 3; 2	2; 0; 1; 3; 2; 3; 1; 3; 2	2; 0; 1; 3; 2; 3; 1; 3; 2	2	By matching; By matching; By matching; By MS/MS; By matching; By MS/MS; By matching; By matching; By MS/MS	7.5; 0; 4.5; 11.4; 9; 11.4; 5.4; 12.6; 7.5	7683.8; 0; 2188.1; 8039.3; 2103.6; 28598; 3074; 11634; 11840	0; 0; 0; 4708; 0; 24959; 0; 9691.4; 0	0; 0; 0; 1; 0; 2; 0; 0; 0
alr2445	0.686697	1	false	truth	0.94037	0.42391	0.246699	0.0289834	0.716516	1.22036	4; 4; 5; 3; 3; 3; 4; 2; 5	4; 4; 5; 3; 3; 3; 4; 2; 5	4; 4; 5; 3; 3; 3; 4; 2; 5	4	By MS/MS; By MS/MS; By MS/MS; By MS/MS; By MS/MS; By MS/MS; By MS/MS; By matching; By MS/MS	23; 23; 26.6; 19; 16.1; 13.3; 17.3; 12.1; 32.3	65820; 36815; 58753; 23628; 24505; 19425; 11301; 6238.1; 22008	21472; 20437; 22614; 14729; 24183; 12259; 10686; 24725; 12624	8; 6; 7; 6; 4; 0; 1; 0; 2	4; 4; 4; 2; 3; 3; 2; 3; 4	4; 4; 4; 2; 3; 3; 2; 3; 4	4; 4; 4; 2; 3; 3; 2; 3; 4	3	By MS/MS; By MS/MS; By MS/MS; By MS/MS; By MS/MS; By MS/MS; By MS/MS; By MS/MS; By MS/MS	23; 23; 22.6; 12.1; 16.1; 19; 12.9; 19; 23	33099; 30678; 20532; 52299; 52063; 51970; 39035; 19873; 42013	21890; 18640; 14884; 36858; 26348; 16019; 19842; 11787; 19031	6; 8; 4; 2; 2; 1; 2; 0; 4
alr2447	0.0855922	1	false	truth	0.740792	0.275251	0.214913	0.00814671	0.530996	0.962756	2; 3; 1; 2; 0; 1; 3; 3; 5	2; 3; 1; 2; 0; 1; 3; 3; 5	2; 3; 1; 2; 0; 1; 3; 3; 5	2	By MS/MS; By matching; By MS/MS; By MS/MS; By matching; By matching; By MS/MS; By MS/MS; By MS/MS	6.9; 9.6; 3.2; 6.9; 0; 3.2; 12.8; 9.8; 15.2	10903; 12384; 8613.8; 9710.8; 0; 5328.1; 15072; 14148; 27885	6509.6; 5784.2; 0; 7858.6; 0; 0; 0; 11477; 11527	1; 0; 2; 2; 0; 0; 2; 3; 4	2; 3; 2; 2; 2; 3; 1; 3; 4	2; 3; 2; 2; 2; 3; 1; 3; 4	2; 3; 2; 2; 2; 3; 1; 3; 4	2	By matching; By MS/MS; By MS/MS; By MS/MS; By matching; By MS/MS; By MS/MS; By matching; By MS/MS	6.9; 8.5; 5.9; 6.9; 6.9; 8.8; 3.7; 8.5; 11.4	7571.5; 14199; 10087; 25353; 23597; 29438; 15436; 20340; 19728	8314.4; 11497; 10394; 16618; 12743; 14486; 0; 13059; 8526.4	0; 2; 1; 2; 0; 2; 1; 0; 2
alr2450	0.262798	1	false	truth	0.850756	0.339609	0.204534	0.0304843	0.668066	1.08695	6; 6; 6; 7; 6; 8; 5; 6; 8	6; 6; 6; 7; 6; 8; 5; 6; 8	6; 6; 6; 7; 6; 8; 5; 6; 8	6	By MS/MS; By MS/MS; By MS/MS; By MS/MS; By MS/MS; By MS/MS; By MS/MS; By MS/MS; By MS/MS	18.7; 18.7; 20.6; 24; 19.1; 25.1; 18.3; 20.6; 24.8	50172; 49862; 26345; 59012; 81391; 143990; 123100; 48268; 47338	31789; 29327; 33189; 41731; 50997; 51908; 41438; 41087; 25940	2; 2; 2; 4; 6; 3; 2; 2; 3	6; 6; 6; 7; 7; 7; 7; 3; 7	6; 6; 6; 7; 7; 7; 7; 3; 7	6; 6; 6; 7; 7; 7; 7; 3; 7	7	By MS/MS; By MS/MS; By MS/MS; By MS/MS; By MS/MS; By MS/MS; By MS/MS; By matching; By MS/MS	21; 19.7; 21.4; 21.7; 23.3; 21.4; 23.3; 9.3; 22.5	37966; 87483; 21260; 53197; 143480; 87907; 77780; 6288; 41028	49358; 42911; 59260; 36738; 45796; 31598; 66201; 0; 42606	4; 3; 3; 3; 6; 5; 12; 0; 5
alr2535	0.633585	1	false	truth	1.12334	0.579021	0.463094	0.0430405	0.697779	1.64994	2; 2; 4; 2; 3; 0; 3; 1; 3	2; 2; 4; 2; 3; 0; 3; 1; 3	2; 2; 4; 2; 3; 0; 3; 1; 3	2	By MS/MS; By MS/MS; By MS/MS; By MS/MS; By MS/MS; By matching; By MS/MS; By MS/MS; By MS/MS	9; 8.2; 27.2; 13.1; 17.2; 0; 23.1; 4.9; 17.2	43319; 12269; 20480; 3600.2; 13797; 0; 16875; 34018; 25663	34098; 0; 17684; 0; 10287; 0; 18880; 0; 17270	1; 1; 5; 1; 2; 0; 3; 1; 2	3; 3; 2; 3; 3; 2; 3; 3; 1	3; 3; 2; 3; 3; 2; 3; 3; 1	3; 3; 2; 3; 3; 2; 3; 3; 1	3	By matching; By MS/MS; By MS/MS; By MS/MS; By MS/MS; By MS/MS; By MS/MS; By matching; By matching	22; 21.3; 9; 17.2; 17.2; 18.3; 17.9; 23.9; 8.2	17125; 18341; 12333; 59338; 40803; 7221.3; 27801; 20334; 6272.3	13887; 23438; 19447; 23341; 15170; 0; 12863; 0; 0	0; 3; 1; 2; 1; 3; 1; 0; 0
alr2542	0.673992	1	false	truth	0.927624	0.378756	0.276107	0.0669448	0.700693	1.28767	2; 3; 5; 6; 4; 4; 3; 5; 3	2; 3; 5; 6; 4; 4; 3; 5; 3	2; 3; 5; 6; 4; 4; 3; 5; 3	4	By MS/MS; By MS/MS; By MS/MS; By MS/MS; By MS/MS; By MS/MS; By MS/MS; By MS/MS; By matching	13.3; 16.2; 40.6; 49.3; 25.2; 27.7; 19.8; 31.7; 23.7	12939; 10218; 20965; 35847; 25824; 33689; 30797; 22577; 27294	21837; 18910; 10476; 12997; 15845; 13405; 25935; 23227; 17074	1; 1; 1; 1; 2; 0; 4; 5; 0	3; 1; 1; 5; 4; 2; 4; 2; 3	3; 1; 1; 5; 4; 2; 4; 2; 3	3; 1; 1; 5; 4; 2; 4; 2; 3	3	By MS/MS; By MS/MS; By matching; By MS/MS; By MS/MS; By MS/MS; By MS/MS; By matching; By MS/MS	23.7; 11.2; 4.3; 34.2; 27.7; 15.1; 27.3; 12.2; 13.3	21089; 0; 62.4; 28997; 46111; 6696; 17072; 19795; 23305	18081; 0; 0; 16228; 20389; 0; 17333; 0; 24768	0; 0; 0; 2; 1; 1; 3; 0; 1
alr2708	0.826279	1	false	truth	0.980339	0.255303	0.152124	0.0157887	0.841922	1.15021	5; 4; 5; 4; 3; 4; 4; 4; 3	5; 4; 5; 4; 3; 4; 4; 4; 3	5; 4; 5; 4; 3; 4; 4; 4; 3	4	By MS/MS; By MS/MS; By MS/MS; By MS/MS; By MS/MS; By MS/MS; By MS/MS; By MS/MS; By MS/MS	19.8; 16.6; 19.2; 16.3; 12.2; 15.7; 14.8; 16.3; 9.9	71532; 122110; 58432; 68814; 77684; 110230; 58188; 118320; 22031	60957; 63955; 59247; 40251; 48597; 49943; 55633; 59827; 0	5; 4; 8; 5; 4; 2; 6; 5; 4	4; 4; 5; 5; 4; 3; 3; 3; 5	4; 4; 5; 5; 4; 3; 3; 3; 5	4; 4; 5; 5; 4; 3; 3; 3; 5	4	By MS/MS; By MS/MS; By MS/MS; By MS/MS; By MS/MS; By MS/MS; By MS/MS; By MS/MS; By MS/MS	14.2; 16; 19.2; 18.9; 14.8; 12.2; 12.2; 12.2; 18.3	61220; 32059; 57944; 143700; 160990; 94026; 59373; 92631; 65858	59257; 44788; 46310; 74668; 77280; 66132; 58783; 48586; 50099	2; 1; 10; 6; 3; 5; 5; 1; 4
alr2751	0.172489	1	false	truth	1.32931	0.732995	0.456449	0.0608331	0.936608	1.89422	4; 1; 4; 5; 4; 3; 3; 3; 2	4; 1; 4; 5; 4; 3; 3; 3; 2	4; 1; 4; 5; 4; 3; 3; 3; 2	3	By MS/MS; By matching; By MS/MS; By MS/MS; By MS/MS; By MS/MS; By MS/MS; By MS/MS; By MS/MS	21.6; 6.4; 22; 28.4; 17.9; 15.6; 15.6; 18.3; 12.4	31879; 16386; 24591; 50424; 30742; 61640; 9120.6; 28027; 6734.6	37796; 17281; 26265; 41510; 23951; 32805; 11994; 26079; 0	4; 0; 4; 7; 1; 0; 2; 6; 4	4; 5; 3; 3; 4; 4; 4; 3; 3	4; 5; 3; 3; 4; 4; 4; 3; 3	4; 5; 3; 3; 4; 4; 4; 3; 3	4	By MS/MS; By MS/MS; By MS/MS; By MS/MS; By MS/MS; By MS/MS; By MS/MS; By matching; By matching	19.3; 28.4; 19.3; 16.5; 24.8; 20.2; 24.8; 16.1; 18.3	26255; 25567; 37040; 72095; 44193; 3190.8; 40910; 10648; 17816	22518; 19286; 33106; 31119; 25676; 0; 19517; 10123; 11020	3; 4; 2; 3; 1; 3; 3; 0; 0
alr2758	0.0258578	1	false	truth	1.49891	0.396551	0.383029	0.0311071	1.15494	1.93913	1; 2; 3; 3; 2; 1; 5; 4; 5	1; 2; 3; 3; 2; 1; 5; 4; 5	1; 2; 3; 3; 2; 1; 5; 4; 5	3	By MS/MS; By MS/MS; By MS/MS; By MS/MS; By MS/MS; By MS/MS; By MS/MS; By MS/MS; By MS/MS	2.5; 6.9; 12.5; 6.4; 6.4; 3.4; 18.9; 15.7; 14.7	2322.9; 0; 15698; 10310; 3287.3; 12035; 28269; 26770; 31667	0; 0; 19708; 19926; 0; 0; 18371; 16759; 12532	1; 1; 2; 3; 1; 1; 4; 4; 3	4; 0; 1; 3; 0; 2; 4; 3; 4	4; 0; 1; 3; 0; 2; 4; 3; 4	4; 0; 1; 3; 0; 2; 4; 3; 4	3	By MS/MS; By matching; By matching; By MS/MS; By matching; By matching; By MS/MS; By matching; By MS/MS	16; 0; 2.5; 9.8; 0; 6.9; 12.3; 8.8; 12.3	20695; 0; 315.42; 11880; 0; 4087.5; 19255; 5076.2; 15965	10165; 0; 0; 0; 0; 0; 11946; 0; 12618	0; 0; 0; 1; 0; 0; 1; 0; 1
alr2762	0.314619	1	false	false	0.657573	0.322444	0.456801	0.366523	0.34945	1.72663	1; 1; 1; 2; 1; 1; 1; 3; 1	1; 1; 1; 2; 1; 1; 1; 3; 1	1; 1; 1; 2; 1; 1; 1; 3; 1	1	By matching; By MS/MS; By matching; By MS/MS; By matching; By MS/MS; By matching; By MS/MS; By MS/MS	7.5; 11; 11; 23.7; 7.5; 12.7; 12.7; 31.2; 12.7	7184.7; 7535.4; 5232.7; 17706; 4520.6; 6340.3; 2559.8; 7750.9; 0	0; 0; 0; 8285.9; 0; 0; 0; 5988.3; 0	0; 1; 0; 1; 0; 1; 0; 3; 1	0; 2; 2; 2; 3; 1; 1; 1; 1	0; 2; 2; 2; 3; 1; 1; 1; 1	0; 2; 2; 2; 3; 1; 1; 1; 1	1	By matching; By MS/MS; By matching; By MS/MS; By MS/MS; By MS/MS; By MS/MS; By MS/MS; By matching	0; 23.7; 18.5; 23.7; 31.2; 12.7; 12.7; 11; 7.5	0; 6403.6; 7117.3; 46842; 34644; 0; 0; 0; 7185.2	0; 5086.4; 0; 19237; 13455; 0; 0; 0; 0	0; 1; 0; 3; 3; 1; 2; 1; 0
alr2771	0.276815	1	false	truth	1.17871	0.453044	0.28798	0.0202247	0.911089	1.49499	6; 6; 5; 4; 4; 5; 5; 6; 5	6; 6; 5; 4; 4; 5; 5; 6; 5	6; 6; 5; 4; 4; 5; 5; 6; 5	5	By MS/MS; By MS/MS; By MS/MS; By MS/MS; By MS/MS; By MS/MS; By MS/MS; By MS/MS; By MS/MS	17.1; 17.6; 13.1; 10.1; 13.7; 14.2; 13.9; 18.5; 15.5	45734; 49663; 67718; 4360.6; 21070; 20254; 22190; 37660; 30075	55102; 28779; 27180; 0; 28161; 0; 39246; 29614; 26065	7; 6; 7; 5; 2; 4; 5; 2; 6	6; 3; 4; 6; 4; 4; 5; 2; 7	6; 3; 4; 6; 4; 4; 5; 2; 7	6; 3; 4; 6; 4; 4; 5; 2; 7	4	By MS/MS; By MS/MS; By MS/MS; By MS/MS; By MS/MS; By MS/MS; By MS/MS; By matching; By MS/MS	16.3; 9.2; 8.9; 15.5; 10.3; 13.7; 13.5; 5.7; 15.6	41036; 27077; 24467; 70969; 54194; 30686; 47051; 19482; 51643	34793; 24037; 20248; 41276; 28341; 23281; 25443; 39194; 25702	3; 2; 3; 5; 2; 2; 5; 0; 4
alr2811	0.0644484	1	false	truth	0.66911	0.600022	#N/A	1.55605	#N/A	#N/A	4; 3; 2; 2; 0; 5; 1; 1; 4	4; 3; 2; 2; 0; 5; 1; 1; 4	4; 3; 2; 2; 0; 5; 1; 1; 4	2	By MS/MS; By MS/MS; By MS/MS; By MS/MS; By matching; By MS/MS; By MS/MS; By matching; By MS/MS	12.6; 10.8; 7; 7; 0; 17.3; 6.1; 4.7; 16.4	12549; 10170; 0; 7268.5; 0; 24430; 0; 2344.9; 10251	6989.2; 7812.7; 0; 0; 0; 11672; 0; 0; 6874.3	3; 2; 2; 2; 0; 1; 1; 0; 2	4; 3; 2; 2; 3; 3; 2; 1; 3	4; 3; 2; 2; 3; 3; 2; 1; 3	4; 3; 2; 2; 3; 3; 2; 1; 3	3	By MS/MS; By MS/MS; By matching; By MS/MS; By MS/MS; By MS/MS; By MS/MS; By matching; By MS/MS	15.5; 11.7; 5.2; 7; 11.2; 10.8; 7; 3.3; 10.8	13945; 2977.7; 2823.6; 0; 14841; 8836.6; 5472.2; 0; 6707.6	17481; 0; 0; 0; 0; 0; 0; 0; 4782	2; 1; 0; 1; 0; 1; 1; 0; 1
alr2877	0.511392	1	false	truth	0.822137	0.524628	0.401451	0.165697	0.516555	1.45428	0; 3; 4; 2; 4; 3; 5; 5; 5	0; 3; 4; 2; 4; 3; 5; 5; 5	0; 3; 4; 2; 4; 3; 5; 5; 5	4	By matching; By matching; By matching; By MS/MS; By MS/MS; By MS/MS; By MS/MS; By MS/MS; By MS/MS	0; 7.4; 13.1; 7; 14.4; 11.8; 16.8; 17.5; 16.6	0; 31850; 6984.8; 18822; 30206; 23562; 41938; 51309; 52553	0; 0; 9102.4; 13691; 17862; 13117; 29566; 27165; 31218	0; 0; 0; 4; 2; 0; 5; 3; 5	2; 4; 2; 1; 3; 3; 6; 3; 6	2; 4; 2; 1; 3; 3; 6; 3; 6	2; 4; 2; 1; 3; 3; 6; 3; 6	3	By matching; By matching; By matching; By MS/MS; By MS/MS; By MS/MS; By MS/MS; By MS/MS; By MS/MS	5.5; 11.4; 7.2; 3.5; 9.8; 9.4; 19; 8.5; 21.8	5717.1; 6133.6; 5793.4; 41403; 11348; 28472; 85525; 64626; 67117	7848.7; 0; 0; 20707; 0; 0; 42984; 30279; 32691	0; 0; 0; 2; 1; 2; 8; 0; 7
alr2880	0.0348662	1	false	truth	Infinity	#N/A	#N/A	#N/A	#N/A	#N/A	1; 0; 1; 3; 2; 2; 2; 3; 3	1; 0; 1; 3; 2; 2; 2; 3; 3	1; 0; 0; 2; 2; 2; 1; 2; 2	2	By MS/MS; By matching; By matching; By MS/MS; By MS/MS; By MS/MS; By MS/MS; By MS/MS; By MS/MS	5.9; 0; 3.5; 12.1; 8.7; 13.1; 8; 8; 13.5	0; 0; 2696.5; 10384; 2900.2; 9319.5; 7921; 7256.4; 18265	0; 0; 0; 6679.9; 0; 0; 5715.1; 0; 9956.4	1; 0; 0; 1; 2; 1; 1; 2; 2	1; 1; 1; 1; 1; 1; 1; 1; 0	1; 1; 1; 1; 1; 1; 1; 1; 0	0; 0; 1; 0; 0; 1; 0; 0; 0	0	By matching; By matching; By matching; By MS/MS; By matching; By matching; By MS/MS; By matching; By matching	3.5; 3.5; 4.5; 3.5; 3.5; 4.5; 3.5; 3.5; 0	3626; 2572.9; 1571.2; 8111.9; 7641.5; 1648.3; 4610.5; 6486.9; 0	0; 0; 0; 0; 0; 0; 0; 0; 0	0; 0; 0; 0; 0; 0; 1; 0; 0
alr2886	0.0119928	1	false	truth	0	#N/A	#N/A	#N/A	#N/A	#N/A	2; 1; 2; 1; 1; 0; 1; 1; 1	2; 1; 2; 1; 1; 0; 1; 1; 1	2; 1; 2; 1; 1; 0; 1; 1; 1	1	By MS/MS; By MS/MS; By MS/MS; By matching; By matching; By matching; By MS/MS; By MS/MS; By matching	5.6; 3.5; 5.6; 3.1; 3.1; 0; 3.5; 3.5; 2.7	8371.3; 0; 8791.4; 2100.6; 9953.9; 0; 8830.2; 19876; 7647.8	0; 0; 0; 0; 0; 0; 0; 0; 0	2; 1; 3; 0; 0; 0; 1; 1; 0	2; 1; 1; 1; 0; 3; 2; 3; 4	2; 1; 1; 1; 0; 3; 2; 3; 4	2; 1; 1; 1; 0; 3; 2; 3; 4	2	By matching; By MS/MS; By MS/MS; By MS/MS; By matching; By MS/MS; By MS/MS; By MS/MS; By MS/MS	5.8; 2.1; 2.1; 3.7; 0; 9.2; 5.6; 9.2; 14.1	16187; 0; 7535.3; 0; 0; 16326; 29760; 45477; 22059	0; 0; 0; 0; 0; 0; 17687; 13661; 9256.4	0; 2; 1; 1; 0; 4; 3; 1; 4
alr2887	0.807703	1	false	truth	0.930732	0.681457	0.483379	0.110586	0.521005	1.57191	5; 3; 5; 4; 3; 4; 5; 2; 5	5; 3; 5; 4; 3; 4; 5; 2; 5	5; 3; 5; 4; 3; 4; 5; 2; 5	4	By MS/MS; By matching; By MS/MS; By MS/MS; By MS/MS; By MS/MS; By MS/MS; By matching; By MS/MS	7.8; 4.4; 8.2; 6.6; 4.4; 7.4; 8.4; 3.2; 7.5	40352; 38110; 61454; 50857; 41993; 24090; 20832; 4593.4; 17291	27589; 31792; 0; 50882; 21006; 0; 15602; 0; 12695	3; 0; 3; 4; 1; 1; 3; 0; 3	3; 4; 3; 3; 4; 7; 3; 4; 4	3; 4; 3; 3; 4; 7; 3; 4; 4	3; 4; 3; 3; 4; 7; 3; 4; 4	4	By MS/MS; By MS/MS; By MS/MS; By MS/MS; By MS/MS; By MS/MS; By MS/MS; By MS/MS; By MS/MS	5.4; 6.5; 5.8; 6.7; 6.9; 11.6; 4.6; 7.3; 8.4	21302; 58273; 21889; 76228; 55999; 118970; 15624; 15379; 25804	9856.9; 35581; 40234; 0; 21400; 50277; 26350; 14924; 0	1; 2; 3; 1; 1; 2; 2; 1; 3
alr2938	0.134138	1	false	truth	1.52381	1.09851	0.639293	0.0647208	0.959857	2.29866	4; 4; 6; 7; 5; 5; 7; 5; 5	4; 4; 6; 7; 5; 5; 7; 5; 5	4; 4; 6; 7; 5; 5; 7; 5; 5	5	By MS/MS; By MS/MS; By MS/MS; By MS/MS; By MS/MS; By MS/MS; By MS/MS; By MS/MS; By MS/MS	29.5; 29.5; 52; 52.5; 47; 47; 61.5; 30; 42.5	166080; 97369; 253450; 112000; 156870; 189600; 152140; 154200; 120820	174650; 73260; 144070; 24983; 66399; 80829; 45839; 71795; 79428	25; 12; 22; 31; 20; 4; 22; 19; 15	5; 5; 7; 4; 4; 7; 4; 5; 4	5; 5; 7; 4; 4; 7; 4; 5; 4	5; 5; 7; 4; 4; 7; 4; 5; 4	5	By MS/MS; By MS/MS; By MS/MS; By MS/MS; By MS/MS; By MS/MS; By MS/MS; By MS/MS; By MS/MS	30; 34.5; 41.5; 29.5; 29.5; 52.5; 27; 34.5; 37.5	107240; 97439; 93737; 122560; 166300; 210640; 160330; 143660; 121420	42091; 92949; 31951; 65621; 71001; 40341; 36692; 57003; 78901	15; 21; 16; 13; 7; 13; 11; 6; 14
alr2954	0.125185	1	false	truth	0.777845	0.296538	0.227746	0.00589887	0.553993	1.01093	3; 0; 3; 3; 4; 0; 3; 2; 4	3; 0; 3; 3; 4; 0; 3; 2; 4	3; 0; 3; 3; 4; 0; 3; 2; 4	3	By MS/MS; By matching; By MS/MS; By MS/MS; By MS/MS; By matching; By MS/MS; By MS/MS; By MS/MS	22.5; 0; 22.5; 29.7; 36.3; 0; 29.7; 11.5; 36.3	18764; 0; 16718; 24815; 20745; 0; 18295; 8756.4; 28231	12020; 0; 8538.3; 18452; 5286.7; 0; 12442; 0; 14703	0; 0; 3; 3; 1; 0; 5; 2; 4	2; 2; 0; 3; 1; 2; 4; 1; 3	2; 2; 0; 3; 1; 2; 4; 1; 3	2; 2; 0; 3; 1; 2; 4; 1; 3	2	By MS/MS; By MS/MS; By matching; By MS/MS; By MS/MS; By matching; By MS/MS; By MS/MS; By MS/MS	24.7; 18.1; 0; 31.3; 11; 12.1; 23.1; 11; 22.5	11642; 17931; 0; 529.99; 0; 10741; 36573; 25849; 12318	0; 15477; 0; 0; 0; 0; 16447; 16682; 13480	1; 3; 0; 3; 1; 0; 3; 1; 2
alr2982	0.0282234	1	false	false	1.3626	0.146894	#N/A	0.0330303	#N/A	#N/A	2; 1; 1; 0; 1; 1; 0; 1; 0	2; 1; 1; 0; 1; 1; 0; 1; 0	2; 1; 1; 0; 1; 1; 0; 1; 0	1	By matching; By matching; By matching; By matching; By matching; By matching; By matching; By MS/MS; By matching	8.5; 4.8; 3.8; 0; 4.8; 4.8; 0; 4.8; 0	10814; 2946.9; 1119.4; 0; 1748; 2660.7; 0; 8484.7; 0	7857; 0; 0; 0; 0; 0; 0; 0; 0	0; 0; 0; 0; 0; 0; 0; 2; 0	0; 1; 2; 0; 0; 2; 1; 0; 3	0; 1; 2; 0; 0; 2; 1; 0; 3	0; 1; 2; 0; 0; 2; 1; 0; 3	1	By matching; By matching; By matching; By matching; By matching; By MS/MS; By MS/MS; By matching; By MS/MS	0; 4.8; 6.3; 0; 0; 8.5; 4.8; 0; 11.1	0; 685.26; 6547.7; 0; 0; 8785; 573.86; 0; 10979	0; 0; 5258.3; 0; 0; 5798.9; 0; 0; 5903.9	0; 0; 0; 0; 0; 1; 2; 0; 3
alr2999	0.137642	1	false	truth	0.840067	0.253361	0.147446	0.0270375	0.712118	1.0147	22; 20; 20; 22; 19; 19; 23; 21; 18	22; 20; 20; 22; 19; 19; 23; 21; 18	19; 18; 17; 20; 17; 16; 20; 19; 16	18	By MS/MS; By MS/MS; By MS/MS; By MS/MS; By MS/MS; By MS/MS; By MS/MS; By MS/MS; By MS/MS	40; 34.6; 32.8; 39; 33.7; 30.8; 40.4; 36.5; 31.8	225450; 258610; 249920; 311020; 563830; 429630; 255000; 241400; 164590	164470; 179110; 158390; 191350; 188230; 149540; 185020; 144330; 155320	23; 20; 22; 42; 19; 12; 44; 34; 34	18; 19; 18; 20; 20; 20; 21; 21; 24	18; 19; 18; 20; 20; 20; 21; 21; 24	16; 15; 17; 17; 18; 18; 18; 19; 21	18	By MS/MS; By MS/MS; By MS/MS; By MS/MS; By MS/MS; By MS/MS; By MS/MS; By MS/MS; By MS/MS	28.6; 33.8; 30.4; 36.4; 34.7; 35.6; 34.8; 36.2; 40.9	158400; 156930; 164540; 609310; 482580; 572950; 429780; 435110; 407590	143040; 147680; 112270; 272060; 292680; 243570; 257660; 206820; 221480	12; 11; 15; 36; 28; 38; 34; 7; 28
alr3074	0.239959	1	false	truth	0.401723	0.251691	#N/A	1.11563	#N/A	#N/A	0; 1; 1; 2; 4; 1; 2; 3; 1	0; 1; 1; 2; 4; 1; 2; 3; 1	0; 1; 1; 2; 4; 1; 2; 3; 1	1	By matching; By MS/MS; By matching; By MS/MS; By matching; By matching; By MS/MS; By MS/MS; By MS/MS	0; 4; 3.4; 7.4; 15.2; 3.4; 7.4; 14.9; 4	0; 2932.7; 8326; 3975.6; 30244; 92055; 10337; 9011.2; 8487.8	0; 0; 0; 0; 11922; 0; 0; 0; 0	0; 1; 0; 2; 0; 0; 2; 3; 1	1; 1; 1; 2; 2; 3; 2; 2; 1	1; 1; 1; 2; 2; 3; 2; 2; 1	1; 1; 1; 2; 2; 3; 2; 2; 1	2	By matching; By matching; By matching; By MS/MS; By MS/MS; By MS/MS; By MS/MS; By matching; By MS/MS	4; 3.4; 3.4; 10.9; 7.4; 16; 12.6; 13.2; 5.2	1842.7; 13811; 8727.6; 27406; 73504; 61990; 17901; 10210; 0	0; 0; 0; 0; 41624; 46442; 10633; 0; 0	0; 0; 0; 1; 1; 4; 1; 0; 1
alr3101	0.307466	1	false	truth	1.29772	1.10452	#N/A	1.76877	#N/A	#N/A	2; 1; 3; 2; 2; 2; 2; 1; 1	2; 1; 3; 2; 2; 2; 2; 1; 1	2; 1; 3; 2; 2; 2; 2; 1; 1	2	By MS/MS; By MS/MS; By MS/MS; By MS/MS; By MS/MS; By MS/MS; By MS/MS; By matching; By MS/MS	7; 6.5; 13; 7; 13; 12.6; 7; 6.5; 6.5	23047; 12687; 23050; 14729; 21010; 27984; 2664.5; 11802; 9047.7	21136; 0; 12522; 0; 11395; 0; 0; 0; 0	3; 1; 1; 2; 1; 2; 1; 0; 1	2; 0; 1; 1; 1; 1; 1; 1; 3	2; 0; 1; 1; 1; 1; 1; 1; 3	2; 0; 1; 1; 1; 1; 1; 1; 3	1	By matching; By matching; By MS/MS; By MS/MS; By matching; By MS/MS; By MS/MS; By matching; By MS/MS	12.6; 0; 6; 6.5; 6.5; 6.5; 6.5; 6; 13	5447.4; 0; 0; 17902; 15481; 0; 8337.5; 26169; 38903	4644.1; 0; 0; 0; 0; 0; 0; 0; 17470	0; 0; 1; 1; 0; 1; 1; 0; 1
alr3106	0.868373	1	false	truth	0.943095	0.645725	0.61736	0.242302	0.47399	2.01538	2; 2; 3; 2; 1; 1; 0; 2; 1	2; 2; 3; 2; 1; 1; 0; 2; 1	2; 2; 3; 2; 1; 1; 0; 2; 1	2	By MS/MS; By MS/MS; By MS/MS; By MS/MS; By MS/MS; By matching; By matching; By MS/MS; By MS/MS	26.1; 26.1; 36.1; 22.7; 12.6; 12.6; 0; 22.7; 12.6	18237; 16330; 20710; 12090; 21951; 14058; 0; 11611; 0	14404; 8016.5; 15132; 0; 0; 0; 0; 0; 0	2; 2; 4; 1; 1; 0; 0; 2; 1	2; 2; 2; 3; 2; 1; 2; 2; 2	2; 2; 2; 3; 2; 1; 2; 2; 2	2; 2; 2; 3; 2; 1; 2; 2; 2	2	By MS/MS; By matching; By MS/MS; By MS/MS; By MS/MS; By MS/MS; By MS/MS; By MS/MS; By MS/MS	26.1; 26.1; 26.1; 46.2; 22.7; 12.6; 26.1; 26.1; 26.1	22784; 4056.9; 19558; 12378; 13165; 29161; 12771; 19632; 26310	19266; 2846.5; 14114; 12714; 0; 0; 0; 0; 17866	3; 0; 2; 2; 1; 2; 2; 2; 2
alr3183	0.00118511	1	false	truth	0.594324	0.246439	0.36467	0.362267	0.364037	1.49983	2; 2; 2; 2; 3; 2; 3; 1; 3	2; 2; 2; 2; 3; 2; 3; 1; 3	2; 2; 2; 2; 3; 2; 3; 1; 3	2	By MS/MS; By MS/MS; By MS/MS; By MS/MS; By MS/MS; By MS/MS; By MS/MS; By MS/MS; By MS/MS	22.9; 24.8; 15; 16.3; 32; 15; 22.2; 9.2; 28.8	12320; 10090; 8047; 0; 12128; 7230.6; 25774; 0; 31031	16997; 14680; 14027; 0; 0; 0; 19784; 0; 0	1; 1; 2; 2; 1; 1; 4; 2; 2	0; 0; 1; 3; 3; 2; 1; 0; 2	0; 0; 1; 3; 3; 2; 1; 0; 2	0; 0; 1; 3; 3; 2; 1; 0; 2	1	By matching; By matching; By MS/MS; By MS/MS; By MS/MS; By MS/MS; By MS/MS; By matching; By MS/MS	0; 0; 9.2; 32; 32; 16.3; 15.7; 0; 24.8	0; 0; 7941.2; 35348; 29327; 8960.8; 0; 0; 6164.7	0; 0; 0; 27424; 31469; 0; 0; 0; 0	0; 0; 1; 3; 2; 2; 1; 0; 1
alr3265	0.931451	1	false	truth	1.01821	0.485592	0.380619	0.0741413	0.695861	1.50362	3; 4; 4; 5; 3; 8; 3; 2; 3	3; 4; 4; 5; 3; 8; 3; 2; 3	3; 4; 4; 5; 3; 8; 3; 2; 3	3	By MS/MS; By MS/MS; By MS/MS; By MS/MS; By MS/MS; By MS/MS; By MS/MS; By MS/MS; By MS/MS	15; 19.2; 15; 21.3; 15; 33.6; 15.7; 8.6; 11.8	16878; 24921; 42568; 25092; 21941; 166460; 37625; 27693; 46723	0; 17196; 24892; 15119; 0; 34564; 31988; 0; 32648	3; 2; 4; 4; 2; 2; 3; 3; 3	2; 2; 4; 6; 3; 3; 4; 2; 6	2; 2; 4; 6; 3; 3; 4; 2; 6	2; 2; 4; 6; 3; 3; 4; 2; 6	3	By MS/MS; By MS/MS; By MS/MS; By MS/MS; By MS/MS; By MS/MS; By MS/MS; By MS/MS; By MS/MS	10; 9.5; 14.4; 27.8; 15.3; 9.7; 16; 6.9; 25.5	9957; 22344; 37690; 37140; 17693; 6494.1; 11571; 43525; 67970	0; 22876; 31044; 16639; 0; 0; 0; 33478; 25238	3; 3; 4; 4; 3; 2; 4; 1; 4
alr3276	0.73215	1	false	truth	1.09444	0.730138	0.526234	0.190263	0.712757	1.99044	1; 2; 2; 0; 1; 3; 3; 1; 2	1; 2; 2; 0; 1; 3; 3; 1; 2	1; 2; 2; 0; 1; 3; 3; 1; 2	2	By MS/MS; By MS/MS; By MS/MS; By matching; By MS/MS; By MS/MS; By MS/MS; By MS/MS; By MS/MS	3.8; 9.3; 9.3; 0; 3.8; 13.8; 16.7; 3.8; 9.3	32411; 56204; 47114; 0; 42198; 46390; 7050.5; 0; 86412	0; 42515; 44869; 0; 0; 26836; 0; 0; 37878	1; 1; 3; 0; 1; 1; 2; 1; 1	2; 1; 1; 3; 3; 3; 3; 3; 2	2; 1; 1; 3; 3; 3; 3; 3; 2	2; 1; 1; 3; 3; 3; 3; 3; 2	3	By MS/MS; By MS/MS; By MS/MS; By MS/MS; By MS/MS; By MS/MS; By MS/MS; By MS/MS; By MS/MS	11.2; 3.8; 5.4; 16.7; 16.7; 16.7; 16.7; 16.7; 9.3	46481; 28483; 3149.3; 73685; 73706; 83079; 77890; 67437; 83802	39211; 0; 0; 30950; 27964; 28219; 20674; 27897; 75627	3; 1; 1; 4; 3; 3; 4; 1; 2
alr3277	0.433682	1	false	truth	1.22505	0.886924	0.531929	0.0859982	0.772114	1.90852	6; 4; 3; 5; 5; 5; 3; 4; 6	6; 4; 3; 5; 5; 5; 3; 4; 6	6; 4; 3; 5; 5; 5; 3; 4; 6	5	By MS/MS; By MS/MS; By MS/MS; By MS/MS; By MS/MS; By MS/MS; By MS/MS; By MS/MS; By MS/MS	61.5; 42.5; 35.2; 57; 57; 57; 35.2; 43.6; 65.9	25788; 18496; 10109; 32586; 31411; 27064; 85584; 37737; 80569	15761; 30831; 13499; 18794; 25874; 11113; 67984; 38541; 42846	2; 1; 2; 8; 3; 1; 7; 6; 8	3; 5; 5; 3; 5; 5; 4; 3; 4	3; 5; 5; 3; 5; 5; 4; 3; 4	3; 5; 5; 3; 5; 5; 4; 3; 4	4	By MS/MS; By MS/MS; By MS/MS; By MS/MS; By MS/MS; By MS/MS; By MS/MS; By MS/MS; By MS/MS	29.1; 51.4; 57; 33.5; 53.6; 57; 42.5; 29.1; 43.6	12559; 21828; 4110.8; 2120.2; 78378; 53388; 15174; 51589; 14245	10858; 10692; 27236; 0; 41803; 28375; 17023; 27502; 22795	0; 4; 1; 0; 3; 6; 1; 0; 3
alr3283	0.724188	1	false	truth	1.14287	0.924759	0.79368	0.301094	0.565779	2.70468	3; 1; 2; 1; 3; 1; 2; 2; 4	3; 1; 2; 1; 3; 1; 2; 2; 4	3; 1; 2; 1; 3; 1; 2; 2; 4	2	By MS/MS; By matching; By MS/MS; By matching; By MS/MS; By matching; By MS/MS; By MS/MS; By MS/MS	4; 1.1; 4; 1.1; 4.2; 1.1; 5.3; 2.9; 7.2	13286; 2393.3; 10720; 2138.6; 24580; 3088.8; 11585; 3681.1; 12279	10846; 0; 0; 0; 14352; 0; 0; 0; 24038	3; 0; 1; 0; 1; 0; 1; 1; 4	3; 3; 2; 7; 1; 3; 4; 4; 5	3; 3; 2; 7; 1; 3; 4; 4; 5	3; 3; 2; 7; 1; 3; 4; 4; 5	3	By MS/MS; By MS/MS; By MS/MS; By MS/MS; By MS/MS; By MS/MS; By MS/MS; By matching; By MS/MS	5.5; 5.8; 3.9; 12.3; 2.4; 5.3; 7.1; 7; 9.1	14248; 12742; 3148.6; 34160; 0; 14076; 8251.8; 20324; 11672	30893; 10913; 0; 12574; 0; 0; 11532; 8366.9; 12754	2; 1; 1; 4; 1; 2; 3; 0; 3
alr3293	0.0599014	1	false	truth	0.638392	0.314335	0.226071	0.0737029	0.448865	0.929509	6; 3; 7; 3; 8; 7; 3; 1; 4	6; 3; 7; 3; 8; 7; 3; 1; 4	6; 3; 7; 3; 8; 7; 3; 1; 4	4	By MS/MS; By MS/MS; By MS/MS; By MS/MS; By MS/MS; By MS/MS; By MS/MS; By MS/MS; By MS/MS	23.5; 12.2; 23.3; 11.8; 29.3; 28.8; 11.5; 4.1; 16.4	33276; 12713; 37332; 8390.6; 29251; 37064; 3341.9; 0; 4492.3	18454; 0; 19546; 0; 15072; 10633; 0; 0; 0	4; 1; 4; 1; 4; 2; 1; 1; 1	2; 6; 4; 6; 5; 7; 5; 8; 6	2; 6; 4; 6; 5; 7; 5; 8; 6	2; 6; 4; 6; 5; 7; 5; 8; 6	6	By MS/MS; By MS/MS; By MS/MS; By MS/MS; By MS/MS; By MS/MS; By MS/MS; By MS/MS; By MS/MS	6.9; 24.7; 15.9; 22.4; 21.4; 27.9; 21.7; 28.8; 21	1185.3; 35960; 15969; 97118; 69270; 39583; 29426; 54377; 20127	0; 23011; 22010; 30585; 38769; 31717; 51993; 19178; 10159	0; 1; 0; 4; 2; 3; 4; 2; 1
alr3297	0.658115	1	false	truth	0.893796	0.560374	0.393746	0.103345	0.568422	1.4252	4; 4; 2; 4; 1; 0; 1; 2; 3	4; 4; 2; 4; 1; 0; 1; 2; 3	4; 4; 2; 4; 1; 0; 1; 2; 3	2	By MS/MS; By matching; By MS/MS; By MS/MS; By matching; By matching; By matching; By MS/MS; By MS/MS	28.2; 21.1; 10.5; 25.8; 6.2; 0; 6.2; 10.5; 23.9	20838; 26248; 17005; 28954; 15832; 0; 1721.2; 5526; 28607	12678; 6603; 12644; 15048; 9530.5; 0; 0; 0; 23090	5; 0; 1; 1; 0; 0; 0; 1; 4	1; 3; 1; 2; 3; 2; 2; 3; 2	1; 3; 1; 2; 3; 2; 2; 3; 2	1; 3; 1; 2; 3; 2; 2; 3; 2	2	By MS/MS; By matching; By matching; By MS/MS; By MS/MS; By MS/MS; By MS/MS; By MS/MS; By MS/MS	6.2; 14.4; 3.8; 10.5; 19.1; 10.5; 10.5; 21.5; 10.5	8473.7; 11856; 1602.6; 24544; 33055; 28256; 40028; 34622; 25991	0; 6065.5; 0; 5851.9; 20283; 16933; 20094; 22768; 17482	1; 0; 0; 1; 1; 3; 3; 1; 2
alr3300	0.0533746	1	false	truth	1.94044	1.22087	0.955781	0.125495	1.15958	3.27821	5; 6; 4; 4; 2; 2; 1; 4; 4	5; 6; 4; 4; 2; 2; 1; 4; 4	5; 6; 4; 4; 2; 2; 1; 4; 4	4	By MS/MS; By MS/MS; By MS/MS; By MS/MS; By MS/MS; By MS/MS; By MS/MS; By MS/MS; By MS/MS	18.2; 17.9; 14.5; 12.8; 8.1; 9.2; 4.7; 17.9; 15.6	50401; 34449; 11465; 36078; 21439; 5328.9; 0; 4499.8; 20197	32656; 27274; 4719; 22047; 15501; 0; 0; 0; 18367	2; 2; 4; 3; 2; 1; 1; 3; 5	0; 2; 4; 4; 3; 4; 3; 3; 2	0; 2; 4; 4; 3; 4; 3; 3; 2	0; 2; 4; 4; 3; 4; 3; 3; 2	3	By matching; By matching; By MS/MS; By MS/MS; By matching; By MS/MS; By MS/MS; By MS/MS; By MS/MS	0; 9.5; 14.2; 16.8; 10.9; 17.9; 12; 12; 8.4	0; 743.3; 17939; 13665; 8527.7; 13667; 18401; 14244; 10380	0; 0; 14246; 9029.6; 5864.3; 0; 17998; 9069; 0	0; 0; 1; 3; 0; 2; 4; 0; 1
alr3344	0.00392778	1	false	truth	1.462	0.436719	0.254154	0.0113512	1.22263	1.73495	14; 9; 15; 14; 9; 10; 15; 11; 12	14; 9; 15; 14; 9; 10; 15; 11; 12	14; 9; 15; 14; 9; 10; 15; 11; 12	12	By MS/MS; By MS/MS; By MS/MS; By MS/MS; By MS/MS; By MS/MS; By MS/MS; By MS/MS; By MS/MS	28.5; 21.6; 34.8; 32.5; 18.2; 25.1; 36; 29.6; 27.3	356760; 340460; 425920; 348710; 320320; 525720; 249910; 317300; 389800	305550; 299810; 343070; 229870; 269350; 318480; 200850; 225110; 227320	24; 13; 22; 35; 22; 12; 20; 20; 28	13; 14; 16; 11; 10; 12; 9; 13; 10	13; 14; 16; 11; 10; 12; 9; 13; 10	13; 14; 16; 11; 10; 12; 9; 13; 10	12	By MS/MS; By MS/MS; By MS/MS; By MS/MS; By MS/MS; By MS/MS; By MS/MS; By MS/MS; By MS/MS	31.2; 29.4; 34.2; 25.4; 23.4; 27.3; 20.9; 30.1; 24	218020; 267800; 319820; 293940; 281880; 425630; 331010; 351500; 243480	207930; 184280; 206200; 178690; 144290; 215820; 194790; 193700; 194490	12; 16; 12; 16; 10; 18; 14; 8; 13
alr3355	0.035765	1	false	truth	1.66648	0.607993	0.59072	0.0737908	1.17126	2.42725	3; 5; 6; 2; 0; 3; 3; 1; 5	3; 5; 6; 2; 0; 3; 3; 1; 5	3; 5; 6; 2; 0; 3; 3; 1; 5	3	By MS/MS; By MS/MS; By MS/MS; By matching; By matching; By matching; By MS/MS; By MS/MS; By MS/MS	11.7; 21.1; 23.4; 9.4; 0; 11.7; 10.4; 3.8; 19.3	86026; 107960; 90254; 11129; 0; 25654; 23483; 18533; 24800	34866; 33180; 37948; 0; 0; 0; 27252; 0; 0	0; 1; 5; 0; 0; 0; 1; 2; 3	2; 3; 4; 2; 2; 3; 4; 3; 4	2; 3; 4; 2; 2; 3; 4; 3; 4	2; 3; 4; 2; 2; 3; 4; 3; 4	3	By MS/MS; By MS/MS; By MS/MS; By MS/MS; By MS/MS; By MS/MS; By MS/MS; By MS/MS; By MS/MS	8.9; 12.4; 14.7; 9.4; 8.6; 11.7; 16.8; 11.7; 18.3	11422; 45725; 49937; 41924; 6630.9; 26735; 25567; 35728; 36235	0; 21817; 0; 0; 0; 28008; 19048; 0; 12913	1; 0; 2; 1; 1; 2; 3; 1; 2
alr3395	0.427178	1	false	truth	0.864648	0.385331	0.27028	0.0542654	0.631941	1.19658	2; 4; 2; 2; 1; 0; 2; 2; 3	2; 4; 2; 2; 1; 0; 2; 2; 3	2; 4; 2; 2; 1; 0; 2; 2; 3	2	By MS/MS; By MS/MS; By MS/MS; By MS/MS; By matching; By matching; By MS/MS; By MS/MS; By MS/MS	5.3; 11.8; 5.3; 5.3; 4.9; 0; 5.3; 5.3; 9.7	1658.2; 15850; 10580; 14961; 4222.2; 0; 10303; 10871; 15812	0; 7645.9; 13030; 15608; 0; 0; 10743; 11138; 10726	1; 1; 1; 1; 0; 0; 3; 3; 2	3; 2; 4; 3; 3; 2; 3; 3; 3	3; 2; 4; 3; 3; 2; 3; 3; 3	3; 2; 4; 3; 3; 2; 3; 3; 3	3	By MS/MS; By MS/MS; By MS/MS; By matching; By MS/MS; By MS/MS; By MS/MS; By matching; By MS/MS	8.8; 4.9; 13; 10.7; 10.9; 5.3; 8.1; 8.1; 9.7	14046; 11777; 14280; 14489; 25134; 17366; 28803; 20786; 11121	0; 10774; 19337; 10635; 16536; 14262; 16349; 9661.3; 0	1; 1; 3; 0; 2; 4; 2; 0; 1
alr3402	0.804843	1	false	truth	0.908081	0.732547	0.639775	0.282249	0.429839	2.10051	2; 1; 3; 1; 1; 3; 1; 1; 1	2; 1; 3; 1; 1; 3; 1; 1; 1	2; 1; 3; 1; 1; 3; 1; 1; 1	1	By MS/MS; By MS/MS; By MS/MS; By MS/MS; By matching; By MS/MS; By MS/MS; By MS/MS; By MS/MS	21.4; 13.7; 22.2; 7.7; 7.7; 22.2; 7.7; 7.7; 7.7	49999; 10308; 123590; 43536; 45179; 101010; 0; 0; 16529	46155; 0; 89586; 0; 0; 52180; 0; 0; 0	3; 1; 6; 2; 0; 2; 1; 1; 1	1; 2; 3; 0; 0; 2; 2; 2; 3	1; 2; 3; 0; 0; 2; 2; 2; 3	1; 2; 3; 0; 0; 2; 2; 2; 3	2	By MS/MS; By MS/MS; By MS/MS; By matching; By matching; By MS/MS; By MS/MS; By MS/MS; By MS/MS	13.7; 21.4; 22.2; 0; 0; 21.4; 21.4; 21.4; 22.2	7598.6; 89703; 81425; 0; 0; 32733; 138820; 102860; 99682	0; 64796; 56416; 0; 0; 20208; 79462; 63850; 157630	1; 2; 2; 0; 0; 3; 7; 3; 5
alr3411	0.408918	1	false	truth	1.23442	0.774167	0.572833	0.169554	0.809215	2.1637	0; 2; 3; 3; 2; 2; 3; 3; 2	0; 2; 3; 3; 2; 2; 3; 3; 2	0; 2; 3; 3; 2; 2; 3; 3; 2	2	By matching; By MS/MS; By MS/MS; By MS/MS; By MS/MS; By MS/MS; By MS/MS; By MS/MS; By MS/MS	0; 15.8; 20.5; 20.5; 12.6; 12.6; 20.5; 20.5; 12.6	0; 28594; 41651; 76868; 57058; 61293; 29807; 3752.1; 33177	0; 27196; 25984; 43622; 32407; 24284; 0; 0; 20122	0; 1; 4; 5; 1; 2; 3; 3; 3	3; 3; 1; 3; 3; 3; 1; 1; 2	3; 3; 1; 3; 3; 3; 1; 1; 2	3; 3; 1; 3; 3; 3; 1; 1; 2	3	By MS/MS; By matching; By matching; By MS/MS; By MS/MS; By MS/MS; By MS/MS; By MS/MS; By MS/MS	20.5; 20.5; 7.9; 20.5; 20.5; 20.5; 7.9; 7.9; 12.6	37513; 20277; 3752.1; 45367; 82755; 63272; 40668; 37790; 27951	21548; 5617.9; 0; 14712; 35215; 32559; 43765; 0; 0	2; 0; 0; 2; 3; 6; 3; 1; 3
alr3415	0.0104692	1	false	truth	1.23682	0.120284	0.193747	0.00330368	1.04681	1.43503	1; 1; 3; 2; 1; 2; 1; 2; 3	1; 1; 3; 2; 1; 2; 1; 2; 3	1; 1; 3; 2; 1; 2; 1; 2; 3	2	By MS/MS; By matching; By MS/MS; By MS/MS; By MS/MS; By MS/MS; By MS/MS; By MS/MS; By MS/MS	2.6; 2.6; 11.6; 5.8; 2.6; 10; 3.2; 8.4; 11.6	0; 3163.5; 5104.5; 18157; 20379; 15860; 4578.3; 32575; 27431	0; 0; 0; 0; 0; 0; 0; 15475; 18752	1; 0; 2; 2; 0; 1; 1; 3; 1	0; 1; 1; 1; 3; 4; 1; 1; 2	0; 1; 1; 1; 3; 4; 1; 1; 2	0; 1; 1; 1; 3; 4; 1; 1; 2	1	By matching; By MS/MS; By matching; By matching; By MS/MS; By MS/MS; By MS/MS; By MS/MS; By MS/MS	0; 2.6; 2.6; 2.6; 11.6; 18.9; 2.6; 7.4; 8.4	0; 11297; 10434; 20494; 34770; 28178; 14002; 3114.9; 26562	0; 0; 0; 0; 13300; 14742; 0; 0; 13052	0; 1; 0; 0; 1; 1; 1; 0; 1
alr3421	0.0110552	1	false	truth	1.60367	0.797685	0.485722	0.0652686	1.20093	2.23037	3; 2; 3; 5; 2; 2; 2; 4; 5	3; 2; 3; 5; 2; 2; 2; 4; 5	3; 2; 3; 5; 2; 2; 2; 4; 5	3	By MS/MS; By MS/MS; By MS/MS; By MS/MS; By MS/MS; By MS/MS; By MS/MS; By MS/MS; By MS/MS	14.4; 10.7; 20.5; 29.8; 15.8; 10.7; 10.7; 26.5; 26.5	58590; 52357; 55170; 100850; 79673; 20801; 60516; 74249; 75567	56552; 60805; 49405; 44512; 45432; 41926; 22005; 45583; 30518	7; 4; 7; 10; 9; 2; 5; 4; 8	2; 3; 2; 3; 3; 4; 5; 3; 4	2; 3; 2; 3; 3; 4; 5; 3; 4	2; 3; 2; 3; 3; 4; 5; 3; 4	3	By MS/MS; By MS/MS; By MS/MS; By MS/MS; By MS/MS; By MS/MS; By MS/MS; By MS/MS; By MS/MS	10.7; 16.3; 10.7; 20.5; 21.4; 20; 26.5; 11.2; 16.7	17981; 23871; 16060; 143550; 113660; 80378; 109930; 8828.8; 67354	18619; 29307; 17860; 27893; 48555; 27898; 40891; 0; 19041	1; 2; 2; 5; 4; 4; 3; 2; 3
alr3454	0.974639	1	false	truth	1.00576	0.278235	#N/A	#N/A	#N/A	#N/A	1; 4; 4; 2; 3; 5; 2; 4; 2	1; 4; 4; 2; 3; 5; 2; 4; 2	1; 4; 4; 2; 3; 5; 2; 4; 2	3	By MS/MS; By MS/MS; By MS/MS; By MS/MS; By MS/MS; By MS/MS; By MS/MS; By MS/MS; By MS/MS	3.9; 12.9; 13.6; 7.3; 9.5; 21.1; 7.9; 17.2; 6.8	8422.9; 21784; 7009.8; 0; 9041; 17156; 27245; 30997; 3598.2	0; 17432; 17144; 0; 0; 9861.2; 0; 0; 0	1; 2; 3; 2; 1; 3; 3; 5; 2	1; 0; 0; 4; 1; 5; 4; 3; 1	1; 0; 0; 4; 1; 5; 4; 3; 1	1; 0; 0; 4; 1; 5; 4; 3; 1	1	By matching; By matching; By matching; By MS/MS; By matching; By MS/MS; By MS/MS; By matching; By matching	2.7; 0; 0; 17.2; 3.9; 15; 13.4; 8.2; 2.9	3144.7; 0; 0; 7395.2; 3742.8; 26505; 16059; 11231; 3754.9	0; 0; 0; 0; 0; 16808; 0; 0; 0	0; 0; 0; 3; 0; 2; 2; 0; 0
alr3456	0.332267	1	false	truth	1.20714	0.636287	0.416835	0.105615	0.886447	1.81292	4; 2; 4; 5; 3; 4; 7; 3; 6	4; 2; 4; 5; 3; 4; 7; 3; 6	4; 2; 4; 5; 3; 4; 7; 3; 6	4	By MS/MS; By MS/MS; By MS/MS; By MS/MS; By MS/MS; By MS/MS; By MS/MS; By MS/MS; By MS/MS	22.4; 12.3; 21.3; 31.7; 21.3; 20.5; 40.7; 18.3; 35.8	20578; 15712; 19487; 57735; 44229; 45942; 49016; 25024; 46917	20563; 23715; 13870; 25352; 29027; 19916; 21414; 23161; 23869	8; 3; 5; 10; 4; 2; 7; 5; 5	2; 4; 3; 7; 5; 6; 3; 4; 3	2; 4; 3; 7; 5; 6; 3; 4; 3	2; 4; 3; 7; 5; 6; 3; 4; 3	4	By MS/MS; By MS/MS; By MS/MS; By MS/MS; By MS/MS; By MS/MS; By MS/MS; By MS/MS; By MS/MS	14.6; 23.1; 16; 45.9; 28; 35.8; 17.2; 26.5; 22.4	4729.5; 16638; 5059.1; 69473; 54431; 53636; 14157; 30764; 19580	0; 12421; 0; 27641; 35777; 16771; 17893; 14116; 14289	1; 3; 3; 7; 4; 4; 3; 1; 1
alr3464	0.00130611	1	false	truth	0.54727	0.209601	0.12198	0.0285522	0.438554	0.688155	5; 4; 7; 4; 4; 4; 5; 4; 3	5; 4; 7; 4; 4; 4; 5; 4; 3	5; 4; 7; 4; 4; 4; 5; 4; 3	4	By MS/MS; By MS/MS; By MS/MS; By MS/MS; By MS/MS; By MS/MS; By MS/MS; By MS/MS; By MS/MS	12.6; 9.6; 16.8; 10.4; 12.2; 10.4; 17.7; 10; 7.6	11553; 7210.6; 70422; 15384; 30047; 43595; 11975; 21536; 24820	21093; 14250; 20008; 25030; 13017; 24571; 21622; 21822; 15407	4; 2; 7; 3; 3; 2; 6; 6; 2	3; 3; 5; 7; 7; 5; 8; 5; 6	3; 3; 5; 7; 7; 5; 8; 5; 6	3; 3; 5; 7; 7; 5; 8; 5; 6	5	By MS/MS; By MS/MS; By MS/MS; By MS/MS; By MS/MS; By MS/MS; By MS/MS; By MS/MS; By MS/MS	6.8; 8.3; 12.6; 22.9; 21.4; 14.6; 24.4; 11.6; 16.6	19642; 12353; 38002; 184210; 97856; 148290; 64449; 94378; 93457	22543; 26641; 28061; 65703; 53251; 44637; 31082; 38947; 34034	1; 7; 5; 15; 8; 11; 13; 2; 9
alr3510	0.170851	1	false	truth	1.25317	0.486205	#N/A	0.101868	#N/A	#N/A	1; 0; 1; 0; 0; 5; 1; 2; 2	1; 0; 1; 0; 0; 5; 1; 2; 2	1; 0; 1; 0; 0; 5; 1; 2; 2	1	By matching; By matching; By matching; By matching; By matching; By matching; By matching; By MS/MS; By MS/MS	5.4; 0; 5.4; 0; 0; 17.2; 2.4; 8; 5.6	1811.8; 0; 1272.8; 0; 0; 26410; 3882.8; 5328.4; 1682	0; 0; 0; 0; 0; 7148.2; 0; 0; 0	0; 0; 0; 0; 0; 0; 0; 2; 1	1; 1; 2; 3; 1; 3; 2; 2; 4	1; 1; 2; 3; 1; 3; 2; 2; 4	1; 1; 2; 3; 1; 3; 2; 2; 4	2	By matching; By MS/MS; By matching; By MS/MS; By MS/MS; By MS/MS; By MS/MS; By matching; By MS/MS	5.4; 5.4; 9.2; 13.4; 5.4; 10.4; 8; 8; 15.8	5017.5; 0; 3035.9; 7142; 0; 20739; 3780.3; 5315.2; 20598	0; 0; 4374.1; 6684.8; 0; 11503; 4602.2; 6920.1; 6605.4	0; 1; 0; 3; 1; 2; 1; 0; 2
alr3525	0.753619	1	false	truth	1.09831	0.696263	0.591298	0.174693	0.639639	2.02194	2; 2; 1; 1; 1; 2; 3; 1; 2	2; 2; 1; 1; 1; 2; 3; 1; 2	2; 2; 1; 1; 1; 2; 3; 1; 2	2	By MS/MS; By MS/MS; By MS/MS; By MS/MS; By MS/MS; By matching; By MS/MS; By MS/MS; By MS/MS	9.6; 9.6; 4.5; 4.5; 4.5; 7.8; 12.9; 3.3; 7.8	5024.7; 5045.6; 3437; 4815.7; 4387; 9647; 20490; 9637.2; 12032	3431.8; 3738.4; 4600.2; 0; 0; 6601.5; 6554.8; 0; 10577	5; 6; 1; 8; 3; 0; 3; 1; 3	1; 1; 0; 3; 1; 2; 1; 1; 3	1; 1; 0; 3; 1; 2; 1; 1; 3	1; 1; 0; 3; 1; 2; 1; 1; 3	1	By MS/MS; By MS/MS; By matching; By MS/MS; By MS/MS; By MS/MS; By MS/MS; By matching; By MS/MS	4.5; 4.5; 0; 12.9; 4.5; 9.6; 4.5; 4.5; 12.9	2031; 1726.6; 0; 19187; 8299.9; 8788.8; 5707.1; 5358.9; 13979	0; 0; 0; 9799.2; 0; 3344.3; 4302.1; 0; 7308.5	1; 3; 0; 6; 1; 2; 2; 0; 2
alr3529	0.929603	1	false	truth	1.04035	0.807036	0.888113	0.471572	0.4343	3.50322	0; 3; 1; 2; 0; 0; 3; 2; 2	0; 3; 1; 2; 0; 0; 3; 2; 2	0; 3; 1; 2; 0; 0; 3; 2; 2	2	By matching; By MS/MS; By MS/MS; By MS/MS; By matching; By matching; By MS/MS; By MS/MS; By MS/MS	0; 20.4; 7.9; 12.6; 0; 0; 20.4; 13.1; 13.1	0; 26559; 0; 16793; 0; 0; 10176; 9888.8; 9140.7	0; 16067; 0; 21065; 0; 0; 0; 8361.5; 7096.2	0; 1; 1; 1; 0; 0; 3; 2; 2	1; 1; 1; 2; 1; 1; 1; 2; 2	1; 1; 1; 2; 1; 1; 1; 2; 2	1; 1; 1; 2; 1; 1; 1; 2; 2	1	By MS/MS; By MS/MS; By MS/MS; By MS/MS; By MS/MS; By MS/MS; By matching; By matching; By MS/MS	7.9; 7.9; 7.9; 13.1; 7.9; 7.9; 7.9; 15.2; 13.1	0; 6809.5; 0; 12446; 0; 14566; 23228; 37232; 21513	0; 0; 0; 5687.1; 0; 0; 0; 17699; 15114	1; 1; 1; 1; 2; 1; 0; 0; 1
alr3602	0.638605	1	false	truth	1.19402	0.952301	0.818516	0.384001	0.657085	3.21961	3; 3; 3; 3; 4; 1; 4; 2; 3	3; 3; 3; 3; 4; 1; 4; 2; 3	3; 3; 3; 3; 4; 1; 4; 2; 3	3	By MS/MS; By MS/MS; By MS/MS; By MS/MS; By MS/MS; By matching; By MS/MS; By MS/MS; By MS/MS	9.4; 6.7; 6.6; 6.7; 10.1; 2.2; 10.1; 4; 6.3	15424; 12663; 9844.2; 10950; 14604; 16411; 25285; 0; 2250.8	25045; 13689; 10799; 13351; 19827; 0; 18665; 0; 5602.1	2; 2; 2; 2; 1; 0; 1; 2; 1	3; 2; 1; 4; 1; 2; 0; 3; 3	3; 2; 1; 4; 1; 2; 0; 3; 3	3; 2; 1; 4; 1; 2; 0; 3; 3	2	By matching; By MS/MS; By MS/MS; By MS/MS; By matching; By MS/MS; By matching; By matching; By matching	7.8; 5.1; 1.8; 11; 2.6; 4.8; 0; 7.8; 7.8	7704.8; 12545; 3682.5; 14738; 2230.6; 4350.5; 0; 15696; 15187	7945.4; 23644; 0; 0; 0; 0; 0; 10587; 5816.1	0; 1; 1; 1; 0; 2; 0; 0; 0
alr3606	0.114021	1	false	truth	1.42409	0.818962	0.489448	0.0467721	0.987811	2.00013	6; 2; 5; 7; 7; 3; 4; 6; 5	6; 2; 5; 7; 7; 3; 4; 6; 5	6; 2; 5; 7; 7; 3; 4; 6; 5	5	By MS/MS; By MS/MS; By MS/MS; By MS/MS; By MS/MS; By MS/MS; By MS/MS; By MS/MS; By MS/MS	17.7; 6.5; 21.2; 25.1; 25.1; 12.8; 15.8; 22.8; 18.1	42859; 21180; 19239; 72624; 93950; 50075; 28364; 43807; 21185	44607; 15727; 12423; 38290; 47219; 30705; 23386; 25494; 20544	5; 1; 4; 9; 5; 3; 3; 5; 3	3; 4; 6; 5; 2; 3; 6; 5; 7	3; 4; 6; 5; 2; 3; 6; 5; 7	3; 4; 6; 5; 2; 3; 6; 5; 7	5	By MS/MS; By MS/MS; By MS/MS; By MS/MS; By MS/MS; By MS/MS; By MS/MS; By MS/MS; By MS/MS	9.3; 14.9; 17.7; 18.1; 7.9; 9.8; 22.1; 16.7; 26	13831; 23621; 28640; 19198; 35875; 41474; 73051; 45934; 52081	0; 15115; 15269; 10830; 19422; 29634; 35305; 27131; 19339	3; 3; 1; 2; 1; 3; 6; 2; 5
alr3608	0.585532	1	false	truth	0.866776	0.665981	0.387575	0.0978475	0.542044	1.37953	7; 8; 6; 6; 7; 6; 9; 5; 7	7; 8; 6; 6; 7; 6; 9; 5; 7	7; 8; 6; 6; 7; 6; 9; 5; 7	7	By MS/MS; By MS/MS; By MS/MS; By MS/MS; By MS/MS; By MS/MS; By MS/MS; By MS/MS; By MS/MS	18.3; 20.1; 14.1; 14.9; 15.4; 18.3; 26.1; 14.9; 17.4	52287; 76827; 63865; 40144; 29873; 56008; 45870; 23035; 37178	58009; 67786; 65945; 39965; 18843; 27234; 19382; 15626; 30343	7; 4; 8; 7; 2; 4; 7; 2; 6	4; 7; 7; 9; 5; 5; 11; 7; 10	4; 7; 7; 9; 5; 5; 11; 7; 10	4; 7; 7; 9; 5; 5; 11; 7; 10	7	By MS/MS; By MS/MS; By MS/MS; By MS/MS; By MS/MS; By MS/MS; By MS/MS; By MS/MS; By MS/MS	10; 19; 17; 25; 12.5; 14.3; 29.7; 22.5; 28.1	55022; 69295; 58797; 45119; 58388; 130740; 159090; 67046; 185230	42196; 51895; 52967; 8105.9; 30125; 79092; 57492; 11048; 66433	2; 4; 4; 2; 3; 4; 13; 6; 8
alr3658	0.0173787	1	false	truth	0.446966	0.12795	#N/A	#N/A	#N/A	#N/A	0; 1; 2; 3; 0; 3; 1; 0; 2	0; 1; 2; 3; 0; 3; 1; 0; 2	0; 1; 2; 3; 0; 3; 1; 0; 2	1	By matching; By matching; By matching; By MS/MS; By matching; By MS/MS; By MS/MS; By matching; By MS/MS	0; 4.1; 7.3; 9.9; 0; 12.1; 3.2; 0; 7.3	0; 2858; 10238; 19803; 0; 10179; 4752.3; 0; 6415.9	0; 0; 0; 5502.3; 0; 2870.2; 0; 0; 5373.4	0; 0; 0; 2; 0; 1; 1; 0; 1	2; 0; 0; 2; 2; 2; 0; 1; 2	2; 0; 0; 2; 2; 2; 0; 1; 2	2; 0; 0; 2; 2; 2; 0; 1; 2	2	By matching; By matching; By matching; By MS/MS; By MS/MS; By MS/MS; By matching; By matching; By MS/MS	7.3; 0; 0; 5.8; 7.3; 7.3; 0; 4.1; 7.1	19980; 0; 0; 24621; 3172.6; 0; 0; 1651; 4090.5	0; 0; 0; 14940; 0; 0; 0; 0; 0	0; 0; 0; 2; 1; 2; 0; 0; 2
alr3661	0.678014	1	false	truth	0.911288	0.582235	0.338838	0.104402	0.644049	1.39099	3; 4; 3; 4; 4; 4; 3; 4; 3	3; 4; 3; 4; 4; 4; 3; 4; 3	3; 4; 3; 4; 4; 4; 3; 4; 3	4	By MS/MS; By MS/MS; By MS/MS; By MS/MS; By MS/MS; By MS/MS; By MS/MS; By MS/MS; By MS/MS	41.7; 53.4; 41.7; 53.4; 53.4; 53.4; 41.7; 41.7; 41.7	212970; 198930; 206310; 383510; 320600; 355110; 479990; 511320; 434470	209020; 146020; 111120; 253390; 268870; 135510; 278690; 295310; 261430	9; 6; 10; 28; 11; 6; 12; 17; 15	3; 3; 3; 3; 3; 3; 4; 2; 3	3; 3; 3; 3; 3; 3; 4; 2; 3	3; 3; 3; 3; 3; 3; 4; 2; 3	3	By MS/MS; By MS/MS; By MS/MS; By MS/MS; By MS/MS; By MS/MS; By MS/MS; By MS/MS; By MS/MS	41.7; 41.7; 41.7; 41.7; 41.7; 41.7; 53.4; 27.2; 41.7	186750; 164010; 279850; 631460; 710470; 531380; 315060; 150630; 357450	156610; 104500; 156670; 435100; 517620; 203050; 245130; 190280; 249460	10; 11; 6; 12; 8; 11; 15; 2; 11
alr3662	0.287166	1	false	truth	0.878339	0.291234	0.169487	0.0311219	0.732069	1.08104	25; 22; 24; 21; 21; 20; 21; 20; 19	25; 22; 24; 21; 21; 20; 21; 20; 19	24; 21; 22; 20; 21; 20; 20; 19; 18	20	By MS/MS; By MS/MS; By MS/MS; By MS/MS; By MS/MS; By MS/MS; By MS/MS; By MS/MS; By MS/MS	54.4; 50.7; 52; 48.9; 48.9; 50.6; 52.6; 55.5; 45.2	653330; 593970; 626400; 810370; 488160; 596350; 610840; 645880; 835850	462080; 430430; 482310; 459790; 433790; 399190; 411390; 425840; 568770	50; 28; 45; 74; 23; 16; 52; 42; 49	19; 21; 20; 22; 20; 25; 21; 18; 22	19; 21; 20; 22; 20; 25; 21; 18; 22	18; 20; 20; 20; 20; 24; 20; 16; 21	20	By MS/MS; By MS/MS; By MS/MS; By MS/MS; By MS/MS; By MS/MS; By MS/MS; By MS/MS; By MS/MS	42.8; 48.3; 45.4; 48.3; 55.7; 57.4; 55.9; 43.4; 55.7	457070; 491020; 400490; 1188200; 1142000; 1936300; 1017100; 968830; 974040	265560; 381820; 328540; 638270; 667640; 814130; 635700; 590010; 585500	31; 43; 25; 56; 21; 68; 52; 15; 36
alr3667	0.958251	1	false	false	0.987042	0.379812	#N/A	#N/A	#N/A	#N/A	0; 0; 2; 1; 0; 1; 3; 2; 3	0; 0; 2; 1; 0; 1; 3; 2; 3	0; 0; 2; 1; 0; 1; 3; 2; 3	1	By matching; By matching; By matching; By MS/MS; By matching; By matching; By MS/MS; By MS/MS; By MS/MS	0; 0; 37; 25; 0; 18; 62; 37; 62	0; 0; 1944.9; 0; 0; 1805.7; 3930.2; 2144; 4283.4	0; 0; 2335.2; 0; 0; 0; 2312.4; 0; 4316.1	0; 0; 0; 1; 0; 0; 8; 5; 4	1; 1; 0; 1; 0; 1; 2; 1; 0	1; 1; 0; 1; 0; 1; 2; 1; 0	1; 1; 0; 1; 0; 1; 2; 1; 0	1	By matching; By matching; By matching; By matching; By matching; By MS/MS; By MS/MS; By matching; By matching	18; 18; 0; 19; 0; 19; 37; 18; 0	1076.3; 1860.6; 0; 1737; 0; 2108.1; 4846.2; 1793; 0	0; 0; 0; 0; 0; 0; 3563.9; 0; 0	0; 0; 0; 0; 0; 2; 2; 0; 0
alr3670	0.00594968	1	false	truth	1.60318	0.279607	0.302148	0.0336012	1.34656	1.9713	1; 1; 2; 1; 2; 3; 2; 5; 3	1; 1; 2; 1; 2; 3; 2; 5; 3	1; 1; 2; 1; 2; 3; 2; 5; 3	2	By matching; By matching; By MS/MS; By MS/MS; By matching; By matching; By MS/MS; By MS/MS; By MS/MS	3; 2.3; 6.9; 2.3; 5.5; 10.9; 6.2; 17.1; 8.5	7023.7; 3216.7; 5375.9; 0; 14296; 15551; 15887; 25088; 27710	0; 0; 0; 0; 0; 0; 0; 15180; 15595	0; 0; 1; 1; 0; 0; 1; 4; 3	2; 2; 1; 4; 0; 2; 4; 3; 3	2; 2; 1; 4; 0; 2; 4; 3; 3	2; 2; 1; 4; 0; 2; 4; 3; 3	2	By matching; By matching; By matching; By MS/MS; By matching; By matching; By matching; By matching; By MS/MS	5.3; 5.3; 3; 12.3; 0; 5.3; 11.1; 8.5; 10.9	10325; 18717; 11401; 29985; 0; 12089; 20179; 12937; 17730	0; 0; 0; 16303; 0; 12080; 10349; 8292.9; 0	0; 0; 0; 2; 0; 0; 0; 0; 1
alr3681	0.0944468	1	false	truth	1.18517	0.349698	0.203511	0.0218025	1.00413	1.41904	12; 8; 12; 11; 9; 14; 9; 10; 9	12; 8; 12; 11; 9; 14; 9; 10; 9	12; 8; 12; 11; 9; 14; 9; 10; 9	10	By MS/MS; By MS/MS; By MS/MS; By MS/MS; By MS/MS; By MS/MS; By MS/MS; By MS/MS; By MS/MS	33.5; 22.5; 37.4; 34.4; 29.1; 38.9; 28.2; 26.8; 27.6	95571; 126300; 144560; 113580; 118870; 218640; 124360; 121210; 125980	59031; 74099; 80838; 77245; 90187; 70954; 84159; 68695; 86534	16; 12; 14; 18; 10; 8; 16; 10; 19	8; 4; 9; 9; 11; 11; 9; 8; 13	8; 4; 9; 9; 11; 11; 9; 8; 13	8; 4; 9; 9; 11; 11; 9; 8; 13	9	By MS/MS; By MS/MS; By MS/MS; By MS/MS; By MS/MS; By MS/MS; By MS/MS; By MS/MS; By MS/MS	23.4; 11.7; 24; 27.8; 36.5; 31.8; 26.5; 24.2; 39.1	87108; 21219; 80296; 158300; 163990; 221870; 183640; 90566; 202830	50624; 44094; 53929; 115370; 82592; 76272; 79192; 42597; 76516	10; 6; 9; 10; 11; 16; 12; 2; 12
alr3683	0.0167319	1	false	truth	0.540858	0.338355	0.2107	0.0582688	0.354639	0.794007	4; 4; 4; 2; 2; 4; 3; 6; 4	4; 4; 4; 2; 2; 4; 3; 6; 4	4; 4; 4; 2; 2; 4; 3; 6; 4	4	By MS/MS; By MS/MS; By MS/MS; By MS/MS; By MS/MS; By MS/MS; By MS/MS; By MS/MS; By MS/MS	27.6; 25.9; 25.4; 13.4; 12.1; 28.9; 20.3; 34.9; 27.6	23059; 91540; 78337; 36689; 52192; 64646; 27475; 36371; 69125	24132; 60792; 50843; 0; 49077; 23710; 21812; 14983; 30766	4; 1; 7; 2; 2; 0; 3; 3; 4	4; 2; 2; 3; 3; 4; 4; 5; 5	4; 2; 2; 3; 3; 4; 4; 5; 5	4; 2; 2; 3; 3; 4; 4; 5; 5	4	By MS/MS; By MS/MS; By MS/MS; By MS/MS; By MS/MS; By MS/MS; By MS/MS; By MS/MS; By MS/MS	22.4; 12.1; 10.8; 22.8; 22.8; 27.6; 27.6; 25.4; 34.9	73987; 60809; 59218; 50852; 7379.4; 160780; 165630; 203750; 135010	49038; 41326; 38474; 45247; 0; 98432; 90660; 84452; 92001	3; 4; 2; 1; 1; 4; 3; 3; 5
alr3692	0.393451	1	false	truth	1.22915	0.714485	0.520784	0.115457	0.813084	1.96609	2; 2; 2; 2; 2; 3; 2; 2; 3	2; 2; 2; 2; 2; 3; 2; 2; 3	1; 1; 2; 2; 2; 2; 2; 2; 3	2	By matching; By MS/MS; By MS/MS; By MS/MS; By MS/MS; By MS/MS; By MS/MS; By MS/MS; By MS/MS	12.3; 12.3; 12.7; 12.7; 18; 17.6; 12.7; 12.7; 23.2	16793; 17240; 69106; 25051; 12580; 67246; 35352; 25239; 35464	13950; 15361; 33575; 30623; 0; 32645; 27943; 13179; 27152	0; 0; 6; 1; 2; 4; 4; 2; 4	2; 0; 3; 1; 2; 1; 2; 2; 0	2; 0; 3; 1; 2; 1; 2; 2; 0	2; 0; 2; 1; 2; 1; 2; 2; 0	2	By MS/MS; By matching; By MS/MS; By MS/MS; By matching; By MS/MS; By MS/MS; By matching; By matching	12.7; 0; 17.6; 7.4; 12.7; 5.3; 13; 12.7; 0	33575; 0; 34430; 11973; 30367; 0; 21863; 16165; 0	18662; 0; 30793; 0; 10647; 0; 26904; 13055; 0	1; 0; 5; 1; 0; 1; 1; 0; 0
alr3749	0.184625	1	false	truth	1.28843	0.433073	#N/A	0.156429	#N/A	#N/A	2; 2; 2; 1; 1; 2; 1; 1; 1	2; 2; 2; 1; 1; 2; 1; 1; 1	2; 2; 2; 1; 1; 2; 1; 1; 1	1	By MS/MS; By MS/MS; By matching; By matching; By matching; By matching; By matching; By MS/MS; By matching	6.9; 7.1; 5.6; 3.2; 3; 5.4; 3.2; 3.2; 3.2	4301.9; 5150; 12864; 4931.2; 5235.2; 8376.4; 8006; 3075.9; 4088.9	0; 0; 16625; 0; 0; 0; 0; 0; 0	2; 1; 0; 0; 0; 0; 0; 1; 0	2; 3; 0; 7; 4; 4; 1; 2; 2	2; 3; 0; 7; 4; 4; 1; 2; 2	2; 3; 0; 7; 4; 4; 1; 2; 2	2	By matching; By MS/MS; By matching; By MS/MS; By MS/MS; By MS/MS; By matching; By matching; By matching	5.4; 10.1; 0; 30.5; 12.4; 15.7; 3; 6.9; 6	3478.7; 933.5; 0; 31257; 25780; 124680; 1415.7; 17224; 17847	0; 0; 0; 12661; 13151; 22837; 0; 14444; 0	0; 2; 0; 5; 1; 2; 0; 0; 0
alr3751	0.00746823	1	false	truth	1.88394	0.955566	0.731098	0.125011	1.32647	2.97974	2; 3; 4; 3; 2; 3; 4; 4; 4	2; 3; 4; 3; 2; 3; 4; 4; 4	2; 3; 4; 3; 2; 3; 4; 4; 4	3	By MS/MS; By MS/MS; By MS/MS; By MS/MS; By MS/MS; By MS/MS; By MS/MS; By MS/MS; By MS/MS	7.2; 10.6; 13.4; 10.3; 7.5; 10.6; 10.1; 13.4; 13.4	32175; 29167; 28807; 36011; 22034; 27015; 38236; 48277; 34568	27956; 26398; 27034; 26384; 0; 13859; 16168; 24983; 22046	5; 4; 5; 5; 2; 0; 3; 4; 6	2; 2; 2; 2; 3; 3; 2; 3; 2	2; 2; 2; 2; 3; 3; 2; 3; 2	2; 2; 2; 2; 3; 3; 2; 3; 2	2	By MS/MS; By MS/MS; By MS/MS; By MS/MS; By matching; By MS/MS; By MS/MS; By matching; By MS/MS	7.2; 7.5; 7.5; 7.5; 10.1; 10.6; 7.5; 9.3; 7.2	9998.7; 11523; 10822; 37197; 43549; 19318; 17734; 18139; 14553	0; 0; 5407.3; 24899; 15971; 0; 0; 14228; 7073.9	2; 3; 2; 4; 0; 5; 3; 0; 2
alr3768	0.537089	1	false	truth	0.788443	0.680083	0.545435	0.0970653	0.292972	1.45343	3; 2; 0; 2; 1; 0; 3; 1; 3	3; 2; 0; 2; 1; 0; 3; 1; 3	2; 2; 0; 1; 0; 0; 2; 0; 2	1	By MS/MS; By MS/MS; By matching; By MS/MS; By matching; By matching; By MS/MS; By MS/MS; By MS/MS	15.4; 19.2; 0; 12.1; 3.8; 0; 18.3; 3.8; 14.2	12331; 0; 0; 11548; 13480; 0; 31181; 17677; 19613	16420; 0; 0; 7107.9; 0; 0; 6781.1; 0; 27447	2; 1; 0; 1; 0; 0; 2; 1; 3	2; 4; 3; 6; 5; 4; 4; 2; 5	2; 4; 3; 6; 5; 4; 4; 2; 5	1; 3; 2; 5; 4; 3; 3; 1; 4	3	By MS/MS; By MS/MS; By matching; By MS/MS; By MS/MS; By MS/MS; By MS/MS; By matching; By MS/MS	7.9; 19.6; 20; 38.8; 34.6; 29.2; 26.2; 10; 30.4	14073; 14350; 7104.3; 50749; 55718; 67299; 26200; 29179; 57913	4644.2; 11668; 14329; 26592; 34626; 14786; 16486; 19233; 24144	1; 2; 0; 3; 2; 4; 4; 0; 1
alr3798	0.00145886	1	false	truth	0.524008	0.207858	0.120965	0.0326134	0.417424	0.665924	4; 4; 3; 6; 4; 5; 2; 2; 6	4; 4; 3; 6; 4; 5; 2; 2; 6	4; 4; 3; 6; 4; 5; 2; 2; 6	4	By MS/MS; By MS/MS; By MS/MS; By MS/MS; By MS/MS; By MS/MS; By MS/MS; By MS/MS; By MS/MS	22.8; 28.5; 16; 28.9; 20.2; 33.1; 12.2; 12.5; 39.9	29639; 44971; 45914; 92448; 54766; 90445; 25221; 24407; 59583	30999; 41701; 27089; 49606; 35873; 40599; 33378; 20233; 41822	6; 4; 5; 8; 2; 2; 2; 3; 5	4; 6; 5; 7; 5; 8; 6; 4; 7	4; 6; 5; 7; 5; 8; 6; 4; 7	4; 6; 5; 7; 5; 8; 6; 4; 7	6	By MS/MS; By MS/MS; By MS/MS; By MS/MS; By MS/MS; By MS/MS; By MS/MS; By MS/MS; By MS/MS	22.8; 32.3; 27.4; 37.3; 25.1; 44.5; 37.3; 22.8; 37.6	79517; 90647; 50105; 177430; 94007; 299330; 181660; 149550; 238350	49652; 43466; 35542; 103920; 58027; 114090; 80573; 79272; 88108	4; 7; 4; 8; 3; 14; 9; 1; 10
alr3809	0.0496469	1	false	truth	0.77792	0.216242	0.167064	0.00476618	0.61414	0.949151	3; 3; 4; 5; 1; 6; 4; 4; 4	3; 3; 4; 5; 1; 6; 4; 4; 4	3; 3; 4; 5; 1; 6; 4; 4; 4	4	By MS/MS; By MS/MS; By MS/MS; By MS/MS; By MS/MS; By MS/MS; By MS/MS; By MS/MS; By MS/MS	5.4; 4; 6.8; 7.2; 2.4; 10.2; 5.3; 6.2; 5.5	11566; 18238; 10329; 12566; 2157.9; 28673; 58920; 8978.3; 13579	14453; 15830; 0; 0; 0; 12807; 26320; 10653; 14615	2; 2; 3; 4; 1; 1; 3; 3; 1	1; 2; 0; 3; 2; 5; 3; 6; 3	1; 2; 0; 3; 2; 5; 3; 6; 3	1; 2; 0; 3; 2; 5; 3; 6; 3	3	By matching; By MS/MS; By matching; By MS/MS; By MS/MS; By MS/MS; By MS/MS; By matching; By MS/MS	1.6; 4.1; 0; 5.1; 4; 6.3; 4.3; 8.5; 4.3	2641.9; 6892; 0; 20947; 9723.1; 38961; 6354.8; 66034; 12321	0; 0; 0; 29001; 0; 21146; 0; 18644; 19504	0; 1; 0; 3; 0; 3; 4; 0; 1
alr3813	0.303773	1	false	truth	1.18974	0.507329	0.33053	0.0299915	0.888913	1.56414	1; 1; 1; 2; 2; 2; 1; 2; 2	1; 1; 1; 2; 2; 2; 1; 2; 2	1; 1; 1; 2; 2; 2; 1; 2; 2	2	By MS/MS; By MS/MS; By MS/MS; By MS/MS; By MS/MS; By MS/MS; By MS/MS; By MS/MS; By MS/MS	10.5; 10.5; 10.5; 26.3; 26.3; 26.3; 10.5; 26.3; 26.3	30358; 36332; 7104.6; 15376; 10805; 14986; 25505; 43005; 21319	23699; 27613; 0; 9918.3; 0; 10157; 21059; 20498; 17310	3; 5; 4; 6; 4; 3; 8; 5; 9	1; 2; 1; 1; 1; 2; 1; 3; 2	1; 2; 1; 1; 1; 2; 1; 3; 2	1; 2; 1; 1; 1; 2; 1; 3; 2	1	By MS/MS; By MS/MS; By MS/MS; By MS/MS; By MS/MS; By MS/MS; By MS/MS; By MS/MS; By MS/MS	10.5; 18.4; 10.5; 10.5; 10.5; 26.3; 10.5; 34.2; 26.3	8151.4; 29509; 12375; 35373; 28663; 29170; 20334; 32283; 8924.1	7417.3; 20647; 11913; 21252; 17949; 18016; 16194; 15270; 0	4; 5; 2; 4; 4; 5; 7; 1; 1
alr3814	0.780468	1	false	false	1.15369	0.96636	1.18942	0.624942	0.343384	5.80869	1; 2; 0; 2; 1; 1; 2; 2; 1	1; 2; 0; 2; 1; 1; 2; 2; 1	1; 2; 0; 2; 1; 1; 2; 2; 1	1	By MS/MS; By MS/MS; By matching; By MS/MS; By MS/MS; By MS/MS; By MS/MS; By MS/MS; By MS/MS	11.4; 21.4; 0; 21.4; 11.4; 10; 21.4; 21.4; 10	2821.7; 5690.5; 0; 4831; 4574.4; 5392.2; 16547; 26944; 9728.5	0; 6676.8; 0; 0; 0; 0; 24870; 18718; 0	1; 1; 0; 2; 0; 1; 3; 5; 3	1; 1; 1; 2; 2; 2; 1; 1; 1	1; 1; 1; 2; 2; 2; 1; 1; 1	1; 1; 1; 2; 2; 2; 1; 1; 1	1	By matching; By matching; By matching; By MS/MS; By MS/MS; By MS/MS; By MS/MS; By matching; By MS/MS	10; 10; 10; 21.4; 21.4; 21.4; 10; 11.4; 10	3655.5; 1760.4; 4010.6; 5560.7; 16393; 3248.9; 24479; 1724.9; 3681.8	0; 0; 0; 10185; 21903; 0; 12365; 0; 0	0; 0; 0; 4; 2; 3; 3; 0; 2
alr3829	0.00220661	1	false	truth	0.536128	0.255083	0.162476	0.0296827	0.386772	0.718284	3; 4; 3; 4; 2; 3; 4; 4; 4	3; 4; 3; 4; 2; 3; 4; 4; 4	3; 4; 3; 4; 2; 3; 4; 4; 4	4	By MS/MS; By matching; By MS/MS; By MS/MS; By MS/MS; By MS/MS; By MS/MS; By MS/MS; By MS/MS	8; 12.2; 8; 14.1; 6.6; 13.6; 13.4; 13.4; 16	27522; 40155; 25799; 18028; 1594.8; 6463.9; 10583; 40082; 0	15122; 11378; 18049; 14465; 0; 5551.7; 10009; 11158; 0	1; 0; 3; 4; 1; 1; 2; 2; 4	4; 4; 3; 5; 4; 4; 2; 2; 4	4; 4; 3; 5; 4; 4; 2; 2; 4	4; 4; 3; 5; 4; 4; 2; 2; 4	4	By MS/MS; By MS/MS; By MS/MS; By MS/MS; By MS/MS; By MS/MS; By MS/MS; By matching; By MS/MS	15.1; 15.1; 10.8; 18.1; 15.1; 16.2; 5.9; 8.7; 12.7	38926; 45166; 21555; 70190; 55059; 52014; 36857; 16658; 50251	22774; 18763; 23226; 21158; 21347; 32144; 37259; 11404; 26236	2; 1; 2; 3; 2; 5; 3; 0; 3
alr3832	0.331409	1	false	truth	0.863198	0.351865	0.213664	0.0407754	0.678669	1.12111	11; 11; 13; 11; 9; 11; 12; 12; 13	11; 11; 13; 11; 9; 11; 12; 12; 13	11; 11; 13; 11; 9; 11; 12; 12; 13	11	By MS/MS; By MS/MS; By MS/MS; By MS/MS; By MS/MS; By MS/MS; By MS/MS; By MS/MS; By MS/MS	15.8; 15; 16.6; 13.9; 15.5; 15.8; 21.7; 16.7; 23.3	64204; 70292; 60497; 61858; 49269; 92167; 48355; 68383; 70792	68993; 49156; 39998; 46967; 33121; 33245; 46214; 33070; 36881	11; 11; 10; 12; 7; 3; 7; 6; 9	9; 8; 5; 10; 10; 13; 11; 10; 11	9; 8; 5; 10; 10; 13; 11; 10; 11	9; 8; 5; 10; 10; 13; 11; 10; 11	10	By MS/MS; By MS/MS; By MS/MS; By MS/MS; By MS/MS; By MS/MS; By MS/MS; By MS/MS; By MS/MS	12.9; 10.7; 8.2; 16.7; 17.4; 21.6; 17.4; 13.5; 15.2	62178; 36895; 6324.2; 46670; 54655; 115450; 38897; 249160; 88373	35540; 30345; 0; 36617; 56341; 82342; 71943; 52037; 51918	3; 3; 4; 9; 7; 13; 7; 3; 8
alr3844	0.198385	1	false	truth	1.52642	0.960094	0.710407	0.0489561	0.872302	2.33768	2; 4; 4; 4; 5; 3; 5; 3; 3	2; 4; 4; 4; 5; 3; 5; 3; 3	2; 4; 4; 4; 5; 3; 5; 3; 3	4	By MS/MS; By matching; By MS/MS; By MS/MS; By MS/MS; By matching; By MS/MS; By MS/MS; By MS/MS	8.3; 16.8; 17.1; 22.1; 26; 17.4; 24.5; 15.6; 12.4	15270; 13367; 21724; 25825; 22480; 7242.6; 46585; 28049; 44569	0; 7244.4; 10007; 15988; 7577; 0; 23111; 0; 29565	0; 0; 2; 0; 1; 0; 4; 3; 5	4; 1; 1; 1; 3; 5; 4; 2; 3	4; 1; 1; 1; 3; 5; 4; 2; 3	4; 1; 1; 1; 3; 5; 4; 2; 3	3	By MS/MS; By matching; By matching; By MS/MS; By matching; By MS/MS; By MS/MS; By MS/MS; By MS/MS	20.4; 4.4; 4.7; 10.3; 12.7; 25.1; 21.8; 7.7; 15.6	16879; 6060.5; 3019; 1434.9; 19202; 25105; 23618; 27515; 22723	5965.3; 0; 0; 0; 10123; 7020.9; 14624; 10158; 12706	0; 0; 0; 1; 0; 1; 1; 0; 1
alr3858	0.403806	1	false	truth	0.8579	0.355351	0.25057	0.0687266	0.653954	1.18847	3; 2; 4; 4; 1; 4; 3; 5; 3	3; 2; 4; 4; 1; 4; 3; 5; 3	3; 2; 4; 4; 1; 4; 3; 5; 3	3	By MS/MS; By MS/MS; By MS/MS; By MS/MS; By matching; By MS/MS; By MS/MS; By MS/MS; By MS/MS	11.2; 6.3; 12.1; 14.3; 3.7; 14.3; 8.4; 19.9; 8.9	14112; 21056; 9046.8; 24984; 3679.5; 49957; 50152; 37005; 78430	19828; 22852; 15765; 14322; 0; 16629; 15791; 23998; 23486	4; 2; 3; 5; 0; 1; 1; 7; 2	6; 1; 1; 4; 3; 4; 4; 4; 4	6; 1; 1; 4; 3; 4; 4; 4; 4	6; 1; 1; 4; 3; 4; 4; 4; 4	4	By MS/MS; By MS/MS; By MS/MS; By MS/MS; By MS/MS; By MS/MS; By MS/MS; By MS/MS; By MS/MS	21.3; 2.6; 3.7; 18.2; 10.7; 18.5; 14.3; 14.3; 13.6	57625; 6348.8; 6009.4; 0; 54037; 56426; 36888; 24898; 111350	24947; 0; 0; 0; 31116; 27106; 22540; 13941; 13572	1; 1; 0; 3; 2; 4; 3; 1; 3
alr3871	0.399665	1	false	truth	0.744302	0.374211	0.391007	0.212705	0.461006	1.42978	3; 1; 2; 3; 1; 2; 4; 4; 4	3; 1; 2; 3; 1; 2; 4; 4; 4	3; 1; 2; 3; 1; 2; 4; 4; 4	3	By MS/MS; By matching; By MS/MS; By MS/MS; By MS/MS; By MS/MS; By MS/MS; By MS/MS; By MS/MS	10.6; 3.8; 6.2; 8.8; 5; 6.4; 13.7; 13.7; 13.7	19394; 4141.9; 10963; 15326; 0; 10794; 5797.4; 22782; 12760	9037.4; 0; 6436.1; 12124; 0; 0; 0; 6591.5; 6501.4	3; 0; 1; 4; 2; 2; 5; 7; 6	1; 2; 0; 2; 3; 3; 2; 1; 1	1; 2; 0; 2; 3; 3; 2; 1; 1	1; 2; 0; 2; 3; 3; 2; 1; 1	2	By matching; By MS/MS; By matching; By MS/MS; By MS/MS; By MS/MS; By MS/MS; By MS/MS; By MS/MS	2.4; 6.2; 0; 7.6; 8.8; 11.2; 6.4; 3.8; 3.8	6108; 2475.6; 0; 21129; 21998; 4864.3; 4943.4; 3547.5; 7825.7	0; 0; 0; 13434; 15153; 0; 0; 0; 7182	0; 1; 0; 1; 4; 6; 3; 0; 2
alr3938	0.0771247	1	false	truth	1.49578	0.560104	#N/A	0.194141	#N/A	#N/A	3; 2; 1; 3; 1; 2; 3; 2; 4	3; 2; 1; 3; 1; 2; 3; 2; 4	3; 2; 1; 3; 1; 2; 3; 2; 4	2	By MS/MS; By MS/MS; By MS/MS; By MS/MS; By MS/MS; By matching; By MS/MS; By MS/MS; By MS/MS	17.9; 11.4; 4.9; 18.6; 4.9; 13; 12.7; 10.7; 25.1	7481.2; 11278; 0; 10619; 5761.4; 8608.2; 7524.3; 26593; 8485.6	0; 0; 0; 0; 0; 0; 0; 21250; 0	2; 2; 2; 2; 1; 0; 4; 2; 4	2; 1; 2; 5; 2; 4; 3; 1; 3	2; 1; 2; 5; 2; 4; 3; 1; 3	2; 1; 2; 5; 2; 4; 3; 1; 3	2	By MS/MS; By MS/MS; By MS/MS; By MS/MS; By MS/MS; By MS/MS; By MS/MS; By matching; By MS/MS	8.5; 7.2; 13.7; 29.3; 13.7; 22.1; 18.9; 7.2; 17.3	6120.1; 0; 4717.2; 45805; 16490; 38246; 23355; 5992.7; 21281	0; 0; 0; 18999; 8164.5; 16832; 26488; 0; 0	2; 1; 2; 2; 1; 3; 2; 0; 2
alr3952	0.122113	1	false	truth	0.750332	0.386889	0.225155	0.0456072	0.552944	1.01943	6; 5; 5; 4; 1; 4; 5; 5; 6	6; 5; 5; 4; 1; 4; 5; 5; 6	6; 5; 5; 4; 1; 4; 5; 5; 6	5	By MS/MS; By MS/MS; By MS/MS; By MS/MS; By MS/MS; By MS/MS; By MS/MS; By MS/MS; By MS/MS	33.9; 29.7; 20.9; 18; 5.4; 28.5; 33.9; 33.9; 38.1	40155; 29254; 26870; 26149; 30945; 28201; 96253; 89570; 73624	26958; 35917; 26022; 18048; 30344; 12271; 43145; 49364; 37532	7; 4; 4; 4; 1; 2; 5; 6; 8	6; 5; 3; 4; 5; 6; 5; 5; 5	6; 5; 3; 4; 5; 6; 5; 5; 5	6; 5; 3; 4; 5; 6; 5; 5; 5	5	By MS/MS; By MS/MS; By MS/MS; By MS/MS; By MS/MS; By MS/MS; By MS/MS; By MS/MS; By MS/MS	33.9; 26.8; 21.3; 29.7; 29.7; 33.9; 25.1; 25.1; 29.7	56089; 40003; 31988; 78323; 100510; 100090; 119230; 74464; 99471	34190; 28821; 34153; 31232; 30095; 41735; 56914; 77056; 48994	8; 6; 4; 5; 2; 5; 6; 2; 8
alr4017	0.133496	1	false	truth	2.10074	0.825463	1.15332	0.0491039	1.02153	3.39691	3; 2; 3; 2; 0; 2; 3; 2; 2	3; 2; 3; 2; 0; 2; 3; 2; 2	3; 2; 3; 2; 0; 2; 3; 2; 2	2	By MS/MS; By MS/MS; By MS/MS; By MS/MS; By matching; By MS/MS; By MS/MS; By MS/MS; By MS/MS	9.6; 6.7; 9.8; 6.7; 0; 6.7; 12.4; 6.7; 10.3	9830.4; 15063; 8854; 6759.2; 0; 16708; 12832; 11790; 12179	7093.7; 15411; 0; 0; 0; 14152; 0; 0; 0	1; 1; 2; 2; 0; 1; 2; 2; 1	1; 1; 1; 1; 0; 4; 3; 0; 3	1; 1; 1; 1; 0; 4; 3; 0; 3	1; 1; 1; 1; 0; 4; 3; 0; 3	1	By MS/MS; By MS/MS; By matching; By MS/MS; By matching; By MS/MS; By MS/MS; By matching; By MS/MS	3.6; 2.9; 3.1; 3.1; 0; 16.3; 12.9; 0; 10	0; 0; 8909; 1457.6; 0; 10229; 10421; 0; 11515	0; 0; 0; 0; 0; 7027.7; 6254.9; 0; 0	1; 1; 0; 1; 0; 3; 3; 0; 3
alr4058	0.264326	1	false	false	2.85223	4.28204	3.06998	0.318144	0.234204	8.13187	1; 1; 2; 1; 1; 1; 2; 1; 1	1; 1; 2; 1; 1; 1; 2; 1; 1	1; 1; 2; 1; 1; 1; 2; 1; 1	1	By matching; By matching; By MS/MS; By matching; By matching; By MS/MS; By MS/MS; By matching; By matching	1.8; 1.8; 3.3; 1.8; 1.8; 1.8; 3.3; 1.8; 1.8	13193; 12722; 1629700; 1537400; 1533200; 1404400; 35396; 783380; 823410	58908; 0; 1786700; 387110; 547230; 0; 8011.3; 429610; 0	0; 0; 3; 0; 0; 1; 1; 0; 0	2; 1; 1; 2; 1; 1; 1; 1; 2	2; 1; 1; 2; 1; 1; 1; 1; 2	2; 1; 1; 2; 1; 1; 1; 1; 2	1	By matching; By matching; By matching; By matching; By matching; By MS/MS; By MS/MS; By matching; By MS/MS	3.3; 1.8; 1.8; 3.3; 1.8; 1.8; 1.8; 1.8; 3.3	10449; 11703; 2699.3; 572310; 574400; 619850; 467230; 464570; 487340	12539; 59121; 0; 139230; 321330; 0; 531920; 353760; 109560	0; 0; 0; 0; 0; 3; 3; 0; 3
alr4094	0.00725721	1	false	truth	0.302115	0.201458	0.320143	0.906077	0.120563	6.31271	4; 1; 3; 2; 2; 2; 3; 1; 4	4; 1; 3; 2; 2; 2; 3; 1; 4	4; 1; 3; 2; 2; 2; 3; 1; 4	2	By MS/MS; By MS/MS; By MS/MS; By MS/MS; By MS/MS; By MS/MS; By MS/MS; By MS/MS; By MS/MS	14.7; 2.4; 13; 10; 8.6; 8.6; 11; 6.1; 16.4	7674; 7936.2; 6218.1; 2642.5; 10739; 2029.7; 10526; 0; 3661.3	0; 0; 6021.9; 0; 11505; 0; 15705; 0; 0	3; 1; 2; 1; 1; 2; 2; 1; 3	5; 1; 2; 2; 5; 2; 3; 1; 2	5; 1; 2; 2; 5; 2; 3; 1; 2	5; 1; 2; 2; 5; 2; 3; 1; 2	2	By MS/MS; By MS/MS; By matching; By MS/MS; By MS/MS; By MS/MS; By MS/MS; By matching; By MS/MS	18.6; 6.1; 6.1; 8.6; 18.3; 5.9; 12; 3.9; 5.9	12876; 0; 11030; 20453; 43204; 108360; 18000; 8368.4; 23791	0; 0; 0; 0; 19940; 56539; 0; 0; 0	2; 1; 0; 1; 4; 2; 3; 0; 1
alr4100	0.403793	1	false	truth	1.29561	0.924971	0.746599	0.279681	0.785303	2.81202	2; 2; 3; 2; 2; 3; 2; 4; 2	2; 2; 3; 2; 2; 3; 2; 4; 2	2; 2; 3; 2; 2; 3; 2; 4; 2	2	By MS/MS; By MS/MS; By MS/MS; By MS/MS; By MS/MS; By matching; By MS/MS; By MS/MS; By MS/MS	9.4; 13.1; 16.3; 13.9; 13.1; 20.8; 9.4; 24.1; 9.4	10497; 28582; 25748; 4961.5; 731.67; 19922; 14352; 17644; 0	11809; 18183; 11982; 0; 0; 6776.8; 11366; 7887.1; 0	2; 2; 2; 1; 1; 0; 2; 2; 2	1; 3; 2; 1; 1; 1; 3; 2; 2	1; 3; 2; 1; 1; 1; 3; 2; 2	1; 3; 2; 1; 1; 1; 3; 2; 2	2	By matching; By matching; By matching; By MS/MS; By MS/MS; By MS/MS; By MS/MS; By matching; By MS/MS	6.9; 16.3; 13.1; 6.9; 7.8; 6.1; 20.8; 13.1; 9.4	3877.7; 24081; 14472; 18703; 0; 36621; 22581; 8813.1; 10883	0; 14860; 7479.4; 0; 0; 0; 4157.4; 3501.6; 11674	0; 0; 0; 1; 1; 1; 1; 0; 1
alr4111	0.00630173	1	false	truth	0.739536	0.285576	0.332096	0.175269	0.498672	1.29473	3; 3; 4; 4; 3; 4; 3; 1; 5	3; 3; 4; 4; 3; 4; 3; 1; 5	3; 3; 4; 4; 3; 4; 3; 1; 5	3	By MS/MS; By matching; By MS/MS; By MS/MS; By MS/MS; By MS/MS; By MS/MS; By matching; By MS/MS	6.6; 7.5; 8.2; 11; 8; 9.4; 6.7; 2.2; 13.3	12103; 22367; 35469; 8136.1; 11019; 52031; 27119; 1847.9; 17361	0; 14693; 11203; 10249; 8768.8; 11603; 12086; 0; 18331	1; 0; 1; 2; 0; 0; 2; 0; 3	0; 0; 1; 1; 4; 7; 3; 0; 1	0; 0; 1; 1; 4; 7; 3; 0; 1	0; 0; 1; 1; 4; 7; 3; 0; 1	1	By matching; By matching; By matching; By matching; By MS/MS; By MS/MS; By MS/MS; By matching; By matching	0; 0; 1.3; 1.4; 8.9; 19.8; 7.7; 0; 2.8	0; 0; 2768.3; 10223; 105670; 66343; 6260.7; 0; 1043.4	0; 0; 0; 0; 18901; 14499; 0; 0; 0	0; 0; 0; 0; 1; 3; 3; 0; 0
alr4123	0.132758	1	false	truth	1.31357	0.709786	0.413068	0.0712284	0.974014	1.8546	9; 8; 9; 7; 8; 7; 7; 7; 8	9; 8; 9; 7; 8; 7; 7; 7; 8	9; 8; 9; 7; 8; 7; 7; 7; 8	8	By MS/MS; By MS/MS; By MS/MS; By MS/MS; By MS/MS; By MS/MS; By MS/MS; By MS/MS; By MS/MS	38.3; 33.5; 38.3; 26.9; 33.5; 31.4; 26.9; 32.3; 33.5	107960; 126880; 156430; 257430; 154340; 201390; 105100; 44013; 205640	88340; 87493; 80333; 108900; 81360; 73049; 75631; 26660; 77900	13; 9; 14; 24; 13; 6; 17; 11; 22	7; 6; 7; 6; 7; 7; 6; 6; 7	7; 6; 7; 6; 7; 7; 6; 6; 7	7; 6; 7; 6; 7; 7; 6; 6; 7	7	By MS/MS; By MS/MS; By MS/MS; By MS/MS; By MS/MS; By MS/MS; By MS/MS; By MS/MS; By MS/MS	26.9; 25.4; 32; 23.1; 26.9; 32; 25.4; 28.1; 26.9	94732; 35082; 105890; 58819; 100730; 156430; 121510; 153240; 68117	74811; 39760; 77850; 35037; 26629; 96267; 63412; 98942; 36682	14; 8; 6; 6; 4; 8; 14; 2; 7
alr4124	0.00644204	1	false	truth	0.653569	0.246818	0.153697	0.0214739	0.511877	0.823947	4; 3; 4; 5; 4; 2; 3; 3; 4	4; 3; 4; 5; 4; 2; 3; 3; 4	4; 3; 4; 5; 4; 2; 3; 3; 4	4	By MS/MS; By MS/MS; By MS/MS; By MS/MS; By MS/MS; By MS/MS; By MS/MS; By MS/MS; By MS/MS	13.3; 9.3; 11.2; 17.4; 12.9; 6.2; 9.8; 10.2; 12.4	24828; 10968; 14055; 40175; 41396; 19417; 16686; 9837.9; 16967	18136; 11719; 19336; 19721; 19810; 0; 12287; 12022; 13115	4; 2; 4; 8; 4; 0; 4; 3; 5	5; 6; 4; 7; 5; 6; 3; 2; 5	5; 6; 4; 7; 5; 6; 3; 2; 5	5; 6; 4; 7; 5; 6; 3; 2; 5	5	By MS/MS; By MS/MS; By MS/MS; By MS/MS; By MS/MS; By MS/MS; By MS/MS; By matching; By MS/MS	16.9; 21.4; 15.5; 24; 15.5; 21; 9.8; 6.2; 15.5	23896; 31267; 18031; 86902; 63476; 46909; 25434; 13810; 50520	23080; 30219; 18062; 30090; 27371; 30225; 18031; 0; 22954	4; 8; 3; 6; 2; 5; 3; 0; 7
alr4164	0.0469858	1	false	truth	0.678722	0.233712	0.192995	0.0375632	0.506711	0.903713	2; 1; 2; 4; 2; 1; 4; 2; 4	2; 1; 2; 4; 2; 1; 4; 2; 4	2; 1; 2; 4; 2; 1; 4; 2; 4	2	By MS/MS; By MS/MS; By MS/MS; By MS/MS; By MS/MS; By matching; By MS/MS; By MS/MS; By MS/MS	10.8; 4.3; 13; 21.1; 11.7; 2.7; 23.3; 8.1; 20.3	18065; 15009; 16117; 50106; 27552; 5008.5; 15680; 0; 17945	16477; 0; 16862; 16106; 13989; 0; 8330.7; 0; 13373	1; 1; 1; 2; 1; 0; 3; 2; 4	3; 4; 3; 3; 2; 3; 1; 3; 2	3; 4; 3; 3; 2; 3; 1; 3; 2	3; 4; 3; 3; 2; 3; 1; 3; 2	3	By MS/MS; By MS/MS; By MS/MS; By MS/MS; By MS/MS; By MS/MS; By MS/MS; By MS/MS; By MS/MS	16.8; 22.5; 15.7; 17.3; 10; 15.2; 7.3; 14.4; 7	2971.1; 25112; 18385; 33884; 44405; 4573.5; 0; 20323; 26409	0; 18577; 0; 22501; 23129; 0; 0; 0; 22738	2; 2; 1; 4; 2; 2; 2; 3; 1
alr4171	0.992425	1	false	truth	1.00298	0.525086	0.740963	0.119364	0.337727	1.94013	2; 1; 1; 2; 2; 4; 3; 1; 4	2; 1; 1; 2; 2; 4; 3; 1; 4	2; 1; 1; 2; 2; 4; 3; 1; 4	2	By MS/MS; By MS/MS; By MS/MS; By MS/MS; By MS/MS; By MS/MS; By MS/MS; By MS/MS; By MS/MS	7.9; 4.7; 3.2; 7.9; 10.7; 17; 13.9; 6; 17.4	0; 1934.3; 1147.8; 7260.3; 9017.7; 15724; 17815; 9301.3; 25574	0; 0; 0; 0; 0; 5715.1; 12403; 0; 17557	2; 1; 1; 1; 2; 1; 3; 1; 4	2; 1; 2; 1; 2; 3; 1; 2; 1	2; 1; 2; 1; 2; 3; 1; 2; 1	2; 1; 2; 1; 2; 3; 1; 2; 1	2	By MS/MS; By MS/MS; By MS/MS; By matching; By matching; By MS/MS; By MS/MS; By MS/MS; By MS/MS	8.2; 3.5; 7.9; 3.2; 9.1; 13.9; 4.7; 11; 3.2	25.02; 1814.5; 3863.6; 14502; 33251; 33592; 0; 12235; 9705.1	0; 0; 0; 0; 12053; 10781; 0; 0; 0	1; 1; 1; 0; 0; 3; 2; 1; 1
alr4174	0.11751	1	false	truth	1.33842	0.534709	0.440199	0.0827931	0.983984	1.93448	2; 2; 2; 2; 1; 1; 1; 0; 2	2; 2; 2; 2; 1; 1; 1; 0; 2	2; 2; 2; 2; 1; 1; 1; 0; 2	2	By MS/MS; By MS/MS; By matching; By MS/MS; By MS/MS; By matching; By MS/MS; By matching; By MS/MS	13.3; 13.3; 12.8; 13.3; 6.6; 6.6; 6.6; 0; 12.4	16408; 16215; 17555; 35598; 6651.5; 5802.9; 0; 0; 0	13921; 13884; 0; 16532; 0; 0; 0; 0; 0	1; 1; 0; 1; 1; 0; 1; 0; 2	3; 2; 4; 3; 3; 1; 1; 2; 5	3; 2; 4; 3; 3; 1; 1; 2; 5	3; 2; 4; 3; 3; 1; 1; 2; 5	3	By MS/MS; By MS/MS; By MS/MS; By matching; By MS/MS; By MS/MS; By MS/MS; By matching; By MS/MS	19; 12.8; 25.7; 19.5; 19.5; 6.6; 6.2; 12.8; 31.4	21663; 8992.4; 19371; 19066; 14055; 0; 0; 14641; 15044	11971; 12581; 13130; 7879.6; 11532; 0; 0; 0; 5310.8	1; 2; 1; 0; 2; 1; 1; 0; 1
alr4235	0.812629	1	false	truth	0.926015	0.518177	0.573668	0.120081	0.427906	1.67687	1; 2; 2; 1; 0; 2; 1; 2; 0	1; 2; 2; 1; 0; 2; 1; 2; 0	1; 2; 2; 1; 0; 2; 1; 2; 0	1	By matching; By matching; By matching; By matching; By matching; By matching; By MS/MS; By MS/MS; By matching	5.4; 8.3; 8.3; 5.4; 0; 8.3; 5.4; 8.3; 0	3311.5; 6052.8; 6598; 1679; 0; 2599.7; 3042.4; 15725; 0	0; 6197.8; 0; 0; 0; 3552.4; 0; 8887.5; 0	0; 0; 0; 0; 0; 0; 1; 2; 0	2; 0; 1; 3; 2; 2; 2; 2; 2	2; 0; 1; 3; 2; 2; 2; 2; 2	2; 0; 1; 3; 2; 2; 2; 2; 2	2	By matching; By matching; By matching; By matching; By matching; By matching; By MS/MS; By matching; By MS/MS	8.3; 0; 5.4; 12.9; 8.3; 8; 8; 8; 7.5	6933.3; 0; 1670.7; 9080.4; 10428; 12687; 12617; 16285; 46191	5790.8; 0; 0; 5172.3; 7374.9; 0; 10660; 0; 0	0; 0; 0; 0; 0; 0; 1; 0; 1
alr4251	0.0202215	1	false	truth	0.594988	0.278352	0.180658	0.0511441	0.438843	0.815273	1; 1; 2; 1; 3; 1; 1; 1; 1	1; 1; 2; 1; 3; 1; 1; 1; 1	1; 1; 2; 1; 3; 1; 1; 1; 1	1	By MS/MS; By MS/MS; By MS/MS; By MS/MS; By MS/MS; By MS/MS; By MS/MS; By MS/MS; By MS/MS	14.4; 14.4; 29.7; 14.4; 29.7; 14.4; 14.4; 14.4; 14.4	51391; 45004; 50152; 48628; 52097; 39586; 45092; 17803; 34790	33189; 33136; 33744; 25987; 25411; 0; 28920; 8879.2; 21455	2; 3; 2; 3; 2; 2; 4; 6; 3	1; 3; 2; 2; 1; 3; 1; 1; 2	1; 3; 2; 2; 1; 3; 1; 1; 2	1; 3; 2; 2; 1; 3; 1; 1; 2	2	By MS/MS; By MS/MS; By MS/MS; By MS/MS; By MS/MS; By MS/MS; By MS/MS; By MS/MS; By MS/MS	14.4; 29.7; 29.7; 14.4; 14.4; 29.7; 14.4; 14.4; 14.4	19553; 41612; 42339; 123750; 108450; 92422; 57365; 87916; 91786	0; 25065; 28841; 65757; 62535; 39123; 0; 46842; 53716	2; 2; 1; 5; 4; 3; 2; 1; 3
alr4271	0.511421	1	false	truth	1.26352	0.936954	0.833701	0.355376	0.70971	3.21047	2; 2; 2; 3; 2; 1; 3; 4; 1	2; 2; 2; 3; 2; 1; 3; 4; 1	2; 2; 2; 3; 2; 1; 3; 4; 1	2	By MS/MS; By MS/MS; By MS/MS; By MS/MS; By matching; By matching; By MS/MS; By MS/MS; By MS/MS	7.7; 7.7; 9.7; 13.7; 9.7; 3.6; 9.7; 19; 4	11935; 33045; 15996; 16591; 14687; 6290.3; 26289; 23948; 22326	11355; 24381; 12187; 14071; 0; 0; 11754; 7645.6; 0	2; 1; 2; 2; 0; 0; 2; 2; 1	3; 1; 2; 1; 2; 2; 1; 1; 2	3; 1; 2; 1; 2; 2; 1; 1; 2	3; 1; 2; 1; 2; 2; 1; 1; 2	2	By matching; By matching; By matching; By matching; By matching; By MS/MS; By MS/MS; By matching; By MS/MS	11.7; 4; 7.7; 3.6; 8.1; 9.7; 4; 4; 8.1	7070.7; 3769.1; 14049; 4502.7; 9336; 29738; 19451; 23612; 5436.5	3655.2; 0; 15538; 0; 4819.3; 18170; 0; 0; 0	0; 0; 0; 0; 0; 2; 1; 0; 2
alr4291	0.917966	1	false	truth	1.01482	0.427199	0.248613	0.0497003	0.807397	1.32839	7; 9; 7; 6; 5; 9; 7; 5; 6	7; 9; 7; 6; 5; 9; 7; 5; 6	7; 9; 7; 6; 5; 9; 7; 5; 6	7	By MS/MS; By MS/MS; By MS/MS; By MS/MS; By MS/MS; By MS/MS; By MS/MS; By MS/MS; By MS/MS	22.7; 33.1; 26.4; 19.4; 19.8; 32.2; 22.9; 20; 16.1	145890; 154690; 66948; 136860; 113690; 175980; 147230; 118900; 157260	85913; 82578; 54431; 65578; 72690; 70981; 114170; 88581; 104230	15; 14; 13; 10; 1; 7; 13; 9; 19	7; 6; 6; 5; 5; 6; 6; 5; 7	7; 6; 6; 5; 5; 6; 6; 5; 7	7; 6; 6; 5; 5; 6; 6; 5; 7	6	By MS/MS; By MS/MS; By MS/MS; By MS/MS; By MS/MS; By MS/MS; By MS/MS; By MS/MS; By MS/MS	23.7; 15.9; 22.7; 19.8; 19.4; 19.8; 20.3; 12.4; 22.9	34793; 67185; 67176; 154930; 149910; 139740; 61022; 137650; 155720	71054; 50815; 52015; 76740; 112110; 67215; 85444; 97177; 126860	6; 10; 13; 4; 6; 7; 10; 3; 7
alr4331	0.901962	1	false	truth	0.978101	0.506722	0.300482	0.0698025	0.731417	1.37158	6; 8; 8; 15; 4; 8; 3; 6; 7	6; 8; 8; 15; 4; 8; 3; 6; 7	6; 8; 8; 15; 4; 8; 3; 6; 7	7	By MS/MS; By MS/MS; By MS/MS; By MS/MS; By MS/MS; By MS/MS; By MS/MS; By MS/MS; By MS/MS	11.6; 18.2; 17.5; 29; 9.9; 18.3; 8.2; 17.5; 15.4	21191; 46114; 49440; 19832; 1381.8; 163690; 19325; 23655; 46429	17709; 27791; 30516; 29890; 0; 37651; 34505; 27678; 42293	3; 4; 3; 10; 3; 2; 3; 4; 7	5; 7; 4; 7; 7; 7; 9; 4; 10	5; 7; 4; 7; 7; 7; 9; 4; 10	5; 7; 4; 7; 7; 7; 9; 4; 10	7	By MS/MS; By MS/MS; By MS/MS; By MS/MS; By MS/MS; By MS/MS; By MS/MS; By MS/MS; By MS/MS	13.8; 12.4; 7.4; 16.9; 16.9; 18; 18.3; 8; 23.7	26677; 23370; 17468; 40719; 65709; 61574; 43482; 32065; 59210	18879; 35636; 58553; 15941; 37046; 39180; 26282; 30563; 25227	2; 5; 2; 2; 2; 7; 7; 1; 5
alr4344	0.238364	1	false	truth	0.814597	0.307897	0.24985	0.00969512	0.571375	1.07377	5; 1; 3; 7; 5; 4; 4; 2; 5	5; 1; 3; 7; 5; 4; 4; 2; 5	5; 1; 3; 7; 5; 4; 4; 2; 5	4	By MS/MS; By MS/MS; By MS/MS; By MS/MS; By MS/MS; By MS/MS; By MS/MS; By matching; By MS/MS	4.9; 1.2; 3; 6.9; 5.9; 4.2; 4.7; 2.6; 5.5	17788; 4451.2; 12751; 17613; 6749.9; 19346; 3573.6; 1930.3; 5836.5	17110; 0; 10307; 10949; 0; 18872; 0; 0; 8832.8	3; 1; 2; 6; 3; 1; 5; 0; 5	2; 6; 0; 3; 5; 7; 4; 5; 7	2; 6; 0; 3; 5; 7; 4; 5; 7	2; 6; 0; 3; 5; 7; 4; 5; 7	5	By matching; By MS/MS; By matching; By MS/MS; By MS/MS; By MS/MS; By MS/MS; By MS/MS; By MS/MS	2.2; 5.7; 0; 3.1; 5.3; 6.8; 4.4; 5; 6.7	8394.7; 23968; 0; 22576; 69313; 21574; 10866; 55201; 32431	0; 17592; 0; 0; 16204; 20853; 16462; 18623; 13242	0; 5; 0; 2; 1; 6; 4; 1; 5
alr4373	0.108046	1	false	truth	1.44344	0.648865	0.569754	0.118032	0.999914	2.2733	2; 3; 4; 2; 0; 3; 0; 2; 3	2; 3; 4; 2; 0; 3; 0; 2; 3	2; 3; 4; 2; 0; 3; 0; 2; 3	2	By MS/MS; By matching; By MS/MS; By MS/MS; By matching; By matching; By matching; By MS/MS; By MS/MS	16.6; 23.8; 39.1; 22.5; 0; 23.8; 0; 13.9; 23.8	10458; 35606; 42668; 10319; 0; 50487; 0; 17596; 41578	17141; 22492; 21480; 0; 0; 20777; 0; 11392; 14907	1; 0; 3; 0; 0; 0; 0; 1; 2	1; 2; 3; 3; 1; 2; 3; 2; 1	1; 2; 3; 3; 1; 2; 3; 2; 1	1; 2; 3; 3; 1; 2; 3; 2; 1	2	By matching; By matching; By matching; By MS/MS; By matching; By MS/MS; By MS/MS; By MS/MS; By MS/MS	9.9; 16.6; 23.8; 23.8; 7.3; 13.9; 23.8; 13.9; 7.3	10262; 21260; 15113; 44583; 20433; 28010; 24857; 45759; 14778	0; 0; 8752.4; 12097; 0; 17103; 21512; 0; 0	0; 0; 0; 1; 0; 1; 3; 1; 1
alr4380	0.944533	1	false	truth	0.974821	0.722604	0.652399	0.180732	0.437695	1.94204	5; 4; 4; 3; 3; 1; 1; 4; 2	5; 4; 4; 3; 3; 1; 1; 4; 2	5; 4; 3; 3; 3; 1; 1; 4; 2	3	By MS/MS; By MS/MS; By MS/MS; By MS/MS; By MS/MS; By matching; By matching; By MS/MS; By MS/MS	27; 19; 18.1; 18.4; 17.8; 3.4; 5.8; 18.4; 9.8	13171; 16747; 13198; 14722; 8605.9; 9777.8; 3605.7; 9012.5; 8962.1	5092.5; 17222; 10900; 0; 0; 0; 0; 22513; 0	5; 2; 3; 2; 3; 0; 0; 2; 2	5; 2; 2; 4; 2; 3; 1; 2; 1	5; 2; 2; 4; 2; 3; 1; 2; 1	5; 2; 2; 4; 2; 3; 1; 2; 1	2	By MS/MS; By MS/MS; By matching; By MS/MS; By matching; By MS/MS; By matching; By matching; By matching	27.9; 12.3; 9.5; 21.8; 6.7; 10.7; 3.4; 6.4; 3.4	37853; 17574; 9744.1; 12521; 21114; 41493; 5325; 9625.4; 2953.3	19489; 13318; 9809.3; 6907.4; 0; 23222; 0; 0; 0	1; 1; 0; 1; 0; 1; 0; 0; 0
alr4385	0.945876	1	false	truth	1.02991	0.835847	#N/A	0.911949	#N/A	#N/A	2; 1; 2; 2; 0; 3; 2; 2; 2	2; 1; 2; 2; 0; 3; 2; 2; 2	2; 1; 2; 2; 0; 3; 2; 2; 2	2	By MS/MS; By matching; By MS/MS; By MS/MS; By matching; By MS/MS; By MS/MS; By MS/MS; By MS/MS	11.6; 5.4; 9.1; 9.1; 0; 15.4; 10.8; 10.8; 10.8	0; 4759.2; 768.66; 9169.2; 0; 8846.5; 0; 2044; 2486.8	0; 0; 0; 11510; 0; 0; 0; 0; 0	2; 0; 2; 1; 0; 1; 2; 1; 1	1; 2; 3; 2; 1; 3; 1; 1; 2	1; 2; 3; 2; 1; 3; 1; 1; 2	1; 2; 3; 2; 1; 3; 1; 1; 2	2	By MS/MS; By MS/MS; By MS/MS; By matching; By matching; By MS/MS; By MS/MS; By matching; By MS/MS	5.4; 10.8; 16.2; 9.1; 5.4; 16.2; 5.4; 5.4; 10.8	0; 5469.8; 16917; 9618.2; 7772.4; 15567; 19372; 20940; 34112	0; 0; 9076.2; 7724.6; 0; 6192.4; 0; 0; 22842	1; 1; 3; 0; 0; 1; 1; 0; 2
alr4404	0.968474	1	false	truth	1.01377	0.909087	0.612399	0.248282	0.566934	2.13028	5; 6; 6; 4; 2; 5; 5; 2; 4	5; 6; 6; 4; 2; 5; 5; 2; 4	5; 6; 6; 4; 2; 5; 5; 2; 4	5	By MS/MS; By MS/MS; By MS/MS; By MS/MS; By MS/MS; By MS/MS; By MS/MS; By MS/MS; By MS/MS	33.5; 34; 34; 28.3; 15.6; 34.9; 28.8; 18.4; 30.2	169430; 149150; 222750; 13686; 15974; 238170; 20670; 1723.8; 72513	74463; 79133; 109360; 38964; 0; 112800; 39082; 0; 47103	13; 7; 11; 3; 0; 2; 4; 3; 3	4; 4; 4; 5; 3; 3; 2; 6; 3	4; 4; 4; 5; 3; 3; 2; 6; 3	4; 4; 4; 5; 3; 3; 2; 6; 3	4	By MS/MS; By MS/MS; By MS/MS; By MS/MS; By MS/MS; By MS/MS; By MS/MS; By MS/MS; By MS/MS	24.1; 24.1; 24.1; 30.7; 23.6; 20.8; 15.6; 29.2; 20.8	70081; 106570; 130130; 21694; 34817; 237800; 165690; 211910; 127400	30713; 76538; 55309; 14720; 0; 97947; 0; 56277; 162480	1; 4; 3; 2; 1; 2; 1; 1; 5
alr4416	0.335108	1	false	truth	0.708869	0.417007	0.460739	0.0196799	0.257541	1.18866	1; 3; 0; 2; 5; 2; 2; 1; 2	1; 3; 0; 2; 5; 2; 2; 1; 2	1; 3; 0; 2; 5; 2; 2; 1; 2	2	By MS/MS; By matching; By matching; By matching; By MS/MS; By matching; By MS/MS; By MS/MS; By MS/MS	3.7; 15.7; 0; 9.9; 28.7; 11.7; 14.5; 7.1; 8.6	0; 14030; 0; 38211; 22348; 7207.7; 24636; 0; 6911.4	0; 0; 0; 0; 6630.1; 0; 22914; 0; 9682.6	2; 0; 0; 0; 2; 0; 1; 1; 1	2; 2; 2; 2; 3; 3; 2; 4; 4	2; 2; 2; 2; 3; 3; 2; 4; 4	2; 2; 2; 2; 3; 3; 2; 4; 4	2	By MS/MS; By matching; By MS/MS; By MS/MS; By MS/MS; By MS/MS; By MS/MS; By MS/MS; By MS/MS	11.7; 9.6; 11.1; 8.3; 19.4; 20.4; 10.8; 23.8; 20.1	6510.8; 4643; 30.778; 23453; 7123.1; 29516; 0; 29470; 40264	13354; 0; 0; 22842; 0; 20286; 0; 16048; 20024	1; 0; 1; 1; 1; 1; 2; 1; 1
alr4504	0.0309796	1	false	truth	0.232306	0.216862	0.134421	0.273528	0.139432	0.500114	4; 1; 1; 3; 3; 1; 3; 1; 1	4; 1; 1; 3; 3; 1; 3; 1; 1	4; 1; 1; 3; 3; 1; 3; 1; 1	1	By matching; By matching; By matching; By matching; By matching; By matching; By matching; By matching; By matching	18; 5.8; 3.1; 15.3; 14.7; 4.3; 14.7; 5.8; 5.8	25895; 2864.5; 10010; 11516; 22348; 1907.9; 19943; 4719.2; 2082	20125; 0; 0; 10428; 11626; 0; 14665; 9139; 0	0; 0; 0; 0; 0; 0; 0; 0; 0	4; 3; 5; 3; 6; 4; 10; 7; 7	4; 3; 5; 3; 6; 4; 10; 7; 7	4; 3; 5; 3; 6; 4; 10; 7; 7	5	By MS/MS; By MS/MS; By MS/MS; By MS/MS; By MS/MS; By MS/MS; By MS/MS; By MS/MS; By MS/MS	19.3; 15; 20.2; 14.7; 29.7; 17.4; 40.1; 29.4; 28.7	47824; 24488; 28378; 32745; 49550; 103970; 218780; 195490; 240730	22477; 20537; 25645; 18484; 31345; 58436; 100610; 82361; 157040	4; 1; 2; 1; 3; 3; 15; 4; 9
alr4505	0.00137545	1	false	truth	0.0504123	0.0299905	#N/A	0.135978	#N/A	#N/A	1; 1; 1; 1; 0; 0; 0; 0; 2	1; 1; 1; 1; 0; 0; 0; 0; 2	1; 1; 1; 1; 0; 0; 0; 0; 2	1	By matching; By matching; By matching; By matching; By matching; By matching; By matching; By matching; By matching	4.5; 4.5; 4.2; 4.5; 0; 0; 0; 0; 8.6	4405.7; 2253.1; 2516.2; 3679.6; 0; 0; 0; 0; 8575.5	0; 0; 0; 0; 0; 0; 0; 0; 5849.2	0; 0; 0; 0; 0; 0; 0; 0; 0	6; 6; 7; 5; 6; 6; 8; 6; 6	6; 6; 7; 5; 6; 6; 8; 6; 6	6; 6; 7; 5; 6; 6; 8; 6; 6	6	By MS/MS; By MS/MS; By MS/MS; By MS/MS; By MS/MS; By MS/MS; By MS/MS; By MS/MS; By MS/MS	26.2; 26.2; 26.2; 22.8; 26.2; 26.2; 32.6; 26.2; 26.2	71621; 106080; 116390; 196180; 145270; 202870; 284490; 289800; 393170	46103; 78418; 101090; 86418; 67147; 90838; 171220; 159550; 246880	7; 8; 11; 9; 10; 13; 18; 8; 14
alr4514	0.375828	1	false	truth	0.759473	0.579595	0.390439	0.147632	0.448127	1.3339	3; 3; 3; 2; 3; 2; 3; 2; 2	3; 3; 3; 2; 3; 2; 3; 2; 2	3; 3; 3; 2; 3; 2; 3; 2; 2	3	By MS/MS; By MS/MS; By MS/MS; By MS/MS; By MS/MS; By MS/MS; By MS/MS; By MS/MS; By MS/MS	31.8; 38.2; 40; 25.5; 40; 23.6; 40; 29.1; 23.6	15903; 10104; 23625; 12593; 7025.6; 44948; 2126.9; 9224.3; 0	28360; 25175; 12259; 25193; 6999.6; 28046; 0; 6709.9; 0	7; 2; 7; 4; 2; 3; 2; 1; 5	3; 3; 4; 2; 2; 3; 2; 1; 3	3; 3; 4; 2; 2; 3; 2; 1; 3	3; 3; 4; 2; 2; 3; 2; 1; 3	3	By MS/MS; By MS/MS; By MS/MS; By MS/MS; By MS/MS; By MS/MS; By MS/MS; By matching; By MS/MS	38.2; 40; 46.4; 23.6; 23.6; 31.8; 23.6; 16.4; 31.8	15693; 34395; 5093.6; 116460; 87161; 29583; 16403; 2526.4; 37125	14453; 13036; 11241; 52855; 47586; 21067; 0; 0; 26406	4; 8; 4; 10; 5; 9; 5; 0; 5
alr4528	0.00928117	1	false	truth	0	#N/A	#N/A	#N/A	#N/A	#N/A	0; 2; 2; 1; 2; 0; 1; 1; 1	0; 2; 2; 1; 2; 0; 1; 1; 1	0; 2; 2; 1; 2; 0; 1; 1; 1	1	By matching; By matching; By MS/MS; By matching; By matching; By matching; By matching; By matching; By matching	0; 6.4; 6.4; 2.8; 6.4; 0; 2.8; 3.6; 2.8	0; 73047; 74990; 2930.3; 17847; 0; 9364.3; 23026; 8789.7	0; 0; 0; 0; 0; 0; 0; 0; 0	0; 0; 1; 0; 0; 0; 0; 0; 0	2; 1; 4; 1; 1; 3; 2; 3; 2	2; 1; 4; 1; 1; 3; 2; 3; 2	2; 1; 4; 1; 1; 3; 2; 3; 2	2	By matching; By matching; By MS/MS; By matching; By matching; By MS/MS; By matching; By matching; By matching	6.7; 2.8; 17.2; 3.6; 3.6; 10; 5.7; 9.3; 5.7	6986.8; 87809; 142020; 6588.3; 13363; 17438; 19893; 8937.5; 8634.3	0; 0; 0; 0; 0; 0; 8087.5; 5076.2; 5767.1	0; 0; 1; 0; 0; 3; 0; 0; 0
alr4548; alr4290	0.0563019	1	false	truth	1.59323	1.06778	0.64809	0.10884	1.07424	2.50138	4; 5; 4; 3; 5; 3; 5; 2; 5	4; 5; 4; 3; 5; 3; 5; 2; 5	4; 5; 4; 3; 5; 3; 5; 2; 5	4	By MS/MS; By MS/MS; By MS/MS; By MS/MS; By MS/MS; By MS/MS; By MS/MS; By MS/MS; By MS/MS	13.7; 17.4; 14.2; 9.1; 17.4; 11.7; 17.4; 6.6; 17.4	223150; 255410; 210730; 307930; 300300; 218800; 456190; 426200; 491720	231850; 196330; 189370; 233800; 242340; 47766; 181260; 80972; 149520	8; 6; 7; 8; 5; 2; 7; 5; 7	4; 4; 6; 2; 3; 2; 3; 3; 3	4; 4; 6; 2; 3; 2; 3; 3; 3	4; 4; 6; 2; 3; 2; 3; 3; 3	3	By MS/MS; By MS/MS; By MS/MS; By MS/MS; By MS/MS; By MS/MS; By MS/MS; By MS/MS; By MS/MS	12; 14.2; 20.2; 5.4; 9.1; 5.4; 10.5; 10.8; 10.5	265570; 136020; 183710; 309270; 300780; 245350; 211310; 231360; 209680	172580; 128220; 168600; 142770; 25134; 106710; 0; 86773; 50452	5; 5; 8; 3; 2; 4; 6; 3; 3
alr4550; all7614	0.307038	1	false	truth	0.626374	0.607649	0.409338	0.330178	0.347355	1.52291	4; 2; 4; 4; 3; 3; 2; 3; 1	4; 2; 4; 4; 3; 3; 2; 3; 1	2; 2; 3; 3; 2; 2; 2; 3; 1	2	By MS/MS; By MS/MS; By MS/MS; By MS/MS; By MS/MS; By MS/MS; By MS/MS; By MS/MS; By MS/MS	10.6; 5.9; 9.6; 10.4; 8; 8; 4.7; 7.3; 1.7	10946; 12457; 37875; 31885; 18600; 38314; 19476; 11136; 0	7972.2; 0; 9969.9; 31381; 15363; 18832; 30159; 13670; 0	1; 1; 1; 4; 2; 1; 2; 3; 1	2; 7; 5; 3; 2; 0; 4; 0; 3	2; 7; 5; 3; 2; 0; 4; 0; 3	2; 5; 3; 2; 2; 0; 3; 0; 2	2	By MS/MS; By MS/MS; By MS/MS; By MS/MS; By MS/MS; By matching; By MS/MS; By matching; By MS/MS	6.1; 17.4; 12.3; 9.4; 4.3; 0; 10.1; 0; 7	18431; 51439; 45117; 18734; 12247; 0; 30407; 0; 20404	24775; 71206; 46648; 11810; 7188.3; 0; 20705; 0; 17216	2; 13; 7; 2; 1; 0; 2; 0; 2
alr4552	0.241689	1	false	truth	0.793726	0.430564	0.250571	0.0634154	0.583035	1.1119	7; 3; 5; 6; 5; 8; 5; 6; 6	7; 3; 5; 6; 5; 8; 5; 6; 6	7; 3; 5; 6; 5; 8; 5; 6; 6	6	By MS/MS; By MS/MS; By MS/MS; By MS/MS; By MS/MS; By MS/MS; By MS/MS; By MS/MS; By MS/MS	32.8; 14.7; 24.4; 30.9; 24.4; 41.6; 22.2; 29.1; 28.8	22055; 24157; 19094; 35590; 44353; 69561; 15567; 51009; 67375	14154; 26692; 21629; 27578; 25876; 20774; 17363; 30532; 42438	5; 1; 4; 9; 3; 0; 5; 5; 6	5; 7; 7; 8; 4; 7; 6; 6; 4	5; 7; 7; 8; 4; 7; 6; 6; 4	5; 7; 7; 8; 4; 7; 6; 6; 4	6	By MS/MS; By MS/MS; By MS/MS; By MS/MS; By MS/MS; By MS/MS; By MS/MS; By matching; By MS/MS	20.6; 35.3; 34.7; 40.9; 18.1; 32.2; 28.4; 32.2; 19.4	48903; 59887; 30670; 116900; 83404; 140630; 49945; 28247; 14992	37621; 28962; 23808; 49928; 46360; 57856; 26519; 16697; 14023	3; 4; 6; 5; 3; 8; 3; 0; 4
alr4566	0.444371	1	false	truth	1.16579	0.673442	0.411081	0.0935357	0.83787	1.7343	4; 7; 8; 3; 6; 3; 6; 6; 4	4; 7; 8; 3; 6; 3; 6; 6; 4	4; 7; 8; 3; 6; 3; 6; 6; 4	6	By MS/MS; By MS/MS; By MS/MS; By MS/MS; By MS/MS; By MS/MS; By MS/MS; By MS/MS; By MS/MS	16.1; 27.6; 28.1; 11.5; 21.9; 12; 25.3; 22.9; 14.3	24763; 51644; 47520; 12090; 32213; 18900; 37009; 11258; 30775	12809; 21282; 23355; 17820; 24745; 15180; 14441; 12979; 15106	9; 5; 8; 6; 3; 1; 9; 7; 5	4; 3; 3; 3; 3; 6; 4; 3; 2	4; 3; 3; 3; 3; 6; 4; 3; 2	4; 3; 3; 3; 3; 6; 4; 3; 2	3	By MS/MS; By MS/MS; By MS/MS; By MS/MS; By MS/MS; By MS/MS; By MS/MS; By matching; By MS/MS	16.7; 13.8; 10.4; 12; 11.5; 20.6; 12; 12; 6.8	10680; 17953; 5934; 16744; 43847; 86804; 21932; 11445; 9918.3	11069; 12057; 0; 8498.2; 23128; 29554; 15331; 8160.6; 17066	1; 1; 1; 4; 1; 4; 1; 0; 2
alr4582	0.358653	1	false	truth	1.1625	0.300499	#N/A	#N/A	#N/A	#N/A	4; 2; 3; 2; 0; 3; 2; 2; 3	4; 2; 3; 2; 0; 3; 2; 2; 3	4; 2; 3; 2; 0; 3; 2; 2; 3	2	By MS/MS; By MS/MS; By MS/MS; By MS/MS; By matching; By MS/MS; By MS/MS; By MS/MS; By MS/MS	31.4; 15.1; 20.3; 14; 0; 19.2; 15.1; 14; 21.5	9467.6; 6088.7; 14889; 0; 0; 31301; 3270.8; 17102; 36127	11997; 0; 9926.6; 0; 0; 9830.5; 0; 0; 18188	4; 2; 1; 2; 0; 0; 1; 2; 2	0; 1; 1; 2; 3; 2; 3; 2; 3	0; 1; 1; 2; 3; 2; 3; 2; 3	0; 1; 1; 2; 3; 2; 3; 2; 3	2	By matching; By matching; By matching; By MS/MS; By matching; By MS/MS; By MS/MS; By matching; By MS/MS	0; 5.2; 5.2; 15.1; 21.5; 15.1; 20.3; 12.8; 20.3	0; 2908.6; 3295.3; 11723; 23586; 13152; 10023; 13828; 9735.8	0; 0; 0; 0; 10200; 0; 0; 0; 0	0; 0; 0; 1; 0; 1; 2; 0; 1
alr4596	0.250775	1	false	truth	1.2698	0.691352	0.449214	0.0715336	0.891281	1.84398	4; 3; 5; 6; 5; 4; 5; 5; 7	4; 3; 5; 6; 5; 4; 5; 5; 7	4; 3; 5; 6; 5; 4; 5; 5; 7	5	By MS/MS; By MS/MS; By MS/MS; By MS/MS; By MS/MS; By MS/MS; By MS/MS; By MS/MS; By MS/MS	17.1; 12.3; 17.7; 25.5; 22; 15.6; 20.5; 20.5; 32	9672.2; 5897.6; 7190.8; 39436; 10783; 28202; 32890; 25054; 13334	13171; 0; 12390; 10244; 7632.8; 20672; 17919; 23370; 22282	3; 1; 2; 3; 3; 1; 4; 5; 10	2; 4; 4; 6; 3; 6; 4; 1; 5	2; 4; 4; 6; 3; 6; 4; 1; 5	2; 4; 4; 6; 3; 6; 4; 1; 5	4	By MS/MS; By MS/MS; By MS/MS; By MS/MS; By MS/MS; By MS/MS; By MS/MS; By matching; By MS/MS	6.3; 14.9; 17.9; 27.9; 10.2; 24.6; 19; 2.4; 17.9	2665.3; 7557.3; 8613.3; 48446; 36533; 17662; 8510; 1177.1; 9763.1	0; 7277.8; 12685; 12697; 20846; 16468; 15824; 0; 8184.4	1; 3; 3; 3; 2; 5; 2; 0; 4
alr4642	0.0627978	1	false	truth	0	#N/A	#N/A	#N/A	#N/A	#N/A	1; 1; 0; 1; 0; 1; 0; 0; 1	1; 1; 0; 1; 0; 1; 0; 0; 1	1; 1; 0; 1; 0; 1; 0; 0; 1	1	By matching; By matching; By matching; By MS/MS; By matching; By matching; By matching; By matching; By matching	9.4; 9.4; 0; 10.8; 0; 5.6; 0; 0; 5.6	2664.8; 1949.7; 0; 6911.8; 0; 9533; 0; 0; 9322.1	0; 0; 0; 0; 0; 0; 0; 0; 0	0; 0; 0; 1; 0; 0; 0; 0; 0	2; 2; 0; 2; 0; 1; 3; 3; 1	2; 2; 0; 2; 0; 1; 3; 3; 1	2; 2; 0; 2; 0; 1; 3; 3; 1	2	By matching; By MS/MS; By matching; By MS/MS; By matching; By MS/MS; By MS/MS; By MS/MS; By MS/MS	15; 16.4; 0; 20.2; 0; 5.6; 25.8; 25.8; 5.6	15614; 9667.2; 0; 1728; 0; 24340; 37893; 19751; 17185	0; 7301; 0; 0; 0; 0; 25922; 17801; 0	0; 2; 0; 1; 0; 1; 2; 2; 1
alr4745	0.839554	1	false	truth	0.96057	0.564545	0.330915	0.00659757	0.634876	1.29902	4; 4; 5; 4; 6; 5; 4; 5; 4	4; 4; 5; 4; 6; 5; 4; 5; 4	4; 4; 5; 4; 6; 5; 4; 5; 4	4	By MS/MS; By MS/MS; By MS/MS; By MS/MS; By MS/MS; By MS/MS; By MS/MS; By MS/MS; By MS/MS	13.3; 15.4; 18.3; 15.6; 22.7; 20.2; 13.1; 16.2; 15.2	13592; 27335; 70682; 35098; 52976; 54470; 27540; 37277; 24513	15649; 21363; 51293; 23282; 23757; 19231; 30120; 17836; 7897.2	3; 2; 4; 5; 4; 0; 6; 5; 1	3; 3; 4; 4; 7; 4; 5; 3; 5	3; 3; 4; 4; 7; 4; 5; 3; 5	3; 3; 4; 4; 7; 4; 5; 3; 5	4	By MS/MS; By MS/MS; By MS/MS; By MS/MS; By MS/MS; By MS/MS; By MS/MS; By MS/MS; By MS/MS	10.5; 12.6; 15.6; 9.1; 21.1; 13.7; 18.5; 12.2; 13.9	19630; 16528; 41492; 50684; 68687; 60529; 63393; 31428; 68256	22575; 0; 29596; 31362; 22734; 26868; 28001; 21655; 25375	1; 2; 3; 5; 3; 8; 3; 1; 2
alr4784	0.0762524	1	false	truth	0.61043	0.398477	0.270919	0.0858789	0.378673	0.956882	4; 5; 3; 5; 2; 3; 7; 5; 5	4; 5; 3; 5; 2; 3; 7; 5; 5	4; 5; 3; 5; 2; 3; 7; 5; 5	5	By MS/MS; By MS/MS; By MS/MS; By MS/MS; By MS/MS; By MS/MS; By MS/MS; By MS/MS; By MS/MS	14.8; 17.4; 11; 18.6; 7.9; 13.1; 25.5; 19.1; 19.1	13114; 31382; 21378; 34164; 17610; 12064; 29348; 15764; 14991	0; 27448; 19312; 17129; 0; 0; 19153; 8271.8; 6277.2	4; 3; 1; 3; 1; 2; 3; 2; 3	6; 3; 5; 6; 5; 8; 6; 4; 7	6; 3; 5; 6; 5; 8; 6; 4; 7	6; 3; 5; 6; 5; 8; 6; 4; 7	6	By MS/MS; By MS/MS; By MS/MS; By MS/MS; By MS/MS; By MS/MS; By MS/MS; By MS/MS; By MS/MS	22.2; 10.5; 19.6; 27.2; 20; 29.6; 22.2; 15.5; 30.1	20655; 14114; 48784; 55257; 84930; 70206; 78296; 44665; 58882	11464; 0; 16543; 11759; 40668; 35314; 33727; 36194; 28893	2; 1; 3; 2; 2; 6; 4; 1; 5
alr4785	0.337063	1	false	truth	1.15882	0.507593	0.30388	0.0395179	0.892784	1.52021	4; 2; 4; 5; 5; 6; 3; 3; 3	4; 2; 4; 5; 5; 6; 3; 3; 3	4; 2; 4; 5; 5; 6; 3; 3; 3	4	By MS/MS; By MS/MS; By MS/MS; By MS/MS; By MS/MS; By MS/MS; By MS/MS; By MS/MS; By MS/MS	51.5; 25.3; 51.5; 51.5; 64.6; 65.7; 39.4; 39.4; 29.3	41255; 39478; 36181; 55650; 46393; 160980; 19440; 45947; 57995	30280; 38508; 23055; 36194; 22130; 30854; 0; 45115; 20049	7; 2; 5; 7; 1; 2; 3; 5; 1	5; 2; 4; 4; 4; 4; 3; 3; 3	5; 2; 4; 4; 4; 4; 3; 3; 3	5; 2; 4; 4; 4; 4; 3; 3; 3	4	By MS/MS; By MS/MS; By MS/MS; By MS/MS; By MS/MS; By MS/MS; By MS/MS; By matching; By matching	51.5; 25.3; 55.6; 41.4; 51.5; 41.4; 41.4; 35.4; 40.4	40619; 21417; 52434; 93570; 83044; 57872; 32868; 29268; 9632.9	29793; 27419; 27784; 44164; 37377; 20402; 37726; 22051; 8955.3	2; 1; 2; 4; 3; 2; 1; 0; 0
alr4787	0.110548	1	false	truth	0.744446	0.606401	0.788272	0.0657509	0	1.61406	1; 1; 4; 3; 3; 0; 1; 1; 1	1; 1; 4; 3; 3; 0; 1; 1; 1	1; 1; 4; 3; 3; 0; 1; 1; 1	1	By MS/MS; By matching; By MS/MS; By MS/MS; By MS/MS; By matching; By MS/MS; By matching; By MS/MS	2.9; 2.9; 12.5; 9.4; 9.4; 0; 3.5; 2.9; 3.5	0; 9177.2; 18310; 12861; 12190; 0; 2357.6; 10197; 3076.3	0; 0; 7943.4; 2692.7; 0; 0; 0; 0; 0	1; 0; 1; 1; 2; 0; 2; 0; 2	2; 2; 2; 0; 2; 3; 3; 2; 2	2; 2; 2; 0; 2; 3; 3; 2; 2	2; 2; 2; 0; 2; 3; 3; 2; 2	2	By matching; By MS/MS; By MS/MS; By matching; By MS/MS; By MS/MS; By MS/MS; By matching; By MS/MS	5.9; 6.5; 6.5; 0; 6.5; 9.6; 9.4; 5.9; 6.5	5212.4; 6531.6; 12634; 0; 7948.6; 4843.3; 10658; 23771; 12424	5139.7; 6583.1; 4551.6; 0; 6834.2; 0; 0; 11197; 10013	0; 2; 1; 0; 2; 3; 3; 0; 3
alr4798	0.111408	1	false	truth	1.35102	0.70746	0.411714	0.0466431	0.990303	1.84393	7; 7; 8; 8; 6; 4; 7; 6; 8	7; 7; 8; 8; 6; 4; 7; 6; 8	7; 7; 8; 8; 6; 4; 7; 6; 8	7	By MS/MS; By MS/MS; By MS/MS; By MS/MS; By MS/MS; By MS/MS; By MS/MS; By MS/MS; By MS/MS	27.5; 26.8; 34.2; 33.5; 23.5; 13.8; 24.2; 21.2; 34.8	63187; 32670; 60837; 53126; 47097; 55437; 67563; 35520; 64231	47899; 17239; 49650; 18029; 37131; 32727; 45503; 25714; 45217	5; 6; 7; 7; 4; 2; 6; 2; 6	5; 5; 7; 7; 8; 9; 7; 8; 5	5; 5; 7; 7; 8; 9; 7; 8; 5	5; 5; 7; 7; 8; 9; 7; 8; 5	7	By MS/MS; By MS/MS; By MS/MS; By MS/MS; By MS/MS; By MS/MS; By MS/MS; By MS/MS; By MS/MS	21; 19.2; 24.8; 27; 34.8; 38.2; 26.8; 30.8; 17.8	29991; 13368; 50797; 143640; 52749; 25973; 65312; 111040; 40720	21906; 30529; 30572; 59241; 21728; 10814; 27503; 17155; 33012	3; 3; 4; 9; 6; 6; 3; 2; 3
alr4806	0.0287751	1	false	truth	0.594373	0.319338	0.21512	0.0552649	0.405106	0.853179	6; 8; 3; 6; 3; 3; 4; 6; 8	6; 8; 3; 6; 3; 3; 4; 6; 8	6; 8; 3; 6; 3; 3; 4; 6; 8	6	By MS/MS; By MS/MS; By MS/MS; By MS/MS; By MS/MS; By matching; By MS/MS; By MS/MS; By MS/MS	25.1; 31.1; 12.4; 25.8; 13.6; 8.7; 15.7; 23.2; 28.3	8387.4; 52522; 7581.1; 33220; 11420; 23980; 9350.4; 20331; 51771	6994.2; 33177; 21669; 25014; 14704; 0; 0; 13105; 19948	2; 2; 2; 4; 2; 0; 2; 2; 4	2; 5; 7; 3; 5; 6; 5; 6; 5	2; 5; 7; 3; 5; 6; 5; 6; 5	2; 5; 7; 3; 5; 6; 5; 6; 5	5	By MS/MS; By MS/MS; By MS/MS; By MS/MS; By MS/MS; By MS/MS; By MS/MS; By MS/MS; By MS/MS	7.3; 22.2; 30.4; 12.6; 22.7; 23.7; 17.6; 22.2; 18.3	11845; 19166; 24018; 58856; 71717; 21197; 55391; 81970; 51420	0; 24761; 20082; 41769; 36691; 0; 23402; 46264; 44345	1; 3; 5; 3; 2; 5; 4; 0; 2
alr4831	0.681238	1	false	truth	0.906299	0.540381	0.837342	0.591903	0.364459	4.07712	1; 1; 5; 2; 3; 2; 3; 1; 3	1; 1; 5; 2; 3; 2; 3; 1; 3	1; 1; 5; 2; 3; 2; 3; 1; 3	2	By MS/MS; By matching; By MS/MS; By MS/MS; By MS/MS; By MS/MS; By MS/MS; By MS/MS; By MS/MS	5.8; 2.9; 24.1; 9.6; 15.8; 10; 15.1; 4.8; 15.1	0; 2796.1; 12497; 18830; 22149; 15217; 21563; 0; 17714	0; 0; 6160.2; 0; 11075; 0; 17506; 0; 0	1; 0; 2; 1; 2; 1; 2; 1; 1	2; 0; 2; 0; 1; 5; 2; 0; 3	2; 0; 2; 0; 1; 5; 2; 0; 3	2; 0; 2; 0; 1; 5; 2; 0; 3	2	By MS/MS; By matching; By matching; By matching; By MS/MS; By MS/MS; By MS/MS; By matching; By MS/MS	8; 0; 7.7; 0; 4.8; 25.1; 9.3; 0; 13.8	449.43; 0; 23330; 0; 16032; 27232; 13203; 0; 19030	0; 0; 0; 0; 0; 9382; 0; 0; 15367	1; 0; 0; 0; 1; 4; 2; 0; 2
alr4839	0.846876	1	false	truth	1.03848	0.469007	0.37444	0.114034	0.752486	1.59181	0; 2; 3; 3; 2; 1; 1; 2; 3	0; 2; 3; 3; 2; 1; 1; 2; 3	0; 2; 3; 3; 2; 1; 1; 2; 3	2	By matching; By MS/MS; By MS/MS; By MS/MS; By MS/MS; By matching; By MS/MS; By MS/MS; By MS/MS	0; 17.2; 24.2; 24.2; 14.6; 7.6; 7.6; 14.6; 24.2	0; 0; 4545.3; 13303; 13334; 4595.5; 25058; 26896; 5337.2	0; 0; 0; 15715; 16387; 0; 0; 19131; 0	0; 2; 1; 4; 1; 0; 1; 2; 2	3; 3; 2; 3; 2; 3; 1; 2; 3	3; 3; 2; 3; 2; 3; 1; 2; 3	3; 3; 2; 3; 2; 3; 1; 2; 3	3	By MS/MS; By MS/MS; By MS/MS; By MS/MS; By MS/MS; By MS/MS; By MS/MS; By matching; By MS/MS	22.3; 24.2; 14.6; 24.2; 14.6; 24.2; 7.6; 17.2; 19.7	19215; 16487; 9792.9; 67739; 68840; 28298; 18864; 20821; 7503.6	10956; 18199; 0; 23163; 28780; 14386; 0; 11489; 0	2; 2; 1; 3; 1; 1; 2; 0; 4
alr4840	0.135476	1	false	truth	0.645975	0.245472	0.253213	0.125373	0.452422	1.02472	1; 0; 3; 3; 2; 0; 4; 4; 2	1; 0; 3; 3; 2; 0; 4; 4; 2	1; 0; 3; 3; 2; 0; 4; 4; 2	2	By matching; By matching; By MS/MS; By MS/MS; By MS/MS; By matching; By MS/MS; By MS/MS; By MS/MS	2.6; 0; 9; 7.9; 6; 0; 10.9; 11.3; 5.1	0; 0; 4935.1; 15065; 5734.3; 0; 12919; 3131.2; 0	0; 0; 7185.1; 10001; 0; 0; 9000.7; 0; 0	0; 0; 1; 1; 1; 0; 2; 3; 1	2; 2; 3; 3; 3; 7; 5; 1; 7	2; 2; 3; 3; 3; 7; 5; 1; 7	2; 2; 3; 3; 3; 7; 5; 1; 7	3	By matching; By MS/MS; By MS/MS; By MS/MS; By MS/MS; By MS/MS; By MS/MS; By matching; By MS/MS	7.3; 6.2; 7.2; 9.8; 6.6; 20.5; 15.4; 4.1; 18.3	7021.7; 7041.6; 10111; 4890.6; 17573; 34609; 20465; 6694.4; 17944	0; 0; 0; 0; 12446; 21401; 9227.6; 0; 12166	0; 1; 1; 1; 1; 4; 1; 0; 4
alr4851	0.900207	1	false	truth	0.979752	0.472572	0.275019	0.0201414	0.721332	1.27845	11; 10; 12; 7; 6; 10; 7; 10; 8	11; 10; 12; 7; 6; 10; 7; 10; 8	11; 10; 12; 7; 6; 10; 7; 10; 8	10	By MS/MS; By MS/MS; By MS/MS; By MS/MS; By MS/MS; By MS/MS; By MS/MS; By MS/MS; By MS/MS	16.3; 13.8; 16.1; 9.2; 8; 14.3; 10.2; 15.3; 11.1	50405; 84627; 73423; 52006; 61247; 97120; 21839; 32039; 53054	29003; 33887; 53064; 48649; 58396; 26466; 22830; 28099; 27337	13; 4; 9; 13; 3; 1; 5; 7; 7	6; 9; 8; 10; 8; 7; 10; 3; 13	6; 9; 8; 10; 8; 7; 10; 3; 13	6; 9; 8; 10; 8; 7; 10; 3; 13	8	By MS/MS; By MS/MS; By MS/MS; By MS/MS; By MS/MS; By MS/MS; By MS/MS; By MS/MS; By MS/MS	7.7; 12.5; 10.9; 14.2; 10.6; 9.9; 14.5; 4.1; 20	64572; 51733; 72917; 106340; 102500; 50232; 93293; 32338; 110150	31201; 34567; 42821; 48507; 54977; 34779; 33529; 36526; 34866	2; 7; 4; 7; 1; 5; 5; 1; 6
alr4853	0.00163997	1	false	truth	0.617769	0.135271	0.0939519	0.0107048	0.529758	0.719149	3; 3; 3; 6; 5; 4; 4; 4; 6	3; 3; 3; 6; 5; 4; 4; 4; 6	3; 3; 3; 6; 5; 4; 4; 4; 6	4	By MS/MS; By MS/MS; By MS/MS; By MS/MS; By MS/MS; By MS/MS; By MS/MS; By MS/MS; By MS/MS	13.4; 11.6; 12.6; 26.8; 23.5; 18.8; 17; 18.8; 24	27374; 16498; 15386; 48959; 45419; 57937; 18027; 52199; 56878	28605; 23945; 17467; 23861; 20152; 27606; 25236; 16492; 29370	3; 3; 4; 6; 3; 1; 4; 2; 5	2; 3; 2; 5; 5; 6; 4; 1; 4	2; 3; 2; 5; 5; 6; 4; 1; 4	2; 3; 2; 5; 5; 6; 4; 1; 4	4	By matching; By MS/MS; By MS/MS; By MS/MS; By MS/MS; By MS/MS; By MS/MS; By matching; By MS/MS	7.2; 12.4; 7.2; 19.6; 23.2; 27.6; 17.5; 3.9; 16.5	43669; 19292; 12243; 84097; 109920; 80580; 14631; 8430.6; 21781	38161; 0; 0; 48860; 37842; 39284; 0; 0; 0	0; 1; 1; 3; 2; 5; 5; 0; 1
alr4866; alr4592; alr3727; all3572; alr3742	0.00651452	1	false	truth	1.77508	0.96379	0.638127	0.109319	1.28256	2.70333	4; 3; 4; 4; 4; 6; 5; 6; 6	4; 3; 4; 4; 4; 6; 5; 6; 6	4; 3; 4; 4; 4; 6; 5; 6; 6	4	By MS/MS; By MS/MS; By MS/MS; By MS/MS; By MS/MS; By MS/MS; By MS/MS; By MS/MS; By MS/MS	14.7; 9.4; 14.7; 14.4; 14.7; 21.4; 17.8; 21.4; 21.4	100270; 15733; 73303; 40415; 84668; 38345; 154040; 135370; 137010	51667; 0; 48069; 39018; 41509; 71564; 68762; 64222; 50482	7; 3; 6; 4; 7; 3; 6; 5; 6	2; 3; 4; 4; 4; 4; 4; 4; 4	2; 3; 4; 4; 4; 4; 4; 4; 4	2; 3; 4; 4; 4; 4; 4; 4; 4	4	By MS/MS; By MS/MS; By MS/MS; By MS/MS; By MS/MS; By MS/MS; By MS/MS; By MS/MS; By MS/MS	8.3; 11.7; 14.4; 13.1; 14.7; 14.7; 14.7; 14.7; 14.7	34144; 5281.7; 11943; 17428; 67539; 57354; 64335; 57268; 70982	0; 0; 15248; 27692; 56837; 41957; 26675; 30152; 30323	2; 1; 2; 1; 2; 4; 5; 2; 5
alr4907	0.188711	1	false	truth	1.48255	0.63142	#N/A	0.515532	#N/A	#N/A	1; 1; 5; 2; 1; 2; 2; 1; 0	1; 1; 5; 2; 1; 2; 2; 1; 0	1; 1; 5; 2; 1; 2; 2; 1; 0	1	By matching; By matching; By matching; By matching; By MS/MS; By MS/MS; By MS/MS; By matching; By matching	7.8; 4.9; 23.5; 9.8; 4.9; 10.5; 11.1; 4.9; 0	7430.4; 7193; 35252; 16233; 2831.4; 26348; 15771; 5284; 0	0; 0; 18034; 0; 0; 0; 0; 0; 0	0; 0; 0; 0; 1; 2; 1; 0; 0	4; 3; 2; 5; 3; 2; 3; 1; 2	4; 3; 2; 5; 3; 2; 3; 1; 2	4; 3; 2; 5; 3; 2; 3; 1; 2	3	By MS/MS; By matching; By MS/MS; By MS/MS; By MS/MS; By matching; By MS/MS; By matching; By MS/MS	17; 15.4; 7.5; 30.7; 17.6; 10.5; 18.3; 4.9; 7.5	52512; 45181; 55856; 10067; 24215; 13258; 11171; 2547.7; 26925	17793; 9909.7; 0; 14100; 0; 0; 0; 0; 0	1; 0; 0; 3; 1; 0; 2; 0; 1
alr4958	0.0431465	1	false	truth	1.30381	0.298645	0.26433	0.0239163	1.06631	1.60521	4; 5; 3; 2; 2; 4; 1; 6; 3	4; 5; 3; 2; 2; 4; 1; 6; 3	4; 5; 3; 2; 2; 4; 1; 6; 3	3	By matching; By matching; By matching; By matching; By matching; By MS/MS; By MS/MS; By MS/MS; By MS/MS	5.2; 7.9; 4.9; 4; 3.1; 6.9; 1.6; 11.4; 5.7	23026; 21299; 28035; 10152; 6937.1; 12524; 0; 34525; 6297.5	13863; 14033; 12327; 0; 0; 0; 0; 16543; 0	0; 0; 0; 0; 0; 0; 1; 3; 1	3; 0; 3; 4; 3; 4; 4; 2; 1	3; 0; 3; 4; 3; 4; 4; 2; 1	3; 0; 3; 4; 3; 4; 4; 2; 1	3	By matching; By matching; By matching; By MS/MS; By MS/MS; By MS/MS; By MS/MS; By matching; By matching	4.7; 0; 4.4; 8.5; 4.6; 8; 6.8; 2; 2.1	7677.2; 0; 12725; 31202; 22546; 16315; 8695.3; 7123; 6604.5	10432; 0; 13039; 14641; 0; 12545; 9793.6; 0; 0	0; 0; 0; 2; 0; 2; 1; 0; 0
alr4979	0.419012	1	false	truth	1.2492	0.534109	#N/A	0.519563	#N/A	#N/A	3; 2; 2; 1; 1; 3; 2; 2; 1	3; 2; 2; 1; 1; 3; 2; 2; 1	3; 2; 2; 1; 1; 3; 2; 2; 1	2	By MS/MS; By matching; By MS/MS; By MS/MS; By MS/MS; By matching; By MS/MS; By MS/MS; By MS/MS	21.2; 13.4; 11.1; 5.5; 5.5; 17.5; 13.4; 13.4; 5.5	0; 9201.1; 11134; 9542.1; 6354; 28896; 0; 1760.2; 13959	0; 0; 0; 0; 0; 16355; 0; 0; 0	2; 0; 3; 1; 1; 0; 1; 1; 1	1; 3; 0; 3; 2; 3; 4; 2; 3	1; 3; 0; 3; 2; 3; 4; 2; 3	1; 3; 0; 3; 2; 3; 4; 2; 3	3	By MS/MS; By MS/MS; By matching; By MS/MS; By MS/MS; By MS/MS; By MS/MS; By MS/MS; By MS/MS	5.5; 21.2; 0; 21.2; 13.4; 19.4; 26.7; 13.4; 19.4	8326; 4771; 0; 24502; 0; 24897; 31395; 20910; 25357	0; 0; 0; 0; 0; 18275; 8768.4; 0; 17422	2; 1; 0; 1; 1; 3; 2; 1; 3
alr4995	0.00141587	1	false	truth	0.500087	0.226803	0.13658	0.0353893	0.378166	0.658702	5; 3; 8; 5; 5; 7; 2; 4; 4	5; 3; 8; 5; 5; 7; 2; 4; 4	5; 3; 8; 5; 5; 7; 2; 4; 4	5	By MS/MS; By MS/MS; By MS/MS; By MS/MS; By MS/MS; By MS/MS; By MS/MS; By MS/MS; By MS/MS	10; 7; 17.4; 10.5; 11.9; 16.5; 4.8; 9.5; 10.2	21232; 26224; 27912; 40123; 21948; 38460; 17539; 6288.2; 38947	11253; 14599; 15723; 26603; 14243; 11654; 15393; 0; 14235	7; 2; 7; 6; 2; 2; 2; 3; 3	5; 3; 5; 8; 6; 8; 6; 6; 2	5; 3; 5; 8; 6; 8; 6; 6; 2	5; 3; 5; 8; 6; 8; 6; 6; 2	6	By MS/MS; By MS/MS; By MS/MS; By MS/MS; By MS/MS; By MS/MS; By MS/MS; By MS/MS; By MS/MS	11.1; 5.3; 11.7; 19.2; 13.9; 18.2; 14.5; 14.2; 4.8	21547; 28617; 17793; 99422; 117190; 110030; 55497; 30730; 17663	28475; 27510; 13132; 43094; 47329; 40285; 37672; 33133; 21575	4; 4; 2; 12; 6; 9; 5; 1; 3
alr5027	0.102536	1	false	truth	0.928422	0.040002	#N/A	0.00527609	#N/A	#N/A	1; 1; 0; 2; 0; 0; 2; 2; 1	1; 1; 0; 2; 0; 0; 2; 2; 1	1; 1; 0; 2; 0; 0; 2; 2; 1	1	By MS/MS; By matching; By matching; By MS/MS; By matching; By matching; By MS/MS; By MS/MS; By MS/MS	5.5; 10.9; 0; 18.2; 0; 0; 16.4; 12.7; 5.5	5774.2; 6674.5; 0; 37382; 0; 0; 9741.3; 15652; 9319.2	0; 0; 0; 0; 0; 0; 0; 9063.5; 0	1; 0; 0; 2; 0; 0; 2; 1; 1	2; 2; 1; 2; 2; 2; 1; 1; 2	2; 2; 1; 2; 2; 2; 1; 1; 2	2; 2; 1; 2; 2; 2; 1; 1; 2	2	By MS/MS; By MS/MS; By MS/MS; By MS/MS; By MS/MS; By MS/MS; By MS/MS; By matching; By matching	16.4; 16.4; 5.5; 16.4; 18.2; 12.7; 5.5; 5.5; 12.7	5072; 10671; 6559.6; 12514; 19745; 0; 3028.4; 15673; 22693	0; 9849.3; 0; 0; 8965.6; 0; 0; 0; 9558.8	1; 3; 1; 2; 2; 2; 1; 0; 0
alr5053	0.212626	1	false	truth	0.747902	0.347676	0.282726	0.0878254	0.515255	1.12457	5; 4; 2; 5; 3; 2; 5; 4; 4	5; 4; 2; 5; 3; 2; 5; 4; 4	5; 4; 2; 5; 3; 2; 5; 4; 4	4	By MS/MS; By MS/MS; By MS/MS; By MS/MS; By matching; By matching; By MS/MS; By MS/MS; By MS/MS	12.1; 11.1; 5; 13.1; 7.9; 6.1; 12.9; 11.1; 12.1	23169; 50821; 46336; 15759; 15490; 35628; 21500; 31449; 58663	12740; 11847; 0; 0; 12125; 0; 0; 0; 19313	2; 0; 1; 2; 0; 0; 2; 2; 2	5; 2; 5; 3; 4; 4; 3; 2; 1	5; 2; 5; 3; 4; 4; 3; 2; 1	5; 2; 5; 3; 4; 4; 3; 2; 1	3	By matching; By MS/MS; By MS/MS; By MS/MS; By MS/MS; By MS/MS; By MS/MS; By MS/MS; By MS/MS	10.4; 5; 13.1; 6.3; 9.8; 9.6; 9.6; 6.3; 3.3	51271; 38925; 45537; 0; 55852; 45540; 11910; 10994; 0	21626; 0; 16611; 0; 24803; 20559; 7341.2; 18406; 0	0; 1; 1; 2; 2; 2; 1; 1; 1
alr5055	0.307176	1	false	truth	0.724724	0.352167	0.479348	0.0046738	0.247643	1.20861	3; 2; 2; 1; 0; 1; 3; 1; 3	3; 2; 2; 1; 0; 1; 3; 1; 3	3; 2; 2; 1; 0; 1; 3; 1; 3	2	By MS/MS; By MS/MS; By MS/MS; By MS/MS; By matching; By matching; By MS/MS; By matching; By MS/MS	19.1; 27; 17.6; 7.8; 0; 11.3; 31.9; 9.8; 30.4	26366; 40624; 31414; 12395; 0; 2903.7; 9192; 4673; 19421	23240; 0; 0; 0; 0; 0; 8684.3; 0; 18379	3; 2; 1; 1; 0; 0; 1; 0; 2	2; 2; 2; 1; 1; 3; 2; 2; 2	2; 2; 2; 1; 1; 3; 2; 2; 2	2; 2; 2; 1; 1; 3; 2; 2; 2	2	By MS/MS; By MS/MS; By MS/MS; By MS/MS; By matching; By MS/MS; By MS/MS; By matching; By MS/MS	17.6; 17.6; 20.6; 12.7; 7.8; 24; 17.6; 21.1; 21.1	29716; 54598; 11376; 0; 4245.6; 4398.6; 0; 15671; 11276	19146; 21475; 0; 0; 0; 0; 0; 0; 0	0; 1; 2; 2; 0; 1; 2; 0; 2
alr5059	0.141905	1	false	truth	1.28082	0.611427	0.365004	0.0506365	0.968351	1.72993	7; 7; 5; 6; 6; 9; 5; 4; 9	7; 7; 5; 6; 6; 9; 5; 4; 9	7; 7; 5; 6; 6; 9; 5; 4; 9	6	By MS/MS; By MS/MS; By MS/MS; By MS/MS; By MS/MS; By MS/MS; By MS/MS; By MS/MS; By MS/MS	32.6; 27.7; 20.1; 26.9; 24.7; 35.6; 22; 14.9; 38	43858; 42384; 38276; 72136; 68675; 62602; 69568; 6432; 102680	26243; 30688; 22375; 32811; 23220; 17172; 49124; 0; 41825	6; 4; 4; 8; 3; 1; 7; 4; 9	6; 4; 5; 5; 4; 6; 6; 4; 9	6; 4; 5; 5; 4; 6; 6; 4; 9	6; 4; 5; 5; 4; 6; 6; 4; 9	5	By MS/MS; By MS/MS; By MS/MS; By MS/MS; By MS/MS; By MS/MS; By MS/MS; By MS/MS; By MS/MS	26.1; 15.5; 19.3; 23.1; 17.4; 28.5; 25.3; 18.2; 33.7	26062; 23100; 54257; 32425; 28153; 62867; 59750; 44851; 37027	18859; 36140; 22506; 17529; 33031; 16172; 24826; 27655; 15854	6; 4; 1; 2; 1; 2; 4; 1; 3
alr5084	0.906809	1	false	truth	1.03921	0.655726	0.588135	0.047786	0.486402	1.69633	2; 1; 4; 2; 0; 1; 1; 4; 4	2; 1; 4; 2; 0; 0; 1; 4; 4	2; 1; 4; 2; 0; 0; 1; 4; 4	2	By matching; By matching; By MS/MS; By MS/MS; By matching; By matching; By matching; By MS/MS; By MS/MS	4.3; 1.7; 8; 4.6; 0; 1.6; 1.8; 7.4; 9	17459; 4388.2; 19621; 27289; 0; 0; 2961.2; 23554; 10484	0; 0; 30714; 19632; 0; 0; 0; 15155; 8262.4	0; 0; 1; 1; 0; 0; 0; 4; 4	1; 5; 3; 5; 8; 5; 5; 2; 6	1; 4; 3; 5; 8; 5; 5; 2; 6	1; 4; 3; 5; 8; 5; 5; 2; 6	5	By matching; By matching; By matching; By MS/MS; By MS/MS; By MS/MS; By MS/MS; By matching; By MS/MS	1.8; 8.9; 5; 10.4; 16.8; 9.7; 9.9; 4.4; 10.1	9351.7; 21570; 21982; 62751; 51751; 64971; 62261; 9301.9; 18293	0; 22595; 0; 26117; 24211; 17994; 18468; 0; 11266	0; 0; 0; 2; 6; 4; 3; 0; 4
alr5103	0.837625	1	false	truth	1.05368	0.726673	0.467956	0.11097	0.671771	1.69864	3; 6; 5; 7; 2; 4; 3; 2; 6	3; 6; 5; 7; 2; 4; 3; 2; 6	3; 6; 5; 7; 2; 4; 3; 2; 6	4	By MS/MS; By matching; By MS/MS; By MS/MS; By matching; By MS/MS; By MS/MS; By MS/MS; By MS/MS	11.7; 13.1; 10; 20.9; 5.8; 13.1; 11.2; 6.6; 17.5	21577; 39227; 44722; 80047; 31979; 116260; 33829; 19267; 21910	0; 14022; 40134; 34517; 0; 26857; 25411; 22668; 14244	3; 0; 7; 1; 0; 0; 1; 1; 4	2; 5; 5; 7; 3; 5; 6; 5; 6	2; 5; 5; 7; 3; 5; 6; 5; 6	2; 5; 5; 7; 3; 5; 6; 5; 6	5	By matching; By MS/MS; By MS/MS; By MS/MS; By matching; By MS/MS; By MS/MS; By MS/MS; By MS/MS	5.6; 15.1; 15.3; 19.5; 8; 14.6; 15.8; 14.8; 16.8	29904; 18801; 79381; 50811; 28923; 62034; 47758; 80472; 52520	0; 8928.7; 48682; 26599; 32878; 20451; 20130; 27954; 18678	0; 1; 3; 4; 0; 3; 4; 1; 3
alr5154	0.678943	1	false	false	0.746783	0.814855	0.901361	0.992923	0.200362	210.844	1; 1; 2; 1; 0; 1; 3; 3; 4	1; 1; 2; 1; 0; 1; 3; 3; 4	1; 1; 2; 1; 0; 1; 3; 3; 4	1	By MS/MS; By matching; By matching; By matching; By matching; By MS/MS; By MS/MS; By matching; By MS/MS	1.9; 1.9; 3.2; 1.2; 0; 1.9; 3.9; 3.5; 4.7	4052.3; 9420.7; 7911.3; 40.87; 0; 512700; 7563.6; 1838.1; 5036.8	0; 0; 61657; 0; 0; 197360; 70771; 0; 84297	1; 0; 0; 0; 0; 4; 1; 0; 3	0; 2; 3; 1; 1; 1; 3; 1; 3	0; 2; 3; 1; 1; 1; 3; 1; 3	0; 2; 3; 1; 1; 1; 3; 1; 3	1	By matching; By matching; By MS/MS; By MS/MS; By matching; By matching; By matching; By matching; By MS/MS	0; 2.5; 4.3; 1.3; 1.2; 1.2; 3.3; 1.6; 3.9	0; 4239.5; 470700; 1138.7; 445.09; 5590.2; 9168.3; 5195.3; 10356	0; 0; 272120; 0; 0; 0; 87154; 0; 66121	0; 0; 5; 0; 0; 0; 0; 0; 1
alr5155	0.684413	1	false	truth	0.731883	1.26007	0.932365	0.990575	0.134668	155.174	4; 3; 4; 2; 2; 3; 0; 2; 2	4; 3; 4; 2; 2; 3; 0; 2; 2	2; 2; 3; 2; 2; 3; 0; 2; 1	2	By MS/MS; By MS/MS; By MS/MS; By MS/MS; By matching; By MS/MS; By matching; By MS/MS; By MS/MS	6.9; 4; 5.7; 3.4; 2.8; 4.6; 0; 3.5; 4.2	47081; 29306; 170140; 0; 6642.1; 231310; 0; 682.86; 12043	46665; 5613.3; 138110; 0; 15102; 100530; 0; 0; 10989	1; 1; 5; 2; 0; 2; 0; 1; 1	3; 2; 4; 0; 1; 4; 2; 3; 2	3; 2; 4; 0; 1; 4; 2; 3; 2	2; 2; 3; 0; 1; 3; 2; 3; 2	2	By MS/MS; By MS/MS; By MS/MS; By matching; By matching; By MS/MS; By MS/MS; By MS/MS; By MS/MS	5.4; 3; 5.7; 0; 1.2; 5.7; 3.4; 4.6; 3.4	44974; 225160; 229170; 0; 6294.4; 8310.8; 6207.9; 2746.8; 497320	37137; 50016; 56663; 0; 0; 16466; 0; 9876.4; 264700	2; 4; 3; 0; 0; 1; 3; 1; 8
alr5168	0.71401	1	false	truth	0.939018	0.411284	0.288341	0.0149189	0.662375	1.2441	4; 2; 4; 3; 4; 1; 2; 2; 3	4; 2; 4; 3; 4; 1; 2; 2; 3	4; 2; 4; 3; 4; 1; 2; 2; 3	3	By MS/MS; By MS/MS; By MS/MS; By MS/MS; By MS/MS; By matching; By MS/MS; By matching; By MS/MS	16.3; 11.6; 16.3; 11.9; 16.3; 7.2; 11.6; 11.6; 11	21510; 13335; 14202; 6597.4; 18476; 2188.5; 5177.3; 9814.1; 12152	9263.6; 8729.7; 11695; 4743.9; 10253; 0; 0; 4050; 14173	2; 0; 3; 4; 2; 0; 1; 0; 4	3; 4; 1; 2; 4; 4; 3; 0; 3	3; 4; 1; 2; 4; 4; 3; 0; 3	3; 4; 1; 2; 4; 4; 3; 0; 3	3	By MS/MS; By MS/MS; By matching; By MS/MS; By MS/MS; By MS/MS; By MS/MS; By matching; By MS/MS	12.2; 16.9; 7.2; 11.9; 15.4; 15.4; 11.6; 0; 15.4	19091; 31858; 2079.5; 23174; 25484; 25354; 8104.7; 0; 13539	8348; 7921.6; 0; 0; 10953; 11690; 0; 0; 7734.2	2; 2; 0; 2; 2; 2; 2; 0; 1
alr5249	0.973679	1	false	truth	1.019	1.33763	1.03286	0.374003	0.187392	3.06822	1; 1; 2; 1; 2; 1; 1; 2; 2	1; 1; 2; 1; 2; 1; 1; 2; 2	1; 1; 2; 1; 2; 1; 1; 2; 2	1	By MS/MS; By matching; By MS/MS; By MS/MS; By matching; By matching; By matching; By matching; By MS/MS	1.8; 1.8; 3.2; 1.8; 3.2; 1.8; 1.8; 4; 3.2	2490800; 2696700; 2638900; 546880; 20490; 679540; 10558; 21216; 808970	0; 292670; 1131600; 0; 60675; 230880; 0; 36014; 1037100	1; 0; 6; 2; 0; 0; 0; 0; 2	1; 2; 1; 1; 2; 1; 2; 2; 2	1; 2; 1; 1; 2; 1; 2; 2; 2	1; 2; 1; 1; 2; 1; 2; 2; 2	2	By matching; By MS/MS; By matching; By matching; By matching; By MS/MS; By MS/MS; By matching; By matching	1.8; 3.2; 1.8; 1.8; 3.2; 1.8; 3.8; 3.2; 3.8	1470300; 1592200; 1292600; 1373300; 1746800; 1246300; 963930; 14426; 22563	0; 908580; 395980; 0; 242060; 0; 779090; 0; 58206	0; 3; 0; 0; 0; 1; 1; 0; 0
alr5279	0.0604502	1	false	false	1.75975	0.892629	0.86727	0.166255	1.0981	3.12322	1; 2; 1; 2; 1; 1; 3; 2; 0	1; 2; 1; 2; 1; 1; 3; 2; 0	1; 2; 1; 2; 1; 1; 3; 2; 0	1	By MS/MS; By MS/MS; By matching; By MS/MS; By matching; By matching; By MS/MS; By matching; By matching	6.1; 9.9; 6.1; 12.8; 6.1; 6.1; 16.6; 9.9; 0	96584; 107160; 90749; 200230; 34752; 122600; 210630; 94375; 0	0; 58911; 0; 76347; 0; 0; 56441; 38514; 0	1; 3; 0; 2; 0; 0; 2; 0; 0	1; 1; 1; 1; 2; 2; 2; 2; 1	1; 1; 1; 1; 2; 2; 2; 2; 1	1; 1; 1; 1; 2; 2; 2; 2; 1	1	By MS/MS; By MS/MS; By matching; By matching; By matching; By MS/MS; By matching; By matching; By matching	6.1; 6.1; 6.1; 6.1; 12.8; 9.9; 9.9; 12.8; 6.1	75073; 18979; 75130; 136660; 110800; 81146; 40388; 5396.7; 33705	0; 0; 0; 0; 36930; 47022; 35401; 14087; 0	1; 1; 0; 0; 0; 1; 0; 0; 0
alr5285	0.700299	1	false	false	1.12632	0.554715	#N/A	0.689372	#N/A	#N/A	1; 0; 2; 2; 1; 1; 1; 1; 0	1; 0; 2; 2; 1; 1; 1; 1; 0	1; 0; 2; 2; 1; 1; 1; 1; 0	1	By MS/MS; By matching; By MS/MS; By MS/MS; By matching; By matching; By MS/MS; By matching; By matching	5.2; 0; 16; 12; 6.4; 6.4; 6.7; 6.7; 0	0; 0; 21726; 5165.6; 6405.1; 38535; 4426.2; 426.3; 0	0; 0; 18594; 0; 0; 0; 0; 0; 0	1; 0; 1; 2; 0; 0; 1; 0; 0	0; 1; 1; 2; 2; 1; 3; 2; 1	0; 1; 1; 2; 2; 1; 3; 2; 1	0; 1; 1; 2; 2; 1; 3; 2; 1	1	By matching; By MS/MS; By MS/MS; By MS/MS; By MS/MS; By MS/MS; By MS/MS; By MS/MS; By MS/MS	0; 10.7; 10.7; 11.3; 15.3; 6.7; 23.9; 17.5; 8.6	0; 4651.3; 31258; 5979.6; 3948.4; 3322.3; 205110; 95919; 0	0; 0; 0; 11934; 0; 0; 30805; 21980; 0	0; 1; 2; 0; 3; 3; 2; 1; 1
alr5297	0.00967332	1	false	truth	2.7835	1.23473	0.985111	0.0355519	1.87777	3.89444	2; 3; 1; 3; 3; 3; 2; 2; 3	2; 3; 1; 3; 3; 3; 2; 2; 3	2; 3; 1; 3; 3; 3; 2; 2; 3	3	By MS/MS; By matching; By matching; By MS/MS; By MS/MS; By MS/MS; By MS/MS; By MS/MS; By MS/MS	18.5; 26.9; 10; 26.9; 26.9; 26.9; 18.5; 18.5; 26.9	42053; 52946; 23050; 113240; 110330; 122890; 109280; 49890; 73036	42328; 29904; 0; 75945; 63765; 55441; 0; 0; 33434	1; 0; 0; 4; 2; 2; 4; 2; 1	2; 2; 1; 1; 3; 1; 3; 2; 2	2; 2; 1; 1; 3; 1; 3; 2; 2	2; 2; 1; 1; 3; 1; 3; 2; 2	2	By MS/MS; By MS/MS; By MS/MS; By MS/MS; By matching; By MS/MS; By MS/MS; By MS/MS; By MS/MS	18.5; 18.5; 8.5; 10; 26.9; 10; 26.9; 18.5; 18.5	45602; 5995.4; 19341; 143440; 130790; 0; 51444; 49357; 2323.9	18298; 0; 0; 0; 14341; 0; 17849; 23525; 0	1; 1; 2; 2; 0; 1; 2; 1; 1
alr5299	0.354761	1	false	truth	1.47812	1.42048	0.897344	0.0520348	0.634046	2.48446	2; 3; 7; 2; 5; 7; 6; 2; 3	2; 3; 7; 2; 5; 7; 6; 2; 3	2; 3; 7; 2; 5; 7; 6; 2; 3	3	By matching; By matching; By MS/MS; By MS/MS; By MS/MS; By MS/MS; By MS/MS; By matching; By MS/MS	11.9; 15.7; 37.1; 12.4; 28.6; 39; 38.6; 11.9; 16.2	21224; 26430; 41375; 11318; 61600; 104670; 78751; 89926; 87580	88264; 83994; 47432; 0; 43882; 40408; 39441; 268640; 92770	0; 0; 5; 4; 2; 1; 4; 0; 4	3; 5; 5; 1; 1; 5; 6; 6; 4	3; 5; 5; 1; 1; 5; 6; 6; 4	3; 5; 5; 1; 1; 5; 6; 6; 4	5	By MS/MS; By MS/MS; By MS/MS; By matching; By matching; By MS/MS; By MS/MS; By MS/MS; By MS/MS	18.1; 29; 26.7; 6.2; 6.2; 26.2; 24.8; 30.5; 21	12471; 99768; 28326; 14352; 6117.9; 143560; 92350; 111500; 42224	21701; 45252; 57849; 0; 0; 81199; 66999; 93567; 65093	2; 4; 2; 0; 0; 3; 6; 1; 3
alr5300	0.128705	1	false	truth	3.46426	3.9266	2.75174	0.0981354	0.919208	6.76322	4; 4; 4; 4; 2; 3; 3; 3; 3	4; 4; 4; 4; 2; 3; 3; 3; 3	4; 4; 4; 4; 2; 3; 3; 3; 3	3	By MS/MS; By MS/MS; By MS/MS; By MS/MS; By MS/MS; By MS/MS; By MS/MS; By MS/MS; By MS/MS	35.5; 35.5; 35.5; 35.5; 12.1; 28.4; 22; 22; 28.4	28301; 29044; 33482; 63602; 57910; 13622; 42119; 28245; 26891	18521; 6835.3; 14672; 99209; 29821; 0; 51942; 2431.4; 0	3; 0; 2; 4; 0; 0; 2; 0; 1	3; 3; 4; 3; 3; 4; 4; 2; 4	3; 3; 4; 3; 3; 4; 4; 2; 4	3; 3; 4; 3; 3; 4; 4; 2; 4	3	By MS/MS; By MS/MS; By MS/MS; By MS/MS; By MS/MS; By MS/MS; By MS/MS; By MS/MS; By MS/MS	30.5; 22; 35.5; 25.5; 25.5; 35.5; 35.5; 14.9; 35.5	33606; 18304; 9483.5; 61875; 38846; 26580; 25467; 1561.8; 9037.7	0; 12665; 5792.5; 17747; 6453.5; 0; 0; 0; 6187.5	1; 1; 1; 0; 0; 1; 2; 0; 0
alr5301	0.323354	1	false	truth	1.12802	0.406452	0.236539	0.0293655	0.91964	1.40465	7; 7; 8; 7; 5; 6; 6; 6; 7	7; 7; 8; 7; 5; 6; 6; 6; 7	7; 7; 8; 7; 5; 6; 6; 6; 7	7	By MS/MS; By MS/MS; By MS/MS; By MS/MS; By MS/MS; By MS/MS; By MS/MS; By MS/MS; By MS/MS	40.8; 38.2; 46.2; 40.8; 29.8; 32.4; 34; 31.1; 40.8	89936; 69985; 139070; 228720; 179030; 132430; 139620; 81245; 117820	114080; 154850; 113380; 94594; 102890; 69828; 87002; 108930; 95795	14; 8; 11; 15; 8; 4; 11; 8; 11	5; 8; 6; 6; 6; 6; 8; 6; 7	5; 8; 6; 6; 6; 6; 8; 6; 7	5; 8; 6; 6; 6; 6; 8; 6; 7	6	By MS/MS; By MS/MS; By MS/MS; By MS/MS; By MS/MS; By MS/MS; By MS/MS; By MS/MS; By MS/MS	25.6; 46.2; 36.6; 36.6; 35.3; 35.3; 43.7; 34; 39.5	63951; 58937; 97047; 196570; 306700; 149710; 160960; 82282; 115230	112500; 73645; 72482; 128370; 127330; 132390; 83055; 79328; 60076	6; 10; 9; 8; 3; 9; 11; 4; 7
alr5302	0.43872	1	false	truth	1.23719	0.679547	0.5444	0.0456556	0.735971	1.85678	3; 5; 4; 4; 3; 3; 3; 3; 3	3; 5; 4; 4; 3; 3; 3; 3; 3	3; 5; 4; 4; 3; 3; 3; 3; 3	3	By MS/MS; By MS/MS; By MS/MS; By MS/MS; By MS/MS; By MS/MS; By MS/MS; By MS/MS; By MS/MS	21.5; 33.7; 26.5; 27.1; 24.3; 22.1; 22.1; 24.3; 22.1	61327; 14059; 90213; 94652; 0; 95102; 157720; 0; 151500	0; 0; 59169; 100180; 0; 16220; 111160; 0; 99974	1; 2; 6; 3; 3; 1; 4; 3; 4	5; 4; 2; 3; 3; 4; 4; 3; 4	5; 4; 2; 3; 3; 4; 4; 3; 4	5; 4; 2; 3; 3; 4; 4; 3; 4	4	By MS/MS; By MS/MS; By MS/MS; By MS/MS; By MS/MS; By MS/MS; By MS/MS; By MS/MS; By MS/MS	34.3; 29.3; 14.9; 24.3; 22.1; 29.3; 27.1; 22.1; 28.7	76760; 61944; 33899; 107370; 166150; 155500; 142740; 133120; 99672	39604; 37882; 0; 0; 77434; 87866; 74009; 60915; 0	2; 1; 2; 3; 2; 4; 4; 2; 1
alr5303	0.378709	1	false	truth	1.19873	0.636984	0.433964	0.085133	0.843064	1.7775	2; 2; 2; 1; 1; 2; 1; 1; 1	2; 2; 2; 1; 1; 2; 1; 1; 1	2; 2; 2; 1; 1; 2; 1; 1; 1	1	By MS/MS; By MS/MS; By MS/MS; By MS/MS; By MS/MS; By MS/MS; By MS/MS; By MS/MS; By MS/MS	18.5; 18.5; 18.5; 9.2; 9.2; 18.5; 9.2; 9.2; 9.2	450260; 429920; 469360; 694880; 1368600; 572430; 330910; 313870; 314820	293470; 202680; 338340; 391610; 0; 325230; 0; 0; 0	12; 13; 13; 11; 6; 5; 7; 6; 6	2; 2; 2; 1; 1; 2; 2; 2; 2	2; 2; 2; 1; 1; 2; 2; 2; 2	2; 2; 2; 1; 1; 2; 2; 2; 2	2	By MS/MS; By MS/MS; By MS/MS; By MS/MS; By MS/MS; By MS/MS; By MS/MS; By MS/MS; By MS/MS	18.5; 18.5; 18.5; 9.2; 9.2; 18.5; 18.5; 18.5; 18.5	328220; 337500; 532340; 631520; 584220; 445690; 364790; 372420; 484830	211170; 287930; 435380; 0; 295620; 116500; 150900; 207460; 354880	9; 13; 7; 7; 4; 8; 9; 5; 11
alr7074	0.845938	1	false	truth	0.96028	0.594703	0.346094	0.0377056	0.643097	1.35272	5; 6; 4; 5; 5; 5; 7; 6; 6	5; 6; 4; 5; 5; 5; 7; 6; 6	5; 6; 4; 5; 5; 5; 7; 6; 6	5	By MS/MS; By MS/MS; By MS/MS; By MS/MS; By MS/MS; By MS/MS; By MS/MS; By MS/MS; By MS/MS	50; 55.5; 50; 70.3; 67.2; 50; 75.8; 70.3; 70.3	594770; 537460; 847660; 257520; 317030; 584200; 450280; 266640; 524220	243040; 356260; 642390; 117730; 185350; 280510; 351020; 270700; 386850	14; 12; 18; 18; 5; 7; 19; 14; 19	4; 2; 4; 6; 7; 7; 5; 4; 5	4; 2; 4; 6; 7; 7; 5; 4; 5	4; 2; 4; 6; 7; 7; 5; 4; 5	5	By MS/MS; By MS/MS; By MS/MS; By MS/MS; By MS/MS; By MS/MS; By MS/MS; By MS/MS; By MS/MS	33.6; 17.2; 53.9; 70.3; 75.8; 75.8; 46.9; 33.6; 50	249550; 398840; 587420; 271640; 291270; 645590; 580250; 590950; 1331700	253080; 415730; 364580; 171590; 218380; 323070; 423320; 426020; 433480	6; 6; 9; 11; 10; 14; 8; 4; 10
alr7075	0.398341	1	false	truth	1.28568	1.13599	0.661105	0.163432	0.771652	2.30205	4; 4; 6; 4; 4; 6; 6; 5; 6	4; 4; 6; 4; 4; 6; 6; 5; 6	4; 4; 6; 4; 4; 6; 6; 5; 6	5	By MS/MS; By MS/MS; By MS/MS; By MS/MS; By MS/MS; By MS/MS; By MS/MS; By MS/MS; By MS/MS	38.7; 38.7; 48.2; 39.4; 38; 52.6; 48.2; 39.4; 53.3	191980; 266060; 224040; 18428; 124850; 124200; 105770; 171120; 102080	153120; 257480; 171630; 100440; 62065; 97877; 50407; 79060; 69601	7; 5; 10; 5; 4; 1; 4; 6; 10	2; 4; 6; 3; 3; 6; 5; 4; 6	2; 4; 6; 3; 3; 6; 5; 4; 6	2; 4; 6; 3; 3; 6; 5; 4; 6	4	By MS/MS; By MS/MS; By MS/MS; By MS/MS; By MS/MS; By MS/MS; By MS/MS; By MS/MS; By MS/MS	21.9; 38.7; 52.6; 29.9; 29.9; 48.2; 43.8; 29.9; 48.2	128540; 105450; 185290; 123300; 117570; 74042; 158630; 75187; 141620	206410; 81730; 134630; 55887; 77289; 33370; 86462; 52810; 70653	3; 6; 5; 3; 1; 5; 5; 2; 5
alr7083	0.984083	1	false	truth	1.0047	0.563724	0.417119	0.0802587	0.648685	1.53606	5; 4; 4; 6; 3; 1; 4; 2; 5	5; 4; 4; 6; 3; 1; 4; 2; 5	5; 4; 4; 6; 3; 1; 4; 2; 5	4	By MS/MS; By MS/MS; By MS/MS; By MS/MS; By MS/MS; By MS/MS; By MS/MS; By MS/MS; By MS/MS	16.9; 14.2; 15.6; 20.7; 9.9; 4.8; 13.2; 7; 15.6	18518; 12155; 15377; 41467; 14599; 7051.8; 13491; 0; 12718	10817; 8703.5; 0; 15254; 8323.6; 0; 7453.8; 0; 18910	4; 1; 2; 3; 2; 3; 4; 1; 3	2; 2; 4; 3; 3; 6; 2; 4; 1	2; 2; 4; 3; 3; 6; 2; 4; 1	2; 2; 4; 3; 3; 6; 2; 4; 1	3	By MS/MS; By matching; By MS/MS; By MS/MS; By MS/MS; By MS/MS; By MS/MS; By matching; By matching	9.1; 6.2; 15.9; 11.6; 9.7; 19.6; 6.2; 15.6; 3.5	6128.9; 13753; 22657; 42497; 14374; 30158; 14401; 11352; 7861	0; 0; 13072; 23981; 9501.1; 6465.2; 17063; 7299.8; 0	1; 0; 1; 1; 0; 2; 1; 0; 0
alr7092	0.724747	1	false	truth	1.06544	0.333456	0.327138	0.0229218	0.758542	1.42233	3; 3; 0; 0; 1; 2; 2; 3; 3	3; 3; 0; 0; 1; 2; 2; 3; 3	3; 3; 0; 0; 1; 2; 2; 3; 3	2	By MS/MS; By MS/MS; By matching; By matching; By MS/MS; By matching; By MS/MS; By MS/MS; By MS/MS	43.9; 43.9; 0; 0; 8.4; 35.5; 24.3; 43.9; 43.9	18396; 21511; 0; 0; 30123; 2551.4; 15377; 30845; 9853	10719; 9646.8; 0; 0; 0; 0; 0; 13555; 0	4; 1; 0; 0; 1; 0; 2; 1; 1	2; 2; 2; 3; 2; 3; 3; 2; 2	2; 2; 2; 3; 2; 3; 3; 2; 2	2; 2; 2; 3; 2; 3; 3; 2; 2	2	By MS/MS; By MS/MS; By matching; By MS/MS; By MS/MS; By MS/MS; By MS/MS; By matching; By MS/MS	28; 24.3; 28; 43.9; 28; 43.9; 43.9; 24.3; 28	14905; 13377; 7518.7; 27882; 22657; 24674; 14473; 23053; 30602	11324; 0; 8540.8; 16397; 0; 13524; 8840.8; 0; 9478.5	1; 2; 0; 2; 1; 3; 2; 0; 2
alr7102	0.181793	1	false	truth	0.77668	0.37258	0.240377	0.0512036	0.568283	1.06891	2; 2; 4; 1; 0; 2; 3; 4; 4	2; 2; 4; 1; 0; 2; 3; 4; 4	2; 2; 4; 1; 0; 2; 3; 4; 4	2	By MS/MS; By MS/MS; By MS/MS; By matching; By matching; By matching; By MS/MS; By MS/MS; By MS/MS	11.4; 15; 28.5; 4.1; 0; 11.4; 21.2; 28.5; 28.5	13239; 20464; 17592; 13065; 0; 12526; 23414; 40063; 21206	18054; 13675; 6133.3; 0; 0; 11065; 16588; 19021; 19233	2; 1; 2; 0; 0; 0; 5; 3; 6	3; 2; 2; 3; 2; 2; 3; 2; 3	3; 2; 2; 3; 2; 2; 3; 2; 3	3; 2; 2; 3; 2; 2; 3; 2; 3	2	By MS/MS; By MS/MS; By matching; By MS/MS; By MS/MS; By MS/MS; By MS/MS; By MS/MS; By MS/MS	21.2; 15; 10.4; 22.3; 11.4; 15; 22.3; 18.1; 25.4	26341; 17949; 16541; 53463; 38906; 40618; 44601; 11404; 25948	17689; 0; 9982; 20368; 28465; 18080; 32042; 16156; 15399	4; 4; 0; 1; 1; 2; 6; 1; 2
alr7502	0.0162317	1	false	truth	0.334883	0.220303	#N/A	0.166275	#N/A	#N/A	0; 0; 0; 1; 2; 0; 1; 1; 1	0; 0; 0; 1; 2; 0; 1; 1; 1	0; 0; 0; 1; 2; 0; 1; 1; 1	1	By matching; By matching; By matching; By matching; By matching; By matching; By matching; By matching; By matching	0; 0; 0; 4.1; 18.5; 0; 11.3; 7.2; 7.2	0; 0; 0; 2961.2; 10295; 0; 2825.1; 11103; 9083.6	0; 0; 0; 0; 13383; 0; 0; 0; 0	0; 0; 0; 0; 0; 0; 0; 0; 0	2; 4; 3; 3; 2; 3; 4; 4; 5	2; 4; 3; 3; 2; 3; 4; 4; 5	2; 4; 3; 3; 2; 3; 4; 4; 5	3	By MS/MS; By MS/MS; By MS/MS; By MS/MS; By MS/MS; By MS/MS; By MS/MS; By MS/MS; By MS/MS	15.4; 32.3; 24.6; 21.5; 17.4; 21.5; 24.1; 30.3; 30.3	38877; 51520; 51715; 65692; 73023; 32822; 45801; 63179; 195250	43824; 53183; 52466; 17403; 33113; 28999; 22738; 28292; 97293	2; 4; 5; 2; 1; 2; 5; 1; 7
alr7504	0.0110678	1	false	truth	0	#N/A	#N/A	#N/A	#N/A	#N/A	2; 0; 1; 0; 0; 2; 0; 0; 0	2; 0; 1; 0; 0; 2; 0; 0; 0	2; 0; 1; 0; 0; 2; 0; 0; 0	0	By matching; By matching; By matching; By matching; By matching; By matching; By matching; By matching; By matching	7.5; 0; 3.8; 0; 0; 8.4; 0; 0; 0	4420.2; 0; 4084.2; 0; 0; 6774.1; 0; 0; 0	0; 0; 0; 0; 0; 0; 0; 0; 0	0; 0; 0; 0; 0; 0; 0; 0; 0	1; 0; 3; 3; 5; 7; 2; 4; 3	1; 0; 3; 3; 5; 7; 2; 4; 3	1; 0; 3; 3; 5; 7; 2; 4; 3	3	By matching; By matching; By MS/MS; By MS/MS; By MS/MS; By MS/MS; By MS/MS; By MS/MS; By MS/MS	4.8; 0; 11.5; 13.5; 21.9; 26.7; 7.9; 15.6; 10.8	1630.1; 0; 28335; 22452; 37450; 49029; 47624; 31765; 7495.9	0; 0; 0; 19042; 0; 36597; 29635; 22225; 0	0; 0; 1; 3; 4; 6; 5; 1; 1
alr7524	0.204749	1	false	truth	0.715783	0.432157	0.518743	0.143219	0.262378	1.40849	1; 0; 2; 2; 2; 1; 1; 1; 1	1; 0; 2; 2; 2; 1; 1; 1; 1	1; 0; 2; 2; 2; 1; 1; 1; 1	1	By matching; By matching; By MS/MS; By MS/MS; By MS/MS; By MS/MS; By matching; By matching; By MS/MS	10.9; 0; 16.1; 17.6; 17.6; 10.9; 10.9; 10.9; 10.9	1236.6; 0; 10847; 6046.9; 10389; 9729.6; 2867.6; 3152.9; 3369.6	0; 0; 9415; 0; 5161; 0; 0; 0; 0	0; 0; 1; 1; 1; 1; 0; 0; 2	1; 0; 0; 2; 2; 2; 2; 2; 2	1; 0; 0; 2; 2; 2; 2; 2; 2	1; 0; 0; 2; 2; 2; 2; 2; 2	2	By matching; By matching; By matching; By MS/MS; By MS/MS; By MS/MS; By MS/MS; By MS/MS; By MS/MS	6.7; 0; 0; 20.2; 17.6; 17.6; 17.6; 17.6; 17.6	10465; 0; 0; 11018; 24350; 9371.3; 24606; 18378; 22829	0; 0; 0; 0; 16506; 7502.2; 10670; 8510.2; 13169	0; 0; 0; 2; 3; 2; 2; 1; 2
asl0749	0.479469	1	false	false	1.6204	1.36534	1.6805	0.199541	0.103081	3.94559	1; 2; 2; 2; 1; 1; 0; 1; 1	1; 2; 2; 2; 1; 1; 0; 1; 1	1; 2; 2; 2; 1; 1; 0; 1; 1	1	By MS/MS; By MS/MS; By MS/MS; By MS/MS; By MS/MS; By MS/MS; By matching; By MS/MS; By MS/MS	11.2; 21.3; 21.3; 21.3; 11.2; 11.2; 0; 11.2; 11.2	25596; 26885; 23345; 35181; 38628; 34222; 0; 19539; 15867	0; 8477; 15412; 39048; 0; 0; 0; 0; 0	1; 1; 2; 4; 2; 1; 0; 2; 1	1; 1; 2; 2; 2; 2; 1; 0; 1	1; 1; 2; 2; 2; 2; 1; 0; 1	1; 1; 2; 2; 2; 2; 1; 0; 1	1	By matching; By MS/MS; By MS/MS; By MS/MS; By MS/MS; By MS/MS; By MS/MS; By matching; By MS/MS	10.1; 11.2; 21.3; 21.3; 21.3; 42.7; 11.2; 0; 11.2	583.09; 18538; 24048; 40835; 25549; 29901; 20977; 0; 21961	0; 0; 16714; 11537; 13120; 0; 0; 0; 0	0; 2; 1; 1; 1; 1; 2; 0; 1
asl0846	0.2044	1	false	false	2.17901	2.52284	#N/A	2.23195	#N/A	#N/A	1; 1; 2; 0; 1; 1; 1; 0; 1	1; 1; 2; 0; 1; 1; 1; 0; 1	1; 1; 2; 0; 1; 1; 1; 0; 1	1	By MS/MS; By matching; By MS/MS; By matching; By matching; By MS/MS; By matching; By matching; By matching	22.6; 22.6; 35.5; 0; 22.6; 22.6; 22.6; 0; 12.9	10373; 4696.6; 114910; 0; 4127.7; 95318; 3568; 0; 1707.8	0; 0; 81666; 0; 0; 49444; 0; 0; 0	1; 0; 2; 0; 0; 0; 0; 0; 0	0; 1; 2; 2; 0; 1; 2; 2; 1	0; 1; 2; 2; 0; 1; 2; 2; 1	0; 1; 2; 2; 0; 1; 2; 2; 1	1	By matching; By MS/MS; By MS/MS; By matching; By matching; By matching; By matching; By matching; By MS/MS	0; 22.6; 35.5; 35.5; 0; 22.6; 35.5; 35.5; 22.6	0; 41596; 86180; 6569.8; 0; 4286.7; 6072; 6738.3; 142460	0; 0; 71933; 0; 0; 0; 12832; 14161; 0	0; 1; 4; 0; 0; 0; 0; 0; 2
[truncated: 1,082 more rows]
